# Supplementary material for: Insights into the Ligand Binding to Bromodomain-Containing Protein 9 (BRD9): A Guide to the Selection of Potential Binders by Computational Methods
Source: MDPI journal article supplement (doi:10.3390/molecules26237192), 2021-11-27
Supplement: s1 [file s1]

# Insights into the ligand binding to bromodomain-containing protein 9 (BRD9): a guide to the selection of potential binders by computational methods

Simona De Vita <sup>1</sup>, Maria Giovanna Chini <sup>2</sup>, Giuseppe Bifulco <sup>1</sup> and Gianluigi Lauro <sup>1,\*</sup>

<sup>1</sup> Department of Pharmacy, University of Salerno, Via Giovanni Paolo II 132, Fisciano 84084, Italy; sdevita@unisa.it (S.D.V), bifulco@unisa.it (G.B.), glauro@unisa.it (G.L.).

<sup>2</sup> Department of Biosciences and Territory, University of Molise, C.da Fonte Lappone, Pesche 86090, Italy; mariagiovanna.chini@unimol.it

\* Correspondence: glauro@unisa.it; Telephone: +39 (0)89 969176, Fax: +39 (0)89 969602.

## Test set coordinates

### 5F1H

```
REMARK      4          COMPLIES WITH FORMAT V. 3.0, 1-DEC-2006
REMARK 888
REMARK 888 WRITTEN BY MAESTRO (A PRODUCT OF SCHRODINGER, LLC)
TITLE      5F1H
MODEL      1
ATOM       1  CH3 ACE A  21          5.429  26.182  18.377  1.00  0.00
C
ATOM       2   C   ACE A  21          6.557  25.567  17.549  1.00  0.00
C
ATOM       3   O   ACE A  21          7.663  25.398  18.056  1.00  0.00
O
ATOM       4  1H   ACE A  21          5.801  26.406  19.402  1.00  0.00
H
ATOM       5  2H   ACE A  21          5.080  27.122  17.893  1.00  0.00
H
ATOM       6  3H   ACE A  21          4.578  25.468  18.437  1.00  0.00
H
ATOM       7   N   SER A  22          6.336  25.203  16.236  1.00  67.75
N
ANISOU     7   N   SER A  22      8468   7332   9943   2328   2914   -857
ATOM       8  CA   SER A  22          7.421  24.614  15.447  1.00  64.54
C
ANISOU     8  CA   SER A  22      8139   7062   9320   2252   2575   -728
ATOM       9   C   SER A  22          8.621  25.561  15.330  1.00  66.69
C
ANISOU     9   C   SER A  22      8679   7233   9428   2243   2471   -692
ATOM      10   O   SER A  22          8.440  26.771  15.199  1.00  68.48
O
ANISOU    10   O   SER A  22      8928   7310   9779   2381   2543   -704
ATOM      11  CB   SER A  22          6.921  24.231  14.057  1.00  67.99
C
ANISOU    11  CB   SER A  22      8277   7607   9947   2395   2301   -626
ATOM      12  OG   SER A  22          7.870  23.447  13.353  1.00  73.90
O
ANISOU    12  OG   SER A  22      9106   8485  10486   2300   2043   -515
ATOM      13  H1   SER A  22          5.427  25.342  15.819  1.00  0.00
H
ATOM      14  HA   SER A  22          7.753  23.706  15.951  1.00  0.00
H
ATOM      15  HB3   SER A  22          6.704  25.135  13.488  1.00  0.00
H
ATOM      16  HB2   SER A  22          5.988  23.676  14.148  1.00  0.00
H
ATOM      17  HG   SER A  22          8.685  23.944  13.253  1.00  0.00
H
ATOM      18   N   THR A  23          9.842  25.000  15.383  1.00  60.01
N
ANISOU    18   N   THR A  23      8010   6442   8349   2080   2308   -661
ATOM      19  CA   THR A  23         11.106  25.740  15.287  1.00  58.27
C
ANISOU    19  CA   THR A  23      7989   6101   8050   2034   2209   -659
```

|        |    |      |     |   |    |        |        |        |      |       |      |
|--------|----|------|-----|---|----|--------|--------|--------|------|-------|------|
| ATOM C | 20 | C    | THR | A | 23 | 11.629 | 25.734 | 13.829 | 1.00 | 59.52 |      |
| ANISOU | 20 | C    | THR | A | 23 | 8058   | 6286   | 8271   | 2099 | 2018  | -505 |
| ATOM O | 21 | O    | THR | A | 23 | 11.195 | 24.881 | 13.053 | 1.00 | 57.25 |      |
| ANISOU | 21 | O    | THR | A | 23 | 7612   | 6148   | 7993   | 2138 | 1895  | -412 |
| ATOM C | 22 | CB   | THR | A | 23 | 12.157 | 25.128 | 16.242 | 1.00 | 64.59 |      |
| ANISOU | 22 | CB   | THR | A | 23 | 9020   | 6896   | 8626   | 1832 | 2127  | -755 |
| ATOM O | 23 | OG1  | THR | A | 23 | 12.431 | 23.780 | 15.856 | 1.00 | 62.51 |      |
| ANISOU | 23 | OG1  | THR | A | 23 | 8676   | 6805   | 8272   | 1736 | 1957  | -681 |
| ATOM C | 24 | CG2  | THR | A | 23 | 11.750 | 25.195 | 17.706 | 1.00 | 64.76 |      |
| ANISOU | 24 | CG2  | THR | A | 23 | 9273   | 6835   | 8499   | 1786 | 2326  | -906 |
| ATOM H | 25 | H    | THR | A | 23 | 9.934  | 24.001 | 15.496 | 1.00 | 0.00  |      |
| ATOM H | 26 | HA   | THR | A | 23 | 10.926 | 26.773 | 15.586 | 1.00 | 0.00  |      |
| ATOM H | 27 | HB   | THR | A | 23 | 13.079 | 25.698 | 16.129 | 1.00 | 0.00  |      |
| ATOM H | 28 | HG1  | THR | A | 23 | 11.692 | 23.219 | 16.104 | 1.00 | 0.00  |      |
| ATOM H | 29 | HG21 | THR | A | 23 | 12.531 | 24.749 | 18.322 | 1.00 | 0.00  |      |
| ATOM H | 30 | HG22 | THR | A | 23 | 11.609 | 26.236 | 17.997 | 1.00 | 0.00  |      |
| ATOM H | 31 | HG23 | THR | A | 23 | 10.818 | 24.648 | 17.850 | 1.00 | 0.00  |      |
| ATOM N | 32 | N    | PRO | A | 24 | 12.582 | 26.627 | 13.438 | 1.00 | 56.50 |      |
| ANISOU | 32 | N    | PRO | A | 24 | 7802   | 5735   | 7932   | 2105 | 2012  | -484 |
| ATOM C | 33 | CA   | PRO | A | 24 | 13.104 | 26.590 | 12.059 | 1.00 | 55.25 |      |
| ANISOU | 33 | CA   | PRO | A | 24 | 7638   | 5553   | 7802   | 2164 | 1912  | -330 |
| ATOM C | 34 | C    | PRO | A | 24 | 13.771 | 25.267 | 11.674 | 1.00 | 56.23 |      |
| ANISOU | 34 | C    | PRO | A | 24 | 7716   | 5823   | 7825   | 2025 | 1752  | -280 |
| ATOM O | 35 | O    | PRO | A | 24 | 13.697 | 24.889 | 10.506 | 1.00 | 54.42 |      |
| ANISOU | 35 | O    | PRO | A | 24 | 7466   | 5639   | 7574   | 2107 | 1668  | -146 |
| ATOM C | 36 | CB   | PRO | A | 24 | 14.110 | 27.738 | 12.037 | 1.00 | 58.05 |      |
| ANISOU | 36 | CB   | PRO | A | 24 | 8151   | 5648   | 8257   | 2141 | 2028  | -361 |
| ATOM C | 37 | CG   | PRO | A | 24 | 13.674 | 28.653 | 13.118 | 1.00 | 64.71 |      |
| ANISOU | 37 | CG   | PRO | A | 24 | 9051   | 6388   | 9149   | 2162 | 2164  | -504 |
| ATOM C | 38 | CD   | PRO | A | 24 | 13.200 | 27.734 | 14.198 | 1.00 | 59.84 |      |
| ANISOU | 38 | CD   | PRO | A | 24 | 8396   | 5944   | 8397   | 2060 | 2126  | -608 |
| ATOM H | 39 | HA   | PRO | A | 24 | 12.295 | 26.804 | 11.360 | 1.00 | 0.00  |      |
| ATOM H | 40 | HB3  | PRO | A | 24 | 14.048 | 28.255 | 11.079 | 1.00 | 0.00  |      |
| ATOM H | 41 | HB2  | PRO | A | 24 | 15.103 | 27.353 | 12.268 | 1.00 | 0.00  |      |

|        |    |      |     |   |    |        |        |        |      |           |
|--------|----|------|-----|---|----|--------|--------|--------|------|-----------|
| ATOM   | 42 | HG3  | PRO | A | 24 | 12.837 | 29.256 | 12.765 | 1.00 | 0.00      |
| H      |    |      |     |   |    |        |        |        |      |           |
| ATOM   | 43 | HG2  | PRO | A | 24 | 14.532 | 29.220 | 13.478 | 1.00 | 0.00      |
| H      |    |      |     |   |    |        |        |        |      |           |
| ATOM   | 44 | HD2  | PRO | A | 24 | 14.060 | 27.355 | 14.750 | 1.00 | 0.00      |
| H      |    |      |     |   |    |        |        |        |      |           |
| ATOM   | 45 | HD3  | PRO | A | 24 | 12.433 | 28.237 | 14.787 | 1.00 | 0.00      |
| H      |    |      |     |   |    |        |        |        |      |           |
| ATOM   | 46 | N    | ILE | A | 25 | 14.413 | 24.564 | 12.644 | 1.00 | 52.50     |
| N      |    |      |     |   |    |        |        |        |      |           |
| ANISOU | 46 | N    | ILE | A | 25 | 7265   | 5407   | 7275   | 1833 | 1691 -392 |
| ATOM   | 47 | CA   | ILE | A | 25 | 15.048 | 23.262 | 12.398 | 1.00 | 50.77     |
| C      |    |      |     |   |    |        |        |        |      |           |
| ANISOU | 47 | CA   | ILE | A | 25 | 6994   | 5317   | 6978   | 1701 | 1532 -360 |
| ATOM   | 48 | C    | ILE | A | 25 | 13.969 | 22.204 | 12.149 | 1.00 | 52.68     |
| C      |    |      |     |   |    |        |        |        |      |           |
| ANISOU | 48 | C    | ILE | A | 25 | 7099   | 5779   | 7136   | 1746 | 1472 -292 |
| ATOM   | 49 | O    | ILE | A | 25 | 14.086 | 21.447 | 11.188 | 1.00 | 50.48     |
| O      |    |      |     |   |    |        |        |        |      |           |
| ANISOU | 49 | O    | ILE | A | 25 | 6754   | 5591   | 6834   | 1753 | 1363 -191 |
| ATOM   | 50 | CB   | ILE | A | 25 | 16.116 | 22.843 | 13.470 | 1.00 | 54.15     |
| C      |    |      |     |   |    |        |        |        |      |           |
| ANISOU | 50 | CB   | ILE | A | 25 | 7508   | 5698   | 7367   | 1514 | 1424 -507 |
| ATOM   | 51 | CG1  | ILE | A | 25 | 16.852 | 21.520 | 13.108 | 1.00 | 53.62     |
| C      |    |      |     |   |    |        |        |        |      |           |
| ANISOU | 51 | CG1  | ILE | A | 25 | 7371   | 5738   | 7264   | 1396 | 1250 -469 |
| ATOM   | 52 | CG2  | ILE | A | 25 | 15.546 | 22.775 | 14.888 | 1.00 | 55.98     |
| C      |    |      |     |   |    |        |        |        |      |           |
| ANISOU | 52 | CG2  | ILE | A | 25 | 7871   | 5952   | 7448   | 1487 | 1455 -633 |
| ATOM   | 53 | CD1  | ILE | A | 25 | 17.771 | 21.558 | 11.887 | 1.00 | 62.76     |
| C      |    |      |     |   |    |        |        |        |      |           |
| ANISOU | 53 | CD1  | ILE | A | 25 | 8464   | 6801   | 8582   | 1378 | 1259 -390 |
| ATOM   | 54 | H    | ILE | A | 25 | 14.469 | 24.933 | 13.582 | 1.00 | 0.00      |
| H      |    |      |     |   |    |        |        |        |      |           |
| ATOM   | 55 | HA   | ILE | A | 25 | 15.590 | 23.365 | 11.458 | 1.00 | 0.00      |
| H      |    |      |     |   |    |        |        |        |      |           |
| ATOM   | 56 | HB   | ILE | A | 25 | 16.873 | 23.627 | 13.477 | 1.00 | 0.00      |
| H      |    |      |     |   |    |        |        |        |      |           |
| ATOM   | 57 | HG13 | ILE | A | 25 | 16.118 | 20.724 | 12.980 | 1.00 | 0.00      |
| H      |    |      |     |   |    |        |        |        |      |           |
| ATOM   | 58 | HG12 | ILE | A | 25 | 17.419 | 21.176 | 13.973 | 1.00 | 0.00      |
| H      |    |      |     |   |    |        |        |        |      |           |
| ATOM   | 59 | HG21 | ILE | A | 25 | 16.333 | 22.480 | 15.583 | 1.00 | 0.00      |
| H      |    |      |     |   |    |        |        |        |      |           |
| ATOM   | 60 | HG22 | ILE | A | 25 | 15.159 | 23.754 | 15.172 | 1.00 | 0.00      |
| H      |    |      |     |   |    |        |        |        |      |           |
| ATOM   | 61 | HG23 | ILE | A | 25 | 14.740 | 22.042 | 14.921 | 1.00 | 0.00      |
| H      |    |      |     |   |    |        |        |        |      |           |
| ATOM   | 62 | HD11 | ILE | A | 25 | 18.223 | 20.577 | 11.741 | 1.00 | 0.00      |
| H      |    |      |     |   |    |        |        |        |      |           |
| ATOM   | 63 | HD12 | ILE | A | 25 | 17.191 | 21.825 | 11.003 | 1.00 | 0.00      |
| H      |    |      |     |   |    |        |        |        |      |           |
| ATOM   | 64 | HD13 | ILE | A | 25 | 18.555 | 22.299 | 12.044 | 1.00 | 0.00      |
| H      |    |      |     |   |    |        |        |        |      |           |
| ATOM   | 65 | N    | GLN | A | 26 | 12.892 | 22.201 | 12.971 | 1.00 | 49.94     |
| N      |    |      |     |   |    |        |        |        |      |           |
| ANISOU | 65 | N    | GLN | A | 26 | 6711   | 5487   | 6779   | 1782 | 1573 -359 |

|        |    |      |     |   |    |        |        |        |      |       |      |
|--------|----|------|-----|---|----|--------|--------|--------|------|-------|------|
| ATOM C | 66 | CA   | GLN | A | 26 | 11.767 | 21.273 | 12.831 | 1.00 | 49.50 |      |
| ANISOU | 66 | CA   | GLN | A | 26 | 6472   | 5594   | 6740   | 1815 | 1565  | -336 |
| ATOM C | 67 | C    | GLN | A | 26 | 11.095 | 21.426 | 11.465 | 1.00 | 53.70 |      |
| ANISOU | 67 | C    | GLN | A | 26 | 6848   | 6160   | 7397   | 2002 | 1456  | -231 |
| ATOM O | 68 | O    | GLN | A | 26 | 10.803 | 20.419 | 10.822 | 1.00 | 52.89 |      |
| ANISOU | 68 | O    | GLN | A | 26 | 6616   | 6190   | 7290   | 2001 | 1315  | -185 |
| ATOM C | 69 | CB   | GLN | A | 26 | 10.748 | 21.460 | 13.965 | 1.00 | 52.41 |      |
| ANISOU | 69 | CB   | GLN | A | 26 | 6828   | 5934   | 7150   | 1823 | 1792  | -449 |
| ATOM C | 70 | CG   | GLN | A | 26 | 11.167 | 20.782 | 15.267 | 1.00 | 59.23 |      |
| ANISOU | 70 | CG   | GLN | A | 26 | 7910   | 6790   | 7807   | 1647 | 1868  | -540 |
| ATOM C | 71 | CD   | GLN | A | 26 | 10.341 | 21.214 | 16.456 | 1.00 | 69.66 |      |
| ANISOU | 71 | CD   | GLN | A | 26 | 9336   | 8009   | 9123   | 1659 | 2171  | -656 |
| ATOM O | 72 | OE1  | GLN | A | 26 | 10.127 | 22.405 | 16.700 | 1.00 | 64.32 |      |
| ANISOU | 72 | OE1  | GLN | A | 26 | 8723   | 7197   | 8519   | 1747 | 2305  | -716 |
| ATOM N | 73 | NE2  | GLN | A | 26 | 9.904  | 20.252 | 17.257 | 1.00 | 58.86 |      |
| ANISOU | 73 | NE2  | GLN | A | 26 | 8032   | 6674   | 7659   | 1563 | 2325  | -694 |
| ATOM H | 74 | H    | GLN | A | 26 | 12.835 | 22.864 | 13.731 | 1.00 | 0.00  |      |
| ATOM H | 75 | HA   | GLN | A | 26 | 12.160 | 20.259 | 12.899 | 1.00 | 0.00  |      |
| ATOM H | 76 | HB3  | GLN | A | 26 | 9.780  | 21.071 | 13.650 | 1.00 | 0.00  |      |
| ATOM H | 77 | HB2  | GLN | A | 26 | 10.597 | 22.525 | 14.144 | 1.00 | 0.00  |      |
| ATOM H | 78 | HG3  | GLN | A | 26 | 12.219 | 20.991 | 15.462 | 1.00 | 0.00  |      |
| ATOM H | 79 | HG2  | GLN | A | 26 | 11.096 | 19.701 | 15.151 | 1.00 | 0.00  |      |
| ATOM H | 80 | HE22 | GLN | A | 26 | 9.347  | 20.484 | 18.067 | 1.00 | 0.00  |      |
| ATOM H | 81 | HE21 | GLN | A | 26 | 10.128 | 19.288 | 17.057 | 1.00 | 0.00  |      |
| ATOM N | 82 | N    | GLN | A | 27 | 10.899 | 22.683 | 11.009 | 1.00 | 51.06 |      |
| ANISOU | 82 | N    | GLN | A | 27 | 6563   | 5682   | 7155   | 2174 | 1496  | -200 |
| ATOM C | 83 | CA   | GLN | A | 27 | 10.296 | 23.000 | 9.711  | 1.00 | 51.99 |      |
| ANISOU | 83 | CA   | GLN | A | 27 | 6632   | 5774   | 7349   | 2403 | 1347  | -100 |
| ATOM C | 84 | C    | GLN | A | 27 | 11.158 | 22.464 | 8.571  | 1.00 | 54.81 |      |
| ANISOU | 84 | C    | GLN | A | 27 | 7128   | 6145   | 7553   | 2390 | 1194  | 26   |
| ATOM O | 85 | O    | GLN | A | 27 | 10.638 | 21.804 | 7.664  | 1.00 | 54.97 |      |
| ANISOU | 85 | O    | GLN | A | 27 | 7086   | 6246   | 7555   | 2498 | 992   | 82   |
| ATOM C | 86 | CB   | GLN | A | 27 | 10.069 | 24.517 | 9.561  | 1.00 | 55.34 |      |
| ANISOU | 86 | CB   | GLN | A | 27 | 7159   | 5996   | 7872   | 2590 | 1444  | -87  |
| ATOM C | 87 | CG   | GLN | A | 27 | 8.858  | 25.046 | 10.330 | 1.00 | 71.84 |      |

|        |     |      |     |   |    |        |        |        |      |       |      |
|--------|-----|------|-----|---|----|--------|--------|--------|------|-------|------|
| ANISOU | 87  | CG   | GLN | A | 27 | 9062   | 8057   | 10176  | 2688 | 1569  | -205 |
| ATOM   | 88  | CD   | GLN | A | 27 | 7.559  | 24.389 | 9.923  | 1.00 | 91.48 |      |
| C      |     |      |     |   |    |        |        |        |      |       |      |
| ANISOU | 88  | CD   | GLN | A | 27 | 11251  | 10641  | 12864  | 2831 | 1406  | -236 |
| ATOM   | 89  | OE1  | GLN | A | 27 | 7.113  | 24.638 | 8.700  | 1.00 | 87.92 |      |
| O      |     |      |     |   |    |        |        |        |      |       |      |
| ANISOU | 89  | OE1  | GLN | A | 27 | 10578  | 10288  | 12538  | 2728 | 1507  | -347 |
| ATOM   | 90  | NE2  | GLN | A | 27 | 6.959  | 23.631 | 10.689 | 1.00 | 83.71 |      |
| N      |     |      |     |   |    |        |        |        |      |       |      |
| ANISOU | 90  | NE2  | GLN | A | 27 | 10274  | 9604   | 11928  | 3077 | 1146  | -151 |
| ATOM   | 91  | H    | GLN | A | 27 | 11.174 | 23.474 | 11.574 | 1.00 | 0.00  |      |
| H      |     |      |     |   |    |        |        |        |      |       |      |
| ATOM   | 92  | HA   | GLN | A | 27 | 9.325  | 22.507 | 9.661  | 1.00 | 0.00  |      |
| H      |     |      |     |   |    |        |        |        |      |       |      |
| ATOM   | 93  | HB3  | GLN | A | 27 | 9.962  | 24.764 | 8.505  | 1.00 | 0.00  |      |
| H      |     |      |     |   |    |        |        |        |      |       |      |
| ATOM   | 94  | HB2  | GLN | A | 27 | 10.963 | 25.050 | 9.884  | 1.00 | 0.00  |      |
| H      |     |      |     |   |    |        |        |        |      |       |      |
| ATOM   | 95  | HG3  | GLN | A | 27 | 8.780  | 26.123 | 10.185 | 1.00 | 0.00  |      |
| H      |     |      |     |   |    |        |        |        |      |       |      |
| ATOM   | 96  | HG2  | GLN | A | 27 | 9.017  | 24.902 | 11.399 | 1.00 | 0.00  |      |
| H      |     |      |     |   |    |        |        |        |      |       |      |
| ATOM   | 97  | HE22 | GLN | A | 27 | 6.092  | 23.202 | 10.398 | 1.00 | 0.00  |      |
| H      |     |      |     |   |    |        |        |        |      |       |      |
| ATOM   | 98  | HE21 | GLN | A | 27 | 7.334  | 23.440 | 11.607 | 1.00 | 0.00  |      |
| H      |     |      |     |   |    |        |        |        |      |       |      |
| ATOM   | 99  | N    | LEU | A | 28 | 12.481 | 22.696 | 8.653  | 1.00 | 49.51 |      |
| N      |     |      |     |   |    |        |        |        |      |       |      |
| ANISOU | 99  | N    | LEU | A | 28 | 6636   | 5374   | 6801   | 2250 | 1295  | 47   |
| ATOM   | 100 | CA   | LEU | A | 28 | 13.431 | 22.218 | 7.658  | 1.00 | 48.53 |      |
| C      |     |      |     |   |    |        |        |        |      |       |      |
| ANISOU | 100 | CA   | LEU | A | 28 | 6652   | 5215   | 6572   | 2209 | 1245  | 150  |
| ATOM   | 101 | C    | LEU | A | 28 | 13.472 | 20.691 | 7.600  | 1.00 | 49.22 |      |
| C      |     |      |     |   |    |        |        |        |      |       |      |
| ANISOU | 101 | C    | LEU | A | 28 | 6613   | 5507   | 6581   | 2082 | 1098  | 144  |
| ATOM   | 102 | O    | LEU | A | 28 | 13.408 | 20.129 | 6.505  | 1.00 | 47.87 |      |
| O      |     |      |     |   |    |        |        |        |      |       |      |
| ANISOU | 102 | O    | LEU | A | 28 | 6504   | 5366   | 6316   | 2156 | 975   | 234  |
| ATOM   | 103 | CB   | LEU | A | 28 | 14.832 | 22.791 | 7.915  | 1.00 | 48.78 |      |
| C      |     |      |     |   |    |        |        |        |      |       |      |
| ANISOU | 103 | CB   | LEU | A | 28 | 6821   | 5056   | 6656   | 2067 | 1425  | 127  |
| ATOM   | 104 | CG   | LEU | A | 28 | 15.942 | 22.238 | 7.020  | 1.00 | 54.12 |      |
| C      |     |      |     |   |    |        |        |        |      |       |      |
| ANISOU | 104 | CG   | LEU | A | 28 | 7611   | 5657   | 7297   | 1984 | 1460  | 203  |
| ATOM   | 105 | CD1  | LEU | A | 28 | 15.791 | 22.702 | 5.582  | 1.00 | 56.23 |      |
| C      |     |      |     |   |    |        |        |        |      |       |      |
| ANISOU | 105 | CD1  | LEU | A | 28 | 8140   | 5764   | 7462   | 2186 | 1520  | 360  |
| ATOM   | 106 | CD2  | LEU | A | 28 | 17.279 | 22.583 | 7.553  | 1.00 | 57.38 |      |
| C      |     |      |     |   |    |        |        |        |      |       |      |
| ANISOU | 106 | CD2  | LEU | A | 28 | 8019   | 5903   | 7880   | 1793 | 1604  | 106  |
| ATOM   | 107 | H    | LEU | A | 28 | 12.854 | 23.222 |        |      |       |      |

|        |     |      |     |   |    |        |        |        |      |       |      |
|--------|-----|------|-----|---|----|--------|--------|--------|------|-------|------|
| ATOM H | 110 | HB2  | LEU | A | 28 | 14.800 | 23.876 | 7.820  | 1.00 | 0.00  |      |
| ATOM H | 111 | HG   | LEU | A | 28 | 15.857 | 21.151 | 7.025  | 1.00 | 0.00  |      |
| ATOM H | 112 | HD11 | LEU | A | 28 | 16.599 | 22.287 | 4.979  | 1.00 | 0.00  |      |
| ATOM H | 113 | HD12 | LEU | A | 28 | 14.833 | 22.362 | 5.189  | 1.00 | 0.00  |      |
| ATOM H | 114 | HD13 | LEU | A | 28 | 15.832 | 23.791 | 5.545  | 1.00 | 0.00  |      |
| ATOM H | 115 | HD21 | LEU | A | 28 | 18.048 | 22.177 | 6.896  | 1.00 | 0.00  |      |
| ATOM H | 116 | HD22 | LEU | A | 28 | 17.381 | 23.667 | 7.605  | 1.00 | 0.00  |      |
| ATOM H | 117 | HD23 | LEU | A | 28 | 17.393 | 22.160 | 8.551  | 1.00 | 0.00  |      |
| ATOM N | 118 | N    | LEU | A | 29 | 13.560 | 20.024 | 8.764  | 1.00 | 45.01 |      |
| ANISOU | 118 | N    | LEU | A | 29 | 5952   | 5089   | 6062   | 1905 | 1112  | 39   |
| ATOM C | 119 | CA   | LEU | A | 29 | 13.615 | 18.562 | 8.803  | 1.00 | 43.59 |      |
| ANISOU | 119 | CA   | LEU | A | 29 | 5669   | 5081   | 5814   | 1778 | 995   | 32   |
| ATOM C | 120 | C    | LEU | A | 29 | 12.317 | 17.919 | 8.312  | 1.00 | 47.97 |      |
| ANISOU | 120 | C    | LEU | A | 29 | 6053   | 5775   | 6398   | 1887 | 864   | 42   |
| ATOM O | 121 | O    | LEU | A | 29 | 12.383 | 16.919 | 7.601  | 1.00 | 46.46 |      |
| ANISOU | 121 | O    | LEU | A | 29 | 5831   | 5678   | 6145   | 1859 | 726   | 84   |
| ATOM C | 122 | CB   | LEU | A | 29 | 14.052 | 18.026 | 10.175 | 1.00 | 42.84 |      |
| ANISOU | 122 | CB   | LEU | A | 29 | 5564   | 5026   | 5689   | 1586 | 1038  | -75  |
| ATOM C | 123 | CG   | LEU | A | 29 | 15.414 | 18.522 | 10.689 | 1.00 | 47.39 |      |
| ANISOU | 123 | CG   | LEU | A | 29 | 6270   | 5450   | 6285   | 1472 | 1068  | -132 |
| ATOM C | 124 | CD1  | LEU | A | 29 | 15.679 | 18.025 | 12.072 | 1.00 | 47.73 |      |
| ANISOU | 124 | CD1  | LEU | A | 29 | 6371   | 5510   | 6252   | 1339 | 1036  | -249 |
| ATOM C | 125 | CD2  | LEU | A | 29 | 16.558 | 18.135 | 9.766  | 1.00 | 48.32 |      |
| ANISOU | 125 | CD2  | LEU | A | 29 | 6405   | 5514   | 6441   | 1410 | 1017  | -74  |
| ATOM H | 126 | H    | LEU | A | 29 | 13.589 | 20.532 | 9.636  | 1.00 | 0.00  |      |
| ATOM H | 127 | HA   | LEU | A | 29 | 14.390 | 18.265 | 8.097  | 1.00 | 0.00  |      |
| ATOM H | 128 | HB3  | LEU | A | 29 | 14.051 | 16.936 | 10.152 | 1.00 | 0.00  |      |
| ATOM H | 129 | HB2  | LEU | A | 29 | 13.283 | 18.257 | 10.913 | 1.00 | 0.00  |      |
| ATOM H | 130 | HG   | LEU | A | 29 | 15.376 | 19.611 | 10.730 | 1.00 | 0.00  |      |
| ATOM H | 131 | HD11 | LEU | A | 29 | 16.648 | 18.391 | 12.411 | 1.00 | 0.00  |      |
| ATOM H | 132 | HD12 | LEU | A | 29 | 14.900 | 18.386 | 12.744 | 1.00 | 0.00  |      |
| ATOM H | 133 | HD13 | LEU | A | 29 | 15.682 | 16.935 | 12.073 | 1.00 | 0.00  |      |

|        |     |      |     |   |    |        |        |        |      |           |
|--------|-----|------|-----|---|----|--------|--------|--------|------|-----------|
| ATOM   | 134 | HD21 | LEU | A | 29 | 17.497 | 18.509 | 10.174 | 1.00 | 0.00      |
| H      |     |      |     |   |    |        |        |        |      |           |
| ATOM   | 135 | HD22 | LEU | A | 29 | 16.606 | 17.049 | 9.681  | 1.00 | 0.00      |
| H      |     |      |     |   |    |        |        |        |      |           |
| ATOM   | 136 | HD23 | LEU | A | 29 | 16.393 | 18.569 | 8.780  | 1.00 | 0.00      |
| H      |     |      |     |   |    |        |        |        |      |           |
| ATOM   | 137 | N    | GLU | A | 30 | 11.151 | 18.525 | 8.625  | 1.00 | 46.84     |
| N      |     |      |     |   |    |        |        |        |      |           |
| ANISOU | 137 | N    | GLU | A | 30 | 5784   | 5620   | 6392   | 2019 | 900 -11   |
| ATOM   | 138 | CA   | GLU | A | 30 | 9.846  | 18.051 | 8.145  | 1.00 | 48.14     |
| C      |     |      |     |   |    |        |        |        |      |           |
| ANISOU | 138 | CA   | GLU | A | 30 | 5718   | 5870   | 6701   | 2146 | 752 -45   |
| ATOM   | 139 | C    | GLU | A | 30 | 9.784  | 18.117 | 6.611  | 1.00 | 53.26     |
| C      |     |      |     |   |    |        |        |        |      |           |
| ANISOU | 139 | C    | GLU | A | 30 | 6475   | 6484   | 7279   | 2341 | 497 52    |
| ATOM   | 140 | O    | GLU | A | 30 | 9.268  | 17.193 | 5.981  | 1.00 | 53.19     |
| O      |     |      |     |   |    |        |        |        |      |           |
| ANISOU | 140 | O    | GLU | A | 30 | 6345   | 6567   | 7295   | 2379 | 281 35    |
| ATOM   | 141 | CB   | GLU | A | 30 | 8.696  | 18.854 | 8.773  | 1.00 | 51.38     |
| C      |     |      |     |   |    |        |        |        |      |           |
| ANISOU | 141 | CB   | GLU | A | 30 | 5954   | 6218   | 7349   | 2264 | 869 -142  |
| ATOM   | 142 | CG   | GLU | A | 30 | 8.148  | 18.208 | 10.033 | 0.50 | 59.86     |
| C      |     |      |     |   |    |        |        |        |      |           |
| ANISOU | 142 | CG   | GLU | A | 30 | 6856   | 7350   | 8539   | 2103 | 1088 -264 |
| ATOM   | 143 | CD   | GLU | A | 30 | 7.169  | 19.026 | 10.853 | 0.50 | 80.81     |
| C      |     |      |     |   |    |        |        |        |      |           |
| ANISOU | 143 | CD   | GLU | A | 30 | 9378   | 9898   | 11426  | 2180 | 1322 -375 |
| ATOM   | 144 | OE1  | GLU | A | 30 | 6.512  | 19.933 | 10.290 | 0.50 | 69.60     |
| O      |     |      |     |   |    |        |        |        |      |           |
| ANISOU | 144 | OE1  | GLU | A | 30 | 7861   | 8391   | 10194  | 2402 | 1232 -382 |
| ATOM   | 145 | OE2  | GLU | A | 30 | 7.039  | 18.736 | 12.064 | 0.50 | 76.49     |
| O1-    |     |      |     |   |    |        |        |        |      |           |
| ANISOU | 145 | OE2  | GLU | A | 30 | 8855   | 9335   | 10872  | 2028 | 1604 -458 |
| ATOM   | 146 | H    | GLU | A | 30 | 11.150 | 19.344 | 9.215  | 1.00 | 0.00      |
| H      |     |      |     |   |    |        |        |        |      |           |
| ATOM   | 147 | HA   | GLU | A | 30 | 9.734  | 17.009 | 8.444  | 1.00 | 0.00      |
| H      |     |      |     |   |    |        |        |        |      |           |
| ATOM   | 148 | HB3  | GLU | A | 30 | 7.893  | 18.966 | 8.045  | 1.00 | 0.00      |
| H      |     |      |     |   |    |        |        |        |      |           |
| ATOM   | 149 | HB2  | GLU | A | 30 | 9.042  | 19.862 | 9.004  | 1.00 | 0.00      |
| H      |     |      |     |   |    |        |        |        |      |           |
| ATOM   | 150 | HG3  | GLU | A | 30 | 8.978  | 17.900 | 10.668 | 1.00 | 0.00      |
| H      |     |      |     |   |    |        |        |        |      |           |
| ATOM   | 151 | HG2  | GLU | A | 30 | 7.690  | 17.253 | 9.776  | 1.00 | 0.00      |
| H      |     |      |     |   |    |        |        |        |      |           |
| ATOM   | 152 | N    | HIS | A | 31 | 10.346 | 19.195 | 6.023  | 1.00 | 50.55     |
| N      |     |      |     |   |    |        |        |        |      |           |
| ANISOU | 152 | N    | HIS | A | 31 | 6401   | 5976   | 6829   | 2462 | 534 148   |
| ATOM   | 153 | CA   | HIS | A | 31 | 10.438 | 19.413 | 4.579  | 1.00 | 51.58     |
| C      |     |      |     |   |    |        |        |        |      |           |
| ANISOU | 153 | CA   | HIS | A | 31 | 6791   | 6003   | 6805   | 2664 | 353 264   |
| ATOM   | 154 | C    | HIS | A | 31 | 11.301 | 18.308 | 3.945  | 1.00 | 52.39     |
| C      |     |      |     |   |    |        |        |        |      |           |
| ANISOU | 154 | C    | HIS | A | 31 | 7025   | 6164   | 6715   | 2533 | 308 324   |
| ATOM   | 155 | O    | HIS | A | 31 | 10.867 | 17.688 | 2.973  | 1.00 | 53.38     |
| O      |     |      |     |   |    |        |        |        |      |           |
| ANISOU | 155 | O    | HIS | A | 31 | 7214   | 6321   | 6748   | 2656 | 57 347    |

|        |     |     |     |   |    |        |        |        |      |       |     |
|--------|-----|-----|-----|---|----|--------|--------|--------|------|-------|-----|
| ATOM   | 156 | CB  | HIS | A | 31 | 11.004 | 20.814 | 4.282  | 1.00 | 53.48 |     |
| C      |     |     |     |   |    |        |        |        |      |       |     |
| ANISOU | 156 | CB  | HIS | A | 31 | 7335   | 6007   | 6976   | 2780 | 520   | 357 |
| ATOM   | 157 | CG  | HIS | A | 31 | 11.571 | 20.966 | 2.907  | 1.00 | 58.07 |     |
| C      |     |     |     |   |    |        |        |        |      |       |     |
| ANISOU | 157 | CG  | HIS | A | 31 | 8322   | 6425   | 7318   | 2924 | 469   | 502 |
| ATOM   | 158 | ND1 | HIS | A | 31 | 10.758 | 21.211 | 1.817  | 1.00 | 62.72 |     |
| N      |     |     |     |   |    |        |        |        |      |       |     |
| ANISOU | 158 | ND1 | HIS | A | 31 | 9094   | 6929   | 7806   | 3230 | 182   | 557 |
| ATOM   | 159 | CD2 | HIS | A | 31 | 12.857 | 20.897 | 2.489  | 1.00 | 59.18 |     |
| C      |     |     |     |   |    |        |        |        |      |       |     |
| ANISOU | 159 | CD2 | HIS | A | 31 | 8736   | 6438   | 7313   | 2806 | 687   | 590 |
| ATOM   | 160 | CE1 | HIS | A | 31 | 11.569 | 21.276 | 0.774  | 1.00 | 62.93 |     |
| C      |     |     |     |   |    |        |        |        |      |       |     |
| ANISOU | 160 | CE1 | HIS | A | 31 | 9571   | 6779   | 7560   | 3292 | 255   | 694 |
| ATOM   | 161 | NE2 | HIS | A | 31 | 12.842 | 21.096 | 1.130  | 1.00 | 61.18 |     |
| N      |     |     |     |   |    |        |        |        |      |       |     |
| ANISOU | 161 | NE2 | HIS | A | 31 | 9397   | 6520   | 7330   | 3032 | 595   | 717 |
| ATOM   | 162 | H   | HIS | A | 31 | 10.745 | 19.929 | 6.590  | 1.00 | 0.00  |     |
| H      |     |     |     |   |    |        |        |        |      |       |     |
| ATOM   | 163 | HA  | HIS | A | 31 | 9.435  | 19.351 | 4.157  | 1.00 | 0.00  |     |
| H      |     |     |     |   |    |        |        |        |      |       |     |
| ATOM   | 164 | HB3 | HIS | A | 31 | 11.770 | 21.057 | 5.018  | 1.00 | 0.00  |     |
| H      |     |     |     |   |    |        |        |        |      |       |     |
| ATOM   | 165 | HB2 | HIS | A | 31 | 10.223 | 21.559 | 4.435  | 1.00 | 0.00  |     |
| H      |     |     |     |   |    |        |        |        |      |       |     |
| ATOM   | 166 | HD1 | HIS | A | 31 | 9.760  | 21.299 | 1.941  | 1.00 | 0.00  |     |
| H      |     |     |     |   |    |        |        |        |      |       |     |
| ATOM   | 167 | HD2 | HIS | A | 31 | 13.647 | 20.714 | 3.202  | 1.00 | 0.00  |     |
| H      |     |     |     |   |    |        |        |        |      |       |     |
| ATOM   | 168 | HE1 | HIS | A | 31 | 11.167 | 21.456 | -0.212 | 1.00 | 0.00  |     |
| H      |     |     |     |   |    |        |        |        |      |       |     |
| ATOM   | 169 | N   | PHE | A | 32 | 12.509 | 18.055 | 4.502  | 1.00 | 45.81 |     |
| N      |     |     |     |   |    |        |        |        |      |       |     |
| ANISOU | 169 | N   | PHE | A | 32 | 6228   | 5329   | 5848   | 2295 | 527   | 328 |
| ATOM   | 170 | CA  | PHE | A | 32 | 13.409 | 17.000 | 4.016  | 1.00 | 43.86 |     |
| C      |     |     |     |   |    |        |        |        |      |       |     |
| ANISOU | 170 | CA  | PHE | A | 32 | 6067   | 5119   | 5479   | 2154 | 525   | 367 |
| ATOM   | 171 | C   | PHE | A | 32 | 12.742 | 15.626 | 4.089  | 1.00 | 46.11 |     |
| C      |     |     |     |   |    |        |        |        |      |       |     |
| ANISOU | 171 | C   | PHE | A | 32 | 6127   | 5613   | 5780   | 2090 | 321   | 304 |
| ATOM   | 172 | O   | PHE | A | 32 | 12.827 | 14.861 | 3.133  | 1.00 | 44.92 |     |
| O      |     |     |     |   |    |        |        |        |      |       |     |
| ANISOU | 172 | O   | PHE | A | 32 | 6086   | 5482   | 5501   | 2124 | 184   | 345 |
| ATOM   | 173 | CB  | PHE | A | 32 | 14.739 | 16.974 | 4.803  | 1.00 | 43.66 |     |
| C      |     |     |     |   |    |        |        |        |      |       |     |
| ANISOU | 173 | CB  | PHE | A | 32 | 6035   | 5037   | 5515   | 1920 | 749   | 338 |
| ATOM   | 174 | CG  | PHE | A | 32 | 15.744 | 18.053 | 4.467  | 1.00 | 45.91 |     |
| C      |     |     |     |   |    |        |        |        |      |       |     |
| ANISOU | 174 | CG  | PHE | A | 32 | 6547   | 5069   | 5828   | 1933 | 983   | 390 |
| ATOM   | 175 | CD1 | PHE | A | 32 | 15.843 | 18.561 | 3.173  | 1.00 | 50.09 |     |
| C      |     |     |     |   |    |        |        |        |      |       |     |
| ANISOU | 175 | CD1 | PHE | A | 32 | 7394   | 5416   | 6223   | 2101 | 1049  | 511 |
| ATOM   | 176 | CD2 | PHE | A | 32 | 16.633 | 18.520 | 5.429  | 1.00 | 47.57 |     |
| C      |     |     |     |   |    |        |        |        |      |       |     |
| ANISOU | 176 | CD2 | PHE | A | 32 | 6684   | 5188   | 6203   | 1775 | 1142  | 307 |

|        |     |     |     |   |    |        |        |       |      |       |      |
|--------|-----|-----|-----|---|----|--------|--------|-------|------|-------|------|
| ATOM C | 177 | CE1 | PHE | A | 32 | 16.796 | 19.531 | 2.855 | 1.00 | 52.42 |      |
| ANISOU | 177 | CE1 | PHE | A | 32 | 7911   | 5430   | 6574  | 2094 | 1344  | 559  |
| ATOM C | 178 | CE2 | PHE | A | 32 | 17.585 | 19.492 | 5.111 | 1.00 | 52.02 |      |
| ANISOU | 178 | CE2 | PHE | A | 32 | 7410   | 5483   | 6871  | 1765 | 1383  | 328  |
| ATOM C | 179 | CZ  | PHE | A | 32 | 17.658 | 19.993 | 3.827 | 1.00 | 51.80 |      |
| ANISOU | 179 | CZ  | PHE | A | 32 | 7680   | 5266   | 6735  | 1915 | 1519  | 459  |
| ATOM H | 180 | H   | PHE | A | 32 | 12.827 | 18.603 | 5.288 | 1.00 | 0.00  |      |
| ATOM H | 181 | HA  | PHE | A | 32 | 13.639 | 17.208 | 2.971 | 1.00 | 0.00  |      |
| ATOM H | 182 | HB3 | PHE | A | 32 | 15.208 | 15.997 | 4.684 | 1.00 | 0.00  |      |
| ATOM H | 183 | HB2 | PHE | A | 32 | 14.525 | 17.003 | 5.871 | 1.00 | 0.00  |      |
| ATOM H | 184 | HD1 | PHE | A | 32 | 15.177 | 18.205 | 2.401 | 1.00 | 0.00  |      |
| ATOM H | 185 | HD2 | PHE | A | 32 | 16.593 | 18.131 | 6.436 | 1.00 | 0.00  |      |
| ATOM H | 186 | HE1 | PHE | A | 32 | 16.857 | 19.918 | 1.849 | 1.00 | 0.00  |      |
| ATOM H | 187 | HE2 | PHE | A | 32 | 18.264 | 19.852 | 5.870 | 1.00 | 0.00  |      |
| ATOM H | 188 | HZ  | PHE | A | 32 | 18.391 | 20.748 | 3.584 | 1.00 | 0.00  |      |
| ATOM N | 189 | N   | LEU | A | 33 | 12.031 | 15.349 | 5.195 | 1.00 | 43.50 |      |
| ANISOU | 189 | N   | LEU | A | 33 | 5510   | 5408   | 5608  | 2005 | 330   | 199  |
| ATOM C | 190 | CA  | LEU | A | 33 | 11.349 | 14.076 | 5.434 | 1.00 | 43.41 |      |
| ANISOU | 190 | CA  | LEU | A | 33 | 5258   | 5562   | 5673  | 1919 | 209   | 122  |
| ATOM C | 191 | C   | LEU | A | 33 | 10.193 | 13.820 | 4.482 | 1.00 | 49.53 |      |
| ANISOU | 191 | C   | LEU | A | 33 | 5932   | 6366   | 6521  | 2114 | -75   | 88   |
| ATOM O | 192 | O   | LEU | A | 33 | 10.073 | 12.705 | 3.983 | 1.00 | 49.13 |      |
| ANISOU | 192 | O   | LEU | A | 33 | 5814   | 6402   | 6451  | 2067 | -234  | 61   |
| ATOM C | 193 | CB  | LEU | A | 33 | 10.896 | 13.954 | 6.900 | 1.00 | 43.57 |      |
| ANISOU | 193 | CB  | LEU | A | 33 | 5070   | 5641   | 5845  | 1788 | 380   | 21   |
| ATOM C | 194 | CG  | LEU | A | 33 | 10.352 | 12.588 | 7.330 | 1.00 | 48.06 |      |
| ANISOU | 194 | CG  | LEU | A | 33 | 5438   | 6333   | 6488  | 1639 | 372   | -50  |
| ATOM C | 195 | CD1 | LEU | A | 33 | 11.466 | 11.577 | 7.502 | 1.00 | 45.84 |      |
| ANISOU | 195 | CD1 | LEU | A | 33 | 5287   | 6089   | 6041  | 1444 | 409   | -7   |
| ATOM C | 196 | CD2 | LEU | A | 33 | 9.564  | 12.705 | 8.591 | 1.00 | 51.67 |      |
| ANISOU | 196 | CD2 | LEU | A | 33 | 5725   | 6785   | 7122  | 1586 | 579   | -153 |
| ATOM H | 197 | H   | LEU | A | 33 | 11.943 | 16.041 | 5.925 | 1.00 | 0.00  |      |
| ATOM H | 198 | HA  | LEU | A | 33 | 12.081 | 13.287 | 5.262 | 1.00 | 0.00  |      |
| ATOM H | 199 | HB3 | LEU | A | 33 | 10.150 | 14.720 | 7.110 | 1.00 | 0.00  |      |

|          |     |      |     |   |    |        |        |       |      |       |      |
|----------|-----|------|-----|---|----|--------|--------|-------|------|-------|------|
| ATOM H   | 200 | HB2  | LEU | A | 33 | 11.720 | 14.235 | 7.555 | 1.00 | 0.00  |      |
| ATOM H   | 201 | HG   | LEU | A | 33 | 9.685  | 12.227 | 6.547 | 1.00 | 0.00  |      |
| ATOM H   | 202 | HD11 | LEU | A | 33 | 11.044 | 10.619 | 7.807 | 1.00 | 0.00  |      |
| ATOM H   | 203 | HD12 | LEU | A | 33 | 11.996 | 11.455 | 6.557 | 1.00 | 0.00  |      |
| ATOM H   | 204 | HD13 | LEU | A | 33 | 12.161 | 11.927 | 8.265 | 1.00 | 0.00  |      |
| ATOM H   | 205 | HD21 | LEU | A | 33 | 9.188  | 11.723 | 8.877 | 1.00 | 0.00  |      |
| ATOM H   | 206 | HD22 | LEU | A | 33 | 10.202 | 13.094 | 9.384 | 1.00 | 0.00  |      |
| ATOM H   | 207 | HD23 | LEU | A | 33 | 8.725  | 13.383 | 8.434 | 1.00 | 0.00  |      |
| ATOM N   | 208 | N    | ARG | A | 34 | 9.350  | 14.847 | 4.222 | 1.00 | 48.64 |      |
| ANISOU   | 208 | N    | ARG | A | 34 | 5807   | 6163   | 6511  | 2344 | -171  | 74   |
| ATOM C   | 209 | CA   | ARG | A | 34 | 8.214  | 14.744 | 3.302 | 1.00 | 51.09 |      |
| ANISOU   | 209 | CA   | ARG | A | 34 | 6022   | 6457   | 6932  | 2582 | -528  | 13   |
| ATOM C   | 210 | C    | ARG | A | 34 | 8.677  | 14.379 | 1.898 | 1.00 | 56.22 |      |
| ANISOU   | 210 | C    | ARG | A | 34 | 7015   | 7056   | 7289  | 2698 | -768  | 102  |
| ATOM O   | 211 | O    | ARG | A | 34 | 8.040  | 13.548 | 1.247 | 1.00 | 57.72 |      |
| ANISOU   | 211 | O    | ARG | A | 34 | 7108   | 7299   | 7526  | 2766 | -1080 | 22   |
| ATOM C   | 212 | CB   | ARG | A | 34 | 7.425  | 16.062 | 3.252 | 1.00 | 52.66 |      |
| ANISOU   | 212 | CB   | ARG | A | 34 | 6208   | 6524   | 7277  | 2834 | -593  | -3   |
| ATOM C   | 213 | CG   | ARG | A | 34 | 6.287  | 16.144 | 4.253 | 1.00 | 60.62 |      |
| ANISOU   | 213 | CG   | ARG | A | 34 | 6758   | 7567   | 8709  | 2836 | -553  | -173 |
| ATOM C   | 214 | CD   | ARG | A | 34 | 5.335  | 17.301 | 3.944 | 1.00 | 69.11 |      |
| ANISOU   | 214 | CD   | ARG | A | 34 | 7782   | 8493   | 9983  | 3150 | -748  | -214 |
| ATOM N   | 215 | NE   | ARG | A | 34 | 6.045  | 18.530 | 3.566 | 1.00 | 72.91 |      |
| ANISOU   | 215 | NE   | ARG | A | 34 | 8672   | 8828   | 10204 | 3274 | -645  | -58  |
| ATOM C   | 216 | CZ   | ARG | A | 34 | 6.510  | 19.428 | 4.429 | 1.00 | 85.28 |      |
| ANISOU   | 216 | CZ   | ARG | A | 34 | 10275  | 10338  | 11789 | 3189 | -292  | -32  |
| ATOM N   | 217 | NH1  | ARG | A | 34 | 6.330  | 19.262 | 5.734 | 1.00 | 74.70 |      |
| ANISOU   | 217 | NH1  | ARG | A | 34 | 8641   | 9073   | 10668 | 2995 | -12   | -144 |
| ATOM N1+ | 218 | NH2  | ARG | A | 34 | 7.153  | 20.503 | 3.993 | 1.00 | 69.44 |      |
| ANISOU   | 218 | NH2  | ARG | A | 34 | 8636   | 8171   | 9576  | 3298 | -202  | 99   |
| ATOM H   | 219 | H    | ARG | A | 34 | 9.489  | 15.741 | 4.672 | 1.00 | 0.00  |      |
| ATOM H   | 220 | HA   | ARG | A | 34 | 7.550  | 13.958 | 3.661 | 1.00 | 0.00  |      |
| ATOM H   | 221 | HB3  | ARG | A | 34 | 7.033  | 16.210 | 2.246 | 1.00 | 0.00  |      |
| ATOM H   | 222 | HB2  | ARG | A | 34 | 8.107  | 16.897 | 3.411 | 1.00 | 0.00  |      |

|        |     |      |     |   |    |        |        |        |      |        |     |
|--------|-----|------|-----|---|----|--------|--------|--------|------|--------|-----|
| ATOM H | 223 | HG3  | ARG | A | 34 | 6.695  | 16.268 | 5.256  | 1.00 | 0.00   |     |
| ATOM H | 224 | HG2  | ARG | A | 34 | 5.731  | 15.206 | 4.248  | 1.00 | 0.00   |     |
| ATOM H | 225 | HD3  | ARG | A | 34 | 4.709  | 17.497 | 4.814  | 1.00 | 0.00   |     |
| ATOM H | 226 | HD2  | ARG | A | 34 | 4.661  | 17.010 | 3.139  | 1.00 | 0.00   |     |
| ATOM H | 227 | HE   | ARG | A | 34 | 6.171  | 18.671 | 2.574  | 1.00 | 0.00   |     |
| ATOM H | 228 | HH12 | ARG | A | 34 | 6.686  | 19.948 | 6.384  | 1.00 | 0.00   |     |
| ATOM H | 229 | HH11 | ARG | A | 34 | 5.837  | 18.450 | 6.077  | 1.00 | 0.00   |     |
| ATOM H | 230 | HH22 | ARG | A | 34 | 7.505  | 21.183 | 4.652  | 1.00 | 0.00   |     |
| ATOM H | 231 | HH21 | ARG | A | 34 | 7.291  | 20.642 | 3.002  | 1.00 | 0.00   |     |
| ATOM N | 232 | N    | GLN | A | 35 | 9.780  | 15.008 | 1.437  | 1.00 | 52.13  |     |
| ANISOU | 232 | N    | GLN | A | 35 | 6912   | 6407   | 6489   | 2714 | -598   | 252 |
| ATOM C | 233 | CA   | GLN | A | 35 | 10.376 | 14.778 | 0.119  | 1.00 | 53.40  |     |
| ANISOU | 233 | CA   | GLN | A | 35 | 7505   | 6459   | 6324   | 2817 | -705   | 356 |
| ATOM C | 234 | C    | GLN | A | 35 | 10.900 | 13.343 | 0.005  | 1.00 | 55.07  |     |
| ANISOU | 234 | C    | GLN | A | 35 | 7653   | 6799   | 6474   | 2607 | -705   | 328 |
| ATOM O | 235 | O    | GLN | A | 35 | 10.761 | 12.724 | -1.052 | 1.00 | 56.19  |     |
| ANISOU | 235 | O    | GLN | A | 35 | 8000   | 6915   | 6435   | 2713 | -948   | 328 |
| ATOM C | 236 | CB   | GLN | A | 35 | 11.516 | 15.774 | -0.139 | 1.00 | 54.81  |     |
| ANISOU | 236 | CB   | GLN | A | 35 | 8090   | 6431   | 6306   | 2822 | -379   | 506 |
| ATOM C | 237 | CG   | GLN | A | 35 | 11.065 | 17.156 | -0.576 | 1.00 | 80.01  |     |
| ANISOU | 237 | CG   | GLN | A | 35 | 11530  | 9424   | 9446   | 3100 | -423   | 572 |
| ATOM C | 238 | CD   | GLN | A | 35 | 12.255 | 18.023 | -0.897 | 1.00 | 108.67 |     |
| ANISOU | 238 | CD   | GLN | A | 35 | 15552  | 12819  | 12921  | 3065 | -31    | 711 |
| ATOM O | 239 | OE1  | GLN | A | 35 | 12.537 | 18.198 | -2.181 | 1.00 | 103.96 |     |
| ANISOU | 239 | OE1  | GLN | A | 35 | 14802  | 12201  | 12496  | 2898 | 273    | 698 |
| ATOM N | 240 | NE2  | GLN | A | 35 | 12.944 | 18.532 | -0.006 | 1.00 | 106.66 |     |
| ANISOU | 240 | NE2  | GLN | A | 35 | 15823  | 12357  | 12347  | 3205 | -5     | 830 |
| ATOM H | 241 | H    | GLN | A | 35 | 10.251 | 15.690 | 2.015  | 1.00 | 0.00   |     |
| ATOM H | 242 | HA   | GLN | A | 35 | 9.607  | 14.927 | -0.639 | 1.00 | 0.00   |     |
| ATOM H | 243 | HB3  | GLN | A | 35 | 12.193 | 15.362 | -0.888 | 1.00 | 0.00   |     |
| ATOM H | 244 | HB2  | GLN | A | 35 | 12.129 | 15.861 | 0.758  | 1.00 | 0.00   |     |
| ATOM H | 245 | HG3  | GLN | A | 35 | 10.484 | 17.618 | 0.223  | 1.00 | 0.00   |     |
| ATOM H | 246 | HG2  | GLN | A | 35 | 10.431 | 17.069 | -1.458 | 1.00 | 0.00   |     |

|        |     |      |     |   |    |        |        |        |      |           |
|--------|-----|------|-----|---|----|--------|--------|--------|------|-----------|
| ATOM   | 247 | HE22 | GLN | A | 35 | 13.737 | 19.109 | -0.248 | 1.00 | 0.00      |
| H      |     |      |     |   |    |        |        |        |      |           |
| ATOM   | 248 | HE21 | GLN | A | 35 | 12.714 | 18.371 | 0.964  | 1.00 | 0.00      |
| H      |     |      |     |   |    |        |        |        |      |           |
| ATOM   | 249 | N    | LEU | A | 36 | 11.483 | 12.814 | 1.099  | 1.00 | 48.17     |
| N      |     |      |     |   |    |        |        |        |      |           |
| ANISOU | 249 | N    | LEU | A | 36 | 6521   | 6044   | 5736   | 2327 | -456 295  |
| ATOM   | 250 | CA   | LEU | A | 36 | 12.005 | 11.444 | 1.148  | 1.00 | 45.82     |
| C      |     |      |     |   |    |        |        |        |      |           |
| ANISOU | 250 | CA   | LEU | A | 36 | 6135   | 5859   | 5414   | 2116 | -434 268  |
| ATOM   | 251 | C    | LEU | A | 36 | 10.881 | 10.421 | 1.163  | 1.00 | 50.74     |
| C      |     |      |     |   |    |        |        |        |      |           |
| ANISOU | 251 | C    | LEU | A | 36 | 6454   | 6627   | 6198   | 2114 | -706 137  |
| ATOM   | 252 | O    | LEU | A | 36 | 10.969 | 9.417  | 0.452  | 1.00 | 50.62     |
| O      |     |      |     |   |    |        |        |        |      |           |
| ANISOU | 252 | O    | LEU | A | 36 | 6509   | 6643   | 6080   | 2090 | -857 119  |
| ATOM   | 253 | CB   | LEU | A | 36 | 12.918 | 11.249 | 2.370  | 1.00 | 43.28     |
| C      |     |      |     |   |    |        |        |        |      |           |
| ANISOU | 253 | CB   | LEU | A | 36 | 5671   | 5584   | 5188   | 1857 | -139 267  |
| ATOM   | 254 | CG   | LEU | A | 36 | 14.227 | 12.025 | 2.342  | 1.00 | 47.53     |
| C      |     |      |     |   |    |        |        |        |      |           |
| ANISOU | 254 | CG   | LEU | A | 36 | 6450   | 5958   | 5650   | 1807 | 126 355   |
| ATOM   | 255 | CD1  | LEU | A | 36 | 14.901 | 12.016 | 3.697  | 1.00 | 45.91     |
| C      |     |      |     |   |    |        |        |        |      |           |
| ANISOU | 255 | CD1  | LEU | A | 36 | 6073   | 5783   | 5590   | 1601 | 305 307   |
| ATOM   | 256 | CD2  | LEU | A | 36 | 15.136 | 11.531 | 1.253  | 1.00 | 51.12     |
| C      |     |      |     |   |    |        |        |        |      |           |
| ANISOU | 256 | CD2  | LEU | A | 36 | 7172   | 6312   | 5939   | 1792 | 182 422   |
| ATOM   | 257 | H    | LEU | A | 36 | 11.577 | 13.367 | 1.939  | 1.00 | 0.00      |
| H      |     |      |     |   |    |        |        |        |      |           |
| ATOM   | 258 | HA   | LEU | A | 36 | 12.601 | 11.277 | 0.251  | 1.00 | 0.00      |
| H      |     |      |     |   |    |        |        |        |      |           |
| ATOM   | 259 | HB3  | LEU | A | 36 | 13.131 | 10.187 | 2.494  | 1.00 | 0.00      |
| H      |     |      |     |   |    |        |        |        |      |           |
| ATOM   | 260 | HB2  | LEU | A | 36 | 12.367 | 11.504 | 3.275  | 1.00 | 0.00      |
| H      |     |      |     |   |    |        |        |        |      |           |
| ATOM   | 261 | HG   | LEU | A | 36 | 13.982 | 13.062 | 2.111  | 1.00 | 0.00      |
| H      |     |      |     |   |    |        |        |        |      |           |
| ATOM   | 262 | HD11 | LEU | A | 36 | 15.833 | 12.579 | 3.643  | 1.00 | 0.00      |
| H      |     |      |     |   |    |        |        |        |      |           |
| ATOM   | 263 | HD12 | LEU | A | 36 | 14.242 | 12.475 | 4.434  | 1.00 | 0.00      |
| H      |     |      |     |   |    |        |        |        |      |           |
| ATOM   | 264 | HD13 | LEU | A | 36 | 15.114 | 10.988 | 3.991  | 1.00 | 0.00      |
| H      |     |      |     |   |    |        |        |        |      |           |
| ATOM   | 265 | HD21 | LEU | A | 36 | 16.061 | 12.107 | 1.262  | 1.00 | 0.00      |
| H      |     |      |     |   |    |        |        |        |      |           |
| ATOM   | 266 | HD22 | LEU | A | 36 | 15.363 | 10.478 | 1.418  | 1.00 | 0.00      |
| H      |     |      |     |   |    |        |        |        |      |           |
| ATOM   | 267 | HD23 | LEU | A | 36 | 14.644 | 11.649 | 0.287  | 1.00 | 0.00      |
| H      |     |      |     |   |    |        |        |        |      |           |
| ATOM   | 268 | N    | GLN | A | 37 | 9.813  | 10.689 | 1.956  | 1.00 | 48.25     |
| N      |     |      |     |   |    |        |        |        |      |           |
| ANISOU | 268 | N    | GLN | A | 37 | 5795   | 6371   | 6167   | 2135 | -743 31   |
| ATOM   | 269 | CA   | GLN | A | 37 | 8.638  | 9.820  | 2.091  | 1.00 | 49.14     |
| C      |     |      |     |   |    |        |        |        |      |           |
| ANISOU | 269 | CA   | GLN | A | 37 | 5539   | 6576   | 6554   | 2120 | -944 -128 |

|        |     |      |     |   |    |       |        |        |      |       |      |
|--------|-----|------|-----|---|----|-------|--------|--------|------|-------|------|
| ATOM C | 270 | C    | GLN | A | 37 | 7.863 | 9.657  | 0.785  | 1.00 | 56.19 |      |
| ANISOU | 270 | C    | GLN | A | 37 | 6496  | 7418   | 7435   | 2364 | -1398 | -198 |
| ATOM O | 271 | O    | GLN | A | 37 | 7.202 | 8.631  | 0.608  | 1.00 | 57.07 |      |
| ANISOU | 271 | O    | GLN | A | 37 | 6362  | 7591   | 7732   | 2322 | -1604 | -335 |
| ATOM C | 272 | CB   | GLN | A | 37 | 7.722 | 10.272 | 3.242  | 1.00 | 51.04 |      |
| ANISOU | 272 | CB   | GLN | A | 37 | 5412  | 6833   | 7146   | 2088 | -790  | -234 |
| ATOM C | 273 | CG   | GLN | A | 37 | 8.314 | 9.975  | 4.622  | 1.00 | 56.82 |      |
| ANISOU | 273 | CG   | GLN | A | 37 | 6094  | 7618   | 7876   | 1824 | -397  | -208 |
| ATOM C | 274 | CD   | GLN | A | 37 | 7.285 | 9.567  | 5.650  | 1.00 | 70.86 |      |
| ANISOU | 274 | CD   | GLN | A | 37 | 7507  | 9417   | 9998   | 1718 | -225  | -349 |
| ATOM O | 275 | OE1  | GLN | A | 37 | 7.003 | 10.302 | 6.601  | 1.00 | 64.03 |      |
| ANISOU | 275 | OE1  | GLN | A | 37 | 6578  | 8502   | 9250   | 1713 | 17    | -375 |
| ATOM N | 276 | NE2  | GLN | A | 37 | 6.754 | 8.355  | 5.528  | 1.00 | 58.58 |      |
| ANISOU | 276 | NE2  | GLN | A | 37 | 5732  | 7912   | 8611   | 1612 | -289  | -445 |
| ATOM H | 277 | H    | GLN | A | 37 | 9.792 | 11.536 | 2.505  | 1.00 | 0.00  |      |
| ATOM H | 278 | HA   | GLN | A | 37 | 9.010 | 8.831  | 2.358  | 1.00 | 0.00  |      |
| ATOM H | 279 | HB3  | GLN | A | 37 | 6.754 | 9.779  | 3.149  | 1.00 | 0.00  |      |
| ATOM H | 280 | HB2  | GLN | A | 37 | 7.529 | 11.341 | 3.153  | 1.00 | 0.00  |      |
| ATOM H | 281 | HG3  | GLN | A | 37 | 8.855 | 10.851 | 4.980  | 1.00 | 0.00  |      |
| ATOM H | 282 | HG2  | GLN | A | 37 | 9.066 | 9.191  | 4.532  | 1.00 | 0.00  |      |
| ATOM H | 283 | HE22 | GLN | A | 37 | 6.062 | 8.038  | 6.192  | 1.00 | 0.00  |      |
| ATOM H | 284 | HE21 | GLN | A | 37 | 7.043 | 7.751  | 4.772  | 1.00 | 0.00  |      |
| ATOM N | 285 | N    | ARG | A | 38 | 7.979 | 10.643 | -0.144 | 1.00 | 54.52 |      |
| ANISOU | 285 | N    | ARG | A | 38 | 6655  | 7067   | 6993   | 2624 | -1562 | -110 |
| ATOM C | 286 | CA   | ARG | A | 38 | 7.349 | 10.610 | -1.472 | 1.00 | 57.74 |      |
| ANISOU | 286 | CA   | ARG | A | 38 | 7280  | 7377   | 7284   | 2911 | -2047 | -160 |
| ATOM C | 287 | C    | ARG | A | 38 | 7.917 | 9.455  | -2.301 | 1.00 | 60.41 |      |
| ANISOU | 287 | C    | ARG | A | 38 | 7876  | 7732   | 7346   | 2838 | -2151 | -145 |
| ATOM O | 288 | O    | ARG | A | 38 | 7.200 | 8.881  | -3.122 | 1.00 | 62.50 |      |
| ANISOU | 288 | O    | ARG | A | 38 | 8164  | 7968   | 7614   | 2991 | -2592 | -267 |
| ATOM C | 289 | CB   | ARG | A | 38 | 7.566 | 11.931 | -2.229 | 1.00 | 60.38 |      |
| ANISOU | 289 | CB   | ARG | A | 38 | 8090  | 7514   | 7336   | 3197 | -2113 | -26  |
| ATOM C | 290 | CG   | ARG | A | 38 | 6.650 | 13.066 | -1.798 | 1.00 | 76.59 |      |
| ANISOU | 290 | CG   | ARG | A | 38 | 9916  | 9505   | 9678   | 3386 | -2209 | -83  |
| ATOM C | 291 | CD   | ARG | A | 38 | 6.556 | 14.121 | -2.883 | 1.00 | 93.62 |      |

|        |     |      |     |   |    |        |        |        |            |       |      |
|--------|-----|------|-----|---|----|--------|--------|--------|------------|-------|------|
| ANISOU | 291 | CD   | ARG | A | 38 | 12593  | 11434  | 11546  | 3751       | -2459 | 18   |
| ATOM   | 292 | NE   | ARG | A | 38 | 5.979  | 15.373 | -2.390 | 1.00107.71 |       |      |
| N      |     |      |     |   |    |        |        |        |            |       |      |
| ANISOU | 292 | NE   | ARG | A | 38 | 14231  | 13135  | 13560  | 3902       | -2415 | 14   |
| ATOM   | 293 | CZ   | ARG | A | 38 | 6.692  | 16.431 | -2.015 | 1.00124.93 |       |      |
| C      |     |      |     |   |    |        |        |        |            |       |      |
| ANISOU | 293 | CZ   | ARG | A | 38 | 16670  | 15212  | 15588  | 3889       | -2039 | 174  |
| ATOM   | 294 | NH1  | ARG | A | 38 | 6.084  | 17.528 | -1.584 | 1.00115.87 |       |      |
| N      |     |      |     |   |    |        |        |        |            |       |      |
| ANISOU | 294 | NH1  | ARG | A | 38 | 15373  | 13981  | 14670  | 4035       | -2021 | 153  |
| ATOM   | 295 | NH2  | ARG | A | 38 | 8.018  | 16.402 | -2.070 | 1.00110.79 |       |      |
| N1+    |     |      |     |   |    |        |        |        |            |       |      |
| ANISOU | 295 | NH2  | ARG | A | 38 | 15265  | 13373  | 13456  | 3730       | -1671 | 339  |
| ATOM   | 296 | H    | ARG | A | 38 | 8.527  | 11.467 | 0.059  | 1.00       | 0.00  |      |
| H      |     |      |     |   |    |        |        |        |            |       |      |
| ATOM   | 297 | HA   | ARG | A | 38 | 6.278  | 10.453 | -1.345 | 1.00       | 0.00  |      |
| H      |     |      |     |   |    |        |        |        |            |       |      |
| ATOM   | 298 | HB3  | ARG | A | 38 | 7.447  | 11.758 | -3.299 | 1.00       | 0.00  |      |
| H      |     |      |     |   |    |        |        |        |            |       |      |
| ATOM   | 299 | HB2  | ARG | A | 38 | 8.604  | 12.244 | -2.119 | 1.00       | 0.00  |      |
| H      |     |      |     |   |    |        |        |        |            |       |      |
| ATOM   | 300 | HG3  | ARG | A | 38 | 7.037  | 13.518 | -0.885 | 1.00       | 0.00  |      |
| H      |     |      |     |   |    |        |        |        |            |       |      |
| ATOM   | 301 | HG2  | ARG | A | 38 | 5.656  | 12.671 | -1.589 | 1.00       | 0.00  |      |
| H      |     |      |     |   |    |        |        |        |            |       |      |
| ATOM   | 302 | HD3  | ARG | A | 38 | 5.950  | 13.742 | -3.706 | 1.00       | 0.00  |      |
| H      |     |      |     |   |    |        |        |        |            |       |      |
| ATOM   | 303 | HD2  | ARG | A | 38 | 7.549  | 14.314 | -3.288 | 1.00       | 0.00  |      |
| H      |     |      |     |   |    |        |        |        |            |       |      |
| ATOM   | 304 | HE   | ARG | A | 38 | 4.970  | 15.402 | -2.344 | 1.00       | 0.00  |      |
| H      |     |      |     |   |    |        |        |        |            |       |      |
| ATOM   | 305 | HH12 | ARG | A | 38 | 6.629  | 18.329 | -1.300 | 1.00       | 0.00  |      |
| H      |     |      |     |   |    |        |        |        |            |       |      |
| ATOM   | 306 | HH11 | ARG | A | 38 | 5.076  | 17.562 | -1.540 | 1.00       | 0.00  |      |
| H      |     |      |     |   |    |        |        |        |            |       |      |
| ATOM   | 307 | HH22 | ARG | A | 38 | 8.553  | 17.209 | -1.784 | 1.00       | 0.00  |      |
| H      |     |      |     |   |    |        |        |        |            |       |      |
| ATOM   | 308 | HH21 | ARG | A | 38 | 8.492  | 15.573 | -2.398 | 1.00       | 0.00  |      |
| H      |     |      |     |   |    |        |        |        |            |       |      |
| ATOM   | 309 | N    | LYS | A | 39 | 9.198  | 9.103  | -2.062 | 1.00       | 53.76 |      |
| N      |     |      |     |   |    |        |        |        |            |       |      |
| ANISOU | 309 | N    | LYS | A | 39 | 7211   | 6918   | 6299   | 2610       | -1761 | -16  |
| ATOM   | 310 | CA   | LYS | A | 39 | 9.890  | 8.009  | -2.749 | 1.00       | 52.75 |      |
| C      |     |      |     |   |    |        |        |        |            |       |      |
| ANISOU | 310 | CA   | LYS | A | 39 | 7320   | 6791   | 5930   | 2512       | -1763 | 6    |
| ATOM   | 311 | C    | LYS | A | 39 | 9.471  | 6.612  | -2.249 | 1.00       | 54.70 |      |
| C      |     |      |     |   |    |        |        |        |            |       |      |
| ANISOU | 311 | C    | LYS | A | 39 | 7146   | 7201   | 6435   | 2299       | -1833 | -138 |
| ATOM   | 312 | O    | LYS | A | 39 | 9.830  | 5.613  | -2.870 | 1.00       | 54.60 |      |
| O      |     |      |     |   |    |        |        |        |            |       |      |
| ANISOU | 312 | O    | LYS | A | 39 | 7287   | 7191   | 6267   | 2236       | -1904 | -155 |
| ATOM   | 313 | CB   | LYS | A | 39 | 11.422 | 8.194  | -2.695 | 1.00       | 53.17 |      |
| C      |     |      |     |   |    |        |        |        |            |       |      |
| ANISOU | 313 | CB   | LYS | A | 39 | 7686   | 6766   | 5749   | 2367       | -1314 | 176  |
| ATOM   | 314 | CG   | LYS | A | 39 | 11.945 | 9.521  | -3.282 | 1.00       | 67.82 |      |
| C      |     |      |     |   |    |        |        |        |            |       |      |
| ANISOU | 314 | CG   | LYS | A | 39 | 10016  | 8403   | 7349   | 2559       | -1169 | 323  |

|        |     |     |     |   |    |        |        |        |      |        |      |
|--------|-----|-----|-----|---|----|--------|--------|--------|------|--------|------|
| ATOM   | 315 | CD  | LYS | A | 39 | 11.622 | 9.745  | -4.774 | 1.00 | 84.12  |      |
| C      |     |     |     |   |    |        |        |        |      |        |      |
| ANISOU | 315 | CD  | LYS | A | 39 | 12628  | 10280  | 9053   | 2868 | -1476  | 351  |
| ATOM   | 316 | CE  | LYS | A | 39 | 12.506 | 8.979  | -5.733 | 1.00 | 95.87  |      |
| C      |     |     |     |   |    |        |        |        |      |        |      |
| ANISOU | 316 | CE  | LYS | A | 39 | 14555  | 11656  | 10214  | 2826 | -1355  | 404  |
| ATOM   | 317 | NZ  | LYS | A | 39 | 12.087 | 9.193  | -7.144 | 1.00 | 108.27 |      |
| N1+    |     |     |     |   |    |        |        |        |      |        |      |
| ANISOU | 317 | NZ  | LYS | A | 39 | 16741  | 13021  | 11378  | 3154 | -1687  | 421  |
| ATOM   | 318 | H   | LYS | A | 39 | 9.740  | 9.605  | -1.373 | 1.00 | 0.00   |      |
| H      |     |     |     |   |    |        |        |        |      |        |      |
| ATOM   | 319 | HA  | LYS | A | 39 | 9.603  | 8.066  | -3.799 | 1.00 | 0.00   |      |
| H      |     |     |     |   |    |        |        |        |      |        |      |
| ATOM   | 320 | HB3 | LYS | A | 39 | 11.904 | 7.360  | -3.205 | 1.00 | 0.00   |      |
| H      |     |     |     |   |    |        |        |        |      |        |      |
| ATOM   | 321 | HB2 | LYS | A | 39 | 11.760 | 8.098  | -1.663 | 1.00 | 0.00   |      |
| H      |     |     |     |   |    |        |        |        |      |        |      |
| ATOM   | 322 | HG3 | LYS | A | 39 | 13.023 | 9.581  | -3.134 | 1.00 | 0.00   |      |
| H      |     |     |     |   |    |        |        |        |      |        |      |
| ATOM   | 323 | HG2 | LYS | A | 39 | 11.551 | 10.353 | -2.699 | 1.00 | 0.00   |      |
| H      |     |     |     |   |    |        |        |        |      |        |      |
| ATOM   | 324 | HD3 | LYS | A | 39 | 11.682 | 10.810 | -5.000 | 1.00 | 0.00   |      |
| H      |     |     |     |   |    |        |        |        |      |        |      |
| ATOM   | 325 | HD2 | LYS | A | 39 | 10.579 | 9.487  | -4.960 | 1.00 | 0.00   |      |
| H      |     |     |     |   |    |        |        |        |      |        |      |
| ATOM   | 326 | HE3 | LYS | A | 39 | 12.460 | 7.916  | -5.498 | 1.00 | 0.00   |      |
| H      |     |     |     |   |    |        |        |        |      |        |      |
| ATOM   | 327 | HE2 | LYS | A | 39 | 13.540 | 9.301  | -5.609 | 1.00 | 0.00   |      |
| H      |     |     |     |   |    |        |        |        |      |        |      |
| ATOM   | 328 | HZ1 | LYS | A | 39 | 12.147 | 10.176 | -7.368 | 1.00 | 0.00   |      |
| H      |     |     |     |   |    |        |        |        |      |        |      |
| ATOM   | 329 | HZ2 | LYS | A | 39 | 12.694 | 8.670  | -7.759 | 1.00 | 0.00   |      |
| H      |     |     |     |   |    |        |        |        |      |        |      |
| ATOM   | 330 | HZ3 | LYS | A | 39 | 11.135 | 8.878  | -7.264 | 1.00 | 0.00   |      |
| H      |     |     |     |   |    |        |        |        |      |        |      |
| ATOM   | 331 | N   | ASP | A | 40 | 8.687  | 6.539  | -1.159 | 1.00 | 49.96  |      |
| N      |     |     |     |   |    |        |        |        |      |        |      |
| ANISOU | 331 | N   | ASP | A | 40 | 6045   | 6708   | 6229   | 2191 | -1783  | -246 |
| ATOM   | 332 | CA  | ASP | A | 40 | 8.200  | 5.272  | -0.607 | 1.00 | 48.81  |      |
| C      |     |     |     |   |    |        |        |        |      |        |      |
| ANISOU | 332 | CA  | ASP | A | 40 | 5495   | 6675   | 6375   | 1986 | -1786  | -386 |
| ATOM   | 333 | C   | ASP | A | 40 | 6.648  | 5.280  | -0.588 | 1.00 | 56.15  |      |
| C      |     |     |     |   |    |        |        |        |      |        |      |
| ANISOU | 333 | C   | ASP | A | 40 | 6002   | 7596   | 7738   | 2109 | -2097  | -600 |
| ATOM   | 334 | O   | ASP | A | 40 | 6.059  | 5.430  | 0.485  | 1.00 | 55.65  |      |
| O      |     |     |     |   |    |        |        |        |      |        |      |
| ANISOU | 334 | O   | ASP | A | 40 | 5558   | 7563   | 8023   | 2010 | -1883  | -667 |
| ATOM   | 335 | CB  | ASP | A | 40 | 8.831  | 5.022  | 0.787  | 1.00 | 46.50  |      |
| C      |     |     |     |   |    |        |        |        |      |        |      |
| ANISOU | 335 | CB  | ASP | A | 40 | 5038   | 6463   | 6166   | 1706 | -1333  | -318 |
| ATOM   | 336 | CG  | ASP | A | 40 | 8.299  | 3.827  | 1.565  | 1.00 | 49.46  |      |
| C      |     |     |     |   |    |        |        |        |      |        |      |
| ANISOU | 336 | CG  | ASP | A | 40 | 5040   | 6914   | 6837   | 1490 | -1239  | -440 |
| ATOM   | 337 | OD1 | ASP | A | 40 | 8.035  | 2.770  | 0.939  | 1.00 | 48.33  |      |
| O      |     |     |     |   |    |        |        |        |      |        |      |
| ANISOU | 337 | OD1 | ASP | A | 40 | 4839   | 6784   | 6739   | 1457 | -1443  | -534 |

|        |     |     |     |   |    |       |       |        |      |       |       |
|--------|-----|-----|-----|---|----|-------|-------|--------|------|-------|-------|
| ATOM   | 338 | OD2 | ASP | A | 40 | 8.125 | 3.956 | 2.793  | 1.00 | 53.51 |       |
| ANISOU | 338 | OD2 | ASP | A | 40 | 5355  | 7447  | 7528   | 1357 | -946  | -445  |
| ATOM   | 339 | H   | ASP | A | 40 | 8.407 | 7.383 | -0.681 | 1.00 | 0.00  |       |
| ATOM   | 340 | HA  | ASP | A | 40 | 8.524 | 4.470 | -1.271 | 1.00 | 0.00  |       |
| ATOM   | 341 | HB3 | ASP | A | 40 | 8.728 | 5.921 | 1.395  | 1.00 | 0.00  |       |
| ATOM   | 342 | HB2 | ASP | A | 40 | 9.912 | 4.929 | 0.681  | 1.00 | 0.00  |       |
| ATOM   | 343 | N   | PRO | A | 41 | 5.963 | 5.158 | -1.764 | 1.00 | 57.13 |       |
| ANISOU | 343 | N   | PRO | A | 41 | 6197  | 7646  | 7865   | 2339 | -2606 | -727  |
| ATOM   | 344 | CA  | PRO | A | 41 | 4.487 | 5.231 | -1.763 | 1.00 | 60.86 |       |
| ANISOU | 344 | CA  | PRO | A | 41 | 6205  | 8075  | 8846   | 2475 | -2949 | -969  |
| ATOM   | 345 | C   | PRO | A | 41 | 3.761 | 4.065 | -1.096 | 1.00 | 65.32 |       |
| ANISOU | 345 | C   | PRO | A | 41 | 6214  | 8693  | 9911   | 2238 | -2865 | -1172 |
| ATOM   | 346 | O   | PRO | A | 41 | 2.635 | 4.249 | -0.630 | 1.00 | 67.61 |       |
| ANISOU | 346 | O   | PRO | A | 41 | 6009  | 8935  | 10743  | 2261 | -2902 | -1359 |
| ATOM   | 347 | CB  | PRO | A | 41 | 4.135 | 5.342 | -3.248 | 1.00 | 66.31 |       |
| ANISOU | 347 | CB  | PRO | A | 41 | 7219  | 8643  | 9332   | 2801 | -3571 | -1046 |
| ATOM   | 348 | CG  | PRO | A | 41 | 5.258 | 4.682 | -3.946 | 1.00 | 68.71 |       |
| ANISOU | 348 | CG  | PRO | A | 41 | 8033  | 8957  | 9117   | 2729 | -3511 | -912  |
| ATOM   | 349 | CD  | PRO | A | 41 | 6.483 | 4.998 | -3.139 | 1.00 | 59.76 |       |
| ANISOU | 349 | CD  | PRO | A | 41 | 7056  | 7896  | 7753   | 2504 | -2901 | -674  |
| ATOM   | 350 | HA  | PRO | A | 41 | 4.187 | 6.154 | -1.267 | 1.00 | 0.00  |       |
| ATOM   | 351 | HB3 | PRO | A | 41 | 4.101 | 6.393 | -3.533 | 1.00 | 0.00  |       |
| ATOM   | 352 | HB2 | PRO | A | 41 | 3.215 | 4.791 | -3.443 | 1.00 | 0.00  |       |
| ATOM   | 353 | HG3 | PRO | A | 41 | 5.363 | 5.106 | -4.945 | 1.00 | 0.00  |       |
| ATOM   | 354 | HG2 | PRO | A | 41 | 5.097 | 3.604 | -3.952 | 1.00 | 0.00  |       |
| ATOM   | 355 | HD2 | PRO | A | 41 | 7.164 | 4.147 | -3.170 | 1.00 | 0.00  |       |
| ATOM   | 356 | HD3 | PRO | A | 41 | 6.903 | 5.945 | -3.478 | 1.00 | 0.00  |       |
| ATOM   | 357 | N   | HIS | A | 42 | 4.392 | 2.878 | -1.048 | 1.00 | 59.36 |       |
| ANISOU | 357 | N   | HIS | A | 42 | 5538  | 8007  | 9010   | 2012 | -2720 | -1142 |
| ATOM   | 358 | CA  | HIS | A | 42 | 3.791 | 1.690 | -0.436 | 1.00 | 60.08 |       |
| ANISOU | 358 | CA  | HIS | A | 42 | 5169  | 8119  | 9539   | 1769 | -2589 | -1315 |
| ATOM   | 359 | C   | HIS | A | 42 | 3.967 | 1.636 | 1.087  | 1.00 | 60.45 |       |
| ANISOU | 359 | C   | HIS | A | 42 | 5008  | 8209  | 9751   | 1505 | -1980 | -1237 |
| ATOM   | 360 | O   | HIS | A | 42 | 3.400 | 0.755 | 1.741  | 1.00 | 61.73 |       |

|        |     |     |     |   |    |       |        |        |      |       |       |
|--------|-----|-----|-----|---|----|-------|--------|--------|------|-------|-------|
| ANISOU | 360 | O   | HIS | A | 42 | 4806  | 8346   | 10303  | 1302 | -1774 | -1370 |
| ATOM   | 361 | CB  | HIS | A | 42 | 4.289 | 0.399  | -1.104 | 1.00 | 60.69 |       |
| C      |     |     |     |   |    |       |        |        |      |       |       |
| ANISOU | 361 | CB  | HIS | A | 42 | 5437  | 8222   | 9402   | 1660 | -2719 | -1331 |
| ATOM   | 362 | CG  | HIS | A | 42 | 4.109 | 0.373  | -2.590 | 1.00 | 67.29 |       |
| C      |     |     |     |   |    |       |        |        |      |       |       |
| ANISOU | 362 | CG  | HIS | A | 42 | 6552  | 8985   | 10030  | 1922 | -3317 | -1425 |
| ATOM   | 363 | ND1 | HIS | A | 42 | 5.037 | 0.431  | -3.573 | 1.00 | 73.92 |       |
| N      |     |     |     |   |    |       |        |        |      |       |       |
| ANISOU | 363 | ND1 | HIS | A | 42 | 7063  | 9729   | 11294  | 2086 | -3840 | -1716 |
| ATOM   | 364 | CD2 | HIS | A | 42 | 2.852 | 0.272  | -3.165 | 1.00 | 68.58 |       |
| C      |     |     |     |   |    |       |        |        |      |       |       |
| ANISOU | 364 | CD2 | HIS | A | 42 | 7318  | 9126   | 9614   | 2049 | -3453 | -1278 |
| ATOM   | 365 | CE1 | HIS | A | 42 | 4.353 | 0.370  | -4.767 | 1.00 | 75.37 |       |
| C      |     |     |     |   |    |       |        |        |      |       |       |
| ANISOU | 365 | CE1 | HIS | A | 42 | 7712  | 9844   | 11083  | 2326 | -4325 | -1729 |
| ATOM   | 366 | NE2 | HIS | A | 42 | 3.054 | 0.281  | -4.473 | 1.00 | 72.62 |       |
| N      |     |     |     |   |    |       |        |        |      |       |       |
| ANISOU | 366 | NE2 | HIS | A | 42 | 7954  | 9530   | 10110  | 2307 | -4074 | -1462 |
| ATOM   | 367 | H   | HIS | A | 42 | 5.316 | 2.781  | -1.443 | 1.00 | 0.00  |       |
| H      |     |     |     |   |    |       |        |        |      |       |       |
| ATOM   | 368 | HA  | HIS | A | 42 | 2.719 | 1.748  | -0.626 | 1.00 | 0.00  |       |
| H      |     |     |     |   |    |       |        |        |      |       |       |
| ATOM   | 369 | HB3 | HIS | A | 42 | 3.778 | -0.457 | -0.663 | 1.00 | 0.00  |       |
| H      |     |     |     |   |    |       |        |        |      |       |       |
| ATOM   | 370 | HB2 | HIS | A | 42 | 5.342 | 0.251  | -0.865 | 1.00 | 0.00  |       |
| H      |     |     |     |   |    |       |        |        |      |       |       |
| ATOM   | 371 | HD1 | HIS | A | 42 | 6.085 | 0.509  | -3.323 | 1.00 | 0.00  |       |
| H      |     |     |     |   |    |       |        |        |      |       |       |
| ATOM   | 372 | HD2 | HIS | A | 42 | 2.032 | 0.211  | -2.579 | 1.00 | 0.00  |       |
| H      |     |     |     |   |    |       |        |        |      |       |       |
| ATOM   | 373 | HE1 | HIS | A | 42 | 4.859 | 0.397  | -5.641 | 1.00 | 0.00  |       |
| H      |     |     |     |   |    |       |        |        |      |       |       |
| ATOM   | 374 | N   | GLY | A | 43 | 4.731 | 2.583  | 1.629  | 1.00 | 52.69 |       |
| N      |     |     |     |   |    |       |        |        |      |       |       |
| ANISOU | 374 | N   | GLY | A | 43 | 4291  | 7260   | 8470   | 1517 | -1697 | -1032 |
| ATOM   | 375 | CA  | GLY | A | 43 | 4.972 | 2.705  | 3.060  | 1.00 | 50.13 |       |
| C      |     |     |     |   |    |       |        |        |      |       |       |
| ANISOU | 375 | CA  | GLY | A | 43 | 3892  | 6952   | 8204   | 1314 | -1169 | -948  |
| ATOM   | 376 | C   | GLY | A | 43 | 5.824 | 1.608  | 3.655  | 1.00 | 50.86 |       |
| C      |     |     |     |   |    |       |        |        |      |       |       |
| ANISOU | 376 | C   | GLY | A | 43 | 4129  | 7093   | 8105   | 1054 | -874  | -850  |
| ATOM   | 377 | O   | GLY | A | 43 | 5.638 | 1.251  | 4.823  | 1.00 | 49.84 |       |
| O      |     |     |     |   |    |       |        |        |      |       |       |
| ANISOU | 377 | O   | GLY | A | 43 | 3866  | 6932   | 8138   | 868  | -488  | -860  |
| ATOM   | 378 | H   | GLY | A | 43 | 5.181 | 3.268  | 1.039  | 1.00 | 0.00  |       |
| H      |     |     |     |   |    |       |        |        |      |       |       |
| ATOM   | 379 | HA3 | GLY | A | 43 | 4.017 | 2.745  | 3.584  | 1.00 | 0.00  |       |
| H      |     |     |     |   |    |       |        |        |      |       |       |
| ATOM   | 380 | HA2 | GLY | A | 43 | 5.432 | 3.671  | 3.267  | 1.00 | 0.00  |       |
| H      |     |     |     |   |    |       |        |        |      |       |       |
| ATOM   | 381 | N   | PHE | A | 44 | 6.785 | 1.079  | 2.867  | 1.00 | 46.08 |       |
| N      |     |     |     |   |    |       |        |        |      |       |       |
| ANISOU | 381 | N   | PHE | A | 44 | 3835  | 6534   | 7141   | 1051 | -1034 | -751  |
| ATOM   | 382 | CA  | PHE | A | 44 | 7.705 | 0.038  | 3.326  | 1.00 | 43.36 |       |
| C      |     |     |     |   |    |       |        |        |      |       |       |
| ANISOU | 382 | CA  | PHE | A | 44 | 3644  | 6218   | 6611   | 834  | -807  | -654  |

|        |     |     |     |   |    |       |        |        |      |             |
|--------|-----|-----|-----|---|----|-------|--------|--------|------|-------------|
| ATOM   | 383 | C   | PHE | A | 44 | 8.621 | 0.551  | 4.433  | 1.00 | 44.33       |
| C      |     |     |     |   |    |       |        |        |      |             |
| ANISOU | 383 | C   | PHE | A | 44 | 3975  | 6348   | 6522   | 745  | -464 -490   |
| ATOM   | 384 | O   | PHE | A | 44 | 9.004 | -0.219 | 5.301  | 1.00 | 43.37       |
| O      |     |     |     |   |    |       |        |        |      |             |
| ANISOU | 384 | O   | PHE | A | 44 | 3892  | 6213   | 6375   | 562  | -219 -449   |
| ATOM   | 385 | CB  | PHE | A | 44 | 8.546 | -0.514 | 2.166  | 1.00 | 44.11       |
| C      |     |     |     |   |    |       |        |        |      |             |
| ANISOU | 385 | CB  | PHE | A | 44 | 4026  | 6334   | 6402   | 876  | -1043 -599  |
| ATOM   | 386 | CG  | PHE | A | 44 | 7.776 | -1.181 | 1.047  | 1.00 | 47.73       |
| C      |     |     |     |   |    |       |        |        |      |             |
| ANISOU | 386 | CG  | PHE | A | 44 | 4364  | 6770   | 7001   | 956  | -1422 -773  |
| ATOM   | 387 | CD1 | PHE | A | 44 | 6.778 | -2.112 | 1.323  | 1.00 | 52.25       |
| C      |     |     |     |   |    |       |        |        |      |             |
| ANISOU | 387 | CD1 | PHE | A | 44 | 4552  | 7314   | 7985   | 833  | -1434 -960  |
| ATOM   | 388 | CD2 | PHE | A | 44 | 8.095 | -0.931 | -0.282 | 1.00 | 50.18       |
| C      |     |     |     |   |    |       |        |        |      |             |
| ANISOU | 388 | CD2 | PHE | A | 44 | 4985  | 7053   | 7028   | 1151 | -1754 -759  |
| ATOM   | 389 | CE1 | PHE | A | 44 | 6.086 | -2.747 | 0.288  | 1.00 | 55.72       |
| C      |     |     |     |   |    |       |        |        |      |             |
| ANISOU | 389 | CE1 | PHE | A | 44 | 4865  | 7715   | 8592   | 908  | -1835 -1156 |
| ATOM   | 390 | CE2 | PHE | A | 44 | 7.404 | -1.573 | -1.318 | 1.00 | 55.64       |
| C      |     |     |     |   |    |       |        |        |      |             |
| ANISOU | 390 | CE2 | PHE | A | 44 | 5627  | 7703   | 7811   | 1243 | -2161 -939  |
| ATOM   | 391 | CZ  | PHE | A | 44 | 6.407 | -2.475 | -1.024 | 1.00 | 55.56       |
| C      |     |     |     |   |    |       |        |        |      |             |
| ANISOU | 391 | CZ  | PHE | A | 44 | 5181  | 7681   | 8248   | 1120 | -2229 -1147 |
| ATOM   | 392 | H   | PHE | A | 44 | 6.892 | 1.401  | 1.916  | 1.00 | 0.00        |
| H      |     |     |     |   |    |       |        |        |      |             |
| ATOM   | 393 | HA  | PHE | A | 44 | 7.112 | -0.781 | 3.732  | 1.00 | 0.00        |
| H      |     |     |     |   |    |       |        |        |      |             |
| ATOM   | 394 | HB3 | PHE | A | 44 | 9.286 | -1.211 | 2.558  | 1.00 | 0.00        |
| H      |     |     |     |   |    |       |        |        |      |             |
| ATOM   | 395 | HB2 | PHE | A | 44 | 9.159 | 0.287  | 1.753  | 1.00 | 0.00        |
| H      |     |     |     |   |    |       |        |        |      |             |
| ATOM   | 396 | HD1 | PHE | A | 44 | 6.531 | -2.351 | 2.347  | 1.00 | 0.00        |
| H      |     |     |     |   |    |       |        |        |      |             |
| ATOM   | 397 | HD2 | PHE | A | 44 | 8.884 | -0.235 | -0.526 | 1.00 | 0.00        |
| H      |     |     |     |   |    |       |        |        |      |             |
| ATOM   | 398 | HE1 | PHE | A | 44 | 5.300 | -3.451 | 0.517  | 1.00 | 0.00        |
| H      |     |     |     |   |    |       |        |        |      |             |
| ATOM   | 399 | HE2 | PHE | A | 44 | 7.654 | -1.360 | -2.347 | 1.00 | 0.00        |
| H      |     |     |     |   |    |       |        |        |      |             |
| ATOM   | 400 | HZ  | PHE | A | 44 | 5.876 | -2.970 | -1.824 | 1.00 | 0.00        |
| H      |     |     |     |   |    |       |        |        |      |             |
| ATOM   | 401 | N   | PHE | A | 45 | 8.944 | 1.854  | 4.415  | 1.00 | 40.47       |
| N      |     |     |     |   |    |       |        |        |      |             |
| ANISOU | 401 | N   | PHE | A | 45 | 3636  | 5853   | 5885   | 885  | -469 -407   |
| ATOM   | 402 | CA  | PHE | A | 45 | 9.822 | 2.497  | 5.397  | 1.00 | 37.50       |
| C      |     |     |     |   |    |       |        |        |      |             |
| ANISOU | 402 | CA  | PHE | A | 45 | 3459  | 5462   | 5328   | 829  | -211 -283   |
| ATOM   | 403 | C   | PHE | A | 45 | 9.043 | 3.405  | 6.362  | 1.00 | 43.38       |
| C      |     |     |     |   |    |       |        |        |      |             |
| ANISOU | 403 | C   | PHE | A | 45 | 4065  | 6166   | 6250   | 858  | -11 -329    |
| ATOM   | 404 | O   | PHE | A | 45 | 9.657 | 4.099  | 7.169  | 1.00 | 41.29       |
| O      |     |     |     |   |    |       |        |        |      |             |
| ANISOU | 404 | O   | PHE | A | 45 | 3979  | 5873   | 5836   | 837  | 169 -251    |

|        |     |     |     |   |    |        |       |       |      |       |      |
|--------|-----|-----|-----|---|----|--------|-------|-------|------|-------|------|
| ATOM C | 405 | CB  | PHE | A | 45 | 10.939 | 3.274 | 4.672 | 1.00 | 37.42 |      |
| ANISOU | 405 | CB  | PHE | A | 45 | 3742   | 5436  | 5037  | 938  | -306  | -162 |
| ATOM C | 406 | CG  | PHE | A | 45 | 11.867 | 2.389 | 3.880 | 1.00 | 37.28 |      |
| ANISOU | 406 | CG  | PHE | A | 45 | 3897   | 5420  | 4847  | 888  | -397  | -111 |
| ATOM C | 407 | CD1 | PHE | A | 45 | 12.944 | 1.760 | 4.494 | 1.00 | 37.78 |      |
| ANISOU | 407 | CD1 | PHE | A | 45 | 4071   | 5468  | 4818  | 736  | -250  | -45  |
| ATOM C | 408 | CD2 | PHE | A | 45 | 11.666 | 2.180 | 2.520 | 1.00 | 40.03 |      |
| ANISOU | 408 | CD2 | PHE | A | 45 | 4323   | 5760  | 5126  | 1009 | -642  | -142 |
| ATOM C | 409 | CE1 | PHE | A | 45 | 13.805 | 0.939 | 3.761 | 1.00 | 38.02 |      |
| ANISOU | 409 | CE1 | PHE | A | 45 | 4231   | 5476  | 4739  | 693  | -305  | -11  |
| ATOM C | 410 | CE2 | PHE | A | 45 | 12.519 | 1.344 | 1.791 | 1.00 | 41.72 |      |
| ANISOU | 410 | CE2 | PHE | A | 45 | 4724   | 5951  | 5177  | 960  | -675  | -104 |
| ATOM C | 411 | CZ  | PHE | A | 45 | 13.580 | 0.727 | 2.419 | 1.00 | 37.81 |      |
| ANISOU | 411 | CZ  | PHE | A | 45 | 4281   | 5442  | 4641  | 796  | -485  | -39  |
| ATOM H | 412 | H   | PHE | A | 45 | 8.575  | 2.456 | 3.693 | 1.00 | 0.00  |      |
| ATOM H | 413 | HA  | PHE | A | 45 | 10.293 | 1.711 | 5.987 | 1.00 | 0.00  |      |
| ATOM H | 414 | HB3 | PHE | A | 45 | 11.516 | 3.843 | 5.401 | 1.00 | 0.00  |      |
| ATOM H | 415 | HB2 | PHE | A | 45 | 10.493 | 4.015 | 4.009 | 1.00 | 0.00  |      |
| ATOM H | 416 | HD1 | PHE | A | 45 | 13.123 | 1.903 | 5.549 | 1.00 | 0.00  |      |
| ATOM H | 417 | HD2 | PHE | A | 45 | 10.844 | 2.665 | 2.015 | 1.00 | 0.00  |      |
| ATOM H | 418 | HE1 | PHE | A | 45 | 14.648 | 0.470 | 4.247 | 1.00 | 0.00  |      |
| ATOM H | 419 | HE2 | PHE | A | 45 | 12.346 | 1.183 | 0.737 | 1.00 | 0.00  |      |
| ATOM H | 420 | HZ  | PHE | A | 45 | 14.235 | 0.077 | 1.858 | 1.00 | 0.00  |      |
| ATOM N | 421 | N   | ALA | A | 46 | 7.691  | 3.378 | 6.292 | 1.00 | 44.10 |      |
| ANISOU | 421 | N   | ALA | A | 46 | 3827   | 6232  | 6695  | 904  | -41   | -479 |
| ATOM C | 422 | CA  | ALA | A | 46 | 6.808  | 4.213 | 7.120 | 1.00 | 46.25 |      |
| ANISOU | 422 | CA  | ALA | A | 46 | 3918   | 6437  | 7217  | 941  | 178   | -554 |
| ATOM C | 423 | C   | ALA | A | 46 | 6.800  | 3.877 | 8.620 | 1.00 | 52.04 |      |
| ANISOU | 423 | C   | ALA | A | 46 | 4714   | 7101  | 7958  | 752  | 625   | -544 |
| ATOM O | 424 | O   | ALA | A | 46 | 6.607  | 4.781 | 9.435 | 1.00 | 52.41 |      |
| ANISOU | 424 | O   | ALA | A | 46 | 4815   | 7084  | 8015  | 782  | 855   | -541 |
| ATOM C | 425 | CB  | ALA | A | 46 | 5.389  | 4.180 | 6.572 | 1.00 | 50.10 |      |
| ANISOU | 425 | CB  | ALA | A | 46 | 3984   | 6882  | 8171  | 1043 | 7     | -750 |
| ATOM H | 426 | H   | ALA | A | 46 | 7.231  | 2.757 | 5.641 | 1.00 | 0.00  |      |

|        |     |     |     |   |    |       |        |        |      |       |       |
|--------|-----|-----|-----|---|----|-------|--------|--------|------|-------|-------|
| ATOM H | 427 | HA  | ALA | A | 46 | 7.161 | 5.240  | 7.026  | 1.00 | 0.00  |       |
| ATOM H | 428 | HB1 | ALA | A | 46 | 4.744 | 4.802  | 7.193  | 1.00 | 0.00  |       |
| ATOM H | 429 | HB2 | ALA | A | 46 | 5.385 | 4.560  | 5.550  | 1.00 | 0.00  |       |
| ATOM H | 430 | HB3 | ALA | A | 46 | 5.020 | 3.154  | 6.579  | 1.00 | 0.00  |       |
| ATOM N | 431 | N   | PHE | A | 47 | 6.978 | 2.593  | 8.982  | 1.00 | 49.05 |       |
| ANISOU | 431 | N   | PHE | A | 47 | 4372  | 6708   | 7557   | 571  | 756   | -540  |
| ATOM C | 432 | CA  | PHE | A | 47 | 6.946 | 2.135  | 10.376 | 1.00 | 50.22 |       |
| ANISOU | 432 | CA  | PHE | A | 47 | 4678  | 6746   | 7659   | 404  | 1186  | -522  |
| ATOM C | 433 | C   | PHE | A | 47 | 8.011 | 1.039  | 10.667 | 1.00 | 51.02 |       |
| ANISOU | 433 | C   | PHE | A | 47 | 5087  | 6853   | 7446   | 267  | 1190  | -407  |
| ATOM O | 434 | O   | PHE | A | 47 | 8.603 | 0.535  | 9.707  | 1.00 | 49.26 |       |
| ANISOU | 434 | O   | PHE | A | 47 | 4857  | 6723   | 7136   | 283  | 890   | -371  |
| ATOM C | 435 | CB  | PHE | A | 47 | 5.513 | 1.704  | 10.776 | 1.00 | 56.55 |       |
| ANISOU | 435 | CB  | PHE | A | 47 | 5129  | 7418   | 8942   | 323  | 1496  | -693  |
| ATOM C | 436 | CG  | PHE | A | 47 | 4.903 | 0.567  | 9.987  | 1.00 | 60.84 |       |
| ANISOU | 436 | CG  | PHE | A | 47 | 5336  | 7962   | 9817   | 255  | 1352  | -818  |
| ATOM C | 437 | CD1 | PHE | A | 47 | 4.206 | 0.812  | 8.806  | 1.00 | 65.07 |       |
| ANISOU | 437 | CD1 | PHE | A | 47 | 5490  | 8547   | 10685  | 398  | 975   | -961  |
| ATOM C | 438 | CD2 | PHE | A | 47 | 4.964 | -0.742 | 10.459 | 1.00 | 64.70 |       |
| ANISOU | 438 | CD2 | PHE | A | 47 | 5907  | 8372   | 10303  | 60   | 1582  | -808  |
| ATOM C | 439 | CE1 | PHE | A | 47 | 3.629 | -0.241 | 8.083  | 1.00 | 69.37 |       |
| ANISOU | 439 | CE1 | PHE | A | 47 | 5728  | 9074   | 11556  | 339  | 796   | -1110 |
| ATOM C | 440 | CE2 | PHE | A | 47 | 4.383 | -1.792 | 9.737  | 1.00 | 66.86 |       |
| ANISOU | 440 | CE2 | PHE | A | 47 | 5857  | 8629   | 10918  | -14  | 1452  | -944  |
| ATOM C | 441 | CZ  | PHE | A | 47 | 3.723 | -1.534 | 8.554  | 1.00 | 67.19 |       |
| ANISOU | 441 | CZ  | PHE | A | 47 | 5504  | 8729   | 11295  | 123  | 1049  | -1105 |
| ATOM H | 442 | H   | PHE | A | 47 | 7.144 | 1.888  | 8.278  | 1.00 | 0.00  |       |
| ATOM H | 443 | HA  | PHE | A | 47 | 7.201 | 2.995  | 10.996 | 1.00 | 0.00  |       |
| ATOM H | 444 | HB3 | PHE | A | 47 | 4.852 | 2.569  | 10.729 | 1.00 | 0.00  |       |
| ATOM H | 445 | HB2 | PHE | A | 47 | 5.496 | 1.454  | 11.837 | 1.00 | 0.00  |       |
| ATOM H | 446 | HD1 | PHE | A | 47 | 4.105 | 1.822  | 8.438  | 1.00 | 0.00  |       |
| ATOM H | 447 | HD2 | PHE | A | 47 | 5.464 | -0.957 | 11.392 | 1.00 | 0.00  |       |
| ATOM H | 448 | HE1 | PHE | A | 47 | 3.111 | -0.040 | 7.157  | 1.00 | 0.00  |       |
| ATOM H | 449 | HE2 | PHE | A | 47 | 4.452 | -2.804 | 10.107 | 1.00 | 0.00  |       |

|        |     |     |     |   |    |        |        |        |      |       |      |
|--------|-----|-----|-----|---|----|--------|--------|--------|------|-------|------|
| ATOM H | 450 | HZ  | PHE | A | 47 | 3.279  | -2.345 | 7.996  | 1.00 | 0.00  |      |
| ATOM N | 451 | N   | PRO | A | 48 | 8.320  | 0.693  | 11.955 | 1.00 | 46.72 |      |
| ANISOU | 451 | N   | PRO | A | 48 | 4860   | 6190   | 6701   | 154  | 1505  | -346 |
| ATOM C | 452 | CA  | PRO | A | 48 | 9.362  | -0.323 | 12.217 | 1.00 | 44.87 |      |
| ANISOU | 452 | CA  | PRO | A | 48 | 4931   | 5940   | 6176   | 61   | 1441  | -240 |
| ATOM C | 453 | C   | PRO | A | 48 | 9.086  | -1.700 | 11.618 | 1.00 | 48.00 |      |
| ANISOU | 453 | C   | PRO | A | 48 | 5151   | 6343   | 6743   | -47  | 1402  | -278 |
| ATOM O | 454 | O   | PRO | A | 48 | 7.941  | -2.159 | 11.627 | 1.00 | 48.16 |      |
| ANISOU | 454 | O   | PRO | A | 48 | 4901   | 6290   | 7108   | -123 | 1617  | -395 |
| ATOM C | 455 | CB  | PRO | A | 48 | 9.405  | -0.403 | 13.752 | 1.00 | 48.14 |      |
| ANISOU | 455 | CB  | PRO | A | 48 | 5743   | 6176   | 6372   | -8   | 1799  | -196 |
| ATOM C | 456 | CG  | PRO | A | 48 | 8.817  | 0.872  | 14.226 | 1.00 | 53.67 |      |
| ANISOU | 456 | CG  | PRO | A | 48 | 6415   | 6836   | 7141   | 72   | 1982  | -251 |
| ATOM C | 457 | CD  | PRO | A | 48 | 7.763  | 1.212  | 13.225 | 1.00 | 50.13 |      |
| ANISOU | 457 | CD  | PRO | A | 48 | 5445   | 6469   | 7133   | 128  | 1920  | -373 |
| ATOM H | 458 | HA  | PRO | A | 48 | 10.321 | 0.043  | 11.849 | 1.00 | 0.00  |      |
| ATOM H | 459 | HB3 | PRO | A | 48 | 10.442 | -0.468 | 14.082 | 1.00 | 0.00  |      |
| ATOM H | 460 | HB2 | PRO | A | 48 | 8.785  | -1.234 | 14.088 | 1.00 | 0.00  |      |
| ATOM H | 461 | HG3 | PRO | A | 48 | 9.583  | 1.647  | 14.222 | 1.00 | 0.00  |      |
| ATOM H | 462 | HG2 | PRO | A | 48 | 8.354  | 0.716  | 15.200 | 1.00 | 0.00  |      |
| ATOM H | 463 | HD2 | PRO | A | 48 | 6.849  | 0.669  | 13.466 | 1.00 | 0.00  |      |
| ATOM H | 464 | HD3 | PRO | A | 48 | 7.666  | 2.296  | 13.159 | 1.00 | 0.00  |      |
| ATOM N | 465 | N   | VAL | A | 49 | 10.146 | -2.363 | 11.104 | 1.00 | 42.81 |      |
| ANISOU | 465 | N   | VAL | A | 49 | 4627   | 5749   | 5888   | -58  | 1141  | -196 |
| ATOM C | 466 | CA  | VAL | A | 49 | 10.033 | -3.709 | 10.532 | 1.00 | 42.55 |      |
| ANISOU | 466 | CA  | VAL | A | 49 | 4476   | 5715   | 5977   | -159 | 1086  | -226 |
| ATOM C | 467 | C   | VAL | A | 49 | 9.985  | -4.712 | 11.695 | 1.00 | 47.73 |      |
| ANISOU | 467 | C   | VAL | A | 49 | 5389   | 6194   | 6552   | -303 | 1419  | -182 |
| ATOM O | 468 | O   | VAL | A | 49 | 10.879 | -4.716 | 12.545 | 1.00 | 47.81 |      |
| ANISOU | 468 | O   | VAL | A | 49 | 5802   | 6128   | 6235   | -292 | 1445  | -70  |
| ATOM C | 469 | CB  | VAL | A | 49 | 11.168 | -4.056 | 9.514  | 1.00 | 43.60 |      |
| ANISOU | 469 | CB  | VAL | A | 49 | 4669   | 5951   | 5947   | -114 | 731   | -163 |
| ATOM C | 470 | CG1 | VAL | A | 49 | 10.922 | -5.414 | 8.863  | 1.00 | 43.75 |      |
| ANISOU | 470 | CG1 | VAL | A | 49 | 4548   | 5960   | 6114   | -214 | 679   | -218 |
| ATOM C | 471 | CG2 | VAL | A | 49 | 11.319 | -2.982 | 8.442  | 1.00 | 41.92 |      |

|        |     |      |     |   |    |        |        |        |      |       |      |
|--------|-----|------|-----|---|----|--------|--------|--------|------|-------|------|
| ANISOU | 471 | CG2  | VAL | A | 49 | 4334   | 5859   | 5735   | 41   | 467   | -179 |
| ATOM   | 472 | H    | VAL | A | 49 | 11.060 | -1.932 | 11.104 | 1.00 | 0.00  |      |
| H      |     |      |     |   |    |        |        |        |      |       |      |
| ATOM   | 473 | HA   | VAL | A | 49 | 9.082  | -3.767 | 10.003 | 1.00 | 0.00  |      |
| H      |     |      |     |   |    |        |        |        |      |       |      |
| ATOM   | 474 | HB   | VAL | A | 49 | 12.107 | -4.114 | 10.065 | 1.00 | 0.00  |      |
| H      |     |      |     |   |    |        |        |        |      |       |      |
| ATOM   | 475 | HG11 | VAL | A | 49 | 11.726 | -5.631 | 8.159  | 1.00 | 0.00  |      |
| H      |     |      |     |   |    |        |        |        |      |       |      |
| ATOM   | 476 | HG12 | VAL | A | 49 | 10.894 | -6.186 | 9.632  | 1.00 | 0.00  |      |
| H      |     |      |     |   |    |        |        |        |      |       |      |
| ATOM   | 477 | HG13 | VAL | A | 49 | 9.970  | -5.396 | 8.332  | 1.00 | 0.00  |      |
| H      |     |      |     |   |    |        |        |        |      |       |      |
| ATOM   | 478 | HG21 | VAL | A | 49 | 12.118 | -3.263 | 7.756  | 1.00 | 0.00  |      |
| H      |     |      |     |   |    |        |        |        |      |       |      |
| ATOM   | 479 | HG22 | VAL | A | 49 | 10.384 | -2.885 | 7.890  | 1.00 | 0.00  |      |
| H      |     |      |     |   |    |        |        |        |      |       |      |
| ATOM   | 480 | HG23 | VAL | A | 49 | 11.563 | -2.030 | 8.913  | 1.00 | 0.00  |      |
| H      |     |      |     |   |    |        |        |        |      |       |      |
| ATOM   | 481 | N    | THR | A | 50 | 8.942  | -5.547 | 11.733 | 1.00 | 45.33 |      |
| N      |     |      |     |   |    |        |        |        |      |       |      |
| ANISOU | 481 | N    | THR | A | 50 | 4872   | 5792   | 6558   | -427 | 1664  | -282 |
| ATOM   | 482 | CA   | THR | A | 50 | 8.767  | -6.562 | 12.779 | 1.00 | 46.60 |      |
| C      |     |      |     |   |    |        |        |        |      |       |      |
| ANISOU | 482 | CA   | THR | A | 50 | 5300   | 5737   | 6670   | -572 | 2056  | -241 |
| ATOM   | 483 | C    | THR | A | 50 | 9.238  | -7.917 | 12.255 | 1.00 | 49.57 |      |
| C      |     |      |     |   |    |        |        |        |      |       |      |
| ANISOU | 483 | C    | THR | A | 50 | 5694   | 6103   | 7037   | -658 | 1919  | -214 |
| ATOM   | 484 | O    | THR | A | 50 | 9.315  | -8.113 | 11.037 | 1.00 | 47.22 |      |
| O      |     |      |     |   |    |        |        |        |      |       |      |
| ANISOU | 484 | O    | THR | A | 50 | 5103   | 5952   | 6886   | -631 | 1593  | -280 |
| ATOM   | 485 | CB   | THR | A | 50 | 7.291  | -6.658 | 13.205 | 1.00 | 53.38 |      |
| C      |     |      |     |   |    |        |        |        |      |       |      |
| ANISOU | 485 | CB   | THR | A | 50 | 5901   | 6429   | 7950   | -679 | 2525  | -385 |
| ATOM   | 486 | OG1  | THR | A | 50 | 6.545  | -7.226 | 12.129 | 1.00 | 51.92 |      |
| O      |     |      |     |   |    |        |        |        |      |       |      |
| ANISOU | 486 | OG1  | THR | A | 50 | 5190   | 6303   | 8233   | -726 | 2377  | -555 |
| ATOM   | 487 | CG2  | THR | A | 50 | 6.697  | -5.315 | 13.627 | 1.00 | 54.11 |      |
| C      |     |      |     |   |    |        |        |        |      |       |      |
| ANISOU | 487 | CG2  | THR | A | 50 | 5944   | 6508   | 8106   | -593 | 2702  | -431 |
| ATOM   | 488 | H    | THR | A | 50 | 8.228  | -5.496 | 11.020 | 1.00 | 0.00  |      |
| H      |     |      |     |   |    |        |        |        |      |       |      |
| ATOM   | 489 | HA   | THR | A | 50 | 9.369  | -6.287 | 13.645 | 1.00 | 0.00  |      |
| H      |     |      |     |   |    |        |        |        |      |       |      |
| ATOM   | 490 | HB   | THR | A | 50 | 7.228  | -7.337 | 14.055 | 1.00 | 0.00  |      |
| H      |     |      |     |   |    |        |        |        |      |       |      |
| ATOM   | 491 | HG1  | THR | A | 50 | 5.699  | -7.540 | 12.456 | 1.00 | 0.00  |      |
| H      |     |      |     |   |    |        |        |        |      |       |      |
| ATOM   | 492 | HG21 | THR | A | 50 | 5.655  | -5.453 | 13.915 | 1.00 | 0.00  |      |
| H      |     |      |     |   |    |        |        |        |      |       |      |
| ATOM   | 493 | HG22 | THR | A | 50 | 7.258  | -4.919 | 14.473 | 1.00 | 0.00  |      |
| H      |     |      |     |   |    |        |        |        |      |       |      |
| ATOM   | 494 | HG23 | THR | A | 50 | 6.754  | -4.614 | 12.794 | 1.00 | 0.00  |      |
| H      |     |      |     |   |    |        |        |        |      |       |      |
| ATOM   | 495 | N    | ASP | A | 51 | 9.501  | -8.865 | 13.169 | 1.00 | 48.82 |      |
| N      |     |      |     |   |    |        |        |        |      |       |      |
| ANISOU | 495 | N    | ASP | A | 51 | 5982   | 5809   | 6760   | -752 | 2180  | -121 |

|        |     |     |     |   |    |        |         |        |       |       |      |
|--------|-----|-----|-----|---|----|--------|---------|--------|-------|-------|------|
| ATOM   | 496 | CA  | ASP | A | 51 | 9.907  | -10.228 | 12.822 | 1.00  | 49.36 |      |
| C      |     |     |     |   |    |        |         |        |       |       |      |
| ANISOU | 496 | CA  | ASP | A | 51 | 6110   | 5820    | 6825   | -840  | 2111  | -89  |
| ATOM   | 497 | C   | ASP | A | 51 | 8.772  | -10.998 | 12.125 | 1.00  | 56.31 |      |
| C      |     |     |     |   |    |        |         |        |       |       |      |
| ANISOU | 497 | C   | ASP | A | 51 | 6531   | 6664    | 8198   | -979  | 2249  | -261 |
| ATOM   | 498 | O   | ASP | A | 51 | 9.048  | -11.918 | 11.354 | 1.00  | 55.14 |      |
| O      |     |     |     |   |    |        |         |        |       |       |      |
| ANISOU | 498 | O   | ASP | A | 51 | 6272   | 6554    | 8125   | -1024 | 2047  | -287 |
| ATOM   | 499 | CB  | ASP | A | 51 | 10.416 | -10.979 | 14.062 | 1.00  | 53.20 |      |
| C      |     |     |     |   |    |        |         |        |       |       |      |
| ANISOU | 499 | CB  | ASP | A | 51 | 7179   | 6057    | 6978   | -880  | 2366  | 58   |
| ATOM   | 500 | CG  | ASP | A | 51 | 11.781 | -10.547 | 14.575 | 1.00  | 60.32 |      |
| C      |     |     |     |   |    |        |         |        |       |       |      |
| ANISOU | 500 | CG  | ASP | A | 51 | 8524   | 6978    | 7418   | -730  | 2049  | 203  |
| ATOM   | 501 | OD1 | ASP | A | 51 | 12.315 | -9.527  | 14.076 | 1.00  | 58.48 |      |
| O      |     |     |     |   |    |        |         |        |       |       |      |
| ANISOU | 501 | OD1 | ASP | A | 51 | 8139   | 6942    | 7139   | -612  | 1711  | 190  |
| ATOM   | 502 | OD2 | ASP | A | 51 | 12.311 | -11.222 | 15.482 | 1.00  | 66.26 |      |
| O1-    |     |     |     |   |    |        |         |        |       |       |      |
| ANISOU | 502 | OD2 | ASP | A | 51 | 9781   | 7520    | 7874   | -724  | 2130  | 318  |
| ATOM   | 503 | H   | ASP | A | 51 | 9.422  | -8.653  | 14.153 | 1.00  | 0.00  |      |
| H      |     |     |     |   |    |        |         |        |       |       |      |
| ATOM   | 504 | HA  | ASP | A | 51 | 10.736 | -10.155 | 12.118 | 1.00  | 0.00  |      |
| H      |     |     |     |   |    |        |         |        |       |       |      |
| ATOM   | 505 | HB3 | ASP | A | 51 | 10.432 | -12.049 | 13.854 | 1.00  | 0.00  |      |
| H      |     |     |     |   |    |        |         |        |       |       |      |
| ATOM   | 506 | HB2 | ASP | A | 51 | 9.684  | -10.887 | 14.864 | 1.00  | 0.00  |      |
| H      |     |     |     |   |    |        |         |        |       |       |      |
| ATOM   | 507 | N   | ALA | A | 52 | 7.504  | -10.598 | 12.372 | 1.00  | 56.69 |      |
| N      |     |     |     |   |    |        |         |        |       |       |      |
| ANISOU | 507 | N   | ALA | A | 52 | 6290   | 6626    | 8624   | -1041 | 2579  | -403 |
| ATOM   | 508 | CA  | ALA | A | 52 | 6.319  | -11.184 | 11.733 | 1.00  | 59.23 |      |
| C      |     |     |     |   |    |        |         |        |       |       |      |
| ANISOU | 508 | CA  | ALA | A | 52 | 6089   | 6885    | 9530   | -1164 | 2684  | -624 |
| ATOM   | 509 | C   | ALA | A | 52 | 6.355  | -10.843 | 10.240 | 1.00  | 61.87 |      |
| C      |     |     |     |   |    |        |         |        |       |       |      |
| ANISOU | 509 | C   | ALA | A | 52 | 6018   | 7471    | 10017  | -1050 | 2111  | -745 |
| ATOM   | 510 | O   | ALA | A | 52 | 6.186  | -11.732 | 9.407  | 1.00  | 62.31 |      |
| O      |     |     |     |   |    |        |         |        |       |       |      |
| ANISOU | 510 | O   | ALA | A | 52 | 5838   | 7531    | 10305  | -1116 | 1931  | -861 |
| ATOM   | 511 | CB  | ALA | A | 52 | 5.050  | -10.630 | 12.370 | 1.00  | 63.46 |      |
| C      |     |     |     |   |    |        |         |        |       |       |      |
| ANISOU | 511 | CB  | ALA | A | 52 | 6389   | 7250    | 10473  | -1227 | 3155  | -761 |
| ATOM   | 512 | H   | ALA | A | 52 | 7.329  | -9.853  | 13.031 | 1.00  | 0.00  |      |
| H      |     |     |     |   |    |        |         |        |       |       |      |
| ATOM   | 513 | HA  | ALA | A | 52 | 6.341  | -12.267 | 11.856 | 1.00  | 0.00  |      |
| H      |     |     |     |   |    |        |         |        |       |       |      |
| ATOM   | 514 | HB1 | ALA | A | 52 | 4.178  | -11.072 | 11.888 | 1.00  | 0.00  |      |
| H      |     |     |     |   |    |        |         |        |       |       |      |
| ATOM   | 515 | HB2 | ALA | A | 52 | 5.040  | -10.874 | 13.432 | 1.00  | 0.00  |      |
| H      |     |     |     |   |    |        |         |        |       |       |      |
| ATOM   | 516 | HB3 | ALA | A | 52 | 5.023  | -9.547  | 12.246 | 1.00  | 0.00  |      |
| H      |     |     |     |   |    |        |         |        |       |       |      |
| ATOM   | 517 | N   | ILE | A | 53 | 6.645  | -9.565  | 9.914  | 1.00  | 56.38 |      |
| N      |     |     |     |   |    |        |         |        |       |       |      |
| ANISOU | 517 | N   | ILE | A | 53 | 5312   | 6962    | 9149   | -872  | 1827  | -711 |

|        |     |      |     |   |    |        |         |        |      |       |      |
|--------|-----|------|-----|---|----|--------|---------|--------|------|-------|------|
| ATOM C | 518 | CA   | ILE | A | 53 | 6.767  | -9.045  | 8.550  | 1.00 | 54.55 |      |
| ANISOU | 518 | CA   | ILE | A | 53 | 4834   | 6938    | 8953   | -723 | 1302  | -791 |
| ATOM C | 519 | C    | ILE | A | 53 | 8.057  | -9.561  | 7.882  | 1.00 | 55.37 |      |
| ANISOU | 519 | C    | ILE | A | 53 | 5201   | 7154    | 8684   | -682 | 978   | -667 |
| ATOM O | 520 | O    | ILE | A | 53 | 8.010  | -9.993  | 6.727  | 1.00 | 55.46 |      |
| ANISOU | 520 | O    | ILE | A | 53 | 5040   | 7233    | 8798   | -655 | 661   | -771 |
| ATOM C | 521 | CB   | ILE | A | 53 | 6.614  | -7.493  | 8.549  | 1.00 | 56.94 |      |
| ANISOU | 521 | CB   | ILE | A | 53 | 5084   | 7347    | 9204   | -550 | 1194  | -784 |
| ATOM C | 522 | CG1  | ILE | A | 53 | 5.129  | -7.103  | 8.818  | 1.00 | 61.31 |      |
| ANISOU | 522 | CG1  | ILE | A | 53 | 5229   | 7778    | 10287  | -579 | 1450  | -979 |
| ATOM C | 523 | CG2  | ILE | A | 53 | 7.119  | -6.847  | 7.252  | 1.00 | 54.89 |      |
| ANISOU | 523 | CG2  | ILE | A | 53 | 4776   | 7277    | 8801   | -364 | 670   | -792 |
| ATOM C | 524 | CD1  | ILE | A | 53 | 4.917  | -5.734  | 9.535  | 1.00 | 70.22 |      |
| ANISOU | 524 | CD1  | ILE | A | 53 | 6395   | 8927    | 11358  | -455 | 1568  | -943 |
| ATOM H | 525 | H    | ILE | A | 53 | 6.797  | -8.881  | 10.641 | 1.00 | 0.00  |      |
| ATOM H | 526 | HA   | ILE | A | 53 | 5.930  | -9.448  | 7.980  | 1.00 | 0.00  |      |
| ATOM H | 527 | HB   | ILE | A | 53 | 7.214  | -7.100  | 9.370  | 1.00 | 0.00  |      |
| ATOM H | 528 | HG13 | ILE | A | 53 | 4.649  | -7.891  | 9.398  | 1.00 | 0.00  |      |
| ATOM H | 529 | HG12 | ILE | A | 53 | 4.580  | -7.105  | 7.877  | 1.00 | 0.00  |      |
| ATOM H | 530 | HG21 | ILE | A | 53 | 6.987  | -5.766  | 7.308  | 1.00 | 0.00  |      |
| ATOM H | 531 | HG22 | ILE | A | 53 | 8.176  | -7.077  | 7.118  | 1.00 | 0.00  |      |
| ATOM H | 532 | HG23 | ILE | A | 53 | 6.553  | -7.238  | 6.406  | 1.00 | 0.00  |      |
| ATOM H | 533 | HD11 | ILE | A | 53 | 3.850  | -5.558  | 9.675  | 1.00 | 0.00  |      |
| ATOM H | 534 | HD12 | ILE | A | 53 | 5.412  | -5.751  | 10.506 | 1.00 | 0.00  |      |
| ATOM H | 535 | HD13 | ILE | A | 53 | 5.340  | -4.935  | 8.926  | 1.00 | 0.00  |      |
| ATOM N | 536 | N    | ALA | A | 54 | 9.191  | -9.549  | 8.611  | 1.00 | 48.90 |      |
| ANISOU | 536 | N    | ALA | A | 54 | 4800   | 6322    | 7457   | -672 | 1055  | -467 |
| ATOM C | 537 | CA   | ALA | A | 54 | 10.464 | -10.031 | 8.075  | 1.00 | 45.84 |      |
| ANISOU | 537 | CA   | ALA | A | 54 | 4634   | 5998    | 6784   | -635 | 798   | -361 |
| ATOM C | 538 | C    | ALA | A | 54 | 11.158 | -11.024 | 9.023  | 1.00 | 49.20 |      |
| ANISOU | 538 | C    | ALA | A | 54 | 5404   | 6270    | 7021   | -732 | 1000  | -231 |
| ATOM O | 539 | O    | ALA | A | 54 | 11.875 | -10.604 | 9.935  | 1.00 | 46.61 |      |
| ANISOU | 539 | O    | ALA | A | 54 | 5397   | 5892    | 6419   | -682 | 1068  | -100 |
| ATOM C | 540 | CB   | ALA | A | 54 | 11.378 | -8.862  | 7.736  | 1.00 | 44.09 |      |

|        |     |     |     |   |    |        |         |        |       |       |      |
|--------|-----|-----|-----|---|----|--------|---------|--------|-------|-------|------|
| ANISOU | 540 | CB  | ALA | A | 54 | 4544   | 5910    | 6298   | -470  | 556   | -271 |
| ATOM   | 541 | H   | ALA | A | 54 | 9.179  | -9.200  | 9.559  | 1.00  | 0.00  |      |
| H      |     |     |     |   |    |        |         |        |       |       |      |
| ATOM   | 542 | HA  | ALA | A | 54 | 10.250 | -10.560 | 7.146  | 1.00  | 0.00  |      |
| H      |     |     |     |   |    |        |         |        |       |       |      |
| ATOM   | 543 | HB1 | ALA | A | 54 | 12.320 | -9.240  | 7.339  | 1.00  | 0.00  |      |
| H      |     |     |     |   |    |        |         |        |       |       |      |
| ATOM   | 544 | HB2 | ALA | A | 54 | 10.898 | -8.229  | 6.990  | 1.00  | 0.00  |      |
| H      |     |     |     |   |    |        |         |        |       |       |      |
| ATOM   | 545 | HB3 | ALA | A | 54 | 11.572 | -8.279  | 8.636  | 1.00  | 0.00  |      |
| H      |     |     |     |   |    |        |         |        |       |       |      |
| ATOM   | 546 | N   | PRO | A | 55 | 10.950 | -12.353 | 8.816  | 1.00  | 48.12 |      |
| N      |     |     |     |   |    |        |         |        |       |       |      |
| ANISOU | 546 | N   | PRO | A | 55 | 5225   | 6032    | 7026   | -859  | 1073  | -275 |
| ATOM   | 547 | CA  | PRO | A | 55 | 11.572 | -13.358 | 9.702  | 1.00  | 48.32 |      |
| C      |     |     |     |   |    |        |         |        |       |       |      |
| ANISOU | 547 | CA  | PRO | A | 55 | 5616   | 5876    | 6867   | -933  | 1257  | -144 |
| ATOM   | 548 | C   | PRO | A | 55 | 13.056 | -13.156 | 10.004 | 1.00  | 48.62 |      |
| C      |     |     |     |   |    |        |         |        |       |       |      |
| ANISOU | 548 | C   | PRO | A | 55 | 5999   | 5931    | 6541   | -814  | 1035  | 15   |
| ATOM   | 549 | O   | PRO | A | 55 | 13.858 | -12.932 | 9.099  | 1.00  | 45.54 |      |
| O      |     |     |     |   |    |        |         |        |       |       |      |
| ANISOU | 549 | O   | PRO | A | 55 | 5526   | 5671    | 6107   | -730  | 728   | 12   |
| ATOM   | 550 | CB  | PRO | A | 55 | 11.315 | -14.672 | 8.965  | 1.00  | 51.23 |      |
| C      |     |     |     |   |    |        |         |        |       |       |      |
| ANISOU | 550 | CB  | PRO | A | 55 | 5820   | 6182    | 7464   | -1055 | 1251  | -237 |
| ATOM   | 551 | CG  | PRO | A | 55 | 10.034 | -14.435 | 8.247  | 1.00  | 57.25 |      |
| C      |     |     |     |   |    |        |         |        |       |       |      |
| ANISOU | 551 | CG  | PRO | A | 55 | 6124   | 7007    | 8622   | -1098 | 1234  | -450 |
| ATOM   | 552 | CD  | PRO | A | 55 | 10.106 | -13.004 | 7.789  | 1.00  | 51.27 |      |
| C      |     |     |     |   |    |        |         |        |       |       |      |
| ANISOU | 552 | CD  | PRO | A | 55 | 5263   | 6450    | 7768   | -931  | 972   | -459 |
| ATOM   | 553 | HA  | PRO | A | 55 | 11.025 | -13.376 | 10.645 | 1.00  | 0.00  |      |
| H      |     |     |     |   |    |        |         |        |       |       |      |
| ATOM   | 554 | HB3 | PRO | A | 55 | 11.178 | -15.472 | 9.692  | 1.00  | 0.00  |      |
| H      |     |     |     |   |    |        |         |        |       |       |      |
| ATOM   | 555 | HB2 | PRO | A | 55 | 12.110 | -14.839 | 8.238  | 1.00  | 0.00  |      |
| H      |     |     |     |   |    |        |         |        |       |       |      |
| ATOM   | 556 | HG3 | PRO | A | 55 | 9.203  | -14.550 | 8.943  | 1.00  | 0.00  |      |
| H      |     |     |     |   |    |        |         |        |       |       |      |
| ATOM   | 557 | HG2 | PRO | A | 55 | 9.980  | -15.090 | 7.378  | 1.00  | 0.00  |      |
| H      |     |     |     |   |    |        |         |        |       |       |      |
| ATOM   | 558 | HD2 | PRO | A | 55 | 10.613 | -12.959 | 6.825  | 1.00  | 0.00  |      |
| H      |     |     |     |   |    |        |         |        |       |       |      |
| ATOM   | 559 | HD3 | PRO | A | 55 | 9.108  | -12.567 | 7.814  | 1.00  | 0.00  |      |
| H      |     |     |     |   |    |        |         |        |       |       |      |
| ATOM   | 560 | N   | GLY | A | 56 | 13.381 | -13.195 | 11.293 | 1.00  | 46.01 |      |
| N      |     |     |     |   |    |        |         |        |       |       |      |
| ANISOU | 560 | N   | GLY | A | 56 | 6068   | 5440    | 5973   | -799  | 1198  | 136  |
| ATOM   | 561 | CA  | GLY | A | 56 | 14.737 | -13.042 | 11.803 | 1.00  | 44.54 |      |
| C      |     |     |     |   |    |        |         |        |       |       |      |
| ANISOU | 561 | CA  | GLY | A | 56 | 6224   | 5212    | 5486   | -676  | 959   | 259  |

[illegible]

|        |     |     |     |   |    |        |         |        |      |          |
|--------|-----|-----|-----|---|----|--------|---------|--------|------|----------|
| ATOM   | 586 | HE2 | TYR | A | 57 | 14.773 | -3.748  | 11.594 | 1.00 | 0.00     |
| H      |     |     |     |   |    |        |         |        |      |          |
| ATOM   | 587 | HH  | TYR | A | 57 | 15.288 | -3.130  | 8.155  | 1.00 | 0.00     |
| H      |     |     |     |   |    |        |         |        |      |          |
| ATOM   | 588 | N   | SER | A | 58 | 15.216 | -8.931  | 13.720 | 1.00 | 37.18    |
| N      |     |     |     |   |    |        |         |        |      |          |
| ANISOU | 588 | N   | SER | A | 58 | 5694   | 4383    | 4051   | -352 | 836 309  |
| ATOM   | 589 | CA  | SER | A | 58 | 15.842 | -8.487  | 14.976 | 1.00 | 38.29    |
| C      |     |     |     |   |    |        |         |        |      |          |
| ANISOU | 589 | CA  | SER | A | 58 | 6310   | 4367    | 3870   | -254 | 767 372  |
| ATOM   | 590 | C   | SER | A | 58 | 17.181 | -9.195  | 15.273 | 1.00 | 43.09    |
| C      |     |     |     |   |    |        |         |        |      |          |
| ANISOU | 590 | C   | SER | A | 58 | 7189   | 4850    | 4332   | -173 | 421 431  |
| ATOM   | 591 | O   | SER | A | 58 | 18.028 | -8.634  | 15.969 | 1.00 | 42.89    |
| O      |     |     |     |   |    |        |         |        |      |          |
| ANISOU | 591 | O   | SER | A | 58 | 7437   | 4737    | 4121   | -49  | 162 438  |
| ATOM   | 592 | CB  | SER | A | 58 | 14.874 | -8.636  | 16.145 | 1.00 | 42.68    |
| C      |     |     |     |   |    |        |         |        |      |          |
| ANISOU | 592 | CB  | SER | A | 58 | 7233   | 4725    | 4257   | -310 | 1195 404 |
| ATOM   | 593 | OG  | SER | A | 58 | 14.569 | -10.002 | 16.357 | 1.00 | 47.37    |
| O      |     |     |     |   |    |        |         |        |      |          |
| ANISOU | 593 | OG  | SER | A | 58 | 7978   | 5161    | 4861   | -412 | 1414 451 |
| ATOM   | 594 | H   | SER | A | 58 | 14.332 | -9.411  | 13.815 | 1.00 | 0.00     |
| H      |     |     |     |   |    |        |         |        |      |          |
| ATOM   | 595 | HA  | SER | A | 58 | 16.057 | -7.424  | 14.870 | 1.00 | 0.00     |
| H      |     |     |     |   |    |        |         |        |      |          |
| ATOM   | 596 | HB3 | SER | A | 58 | 13.957 | -8.089  | 15.929 | 1.00 | 0.00     |
| H      |     |     |     |   |    |        |         |        |      |          |
| ATOM   | 597 | HB2 | SER | A | 58 | 15.326 | -8.221  | 17.046 | 1.00 | 0.00     |
| H      |     |     |     |   |    |        |         |        |      |          |
| ATOM   | 598 | HG  | SER | A | 58 | 13.720 | -10.206 | 15.958 | 1.00 | 0.00     |
| H      |     |     |     |   |    |        |         |        |      |          |
| ATOM   | 599 | N   | MET | A | 59 | 17.364 | -10.409 | 14.726 | 1.00 | 40.95    |
| N      |     |     |     |   |    |        |         |        |      |          |
| ANISOU | 599 | N   | MET | A | 59 | 6820   | 4556    | 4182   | -237 | 394 452  |
| ATOM   | 600 | CA  | MET | A | 59 | 18.570 | -11.232 | 14.835 | 1.00 | 42.50    |
| C      |     |     |     |   |    |        |         |        |      |          |
| ANISOU | 600 | CA  | MET | A | 59 | 7191   | 4625    | 4332   | -164 | 77 494   |
| ATOM   | 601 | C   | MET | A | 59 | 19.733 | -10.576 | 14.062 | 1.00 | 41.70    |
| C      |     |     |     |   |    |        |         |        |      |          |
| ANISOU | 601 | C   | MET | A | 59 | 6790   | 4638    | 4415   | -74  | -295 428 |
| ATOM   | 602 | O   | MET | A | 59 | 20.884 | -10.714 | 14.471 | 1.00 | 40.70    |
| O      |     |     |     |   |    |        |         |        |      |          |
| ANISOU | 602 | O   | MET | A | 59 | 6829   | 4375    | 4262   | 39   | -627 427 |
| ATOM   | 603 | CB  | MET | A | 59 | 18.259 | -12.631 | 14.260 | 1.00 | 46.54    |
| C      |     |     |     |   |    |        |         |        |      |          |
| ANISOU | 603 | CB  | MET | A | 59 | 7593   | 5102    | 4986   | -279 | 221 514  |
| ATOM   | 604 | CG  | MET | A | 59 | 19.442 | -13.600 | 14.188 | 1.00 | 52.94    |
| C      |     |     |     |   |    |        |         |        |      |          |
| ANISOU | 604 | CG  | MET | A | 59 | 8540   | 5770    | 5803   | -209 | -76 552  |
| ATOM   | 605 | SD  | MET | A | 59 | 19.685 | -14.676 | 15.626 | 1.00 | 62.96    |
| S      |     |     |     |   |    |        |         |        |      |          |
| ANISOU | 605 | SD  | MET | A | 59 | 10517  | 6681    | 6722   | -138 | -65 679  |
| ATOM   | 606 | CE  | MET | A | 59 | 18.040 | -15.418 | 15.797 | 1.00 | 61.36    |
| C      |     |     |     |   |    |        |         |        |      |          |
| ANISOU | 606 | CE  | MET | A | 59 | 10353  | 6418    | 6542   | -350 | 550 713  |

|        |     |      |     |   |    |        |         |        |      |       |     |
|--------|-----|------|-----|---|----|--------|---------|--------|------|-------|-----|
| ATOM H | 607 | H    | MET | A | 59 | 16.628 | -10.833 | 14.180 | 1.00 | 0.00  |     |
| ATOM H | 608 | HA   | MET | A | 59 | 18.846 | -11.328 | 15.885 | 1.00 | 0.00  |     |
| ATOM H | 609 | HB3  | MET | A | 59 | 17.822 | -12.523 | 13.268 | 1.00 | 0.00  |     |
| ATOM H | 610 | HB2  | MET | A | 59 | 17.455 | -13.087 | 14.838 | 1.00 | 0.00  |     |
| ATOM H | 611 | HG3  | MET | A | 59 | 20.357 | -13.037 | 14.002 | 1.00 | 0.00  |     |
| ATOM H | 612 | HG2  | MET | A | 59 | 19.350 | -14.213 | 13.292 | 1.00 | 0.00  |     |
| ATOM H | 613 | HE1  | MET | A | 59 | 18.037 | -16.105 | 16.643 | 1.00 | 0.00  |     |
| ATOM H | 614 | HE2  | MET | A | 59 | 17.302 | -14.633 | 15.964 | 1.00 | 0.00  |     |
| ATOM H | 615 | HE3  | MET | A | 59 | 17.790 | -15.963 | 14.887 | 1.00 | 0.00  |     |
| ATOM N | 616 | N    | ILE | A | 60 | 19.416 | -9.864  | 12.961 | 1.00 | 35.89 |     |
| ANISOU | 616 | N    | ILE | A | 60 | 5632   | 4117    | 3887   | -116 | -229  | 364 |
| ATOM C | 617 | CA   | ILE | A | 60 | 20.368 | -9.207  | 12.045 | 1.00 | 33.88 |     |
| ANISOU | 617 | CA   | ILE | A | 60 | 5088   | 3951    | 3835   | -56  | -451  | 302 |
| ATOM C | 618 | C    | ILE | A | 60 | 20.520 | -7.712  | 12.317 | 1.00 | 35.53 |     |
| ANISOU | 618 | C    | ILE | A | 60 | 5277   | 4207    | 4015   | 20   | -515  | 263 |
| ATOM O | 619 | O    | ILE | A | 60 | 21.644 | -7.210  | 12.387 | 1.00 | 35.49 |     |
| ANISOU | 619 | O    | ILE | A | 60 | 5246   | 4129    | 4110   | 105  | -764  | 216 |
| ATOM C | 620 | CB   | ILE | A | 60 | 19.943 | -9.455  | 10.555 | 1.00 | 36.22 |     |
| ANISOU | 620 | CB   | ILE | A | 60 | 5025   | 4408    | 4328   | -133 | -331  | 264 |
| ATOM C | 621 | CG1  | ILE | A | 60 | 19.653 | -10.968 | 10.254 | 1.00 | 38.72 |     |
| ANISOU | 621 | CG1  | ILE | A | 60 | 5347   | 4678    | 4688   | -227 | -241  | 282 |
| ATOM C | 622 | CG2  | ILE | A | 60 | 20.944 | -8.844  | 9.544  | 1.00 | 36.12 |     |
| ANISOU | 622 | CG2  | ILE | A | 60 | 4790   | 4430    | 4507   | -74  | -471  | 211 |
| ATOM C | 623 | CD1  | ILE | A | 60 | 20.797 | -11.982 | 10.493 | 1.00 | 45.36 |     |
| ANISOU | 623 | CD1  | ILE | A | 60 | 6317   | 5345    | 5574   | -193 | -426  | 309 |
| ATOM H | 624 | H    | ILE | A | 60 | 18.448 | -9.742  | 12.700 | 1.00 | 0.00  |     |
| ATOM H | 625 | HA   | ILE | A | 60 | 21.343 | -9.671  | 12.193 | 1.00 | 0.00  |     |
| ATOM H | 626 | HB   | ILE | A | 60 | 19.000 | -8.927  | 10.412 | 1.00 | 0.00  |     |
| ATOM H | 627 | HG13 | ILE | A | 60 | 19.296 | -11.067 | 9.229  | 1.00 | 0.00  |     |
| ATOM H | 628 | HG12 | ILE | A | 60 | 18.774 | -11.282 | 10.816 | 1.00 | 0.00  |     |
| ATOM H | 629 | HG21 | ILE | A | 60 | 20.603 | -9.044  | 8.528  | 1.00 | 0.00  |     |
| ATOM H | 630 | HG22 | ILE | A | 60 | 21.007 | -7.767  | 9.700  | 1.00 | 0.00  |     |

|        |     |      |     |   |    |        |         |        |      |          |
|--------|-----|------|-----|---|----|--------|---------|--------|------|----------|
| ATOM   | 631 | HG23 | ILE | A | 60 | 21.928 | -9.290  | 9.691  | 1.00 | 0.00     |
| H      |     |      |     |   |    |        |         |        |      |          |
| ATOM   | 632 | HD11 | ILE | A | 60 | 20.452 | -12.985 | 10.243 | 1.00 | 0.00     |
| H      |     |      |     |   |    |        |         |        |      |          |
| ATOM   | 633 | HD12 | ILE | A | 60 | 21.649 | -11.724 | 9.864  | 1.00 | 0.00     |
| H      |     |      |     |   |    |        |         |        |      |          |
| ATOM   | 634 | HD13 | ILE | A | 60 | 21.097 | -11.952 | 11.540 | 1.00 | 0.00     |
| H      |     |      |     |   |    |        |         |        |      |          |
| ATOM   | 635 | N    | ILE | A | 61 | 19.393 | -6.999  | 12.406 | 1.00 | 30.64    |
| N      |     |      |     |   |    |        |         |        |      |          |
| ANISOU | 635 | N    | ILE | A | 61 | 4626   | 3695    | 3318   | -13  | -285 262 |
| ATOM   | 636 | CA   | ILE | A | 61 | 19.360 | -5.544  | 12.580 | 1.00 | 29.94    |
| C      |     |      |     |   |    |        |         |        |      |          |
| ANISOU | 636 | CA   | ILE | A | 61 | 4505   | 3661    | 3211   | 52   | -297 225 |
| ATOM   | 637 | C    | ILE | A | 61 | 19.233 | -5.164  | 14.057 | 1.00 | 36.53    |
| C      |     |      |     |   |    |        |         |        |      |          |
| ANISOU | 637 | C    | ILE | A | 61 | 5735   | 4359    | 3787   | 102  | -291 239 |
| ATOM   | 638 | O    | ILE | A | 61 | 18.177 | -5.359  | 14.663 | 1.00 | 36.57    |
| O      |     |      |     |   |    |        |         |        |      |          |
| ANISOU | 638 | O    | ILE | A | 61 | 5915   | 4336    | 3643   | 52   | -15 271  |
| ATOM   | 639 | CB   | ILE | A | 61 | 18.254 | -4.931  | 11.673 | 1.00 | 31.28    |
| C      |     |      |     |   |    |        |         |        |      |          |
| ANISOU | 639 | CB   | ILE | A | 61 | 4389   | 4012    | 3484   | 16   | -85 201  |
| ATOM   | 640 | CG1  | ILE | A | 61 | 18.462 | -5.314  | 10.174 | 1.00 | 29.98    |
| C      |     |      |     |   |    |        |         |        |      |          |
| ANISOU | 640 | CG1  | ILE | A | 61 | 3940   | 3947    | 3506   | -5   | -133 181 |
| ATOM   | 641 | CG2  | ILE | A | 61 | 18.096 | -3.413  | 11.877 | 1.00 | 31.01    |
| C      |     |      |     |   |    |        |         |        |      |          |
| ANISOU | 641 | CG2  | ILE | A | 61 | 4334   | 4021    | 3429   | 89   | -65 170  |
| ATOM   | 642 | CD1  | ILE | A | 61 | 19.894 | -5.013  | 9.548  | 1.00 | 34.55    |
| C      |     |      |     |   |    |        |         |        |      |          |
| ANISOU | 642 | CD1  | ILE | A | 61 | 4435   | 4477    | 4214   | 54   | -316 160 |
| ATOM   | 643 | H    | ILE | A | 61 | 18.497 | -7.462  | 12.354 | 1.00 | 0.00     |
| H      |     |      |     |   |    |        |         |        |      |          |
| ATOM   | 644 | HA   | ILE | A | 61 | 20.316 | -5.156  | 12.229 | 1.00 | 0.00     |
| H      |     |      |     |   |    |        |         |        |      |          |
| ATOM   | 645 | HB   | ILE | A | 61 | 17.312 | -5.385  | 11.982 | 1.00 | 0.00     |
| H      |     |      |     |   |    |        |         |        |      |          |
| ATOM   | 646 | HG13 | ILE | A | 61 | 17.697 | -4.827  | 9.570  | 1.00 | 0.00     |
| H      |     |      |     |   |    |        |         |        |      |          |
| ATOM   | 647 | HG12 | ILE | A | 61 | 18.225 | -6.369  | 10.037 | 1.00 | 0.00     |
| H      |     |      |     |   |    |        |         |        |      |          |
| ATOM   | 648 | HG21 | ILE | A | 61 | 17.312 | -3.037  | 11.220 | 1.00 | 0.00     |
| H      |     |      |     |   |    |        |         |        |      |          |
| ATOM   | 649 | HG22 | ILE | A | 61 | 17.828 | -3.211  | 12.914 | 1.00 | 0.00     |
| H      |     |      |     |   |    |        |         |        |      |          |
| ATOM   | 650 | HG23 | ILE | A | 61 | 19.036 | -2.914  | 11.642 | 1.00 | 0.00     |
| H      |     |      |     |   |    |        |         |        |      |          |
| ATOM   | 651 | HD11 | ILE | A | 61 | 19.907 | -5.325  | 8.504  | 1.00 | 0.00     |
| H      |     |      |     |   |    |        |         |        |      |          |
| ATOM   | 652 | HD12 | ILE | A | 61 | 20.101 | -3.945  | 9.610  | 1.00 | 0.00     |
| H      |     |      |     |   |    |        |         |        |      |          |
| ATOM   | 653 | HD13 | ILE | A | 61 | 20.656 | -5.563  | 10.101 | 1.00 | 0.00     |
| H      |     |      |     |   |    |        |         |        |      |          |
| ATOM   | 654 | N    | LYS | A | 62 | 20.329 | -4.619  | 14.622 | 1.00 | 34.55    |
| N      |     |      |     |   |    |        |         |        |      |          |
| ANISOU | 654 | N    | LYS | A | 62 | 5631   | 3992    | 3503   | 203  | -591 196 |

|        |     |     |     |   |    |        |        |        |      |       |     |
|--------|-----|-----|-----|---|----|--------|--------|--------|------|-------|-----|
| ATOM   | 655 | CA  | LYS | A | 62 | 20.418 | -4.240 | 16.033 | 1.00 | 37.02 |     |
| C      |     |     |     |   |    |        |        |        |      |       |     |
| ANISOU | 655 | CA  | LYS | A | 62 | 6396   | 4139   | 3533   | 285  | -686  | 186 |
| ATOM   | 656 | C   | LYS | A | 62 | 20.003 | -2.797 | 16.286 | 1.00 | 43.02 |     |
| C      |     |     |     |   |    |        |        |        |      |       |     |
| ANISOU | 656 | C   | LYS | A | 62 | 7143   | 4954   | 4247   | 315  | -581  | 135 |
| ATOM   | 657 | O   | LYS | A | 62 | 19.643 | -2.452 | 17.415 | 1.00 | 45.37 |     |
| O      |     |     |     |   |    |        |        |        |      |       |     |
| ANISOU | 657 | O   | LYS | A | 62 | 7842   | 5134   | 4261   | 356  | -504  | 136 |
| ATOM   | 658 | CB  | LYS | A | 62 | 21.842 | -4.497 | 16.579 | 1.00 | 40.44 |     |
| C      |     |     |     |   |    |        |        |        |      |       |     |
| ANISOU | 658 | CB  | LYS | A | 62 | 7011   | 4376   | 3978   | 400  | -1154 | 131 |
| ATOM   | 659 | CG  | LYS | A | 62 | 22.311 | -5.952 | 16.478 | 1.00 | 45.65 |     |
| C      |     |     |     |   |    |        |        |        |      |       |     |
| ANISOU | 659 | CG  | LYS | A | 62 | 7750   | 4932   | 4664   | 399  | -1289 | 182 |
| ATOM   | 660 | CD  | LYS | A | 62 | 21.558 | -6.871 | 17.435 | 1.00 | 55.19 |     |
| C      |     |     |     |   |    |        |        |        |      |       |     |
| ANISOU | 660 | CD  | LYS | A | 62 | 9477   | 5998   | 5493   | 392  | -1111 | 287 |
| ATOM   | 661 | CE  | LYS | A | 62 | 21.293 | -8.221 | 16.830 | 1.00 | 57.40 |     |
| C      |     |     |     |   |    |        |        |        |      |       |     |
| ANISOU | 661 | CE  | LYS | A | 62 | 9654   | 6295   | 5861   | 298  | -949  | 365 |
| ATOM   | 662 | NZ  | LYS | A | 62 | 20.353 | -8.998 | 17.673 | 1.00 | 62.45 |     |
| N1+    |     |     |     |   |    |        |        |        |      |       |     |
| ANISOU | 662 | NZ  | LYS | A | 62 | 10758  | 6793   | 6177   | 253  | -629  | 468 |
| ATOM   | 663 | H   | LYS | A | 62 | 21.154 | -4.450 | 14.064 | 1.00 | 0.00  |     |
| H      |     |     |     |   |    |        |        |        |      |       |     |
| ATOM   | 664 | HA  | LYS | A | 62 | 19.733 | -4.881 | 16.589 | 1.00 | 0.00  |     |
| H      |     |     |     |   |    |        |        |        |      |       |     |
| ATOM   | 665 | HB3 | LYS | A | 62 | 21.894 | -4.172 | 17.618 | 1.00 | 0.00  |     |
| H      |     |     |     |   |    |        |        |        |      |       |     |
| ATOM   | 666 | HB2 | LYS | A | 62 | 22.550 | -3.853 | 16.058 | 1.00 | 0.00  |     |
| H      |     |     |     |   |    |        |        |        |      |       |     |
| ATOM   | 667 | HG3 | LYS | A | 62 | 23.379 | -6.004 | 16.690 | 1.00 | 0.00  |     |
| H      |     |     |     |   |    |        |        |        |      |       |     |
| ATOM   | 668 | HG2 | LYS | A | 62 | 22.178 | -6.306 | 15.456 | 1.00 | 0.00  |     |
| H      |     |     |     |   |    |        |        |        |      |       |     |
| ATOM   | 669 | HD3 | LYS | A | 62 | 20.612 | -6.407 | 17.714 | 1.00 | 0.00  |     |
| H      |     |     |     |   |    |        |        |        |      |       |     |
| ATOM   | 670 | HD2 | LYS | A | 62 | 22.135 | -6.992 | 18.352 | 1.00 | 0.00  |     |
| H      |     |     |     |   |    |        |        |        |      |       |     |
| ATOM   | 671 | HE3 | LYS | A | 62 | 22.232 | -8.767 | 16.735 | 1.00 | 0.00  |     |
| H      |     |     |     |   |    |        |        |        |      |       |     |
| ATOM   | 672 | HE2 | LYS | A | 62 | 20.868 | -8.095 | 15.834 | 1.00 | 0.00  |     |
| H      |     |     |     |   |    |        |        |        |      |       |     |
| ATOM   | 673 | HZ1 | LYS | A | 62 | 19.514 | -8.458 | 17.828 | 1.00 | 0.00  |     |
| H      |     |     |     |   |    |        |        |        |      |       |     |
| ATOM   | 674 | HZ2 | LYS | A | 62 | 20.116 | -9.861 | 17.206 | 1.00 | 0.00  |     |
| H      |     |     |     |   |    |        |        |        |      |       |     |
| ATOM   | 675 | HZ3 | LYS | A | 62 | 20.788 | -9.205 | 18.561 | 1.00 | 0.00  |     |
| H      |     |     |     |   |    |        |        |        |      |       |     |
| ATOM   | 676 | N   | HIS | A | 63 | 20.076 | -1.944 | 15.254 | 1.00 | 38.05 |     |
| N      |     |     |     |   |    |        |        |        |      |       |     |
| ANISOU | 676 | N   | HIS | A | 63 | 6105   | 4476   | 3877   | 305  | -562  | 92  |
| ATOM   | 677 | CA  | HIS | A | 63 | 19.720 | -0.535 | 15.387 | 1.00 | 38.38 |     |
| C      |     |     |     |   |    |        |        |        |      |       |     |
| ANISOU | 677 | CA  | HIS | A | 63 | 6103   | 4565   | 3915   | 341  | -465  | 44  |

|        |     |     |     |   |    |        |        |        |      |       |      |
|--------|-----|-----|-----|---|----|--------|--------|--------|------|-------|------|
| ATOM   | 678 | C   | HIS | A | 63 | 18.645 | -0.156 | 14.352 | 1.00 | 38.60 |      |
| C      |     |     |     |   |    |        |        |        |      |       |      |
| ANISOU | 678 | C   | HIS | A | 63 | 5794   | 4787   | 4086   | 290  | -173  | 72   |
| ATOM   | 679 | O   | HIS | A | 63 | 18.957 | 0.466  | 13.326 | 1.00 | 36.29 |      |
| O      |     |     |     |   |    |        |        |        |      |       |      |
| ANISOU | 679 | O   | HIS | A | 63 | 5213   | 4579   | 3995   | 309  | -215  | 51   |
| ATOM   | 680 | CB  | HIS | A | 63 | 20.987 | 0.341  | 15.325 | 1.00 | 39.98 |      |
| C      |     |     |     |   |    |        |        |        |      |       |      |
| ANISOU | 680 | CB  | HIS | A | 63 | 6208   | 4688   | 4293   | 414  | -771  | -54  |
| ATOM   | 681 | CG  | HIS | A | 63 | 22.049 | -0.091 | 16.297 | 1.00 | 46.19 |      |
| C      |     |     |     |   |    |        |        |        |      |       |      |
| ANISOU | 681 | CG  | HIS | A | 63 | 7286   | 5261   | 5001   | 488  | -1150 | -117 |
| ATOM   | 682 | ND1 | HIS | A | 63 | 23.159 | -0.839 | 16.092 | 1.00 | 50.96 |      |
| N      |     |     |     |   |    |        |        |        |      |       |      |
| ANISOU | 682 | ND1 | HIS | A | 63 | 8350   | 5714   | 5297   | 565  | -1261 | -156 |
| ATOM   | 683 | CD2 | HIS | A | 63 | 21.966 | 0.221  | 17.645 | 1.00 | 48.91 |      |
| C      |     |     |     |   |    |        |        |        |      |       |      |
| ANISOU | 683 | CD2 | HIS | A | 63 | 7545   | 5501   | 5538   | 513  | -1451 | -156 |
| ATOM   | 684 | CE1 | HIS | A | 63 | 23.784 | -0.969 | 17.317 | 1.00 | 52.25 |      |
| C      |     |     |     |   |    |        |        |        |      |       |      |
| ANISOU | 684 | CE1 | HIS | A | 63 | 8706   | 5686   | 5461   | 648  | -1682 | -221 |
| ATOM   | 685 | NE2 | HIS | A | 63 | 23.036 | -0.321 | 18.209 | 1.00 | 51.48 |      |
| N      |     |     |     |   |    |        |        |        |      |       |      |
| ANISOU | 685 | NE2 | HIS | A | 63 | 8260   | 5609   | 5692   | 620  | -1811 | -227 |
| ATOM   | 686 | H   | HIS | A | 63 | 20.385 | -2.271 | 14.350 | 1.00 | 0.00  |      |
| H      |     |     |     |   |    |        |        |        |      |       |      |
| ATOM   | 687 | HA  | HIS | A | 63 | 19.281 | -0.402 | 16.376 | 1.00 | 0.00  |      |
| H      |     |     |     |   |    |        |        |        |      |       |      |
| ATOM   | 688 | HB3 | HIS | A | 63 | 20.719 | 1.379  | 15.520 | 1.00 | 0.00  |      |
| H      |     |     |     |   |    |        |        |        |      |       |      |
| ATOM   | 689 | HB2 | HIS | A | 63 | 21.392 | 0.320  | 14.313 | 1.00 | 0.00  |      |
| H      |     |     |     |   |    |        |        |        |      |       |      |
| ATOM   | 690 | HD2 | HIS | A | 63 | 21.187 | 0.762  | 17.991 | 1.00 | 0.00  |      |
| H      |     |     |     |   |    |        |        |        |      |       |      |
| ATOM   | 691 | HE1 | HIS | A | 63 | 24.648 | -1.487 | 17.391 | 1.00 | 0.00  |      |
| H      |     |     |     |   |    |        |        |        |      |       |      |
| ATOM   | 692 | HE2 | HIS | A | 63 | 23.205 | -0.204 | 19.269 | 1.00 | 0.00  |      |
| H      |     |     |     |   |    |        |        |        |      |       |      |
| ATOM   | 693 | N   | PRO | A | 64 | 17.371 | -0.573 | 14.578 | 1.00 | 35.79 |      |
| N      |     |     |     |   |    |        |        |        |      |       |      |
| ANISOU | 693 | N   | PRO | A | 64 | 5479   | 4471   | 3649   | 231  | 124   | 107  |
| ATOM   | 694 | CA  | PRO | A | 64 | 16.321 | -0.278 | 13.584 | 1.00 | 34.97 |      |
| C      |     |     |     |   |    |        |        |        |      |       |      |
| ANISOU | 694 | CA  | PRO | A | 64 | 5027   | 4526   | 3734   | 205  | 318   | 100  |
| ATOM   | 695 | C   | PRO | A | 64 | 15.984 | 1.207  | 13.459 | 1.00 | 37.51 |      |
| C      |     |     |     |   |    |        |        |        |      |       |      |
| ANISOU | 695 | C   | PRO | A | 64 | 5244   | 4896   | 4112   | 281  | 378   | 60   |
| ATOM   | 696 | O   | PRO | A | 64 | 16.183 | 1.978  | 14.398 | 1.00 | 37.40 |      |
| O      |     |     |     |   |    |        |        |        |      |       |      |
| ANISOU | 696 | O   | PRO | A | 64 | 5462   | 4788   | 3962   | 325  | 388   | 32   |
| ATOM   | 697 | CB  | PRO | A | 64 | 15.119 | -1.099 | 14.070 | 1.00 | 38.37 |      |
| C      |     |     |     |   |    |        |        |        |      |       |      |
| ANISOU | 697 | CB  | PRO | A | 64 | 5519   | 4922   | 4138   | 119  | 620   | 112  |
| ATOM   | 698 | CG  | PRO | A | 64 | 15.340 | -1.273 | 15.528 | 1.00 | 45.18 |      |
| C      |     |     |     |   |    |        |        |        |      |       |      |
| ANISOU | 698 | CG  | PRO | A | 64 | 6857   | 5594   | 4714   | 125  | 692   | 134  |

|        |     |     |     |   |    |        |        |        |      |       |     |
|--------|-----|-----|-----|---|----|--------|--------|--------|------|-------|-----|
| ATOM C | 699 | CD  | PRO | A | 64 | 16.830 | -1.341 | 15.723 | 1.00 | 40.06 |     |
| ANISOU | 699 | CD  | PRO | A | 64 | 6391   | 4875   | 3956   | 192  | 306   | 142 |
| ATOM H | 700 | HA  | PRO | A | 64 | 16.638 | -0.654 | 12.611 | 1.00 | 0.00  |     |
| ATOM H | 701 | HB3 | PRO | A | 64 | 15.128 | -2.075 | 13.584 | 1.00 | 0.00  |     |
| ATOM H | 702 | HB2 | PRO | A | 64 | 14.204 | -0.530 | 13.909 | 1.00 | 0.00  |     |
| ATOM H | 703 | HG3 | PRO | A | 64 | 14.889 | -2.210 | 15.853 | 1.00 | 0.00  |     |
| ATOM H | 704 | HG2 | PRO | A | 64 | 14.944 | -0.408 | 16.060 | 1.00 | 0.00  |     |
| ATOM H | 705 | HD2 | PRO | A | 64 | 17.095 | -0.837 | 16.652 | 1.00 | 0.00  |     |
| ATOM H | 706 | HD3 | PRO | A | 64 | 17.156 | -2.378 | 15.648 | 1.00 | 0.00  |     |
| ATOM N | 707 | N   | MET | A | 65 | 15.498 | 1.604  | 12.282 | 1.00 | 32.40 |     |
| ANISOU | 707 | N   | MET | A | 65 | 4284   | 4376   | 3650   | 310  | 391   | 51  |
| ATOM C | 708 | CA  | MET | A | 65 | 15.102 | 2.986  | 11.984 | 1.00 | 31.40 |     |
| ANISOU | 708 | CA  | MET | A | 65 | 4043   | 4290   | 3598   | 401  | 438   | 23  |
| ATOM C | 709 | C   | MET | A | 65 | 14.086 | 2.960  | 10.854 | 1.00 | 35.77 |     |
| ANISOU | 709 | C   | MET | A | 65 | 4303   | 4957   | 4331   | 434  | 472   | 8   |
| ATOM O | 710 | O   | MET | A | 65 | 14.108 | 2.051  | 10.025 | 1.00 | 34.52 |     |
| ANISOU | 710 | O   | MET | A | 65 | 4031   | 4855   | 4230   | 400  | 379   | 19  |
| ATOM C | 711 | CB  | MET | A | 65 | 16.329 | 3.857  | 11.625 | 1.00 | 31.97 |     |
| ANISOU | 711 | CB  | MET | A | 65 | 4142   | 4321   | 3686   | 463  | 260   | 24  |
| ATOM C | 712 | CG  | MET | A | 65 | 16.051 | 5.377  | 11.596 | 1.00 | 35.05 |     |
| ANISOU | 712 | CG  | MET | A | 65 | 4504   | 4698   | 4116   | 558  | 328   | -3  |
| ATOM S | 713 | SD  | MET | A | 65 | 15.170 | 6.058  | 13.032 | 1.00 | 40.48 |     |
| ANISOU | 713 | SD  | MET | A | 65 | 5368   | 5320   | 4694   | 571  | 539   | -54 |
| ATOM C | 714 | CE  | MET | A | 65 | 16.368 | 5.758  | 14.355 | 1.00 | 38.38 |     |
| ANISOU | 714 | CE  | MET | A | 65 | 5475   | 4894   | 4213   | 532  | 385   | -85 |
| ATOM H | 715 | H   | MET | A | 65 | 15.384 | 0.937  | 11.532 | 1.00 | 0.00  |     |
| ATOM H | 716 | HA  | MET | A | 65 | 14.625 | 3.408  | 12.869 | 1.00 | 0.00  |     |
| ATOM H | 717 | HB3 | MET | A | 65 | 16.724 | 3.544  | 10.658 | 1.00 | 0.00  |     |
| ATOM H | 718 | HB2 | MET | A | 65 | 17.136 | 3.651  | 12.328 | 1.00 | 0.00  |     |
| ATOM H | 719 | HG3 | MET | A | 65 | 15.503 | 5.625  | 10.687 | 1.00 | 0.00  |     |
| ATOM H | 720 | HG2 | MET | A | 65 | 16.992 | 5.912  | 11.465 | 1.00 | 0.00  |     |
| ATOM H | 721 | HE1 | MET | A | 65 | 15.966 | 6.124  | 15.300 | 1.00 | 0.00  |     |
| ATOM H | 722 | HE2 | MET | A | 65 | 16.563 | 4.688  | 14.434 | 1.00 | 0.00  |     |

|          |     |     |     |   |    |        |       |        |      |       |      |
|----------|-----|-----|-----|---|----|--------|-------|--------|------|-------|------|
| ATOM H   | 723 | HE3 | MET | A | 65 | 17.298 | 6.281 | 14.129 | 1.00 | 0.00  |      |
| ATOM N   | 724 | N   | ASP | A | 66 | 13.187 | 3.942 | 10.842 | 1.00 | 34.03 |      |
| ANISOU   | 724 | N   | ASP | A | 66 | 3972   | 4753  | 4206   | 512  | 580   | -32  |
| ATOM C   | 725 | CA  | ASP | A | 66 | 12.115 | 4.084 | 9.855  | 1.00 | 34.64 |      |
| ANISOU   | 725 | CA  | ASP | A | 66 | 3771   | 4906  | 4484   | 586  | 549   | -76  |
| ATOM C   | 726 | C   | ASP | A | 66 | 11.673 | 5.541 | 9.850  | 1.00 | 38.77 |      |
| ANISOU   | 726 | C   | ASP | A | 66 | 4250   | 5409  | 5071   | 720  | 589   | -99  |
| ATOM O   | 727 | O   | ASP | A | 66 | 11.977 | 6.266 | 10.801 | 1.00 | 37.74 |      |
| ANISOU   | 727 | O   | ASP | A | 66 | 4288   | 5207  | 4843   | 719  | 711   | -96  |
| ATOM C   | 728 | CB  | ASP | A | 66 | 10.928 | 3.161 | 10.201 | 1.00 | 37.79 |      |
| ANISOU   | 728 | CB  | ASP | A | 66 | 3996   | 5297  | 5065   | 499  | 715   | -151 |
| ATOM C   | 729 | CG  | ASP | A | 66 | 10.286 | 3.474 | 11.538 | 1.00 | 48.72 |      |
| ANISOU   | 729 | CG  | ASP | A | 66 | 5466   | 6577  | 6470   | 452  | 1043  | -191 |
| ATOM O   | 730 | OD1 | ASP | A | 66 | 10.803 | 2.999 | 12.566 | 1.00 | 50.20 |      |
| ANISOU   | 730 | OD1 | ASP | A | 66 | 5948   | 6678  | 6447   | 361  | 1173  | -148 |
| ATOM O1- | 731 | OD2 | ASP | A | 66 | 9.292  | 4.235 | 11.557 | 1.00 | 49.72 |      |
| ANISOU   | 731 | OD2 | ASP | A | 66 | 5398   | 6682  | 6812   | 524  | 1165  | -269 |
| ATOM H   | 732 | H   | ASP | A | 66 | 13.215 | 4.661 | 11.551 | 1.00 | 0.00  |      |
| ATOM H   | 733 | HA  | ASP | A | 66 | 12.498 | 3.822 | 8.869  | 1.00 | 0.00  |      |
| ATOM H   | 734 | HB3 | ASP | A | 66 | 11.263 | 2.124 | 10.194 | 1.00 | 0.00  |      |
| ATOM H   | 735 | HB2 | ASP | A | 66 | 10.176 | 3.228 | 9.414  | 1.00 | 0.00  |      |
| ATOM N   | 736 | N   | PHE | A | 67 | 10.942 | 5.958 | 8.801  | 1.00 | 36.83 |      |
| ANISOU   | 736 | N   | PHE | A | 67 | 3805   | 5207  | 4980   | 849  | 460   | -131 |
| ATOM C   | 737 | CA  | PHE | A | 67 | 10.434 | 7.329 | 8.637  | 1.00 | 37.69 |      |
| ANISOU   | 737 | CA  | PHE | A | 67 | 3862   | 5283  | 5175   | 1009 | 464   | -151 |
| ATOM C   | 738 | C   | PHE | A | 67 | 9.559  | 7.819 | 9.791  | 1.00 | 44.03 |      |
| ANISOU   | 738 | C   | PHE | A | 67 | 4589   | 6022  | 6119   | 992  | 734   | -229 |
| ATOM O   | 739 | O   | PHE | A | 67 | 9.658  | 8.989 | 10.163 | 1.00 | 44.48 |      |
| ANISOU   | 739 | O   | PHE | A | 67 | 4740   | 6020  | 6140   | 1070 | 815   | -222 |
| ATOM C   | 740 | CB  | PHE | A | 67 | 9.687  | 7.485 | 7.303  | 1.00 | 40.79 |      |
| ANISOU   | 740 | CB  | PHE | A | 67 | 4079   | 5708  | 5711   | 1174 | 216   | -188 |
| ATOM C   | 741 | CG  | PHE | A | 67 | 10.541 | 7.528 | 6.054  | 1.00 | 41.29 |      |
| ANISOU   | 741 | CG  | PHE | A | 67 | 4331   | 5778  | 5578   | 1258 | -6    | -100 |
| ATOM C   | 742 | CD1 | PHE | A | 67 | 11.688 | 8.315 | 6.001  | 1.00 | 42.59 |      |
| ANISOU   | 742 | CD1 | PHE | A | 67 | 4747   | 5878  | 5557   | 1283 | 51    | -3   |
| ATOM C   | 743 | CD2 | PHE | A | 67 | 10.152 | 6.854 | 4.904  | 1.00 | 44.08 |      |

|        |     |     |     |   |    |        |       |        |      |       |      |
|--------|-----|-----|-----|---|----|--------|-------|--------|------|-------|------|
| ANISOU | 743 | CD2 | PHE | A | 67 | 4627   | 6167  | 5954   | 1323 | -255  | -134 |
| ATOM   | 744 | CE1 | PHE | A | 67 | 12.449 | 8.392 | 4.833  | 1.00 | 43.44 |      |
| C      |     |     |     |   |    |        |       |        |      |       |      |
| ANISOU | 744 | CE1 | PHE | A | 67 | 5058   | 5941  | 5508   | 1356 | -62   | 74   |
| ATOM   | 745 | CE2 | PHE | A | 67 | 10.915 | 6.929 | 3.736  | 1.00 | 46.34 |      |
| C      |     |     |     |   |    |        |       |        |      |       |      |
| ANISOU | 745 | CE2 | PHE | A | 67 | 5169   | 6420  | 6019   | 1413 | -407  | -52  |
| ATOM   | 746 | CZ  | PHE | A | 67 | 12.051 | 7.706 | 3.704  | 1.00 | 43.23 |      |
| C      |     |     |     |   |    |        |       |        |      |       |      |
| ANISOU | 746 | CZ  | PHE | A | 67 | 5035   | 5946  | 5447   | 1427 | -275  | 58   |
| ATOM   | 747 | H   | PHE | A | 67 | 10.709 | 5.313 | 8.060  | 1.00 | 0.00  |      |
| H      |     |     |     |   |    |        |       |        |      |       |      |
| ATOM   | 748 | HA  | PHE | A | 67 | 11.302 | 7.987 | 8.594  | 1.00 | 0.00  |      |
| H      |     |     |     |   |    |        |       |        |      |       |      |
| ATOM   | 749 | HB3 | PHE | A | 67 | 9.064  | 8.378 | 7.343  | 1.00 | 0.00  |      |
| H      |     |     |     |   |    |        |       |        |      |       |      |
| ATOM   | 750 | HB2 | PHE | A | 67 | 8.951  | 6.686 | 7.208  | 1.00 | 0.00  |      |
| H      |     |     |     |   |    |        |       |        |      |       |      |
| ATOM   | 751 | HD1 | PHE | A | 67 | 11.999 | 8.876 | 6.870  | 1.00 | 0.00  |      |
| H      |     |     |     |   |    |        |       |        |      |       |      |
| ATOM   | 752 | HD2 | PHE | A | 67 | 9.249  | 6.262 | 4.905  | 1.00 | 0.00  |      |
| H      |     |     |     |   |    |        |       |        |      |       |      |
| ATOM   | 753 | HE1 | PHE | A | 67 | 13.349 | 8.988 | 4.813  | 1.00 | 0.00  |      |
| H      |     |     |     |   |    |        |       |        |      |       |      |
| ATOM   | 754 | HE2 | PHE | A | 67 | 10.614 | 6.377 | 2.858  | 1.00 | 0.00  |      |
| H      |     |     |     |   |    |        |       |        |      |       |      |
| ATOM   | 755 | HZ  | PHE | A | 67 | 12.631 | 7.779 | 2.796  | 1.00 | 0.00  |      |
| H      |     |     |     |   |    |        |       |        |      |       |      |
| ATOM   | 756 | N   | GLY | A | 68 | 8.712  | 6.932 | 10.322 | 1.00 | 41.71 |      |
| N      |     |     |     |   |    |        |       |        |      |       |      |
| ANISOU | 756 | N   | GLY | A | 68 | 4138   | 5712  | 5999   | 886  | 908   | -308 |
| ATOM   | 757 | CA  | GLY | A | 68 | 7.801  | 7.220 | 11.429 | 1.00 | 43.61 |      |
| C      |     |     |     |   |    |        |       |        |      |       |      |
| ANISOU | 757 | CA  | GLY | A | 68 | 4318   | 5847  | 6404   | 847  | 1262  | -394 |
| ATOM   | 758 | C   | GLY | A | 68 | 8.535  | 7.562 | 12.708 | 1.00 | 46.39 |      |
| C      |     |     |     |   |    |        |       |        |      |       |      |
| ANISOU | 758 | C   | GLY | A | 68 | 5055   | 6113  | 6459   | 777  | 1481  | -343 |
| ATOM   | 759 | O   | GLY | A | 68 | 8.168  | 8.524 | 13.389 | 1.00 | 47.19 |      |
| O      |     |     |     |   |    |        |       |        |      |       |      |
| ANISOU | 759 | O   | GLY | A | 68 | 5213   | 6124  | 6592   | 830  | 1688  | -387 |
| ATOM   | 760 | H   | GLY | A | 68 | 8.673  | 5.991 | 9.958  | 1.00 | 0.00  |      |
| H      |     |     |     |   |    |        |       |        |      |       |      |
| ATOM   | 761 | HA3 | GLY | A | 68 | 7.156  | 6.358 | 11.601 | 1.00 | 0.00  |      |
| H      |     |     |     |   |    |        |       |        |      |       |      |
| ATOM   | 762 | HA2 | GLY | A | 68 | 7.147  | 8.048 | 11.154 | 1.00 | 0.00  |      |
| H      |     |     |     |   |    |        |       |        |      |       |      |
| ATOM   | 763 | N   | THR | A | 69 | 9.605  | 6.793 | 13.019 | 1.00 | 41.36 |      |
| N      |     |     |     |   |    |        |       |        |      |       |      |
| ANISOU | 763 | N   | THR | A | 69 | 4696   | 5485  | 5534   | 674  | 1400  | -263 |
| ATOM   | 764 | CA  | THR | A | 69 | 10.460 | 7.026 | 14.187 | 1.00 | 41.20 |      |
| C      |     |     |     |   |    |        |       |        |      |       |      |
| ANISOU | 764 | CA  | THR | A | 69 | 5088   | 5365  | 5201   | 629  | 1484  | -230 |
| ATOM   | 7   |     |     |   |    |        |       |        |      |       |      |

|        |     |      |     |   |    |        |        |        |      |       |      |
|--------|-----|------|-----|---|----|--------|--------|--------|------|-------|------|
| ANISOU | 766 | O    | THR | A | 69 | 5797   | 5651   | 5408   | 760  | 1477  | -255 |
| ATOM   | 767 | CB   | THR | A | 69 | 11.435 | 5.852  | 14.388 | 1.00 | 46.80 |      |
| C      |     |      |     |   |    |        |        |        |      |       |      |
| ANISOU | 767 | CB   | THR | A | 69 | 6020   | 6072   | 5690   | 525  | 1345  | -165 |
| ATOM   | 768 | OG1  | THR | A | 69 | 10.669 | 4.682  | 14.652 | 1.00 | 47.40 |      |
| O      |     |      |     |   |    |        |        |        |      |       |      |
| ANISOU | 768 | OG1  | THR | A | 69 | 6046   | 6114   | 5850   | 418  | 1560  | -181 |
| ATOM   | 769 | CG2  | THR | A | 69 | 12.401 | 6.073  | 15.551 | 1.00 | 44.89 |      |
| C      |     |      |     |   |    |        |        |        |      |       |      |
| ANISOU | 769 | CG2  | THR | A | 69 | 6226   | 5702   | 5126   | 512  | 1317  | -152 |
| ATOM   | 770 | H    | THR | A | 69 | 9.851  | 6.009  | 12.432 | 1.00 | 0.00  |      |
| H      |     |      |     |   |    |        |        |        |      |       |      |
| ATOM   | 771 | HA   | THR | A | 69 | 9.817  | 7.080  | 15.066 | 1.00 | 0.00  |      |
| H      |     |      |     |   |    |        |        |        |      |       |      |
| ATOM   | 772 | HB   | THR | A | 69 | 12.008 | 5.704  | 13.472 | 1.00 | 0.00  |      |
| H      |     |      |     |   |    |        |        |        |      |       |      |
| ATOM   | 773 | HG1  | THR | A | 69 | 10.204 | 4.417  | 13.855 | 1.00 | 0.00  |      |
| H      |     |      |     |   |    |        |        |        |      |       |      |
| ATOM   | 774 | HG21 | THR | A | 69 | 13.063 | 5.212  | 15.643 | 1.00 | 0.00  |      |
| H      |     |      |     |   |    |        |        |        |      |       |      |
| ATOM   | 775 | HG22 | THR | A | 69 | 12.994 | 6.969  | 15.366 | 1.00 | 0.00  |      |
| H      |     |      |     |   |    |        |        |        |      |       |      |
| ATOM   | 776 | HG23 | THR | A | 69 | 11.836 | 6.196  | 16.475 | 1.00 | 0.00  |      |
| H      |     |      |     |   |    |        |        |        |      |       |      |
| ATOM   | 777 | N    | MET | A | 70 | 11.651 | 8.680  | 12.810 | 1.00 | 37.12 |      |
| N      |     |      |     |   |    |        |        |        |      |       |      |
| ANISOU | 777 | N    | MET | A | 70 | 4493   | 4933   | 4679   | 816  | 1071  | -173 |
| ATOM   | 778 | CA   | MET | A | 70 | 12.290 | 9.956  | 12.493 | 1.00 | 35.59 |      |
| C      |     |      |     |   |    |        |        |        |      |       |      |
| ANISOU | 778 | CA   | MET | A | 70 | 4355   | 4706   | 4463   | 918  | 965   | -157 |
| ATOM   | 779 | C    | MET | A | 70 | 11.280 | 11.109 | 12.635 | 1.00 | 41.05 |      |
| C      |     |      |     |   |    |        |        |        |      |       |      |
| ANISOU | 779 | C    | MET | A | 70 | 4942   | 5353   | 5303   | 1034 | 1129  | -211 |
| ATOM   | 780 | O    | MET | A | 70 | 11.620 | 12.151 | 13.197 | 1.00 | 40.21 |      |
| O      |     |      |     |   |    |        |        |        |      |       |      |
| ANISOU | 780 | O    | MET | A | 70 | 4991   | 5156   | 5132   | 1076 | 1187  | -233 |
| ATOM   | 781 | CB   | MET | A | 70 | 12.861 | 9.923  | 11.081 | 1.00 | 36.13 |      |
| C      |     |      |     |   |    |        |        |        |      |       |      |
| ANISOU | 781 | CB   | MET | A | 70 | 4315   | 4837   | 4575   | 975  | 740   | -90  |
| ATOM   | 782 | CG   | MET | A | 70 | 14.113 | 9.064  | 10.963 | 1.00 | 37.94 |      |
| C      |     |      |     |   |    |        |        |        |      |       |      |
| ANISOU | 782 | CG   | MET | A | 70 | 4654   | 5066   | 4696   | 873  | 598   | -50  |
| ATOM   | 783 | SD   | MET | A | 70 | 14.535 | 8.741  | 9.245  | 1.00 | 40.54 |      |
| S      |     |      |     |   |    |        |        |        |      |       |      |
| ANISOU | 783 | SD   | MET | A | 70 | 4880   | 5449   | 5073   | 925  | 432   | 21   |
| ATOM   | 784 | CE   | MET | A | 70 | 15.138 | 10.287 | 8.746  | 1.00 | 38.02 |      |
| C      |     |      |     |   |    |        |        |        |      |       |      |
| ANISOU | 784 | CE   | MET | A | 70 | 4651   | 5012   | 4781   | 1041 | 454   | 48   |
| ATOM   | 785 | H    | MET | A | 70 | 11.592 | 8.005  | 12.061 | 1.00 | 0.00  |      |
| H      |     |      |     |   |    |        |        |        |      |       |      |
| ATOM   | 786 | HA   | MET | A | 70 | 13.107 | 10.120 | 13.195 | 1.00 | 0.00  |      |
| H      |     |      |     |   |    |        |        |        |      |       |      |

|          |     |     |     |   |    |        |        |        |      |       |      |
|----------|-----|-----|-----|---|----|--------|--------|--------|------|-------|------|
| ATOM H   | 789 | HG3 | MET | A | 70 | 13.954 | 8.118  | 11.481 | 1.00 | 0.00  |      |
| ATOM H   | 790 | HG2 | MET | A | 70 | 14.946 | 9.568  | 11.453 | 1.00 | 0.00  |      |
| ATOM H   | 791 | HE1 | MET | A | 70 | 15.439 | 10.240 | 7.699  | 1.00 | 0.00  |      |
| ATOM H   | 792 | HE2 | MET | A | 70 | 14.357 | 11.038 | 8.865  | 1.00 | 0.00  |      |
| ATOM H   | 793 | HE3 | MET | A | 70 | 15.998 | 10.557 | 9.359  | 1.00 | 0.00  |      |
| ATOM N   | 794 | N   | LYS | A | 71 | 10.032 | 10.904 | 12.156 | 1.00 | 39.90 |      |
| ANISOU   | 794 | N   | LYS | A | 71 | 4514   | 5251   | 5395   | 1088 | 1189  | -252 |
| ATOM C   | 795 | CA  | LYS | A | 71 | 8.954  | 11.896 | 12.261 | 1.00 | 41.54 |      |
| ANISOU   | 795 | CA  | LYS | A | 71 | 4553   | 5399   | 5830   | 1212 | 1335  | -325 |
| ATOM C   | 796 | C   | LYS | A | 71 | 8.704  | 12.259 | 13.732 | 1.00 | 47.90 |      |
| ANISOU   | 796 | C   | LYS | A | 71 | 5547   | 6078   | 6573   | 1148 | 1682  | -392 |
| ATOM O   | 797 | O   | LYS | A | 71 | 8.666  | 13.447 | 14.055 | 1.00 | 47.43 |      |
| ANISOU   | 797 | O   | LYS | A | 71 | 5564   | 5936   | 6521   | 1238 | 1770  | -421 |
| ATOM C   | 798 | CB  | LYS | A | 71 | 7.663  | 11.395 | 11.570 | 1.00 | 45.53 |      |
| ANISOU   | 798 | CB  | LYS | A | 71 | 4673   | 5945   | 6680   | 1270 | 1296  | -399 |
| ATOM C   | 799 | CG  | LYS | A | 71 | 6.437  | 12.314 | 11.718 | 1.00 | 59.48 |      |
| ANISOU   | 799 | CG  | LYS | A | 71 | 6191   | 7623   | 8788   | 1407 | 1441  | -509 |
| ATOM C   | 800 | CD  | LYS | A | 71 | 6.551  | 13.628 | 10.941 | 1.00 | 66.66 |      |
| ANISOU   | 800 | CD  | LYS | A | 71 | 7102   | 8512   | 9713   | 1626 | 1218  | -469 |
| ATOM C   | 801 | CE  | LYS | A | 71 | 5.363  | 14.525 | 11.198 | 1.00 | 78.71 |      |
| ANISOU   | 801 | CE  | LYS | A | 71 | 8384   | 9926   | 11596  | 1769 | 1365  | -585 |
| ATOM N1+ | 802 | NZ  | LYS | A | 71 | 5.461  | 15.802 | 10.445 | 1.00 | 85.73 |      |
| ANISOU   | 802 | NZ  | LYS | A | 71 | 9326   | 10769  | 12477  | 1999 | 1148  | -533 |
| ATOM H   | 803 | H   | LYS | A | 71 | 9.803  | 10.033 | 11.698 | 1.00 | 0.00  |      |
| ATOM H   | 804 | HA  | LYS | A | 71 | 9.280  | 12.799 | 11.745 | 1.00 | 0.00  |      |
| ATOM H   | 805 | HB3 | LYS | A | 71 | 7.416  | 10.402 | 11.945 | 1.00 | 0.00  |      |
| ATOM H   | 806 | HB2 | LYS | A | 71 | 7.862  | 11.228 | 10.511 | 1.00 | 0.00  |      |
| ATOM H   | 807 | HG3 | LYS | A | 71 | 6.273  | 12.531 | 12.774 | 1.00 | 0.00  |      |
| ATOM H   | 808 | HG2 | LYS | A | 71 | 5.544  | 11.780 | 11.395 | 1.00 | 0.00  |      |
| ATOM H   | 809 | HD3 | LYS | A | 71 | 6.620  | 13.414 | 9.874  | 1.00 | 0.00  |      |
| ATOM H   | 810 | HD2 | LYS | A | 71 | 7.465  | 14.144 | 11.233 | 1.00 | 0.00  |      |
| ATOM H   | 811 | HE3 | LYS | A | 71 | 5.293  | 14.738 | 12.265 | 1.00 | 0.00  |      |
| ATOM H   | 812 | HE2 | LYS | A | 71 | 4.448  | 14.005 | 10.913 | 1.00 | 0.00  |      |

|        |     |     |     |   |    |        |        |        |      |       |      |
|--------|-----|-----|-----|---|----|--------|--------|--------|------|-------|------|
| ATOM   | 813 | HZ1 | LYS | A | 71 | 5.650  | 15.606 | 9.472  | 1.00 | 0.00  |      |
| H      |     |     |     |   |    |        |        |        |      |       |      |
| ATOM   | 814 | HZ2 | LYS | A | 71 | 4.590  | 16.307 | 10.523 | 1.00 | 0.00  |      |
| H      |     |     |     |   |    |        |        |        |      |       |      |
| ATOM   | 815 | HZ3 | LYS | A | 71 | 6.210  | 16.362 | 10.827 | 1.00 | 0.00  |      |
| H      |     |     |     |   |    |        |        |        |      |       |      |
| ATOM   | 816 | N   | ASP | A | 72 | 8.593  | 11.238 | 14.618 | 1.00 | 46.37 |      |
| N      |     |     |     |   |    |        |        |        |      |       |      |
| ANISOU | 816 | N   | ASP | A | 72 | 5490   | 5846   | 6284   | 999  | 1889  | -413 |
| ATOM   | 817 | CA  | ASP | A | 72 | 8.371  | 11.420 | 16.063 | 1.00 | 48.35 |      |
| C      |     |     |     |   |    |        |        |        |      |       |      |
| ANISOU | 817 | CA  | ASP | A | 72 | 6042   | 5936   | 6393   | 934  | 2255  | -471 |
| ATOM   | 818 | C   | ASP | A | 72 | 9.537  | 12.156 | 16.711 | 1.00 | 51.29 |      |
| C      |     |     |     |   |    |        |        |        |      |       |      |
| ANISOU | 818 | C   | ASP | A | 72 | 6822   | 6242   | 6424   | 947  | 2141  | -449 |
| ATOM   | 819 | O   | ASP | A | 72 | 9.326  | 12.913 | 17.651 | 1.00 | 52.79 |      |
| O      |     |     |     |   |    |        |        |        |      |       |      |
| ANISOU | 819 | O   | ASP | A | 72 | 7245   | 6291   | 6522   | 970  | 2379  | -515 |
| ATOM   | 820 | CB  | ASP | A | 72 | 8.119  | 10.076 | 16.774 | 1.00 | 51.18 |      |
| C      |     |     |     |   |    |        |        |        |      |       |      |
| ANISOU | 820 | CB  | ASP | A | 72 | 6547   | 6235   | 6665   | 780  | 2486  | -473 |
| ATOM   | 821 | CG  | ASP | A | 72 | 6.925  | 9.284  | 16.264 | 1.00 | 62.27 |      |
| C      |     |     |     |   |    |        |        |        |      |       |      |
| ANISOU | 821 | CG  | ASP | A | 72 | 7529   | 7659   | 8473   | 739  | 2646  | -533 |
| ATOM   | 822 | OD1 | ASP | A | 72 | 5.946  | 9.911  | 15.795 | 1.00 | 63.94 |      |
| O      |     |     |     |   |    |        |        |        |      |       |      |
| ANISOU | 822 | OD1 | ASP | A | 72 | 7364   | 7858   | 9073   | 835  | 2723  | -624 |
| ATOM   | 823 | OD2 | ASP | A | 72 | 6.957  | 8.040  | 16.359 | 1.00 | 69.07 |      |
| O1-    |     |     |     |   |    |        |        |        |      |       |      |
| ANISOU | 823 | OD2 | ASP | A | 72 | 8428   | 8524   | 9294   | 616  | 2687  | -507 |
| ATOM   | 824 | H   | ASP | A | 72 | 8.662  | 10.282 | 14.299 | 1.00 | 0.00  |      |
| H      |     |     |     |   |    |        |        |        |      |       |      |
| ATOM   | 825 | HA  | ASP | A | 72 | 7.479  | 12.034 | 16.188 | 1.00 | 0.00  |      |
| H      |     |     |     |   |    |        |        |        |      |       |      |
| ATOM   | 826 | HB3 | ASP | A | 72 | 8.005  | 10.250 | 17.844 | 1.00 | 0.00  |      |
| H      |     |     |     |   |    |        |        |        |      |       |      |
| ATOM   | 827 | HB2 | ASP | A | 72 | 9.015  | 9.459  | 16.707 | 1.00 | 0.00  |      |
| H      |     |     |     |   |    |        |        |        |      |       |      |
| ATOM   | 828 | N   | LYS | A | 73 | 10.765 | 11.941 | 16.205 | 1.00 | 45.04 |      |
| N      |     |     |     |   |    |        |        |        |      |       |      |
| ANISOU | 828 | N   | LYS | A | 73 | 6103   | 5527   | 5482   | 933  | 1783  | -379 |
| ATOM   | 829 | CA  | LYS | A | 73 | 11.952 | 12.627 | 16.705 | 1.00 | 44.06 |      |
| C      |     |     |     |   |    |        |        |        |      |       |      |
| ANISOU | 829 | CA  | LYS | A | 73 | 6282   | 5321   | 5138   | 944  | 1610  | -393 |
| ATOM   | 830 | C   | LYS | A | 73 | 11.918 | 14.114 | 16.318 | 1.00 | 48.15 |      |
| C      |     |     |     |   |    |        |        |        |      |       |      |
| ANISOU | 830 | C   | LYS | A | 73 | 6695   | 5805   | 5796   | 1064 | 1602  | -422 |
| ATOM   | 831 | O   | LYS | A | 73 | 12.282 | 14.947 | 17.146 | 1.00 | 49.44 |      |
| O      |     |     |     |   |    |        |        |        |      |       |      |
| ANISOU | 831 | O   | LYS | A | 73 | 7117   | 5837   | 5829   | 1081 | 1641  | -492 |
| ATOM   | 832 | CB  | LYS | A | 73 | 13.240 | 11.927 | 16.241 | 1.00 | 44.35 |      |
| C      |     |     |     |   |    |        |        |        |      |       |      |
| ANISOU | 832 | CB  | LYS | A | 73 | 6354   | 5412   | 5084   | 888  | 1267  | -338 |
| ATOM   | 833 | CG  | LYS | A | 73 | 13.508 | 10.597 | 16.951 | 1.00 | 46.53 |      |
| C      |     |     |     |   |    |        |        |        |      |       |      |
| ANISOU | 833 | CG  | LYS | A | 73 | 6882   | 5655   | 5144   | 786  | 1243  | -324 |

|        |     |     |     |   |    |        |        |        |      |       |      |
|--------|-----|-----|-----|---|----|--------|--------|--------|------|-------|------|
| ATOM   | 834 | CD  | LYS | A | 73 | 14.808 | 9.924  | 16.498 | 1.00 | 49.29 |      |
| C      |     |     |     |   |    |        |        |        |      |       |      |
| ANISOU | 834 | CD  | LYS | A | 73 | 7224   | 6038   | 5467   | 745  | 894   | -286 |
| ATOM   | 835 | CE  | LYS | A | 73 | 16.056 | 10.559 | 17.080 | 1.00 | 58.12 |      |
| C      |     |     |     |   |    |        |        |        |      |       |      |
| ANISOU | 835 | CE  | LYS | A | 73 | 8590   | 7016   | 6476   | 764  | 640   | -364 |
| ATOM   | 836 | NZ  | LYS | A | 73 | 17.275 | 9.752  | 16.804 | 1.00 | 59.05 |      |
| N1+    |     |     |     |   |    |        |        |        |      |       |      |
| ANISOU | 836 | NZ  | LYS | A | 73 | 8679   | 7127   | 6631   | 721  | 320   | -353 |
| ATOM   | 837 | H   | LYS | A | 73 | 10.892 | 11.283 | 15.449 | 1.00 | 0.00  |      |
| H      |     |     |     |   |    |        |        |        |      |       |      |
| ATOM   | 838 | HA  | LYS | A | 73 | 11.926 | 12.573 | 17.793 | 1.00 | 0.00  |      |
| H      |     |     |     |   |    |        |        |        |      |       |      |
| ATOM   | 839 | HB3 | LYS | A | 73 | 14.089 | 12.594 | 16.391 | 1.00 | 0.00  |      |
| H      |     |     |     |   |    |        |        |        |      |       |      |
| ATOM   | 840 | HB2 | LYS | A | 73 | 13.193 | 11.759 | 15.165 | 1.00 | 0.00  |      |
| H      |     |     |     |   |    |        |        |        |      |       |      |
| ATOM   | 841 | HG3 | LYS | A | 73 | 12.671 | 9.920  | 16.779 | 1.00 | 0.00  |      |
| H      |     |     |     |   |    |        |        |        |      |       |      |
| ATOM   | 842 | HG2 | LYS | A | 73 | 13.542 | 10.762 | 18.028 | 1.00 | 0.00  |      |
| H      |     |     |     |   |    |        |        |        |      |       |      |
| ATOM   | 843 | HD3 | LYS | A | 73 | 14.866 | 9.944  | 15.410 | 1.00 | 0.00  |      |
| H      |     |     |     |   |    |        |        |        |      |       |      |
| ATOM   | 844 | HD2 | LYS | A | 73 | 14.781 | 8.868  | 16.766 | 1.00 | 0.00  |      |
| H      |     |     |     |   |    |        |        |        |      |       |      |
| ATOM   | 845 | HE3 | LYS | A | 73 | 15.935 | 10.676 | 18.157 | 1.00 | 0.00  |      |
| H      |     |     |     |   |    |        |        |        |      |       |      |
| ATOM   | 846 | HE2 | LYS | A | 73 | 16.181 | 11.559 | 16.665 | 1.00 | 0.00  |      |
| H      |     |     |     |   |    |        |        |        |      |       |      |
| ATOM   | 847 | HZ1 | LYS | A | 73 | 17.324 | 9.542  | 15.817 | 1.00 | 0.00  |      |
| H      |     |     |     |   |    |        |        |        |      |       |      |
| ATOM   | 848 | HZ2 | LYS | A | 73 | 18.095 | 10.275 | 17.077 | 1.00 | 0.00  |      |
| H      |     |     |     |   |    |        |        |        |      |       |      |
| ATOM   | 849 | HZ3 | LYS | A | 73 | 17.235 | 8.891  | 17.330 | 1.00 | 0.00  |      |
| H      |     |     |     |   |    |        |        |        |      |       |      |
| ATOM   | 850 | N   | ILE | A | 74 | 11.421 | 14.455 | 15.101 | 1.00 | 44.21 |      |
| N      |     |     |     |   |    |        |        |        |      |       |      |
| ANISOU | 850 | N   | ILE | A | 74 | 5856   | 5398   | 5545   | 1159 | 1546  | -375 |
| ATOM   | 851 | CA  | ILE | A | 74 | 11.280 | 15.858 | 14.661 | 1.00 | 44.81 |      |
| C      |     |     |     |   |    |        |        |        |      |       |      |
| ANISOU | 851 | CA  | ILE | A | 74 | 5852   | 5418   | 5758   | 1297 | 1554  | -385 |
| ATOM   | 852 | C   | ILE | A | 74 | 10.250 | 16.561 | 15.552 | 1.00 | 51.69 |      |
| C      |     |     |     |   |    |        |        |        |      |       |      |
| ANISOU | 852 | C   | ILE | A | 74 | 6753   | 6183   | 6705   | 1348 | 1870  | -479 |
| ATOM   | 853 | O   | ILE | A | 74 | 10.552 | 17.621 | 16.103 | 1.00 | 52.12 |      |
| O      |     |     |     |   |    |        |        |        |      |       |      |
| ANISOU | 853 | O   | ILE | A | 74 | 6986   | 6115   | 6700   | 1389 | 1938  | -531 |
| ATOM   | 854 | CB  | ILE | A | 74 | 10.924 | 16.030 | 13.150 | 1.00 | 47.26 |      |
| C      |     |     |     |   |    |        |        |        |      |       |      |
| ANISOU | 854 | CB  | ILE | A | 74 | 5879   | 5814   | 6265   | 1423 | 1394  | -308 |
| ATOM   | 855 | CG1 | ILE | A | 74 | 11.990 | 15.407 | 12.218 | 1.00 | 44.99 |      |
| C      |     |     |     |   |    |        |        |        |      |       |      |
| ANISOU | 855 | CG1 | ILE | A | 74 | 5614   | 5592   | 5888   | 1376 | 1148  | -218 |
| ATOM   | 856 | CG2 | ILE | A | 74 | 10.690 | 17.524 | 12.805 | 1.00 | 48.90 |      |
| C      |     |     |     |   |    |        |        |        |      |       |      |
| ANISOU | 856 | CG2 | ILE | A | 74 | 6062   | 5923   | 6596   | 1590 | 1429  | -310 |

|        |     |      |     |   |    |        |        |        |      |       |      |
|--------|-----|------|-----|---|----|--------|--------|--------|------|-------|------|
| ATOM C | 857 | CD1  | ILE | A | 74 | 11.515 | 15.229 | 10.734 | 1.00 | 50.05 |      |
| ANISOU | 857 | CD1  | ILE | A | 74 | 6061   | 6314   | 6640   | 1492 | 987   | -144 |
| ATOM H | 858 | H    | ILE | A | 74 | 11.130 | 13.735 | 14.455 | 1.00 | 0.00  |      |
| ATOM H | 859 | HA   | ILE | A | 74 | 12.240 | 16.348 | 14.826 | 1.00 | 0.00  |      |
| ATOM H | 860 | HB   | ILE | A | 74 | 9.987  | 15.503 | 12.973 | 1.00 | 0.00  |      |
| ATOM H | 861 | HG13 | ILE | A | 74 | 12.299 | 14.441 | 12.617 | 1.00 | 0.00  |      |
| ATOM H | 862 | HG12 | ILE | A | 74 | 12.891 | 16.021 | 12.238 | 1.00 | 0.00  |      |
| ATOM H | 863 | HG21 | ILE | A | 74 | 10.444 | 17.619 | 11.747 | 1.00 | 0.00  |      |
| ATOM H | 864 | HG22 | ILE | A | 74 | 9.867  | 17.912 | 13.406 | 1.00 | 0.00  |      |
| ATOM H | 865 | HG23 | ILE | A | 74 | 11.595 | 18.093 | 13.019 | 1.00 | 0.00  |      |
| ATOM H | 866 | HD11 | ILE | A | 74 | 12.319 | 14.787 | 10.145 | 1.00 | 0.00  |      |
| ATOM H | 867 | HD12 | ILE | A | 74 | 10.643 | 14.575 | 10.707 | 1.00 | 0.00  |      |
| ATOM H | 868 | HD13 | ILE | A | 74 | 11.252 | 16.201 | 10.317 | 1.00 | 0.00  |      |
| ATOM N | 869 | N    | VAL | A | 75 | 9.053  | 15.949 | 15.711 | 1.00 | 50.44 |      |
| ANISOU | 869 | N    | VAL | A | 75 | 6411   | 6043   | 6709   | 1335 | 2087  | -518 |
| ATOM C | 870 | CA   | VAL | A | 75 | 7.938  | 16.453 | 16.535 | 1.00 | 53.65 |      |
| ANISOU | 870 | CA   | VAL | A | 75 | 6796   | 6319   | 7267   | 1370 | 2472  | -624 |
| ATOM C | 871 | C    | VAL | A | 75 | 8.381  | 16.671 | 18.000 | 1.00 | 60.39 |      |
| ANISOU | 871 | C    | VAL | A | 75 | 8132   | 7016   | 7796   | 1288 | 2697  | -685 |
| ATOM O | 872 | O    | VAL | A | 75 | 8.064  | 17.711 | 18.585 | 1.00 | 61.92 |      |
| ANISOU | 872 | O    | VAL | A | 75 | 8440   | 7074   | 8014   | 1355 | 2908  | -763 |
| ATOM C | 873 | CB   | VAL | A | 75 | 6.677  | 15.538 | 16.414 | 1.00 | 59.43 |      |
| ANISOU | 873 | CB   | VAL | A | 75 | 7202   | 7069   | 8309   | 1338 | 2682  | -676 |
| ATOM C | 874 | CG1  | VAL | A | 75 | 5.563  | 15.962 | 17.377 | 1.00 | 62.79 |      |
| ANISOU | 874 | CG1  | VAL | A | 75 | 7610   | 7310   | 8937   | 1349 | 3175  | -805 |
| ATOM C | 875 | CG2  | VAL | A | 75 | 6.153  | 15.505 | 14.979 | 1.00 | 58.89 |      |
| ANISOU | 875 | CG2  | VAL | A | 75 | 6683   | 7120   | 8574   | 1465 | 2391  | -654 |
| ATOM H | 876 | H    | VAL | A | 75 | 8.868  | 15.073 | 15.244 | 1.00 | 0.00  |      |
| ATOM H | 877 | HA   | VAL | A | 75 | 7.663  | 17.429 | 16.136 | 1.00 | 0.00  |      |
| ATOM H | 878 | HB   | VAL | A | 75 | 6.977  | 14.524 | 16.680 | 1.00 | 0.00  |      |
| ATOM H | 879 | HG11 | VAL | A | 75 | 4.707  | 15.298 | 17.258 | 1.00 | 0.00  |      |
| ATOM H | 880 | HG12 | VAL | A | 75 | 5.927  | 15.904 | 18.403 | 1.00 | 0.00  |      |

|        |     |      |     |   |    |        |        |        |      |            |
|--------|-----|------|-----|---|----|--------|--------|--------|------|------------|
| ATOM   | 881 | HG13 | VAL | A | 75 | 5.262  | 16.986 | 17.156 | 1.00 | 0.00       |
| H      |     |      |     |   |    |        |        |        |      |            |
| ATOM   | 882 | HG21 | VAL | A | 75 | 5.276  | 14.860 | 14.927 | 1.00 | 0.00       |
| H      |     |      |     |   |    |        |        |        |      |            |
| ATOM   | 883 | HG22 | VAL | A | 75 | 5.881  | 16.514 | 14.668 | 1.00 | 0.00       |
| H      |     |      |     |   |    |        |        |        |      |            |
| ATOM   | 884 | HG23 | VAL | A | 75 | 6.928  | 15.117 | 14.318 | 1.00 | 0.00       |
| H      |     |      |     |   |    |        |        |        |      |            |
| ATOM   | 885 | N    | ALA | A | 76 | 9.141  | 15.713 | 18.570 | 1.00 | 56.83      |
| N      |     |      |     |   |    |        |        |        |      |            |
| ANISOU | 885 | N    | ALA | A | 76 | 7997   | 6568   | 7029   | 1161 | 2615 -655  |
| ATOM   | 886 | CA   | ALA | A | 76 | 9.634  | 15.797 | 19.952 | 1.00 | 58.65      |
| C      |     |      |     |   |    |        |        |        |      |            |
| ANISOU | 886 | CA   | ALA | A | 76 | 8776   | 6626   | 6882   | 1107 | 2736 -717  |
| ATOM   | 887 | C    | ALA | A | 76 | 10.883 | 16.688 | 20.110 | 1.00 | 62.45      |
| C      |     |      |     |   |    |        |        |        |      |            |
| ANISOU | 887 | C    | ALA | A | 76 | 9491   | 7060   | 7177   | 1143 | 2406 -746  |
| ATOM   | 888 | O    | ALA | A | 76 | 11.366 | 16.846 | 21.233 | 1.00 | 64.61      |
| O      |     |      |     |   |    |        |        |        |      |            |
| ANISOU | 888 | O    | ALA | A | 76 | 10244  | 7177   | 7130   | 1121 | 2403 -822  |
| ATOM   | 889 | CB   | ALA | A | 76 | 9.903  | 14.402 | 20.505 | 1.00 | 59.55      |
| C      |     |      |     |   |    |        |        |        |      |            |
| ANISOU | 889 | CB   | ALA | A | 76 | 9167   | 6723   | 6738   | 988  | 2755 -678  |
| ATOM   | 890 | H    | ALA | A | 76 | 9.396  | 14.890 | 18.042 | 1.00 | 0.00       |
| H      |     |      |     |   |    |        |        |        |      |            |
| ATOM   | 891 | HA   | ALA | A | 76 | 8.840  | 16.239 | 20.555 | 1.00 | 0.00       |
| H      |     |      |     |   |    |        |        |        |      |            |
| ATOM   | 892 | HB1  | ALA | A | 76 | 10.268 | 14.481 | 21.529 | 1.00 | 0.00       |
| H      |     |      |     |   |    |        |        |        |      |            |
| ATOM   | 893 | HB2  | ALA | A | 76 | 8.981  | 13.821 | 20.492 | 1.00 | 0.00       |
| H      |     |      |     |   |    |        |        |        |      |            |
| ATOM   | 894 | HB3  | ALA | A | 76 | 10.653 | 13.905 | 19.890 | 1.00 | 0.00       |
| H      |     |      |     |   |    |        |        |        |      |            |
| ATOM   | 895 | N    | ASN | A | 77 | 11.381 | 17.290 | 18.996 | 1.00 | 56.44      |
| N      |     |      |     |   |    |        |        |        |      |            |
| ANISOU | 895 | N    | ASN | A | 77 | 8417   | 6398   | 6630   | 1205 | 2141 -700  |
| ATOM   | 896 | CA   | ASN | A | 77 | 12.559 | 18.172 | 18.942 | 1.00 | 55.32      |
| C      |     |      |     |   |    |        |        |        |      |            |
| ANISOU | 896 | CA   | ASN | A | 77 | 8387   | 6189   | 6444   | 1227 | 1864 -738  |
| ATOM   | 897 | C    | ASN | A | 77 | 13.839 | 17.444 | 19.419 | 1.00 | 58.09      |
| C      |     |      |     |   |    |        |        |        |      |            |
| ANISOU | 897 | C    | ASN | A | 77 | 9010   | 6502   | 6560   | 1137 | 1544 -766  |
| ATOM   | 898 | O    | ASN | A | 77 | 14.638 | 17.992 | 20.182 | 1.00 | 58.08      |
| O      |     |      |     |   |    |        |        |        |      |            |
| ANISOU | 898 | O    | ASN | A | 77 | 9306   | 6346   | 6415   | 1137 | 1387 -880  |
| ATOM   | 899 | CB   | ASN | A | 77 | 12.304 | 19.509 | 19.689 | 1.00 | 59.18      |
| C      |     |      |     |   |    |        |        |        |      |            |
| ANISOU | 899 | CB   | ASN | A | 77 | 9067   | 6503   | 6915   | 1300 | 2049 -853  |
| ATOM   | 900 | CG   | ASN | A | 77 | 13.159 | 20.665 | 19.221 | 1.00 | 82.10      |
| C      |     |      |     |   |    |        |        |        |      |            |
| ANISOU | 900 | CG   | ASN | A | 77 | 11909  | 9337   | 9949   | 1345 | 1846 -886  |
| ATOM   | 901 | OD1  | ASN | A | 77 | 13.138 | 21.063 | 18.050 | 1.00 | 73.23      |
| O      |     |      |     |   |    |        |        |        |      |            |
| ANISOU | 901 | OD1  | ASN | A | 77 | 10471  | 8282   | 9072   | 1409 | 1801 -800  |
| ATOM   | 902 | ND2  | ASN | A | 77 | 13.897 | 21.264 | 20.144 | 1.00 | 77.97      |
| N      |     |      |     |   |    |        |        |        |      |            |
| ANISOU | 902 | ND2  | ASN | A | 77 | 11719  | 8643   | 9264   | 1322 | 1731 -1023 |

|        |     |      |     |   |    |        |        |        |      |       |      |
|--------|-----|------|-----|---|----|--------|--------|--------|------|-------|------|
| ATOM   | 903 | H    | ASN | A | 77 | 10.934 | 17.147 | 18.102 | 1.00 | 0.00  |      |
| H      |     |      |     |   |    |        |        |        |      |       |      |
| ATOM   | 904 | HA   | ASN | A | 77 | 12.714 | 18.424 | 17.893 | 1.00 | 0.00  |      |
| H      |     |      |     |   |    |        |        |        |      |       |      |
| ATOM   | 905 | HB3  | ASN | A | 77 | 12.454 | 19.359 | 20.758 | 1.00 | 0.00  |      |
| H      |     |      |     |   |    |        |        |        |      |       |      |
| ATOM   | 906 | HB2  | ASN | A | 77 | 11.252 | 19.778 | 19.598 | 1.00 | 0.00  |      |
| H      |     |      |     |   |    |        |        |        |      |       |      |
| ATOM   | 907 | HD22 | ASN | A | 77 | 14.488 | 22.043 | 19.891 | 1.00 | 0.00  |      |
| H      |     |      |     |   |    |        |        |        |      |       |      |
| ATOM   | 908 | HD21 | ASN | A | 77 | 13.868 | 20.942 | 21.101 | 1.00 | 0.00  |      |
| H      |     |      |     |   |    |        |        |        |      |       |      |
| ATOM   | 909 | N    | GLU | A | 78 | 14.018 | 16.197 | 18.936 | 1.00 | 53.42 |      |
| N      |     |      |     |   |    |        |        |        |      |       |      |
| ANISOU | 909 | N    | GLU | A | 78 | 8302   | 6038   | 5959   | 1071 | 1419  | -675 |
| ATOM   | 910 | CA   | GLU | A | 78 | 15.136 | 15.311 | 19.259 | 1.00 | 52.91 |      |
| C      |     |      |     |   |    |        |        |        |      |       |      |
| ANISOU | 910 | CA   | GLU | A | 78 | 8434   | 5945   | 5725   | 1000 | 1102  | -688 |
| ATOM   | 911 | C    | GLU | A | 78 | 16.341 | 15.458 | 18.332 | 1.00 | 55.14 |      |
| C      |     |      |     |   |    |        |        |        |      |       |      |
| ANISOU | 911 | C    | GLU | A | 78 | 8479   | 6250   | 6223   | 986  | 777   | -683 |
| ATOM   | 912 | O    | GLU | A | 78 | 17.385 | 14.851 | 18.590 | 1.00 | 55.35 |      |
| O      |     |      |     |   |    |        |        |        |      |       |      |
| ANISOU | 912 | O    | GLU | A | 78 | 8628   | 6212   | 6190   | 942  | 475   | -732 |
| ATOM   | 913 | CB   | GLU | A | 78 | 14.660 | 13.850 | 19.310 | 1.00 | 54.02 |      |
| C      |     |      |     |   |    |        |        |        |      |       |      |
| ANISOU | 913 | CB   | GLU | A | 78 | 8599   | 6175   | 5752   | 934  | 1183  | -601 |
| ATOM   | 914 | CG   | GLU | A | 78 | 14.551 | 13.311 | 20.725 | 1.00 | 67.27 |      |
| C      |     |      |     |   |    |        |        |        |      |       |      |
| ANISOU | 914 | CG   | GLU | A | 78 | 10807  | 7696   | 7057   | 911  | 1284  | -651 |
| ATOM   | 915 | CD   | GLU | A | 78 | 13.349 | 12.428 | 20.990 | 1.00 | 88.38 |      |
| C      |     |      |     |   |    |        |        |        |      |       |      |
| ANISOU | 915 | CD   | GLU | A | 78 | 13519  | 10382  | 9679   | 865  | 1702  | -591 |
| ATOM   | 916 | OE1  | GLU | A | 78 | 13.186 | 11.406 | 20.284 | 1.00 | 82.00 |      |
| O      |     |      |     |   |    |        |        |        |      |       |      |
| ANISOU | 916 | OE1  | GLU | A | 78 | 12436  | 9710   | 9011   | 807  | 1701  | -501 |
| ATOM   | 917 | OE2  | GLU | A | 78 | 12.584 | 12.743 | 21.929 | 1.00 | 85.61 |      |
| O1-    |     |      |     |   |    |        |        |        |      |       |      |
| ANISOU | 917 | OE2  | GLU | A | 78 | 13488  | 9876   | 9162   | 881  | 2054  | -649 |
| ATOM   | 918 | H    | GLU | A | 78 | 13.346 | 15.803 | 18.293 | 1.00 | 0.00  |      |
| H      |     |      |     |   |    |        |        |        |      |       |      |
| ATOM   | 919 | HA   | GLU | A | 78 | 15.471 | 15.573 | 20.263 | 1.00 | 0.00  |      |
| H      |     |      |     |   |    |        |        |        |      |       |      |
| ATOM   | 920 | HB3  | GLU | A | 78 | 15.345 | 13.226 | 18.737 | 1.00 | 0.00  |      |
| H      |     |      |     |   |    |        |        |        |      |       |      |
| ATOM   | 921 | HB2  | GLU | A | 78 | 13.692 | 13.767 | 18.815 | 1.00 | 0.00  |      |
| H      |     |      |     |   |    |        |        |        |      |       |      |
| ATOM   | 922 | HG3  | GLU | A | 78 | 14.549 | 14.144 | 21.429 | 1.00 | 0.00  |      |
| H      |     |      |     |   |    |        |        |        |      |       |      |
| ATOM   | 923 | HG2  | GLU | A | 78 | 15.461 | 12.765 | 20.974 | 1.00 | 0.00  |      |
| H      |     |      |     |   |    |        |        |        |      |       |      |
| ATOM   | 924 | N    | TYR | A | 79 | 16.210 | 16.237 | 17.247 | 1.00 | 49.49 |      |
| N      |     |      |     |   |    |        |        |        |      |       |      |
| ANISOU | 924 | N    | TYR | A | 79 | 7443   | 5592   | 5770   | 1033 | 848   | -629 |
| ATOM   | 925 | CA   | TYR | A | 79 | 17.344 | 16.425 | 16.349 | 1.00 | 47.39 |      |
| C      |     |      |     |   |    |        |        |        |      |       |      |
| ANISOU | 925 | CA   | TYR | A | 79 | 6984   | 5295   | 5727   | 1013 | 647   | -624 |

|        |     |     |     |   |    |        |        |        |      |       |       |
|--------|-----|-----|-----|---|----|--------|--------|--------|------|-------|-------|
| ATOM   | 926 | C   | TYR | A | 79 | 17.997 | 17.768 | 16.618 | 1.00 | 52.11 |       |
| C      |     |     |     |   |    |        |        |        |      |       |       |
| ANISOU | 926 | C   | TYR | A | 79 | 7640   | 5704   | 6454   | 1040 | 610   | -746  |
| ATOM   | 927 | O   | TYR | A | 79 | 17.329 | 18.803 | 16.532 | 1.00 | 52.34 |       |
| O      |     |     |     |   |    |        |        |        |      |       |       |
| ANISOU | 927 | O   | TYR | A | 79 | 7659   | 5702   | 6524   | 1116 | 818   | -744  |
| ATOM   | 928 | CB  | TYR | A | 79 | 16.942 | 16.284 | 14.873 | 1.00 | 46.17 |       |
| C      |     |     |     |   |    |        |        |        |      |       |       |
| ANISOU | 928 | CB  | TYR | A | 79 | 6528   | 5272   | 5741   | 1051 | 745   | -480  |
| ATOM   | 929 | CG  | TYR | A | 79 | 16.568 | 14.883 | 14.446 | 1.00 | 45.49 |       |
| C      |     |     |     |   |    |        |        |        |      |       |       |
| ANISOU | 929 | CG  | TYR | A | 79 | 6345   | 5352   | 5589   | 1008 | 717   | -384  |
| ATOM   | 930 | CD1 | TYR | A | 79 | 17.522 | 13.867 | 14.399 | 1.00 | 46.11 |       |
| C      |     |     |     |   |    |        |        |        |      |       |       |
| ANISOU | 930 | CD1 | TYR | A | 79 | 6435   | 5434   | 5651   | 920  | 514   | -386  |
| ATOM   | 931 | CD2 | TYR | A | 79 | 15.273 | 14.581 | 14.036 | 1.00 | 45.65 |       |
| C      |     |     |     |   |    |        |        |        |      |       |       |
| ANISOU | 931 | CD2 | TYR | A | 79 | 6227   | 5503   | 5613   | 1061 | 876   | -309  |
| ATOM   | 932 | CE1 | TYR | A | 79 | 17.186 | 12.578 | 13.985 | 1.00 | 44.42 |       |
| C      |     |     |     |   |    |        |        |        |      |       |       |
| ANISOU | 932 | CE1 | TYR | A | 79 | 6137   | 5357   | 5383   | 878  | 498   | -302  |
| ATOM   | 933 | CE2 | TYR | A | 79 | 14.933 | 13.304 | 13.595 | 1.00 | 45.20 |       |
| C      |     |     |     |   |    |        |        |        |      |       |       |
| ANISOU | 933 | CE2 | TYR | A | 79 | 6060   | 5579   | 5535   | 1014 | 841   | -243  |
| ATOM   | 934 | CZ  | TYR | A | 79 | 15.888 | 12.300 | 13.590 | 1.00 | 49.12 |       |
| C      |     |     |     |   |    |        |        |        |      |       |       |
| ANISOU | 934 | CZ  | TYR | A | 79 | 6608   | 6083   | 5972   | 918  | 667   | -233  |
| ATOM   | 935 | OH  | TYR | A | 79 | 15.546 | 11.040 | 13.167 | 1.00 | 45.61 |       |
| O      |     |     |     |   |    |        |        |        |      |       |       |
| ANISOU | 935 | OH  | TYR | A | 79 | 6066   | 5756   | 5509   | 868  | 644   | -174  |
| ATOM   | 936 | H   | TYR | A | 79 | 15.328 | 16.691 | 17.055 | 1.00 | 0.00  |       |
| H      |     |     |     |   |    |        |        |        |      |       |       |
| ATOM   | 937 | HA  | TYR | A | 79 | 18.076 | 15.648 | 16.570 | 1.00 | 0.00  |       |
| H      |     |     |     |   |    |        |        |        |      |       |       |
| ATOM   | 938 | HB3 | TYR | A | 79 | 17.752 | 16.649 | 14.242 | 1.00 | 0.00  |       |
| H      |     |     |     |   |    |        |        |        |      |       |       |
| ATOM   | 939 | HB2 | TYR | A | 79 | 16.114 | 16.960 | 14.659 | 1.00 | 0.00  |       |
| H      |     |     |     |   |    |        |        |        |      |       |       |
| ATOM   | 940 | HD1 | TYR | A | 79 | 18.543 | 14.071 | 14.686 | 1.00 | 0.00  |       |
| H      |     |     |     |   |    |        |        |        |      |       |       |
| ATOM   | 941 | HD2 | TYR | A | 79 | 14.509 | 15.344 | 14.056 | 1.00 | 0.00  |       |
| H      |     |     |     |   |    |        |        |        |      |       |       |
| ATOM   | 942 | HE1 | TYR | A | 79 | 17.937 | 11.802 | 13.973 | 1.00 | 0.00  |       |
| H      |     |     |     |   |    |        |        |        |      |       |       |
| ATOM   | 943 | HE2 | TYR | A | 79 | 13.928 | 13.099 | 13.258 | 1.00 | 0.00  |       |
| H      |     |     |     |   |    |        |        |        |      |       |       |
| ATOM   | 944 | HH  | TYR | A | 79 | 16.185 | 10.406 | 13.500 | 1.00 | 0.00  |       |
| H      |     |     |     |   |    |        |        |        |      |       |       |
| ATOM   | 945 | N   | LYS | A | 80 | 19.283 | 17.752 | 16.997 | 1.00 | 49.03 |       |
| N      |     |     |     |   |    |        |        |        |      |       |       |
| ANISOU | 945 | N   | LYS | A | 80 | 7296   | 5167   | 6166   | 983  | 334   | -873  |
| ATOM   | 946 | CA  | LYS | A | 80 | 20.005 | 18.995 | 17.272 | 1.00 | 50.67 |       |
| C      |     |     |     |   |    |        |        |        |      |       |       |
| ANISOU | 946 | CA  | LYS | A | 80 | 7524   | 5162   | 6568   | 989  | 271   | -1027 |
| ATOM   | 947 | C   | LYS | A | 80 | 20.674 | 19.534 | 16.006 | 1.00 | 52.13 |       |
| C      |     |     |     |   |    |        |        |        |      |       |       |
| ANISOU | 947 | C   | LYS | A | 80 | 7404   | 5276   | 7128   | 971  | 359   | -985  |

|        |     |     |     |   |    |        |        |        |      |             |
|--------|-----|-----|-----|---|----|--------|--------|--------|------|-------------|
| ATOM   | 948 | O   | LYS | A | 80 | 21.014 | 20.716 | 15.949 | 1.00 | 53.19       |
| O      |     |     |     |   |    |        |        |        |      |             |
| ANISOU | 948 | O   | LYS | A | 80 | 7508   | 5229   | 7472   | 981  | 430 -1075   |
| ATOM   | 949 | CB  | LYS | A | 80 | 20.978 | 18.853 | 18.468 | 1.00 | 56.49       |
| C      |     |     |     |   |    |        |        |        |      |             |
| ANISOU | 949 | CB  | LYS | A | 80 | 8492   | 5717   | 7253   | 955  | -101 -1242  |
| ATOM   | 950 | CG  | LYS | A | 80 | 20.339 | 18.639 | 19.835 | 0.00 | 76.56       |
| C      |     |     |     |   |    |        |        |        |      |             |
| ANISOU | 950 | CG  | LYS | A | 80 | 10845  | 8176   | 10068  | 886  | -423 -1320  |
| ATOM   | 951 | CD  | LYS | A | 80 | 21.401 | 18.490 | 20.924 | 0.00 | 91.68       |
| C      |     |     |     |   |    |        |        |        |      |             |
| ANISOU | 951 | CD  | LYS | A | 80 | 13015  | 9889   | 11930  | 893  | -875 -1558  |
| ATOM   | 952 | CE  | LYS | A | 80 | 20.803 | 18.299 | 22.299 | 0.00 | 101.94      |
| C      |     |     |     |   |    |        |        |        |      |             |
| ANISOU | 952 | CE  | LYS | A | 80 | 14057  | 11061  | 13616  | 839  | -1223 -1677 |
| ATOM   | 953 | NZ  | LYS | A | 80 | 21.851 | 18.132 | 23.339 | 0.00 | 111.96      |
| N1+    |     |     |     |   |    |        |        |        |      |             |
| ANISOU | 953 | NZ  | LYS | A | 80 | 15601  | 12128  | 14810  | 883  | -1760 -1917 |
| ATOM   | 954 | H   | LYS | A | 80 | 19.769 | 16.872 | 17.097 | 1.00 | 0.00        |
| H      |     |     |     |   |    |        |        |        |      |             |
| ATOM   | 955 | HA  | LYS | A | 80 | 19.257 | 19.731 | 17.566 | 1.00 | 0.00        |
| H      |     |     |     |   |    |        |        |        |      |             |
| ATOM   | 956 | HB3 | LYS | A | 80 | 21.628 | 19.727 | 18.508 | 1.00 | 0.00        |
| H      |     |     |     |   |    |        |        |        |      |             |
| ATOM   | 957 | HB2 | LYS | A | 80 | 21.678 | 18.042 | 18.268 | 1.00 | 0.00        |
| H      |     |     |     |   |    |        |        |        |      |             |
| ATOM   | 958 | HG3 | LYS | A | 80 | 19.718 | 17.744 | 19.809 | 1.00 | 0.00        |
| H      |     |     |     |   |    |        |        |        |      |             |
| ATOM   | 959 | HG2 | LYS | A | 80 | 19.694 | 19.486 | 20.071 | 1.00 | 0.00        |
| H      |     |     |     |   |    |        |        |        |      |             |
| ATOM   | 960 | HD3 | LYS | A | 80 | 22.043 | 19.371 | 20.927 | 1.00 | 0.00        |
| H      |     |     |     |   |    |        |        |        |      |             |
| ATOM   | 961 | HD2 | LYS | A | 80 | 22.045 | 17.643 | 20.688 | 1.00 | 0.00        |
| H      |     |     |     |   |    |        |        |        |      |             |
| ATOM   | 962 | HE3 | LYS | A | 80 | 20.154 | 17.423 | 22.294 | 1.00 | 0.00        |
| H      |     |     |     |   |    |        |        |        |      |             |
| ATOM   | 963 | HE2 | LYS | A | 80 | 20.180 | 19.159 | 22.546 | 1.00 | 0.00        |
| H      |     |     |     |   |    |        |        |        |      |             |
| ATOM   | 964 | HZ1 | LYS | A | 80 | 22.163 | 17.171 | 23.352 | 1.00 | 0.00        |
| H      |     |     |     |   |    |        |        |        |      |             |
| ATOM   | 965 | HZ2 | LYS | A | 80 | 22.633 | 18.736 | 23.130 | 1.00 | 0.00        |
| H      |     |     |     |   |    |        |        |        |      |             |
| ATOM   | 966 | HZ3 | LYS | A | 80 | 21.471 | 18.375 | 24.243 | 1.00 | 0.00        |
| H      |     |     |     |   |    |        |        |        |      |             |
| ATOM   | 967 | N   | SER | A | 81 | 20.835 | 18.669 | 14.984 | 1.00 | 45.38       |
| N      |     |     |     |   |    |        |        |        |      |             |
| ANISOU | 967 | N   | SER | A | 81 | 6360   | 4536   | 6345   | 944  | 391 -848    |
| ATOM   | 968 | CA  | SER | A | 81 | 21.450 | 19.037 | 13.714 | 1.00 | 44.00       |
| C      |     |     |     |   |    |        |        |        |      |             |
| ANISOU | 968 | CA  | SER | A | 81 | 5977   | 4270   | 6472   | 930  | 538 -787    |
| ATOM   | 969 | C   | SER | A | 81 | 20.892 | 18.233 | 12.540 | 1.00 | 46.05       |
| C      |     |     |     |   |    |        |        |        |      |             |
| ANISOU | 969 | C   | SER | A | 81 | 6150   | 4712   | 6633   | 962  | 664 -583    |
| ATOM   | 970 | O   | SER | A | 81 | 20.292 | 17.170 | 12.745 | 1.00 | 43.12       |
| O      |     |     |     |   |    |        |        |        |      |             |
| ANISOU | 970 | O   | SER | A | 81 | 5810   | 4535   | 6041   | 959  | 578 -521    |

|        |     |      |       |    |        |        |        |      |       |      |
|--------|-----|------|-------|----|--------|--------|--------|------|-------|------|
| ATOM C | 971 | CB   | SER A | 81 | 22.963 | 18.844 | 13.789 | 1.00 | 47.39 |      |
| ANISOU | 971 | CB   | SER A | 81 | 6264   | 4494   | 7248   | 824  | 348   | -948 |
| ATOM O | 972 | OG   | SER A | 81 | 23.314 | 17.471 | 13.814 | 1.00 | 49.74 |      |
| ANISOU | 972 | OG   | SER A | 81 | 6515   | 4890   | 7493   | 772  | 136   | -937 |
| ATOM H | 973 | H    | SER A | 81 | 20.523 | 17.713 | 15.077 | 1.00 | 0.00  |      |
| ATOM H | 974 | HA   | SER A | 81 | 21.249 | 20.093 | 13.531 | 1.00 | 0.00  |      |
| ATOM H | 975 | HB3  | SER A | 81 | 23.347 | 19.333 | 14.684 | 1.00 | 0.00  |      |
| ATOM H | 976 | HB2  | SER A | 81 | 23.433 | 19.323 | 12.930 | 1.00 | 0.00  |      |
| ATOM H | 977 | HG   | SER A | 81 | 24.056 | 17.341 | 14.409 | 1.00 | 0.00  |      |
| ATOM N | 978 | N    | VAL A | 82 | 21.138 | 18.727 | 11.304 | 1.00 | 43.68 |      |
| ANISOU | 978 | N    | VAL A | 82 | 5780   | 4318   | 6499   | 993  | 875   | -491 |
| ATOM C | 979 | CA   | VAL A | 82 | 20.766 | 18.047 | 10.056 | 1.00 | 42.82 |      |
| ANISOU | 979 | CA   | VAL A | 82 | 5649   | 4327   | 6293   | 1040 | 973   | -316 |
| ATOM C | 980 | C    | VAL A | 82 | 21.622 | 16.771 | 9.928  | 1.00 | 45.70 |      |
| ANISOU | 980 | C    | VAL A | 82 | 5906   | 4716   | 6743   | 925  | 835   | -345 |
| ATOM O | 981 | O    | VAL A | 82 | 21.112 | 15.752 | 9.464  | 1.00 | 44.52 |      |
| ANISOU | 981 | O    | VAL A | 82 | 5751   | 4746   | 6417   | 938  | 791   | -242 |
| ATOM C | 982 | CB   | VAL A | 82 | 20.872 | 18.978 | 8.816  | 1.00 | 48.13 |      |
| ANISOU | 982 | CB   | VAL A | 82 | 6393   | 4828   | 7066   | 1124 | 1249  | -212 |
| ATOM C | 983 | CG1  | VAL A | 82 | 20.615 | 18.219 | 7.513  | 1.00 | 47.46 |      |
| ANISOU | 983 | CG1  | VAL A | 82 | 6369   | 4829   | 6836   | 1186 | 1311  | -49  |
| ATOM C | 984 | CG2  | VAL A | 82 | 19.914 | 20.158 | 8.937  | 1.00 | 48.98 |      |
| ANISOU | 984 | CG2  | VAL A | 82 | 6613   | 4911   | 7084   | 1263 | 1351  | -176 |
| ATOM H | 985 | H    | VAL A | 82 | 21.605 | 19.616 | 11.199 | 1.00 | 0.00  |      |
| ATOM H | 986 | HA   | VAL A | 82 | 19.725 | 17.737 | 10.147 | 1.00 | 0.00  |      |
| ATOM H | 987 | HB   | VAL A | 82 | 21.887 | 19.373 | 8.779  | 1.00 | 0.00  |      |
| ATOM H | 988 | HG11 | VAL A | 82 | 20.698 | 18.905 | 6.670  | 1.00 | 0.00  |      |
| ATOM H | 989 | HG12 | VAL A | 82 | 21.350 | 17.421 | 7.406  | 1.00 | 0.00  |      |
| ATOM H | 990 | HG13 | VAL A | 82 | 19.613 | 17.789 | 7.534  | 1.00 | 0.00  |      |
| ATOM H | 991 | HG21 | VAL A | 82 | 20.007 | 20.794 | 8.057  | 1.00 | 0.00  |      |
| ATOM H | 992 | HG22 | VAL A | 82 | 18.891 | 19.790 | 9.011  | 1.00 | 0.00  |      |
| ATOM H | 993 | HG23 | VAL A | 82 | 20.158 | 20.735 | 9.829  | 1.00 | 0.00  |      |
| ATOM N | 994 | N    | THR A | 83 | 22.901 | 16.822 | 10.389 | 1.00 | 43.04 |      |

|        |      |      |     |   |    |        |        |        |      |       |      |
|--------|------|------|-----|---|----|--------|--------|--------|------|-------|------|
| ANISOU | 994  | N    | THR | A | 83 | 5463   | 4184   | 6708   | 817  | 741   | -508 |
| ATOM   | 995  | CA   | THR | A | 83 | 23.851 | 15.703 | 10.412 | 1.00 | 43.08 |      |
| C      |      |      |     |   |    |        |        |        |      |       |      |
| ANISOU | 995  | CA   | THR | A | 83 | 5330   | 4159   | 6879   | 718  | 575   | -577 |
| ATOM   | 996  | C    | THR | A | 83 | 23.245 | 14.493 | 11.145 | 1.00 | 45.35 |      |
| C      |      |      |     |   |    |        |        |        |      |       |      |
| ANISOU | 996  | C    | THR | A | 83 | 5690   | 4681   | 6859   | 717  | 320   | -549 |
| ATOM   | 997  | O    | THR | A | 83 | 23.273 | 13.389 | 10.598 | 1.00 | 43.14 |      |
| O      |      |      |     |   |    |        |        |        |      |       |      |
| ANISOU | 997  | O    | THR | A | 83 | 5358   | 4501   | 6534   | 689  | 296   | -474 |
| ATOM   | 998  | CB   | THR | A | 83 | 25.210 | 16.165 | 10.978 | 1.00 | 52.24 |      |
| C      |      |      |     |   |    |        |        |        |      |       |      |
| ANISOU | 998  | CB   | THR | A | 83 | 6333   | 5034   | 8481   | 630  | 453   | -808 |
| ATOM   | 999  | OG1  | THR | A | 83 | 25.764 | 17.114 | 10.070 | 1.00 | 55.51 |      |
| O      |      |      |     |   |    |        |        |        |      |       |      |
| ANISOU | 999  | OG1  | THR | A | 83 | 6676   | 5205   | 9212   | 614  | 789   | -814 |
| ATOM   | 1000 | CG2  | THR | A | 83 | 26.205 | 15.014 | 11.179 | 1.00 | 51.13 |      |
| C      |      |      |     |   |    |        |        |        |      |       |      |
| ANISOU | 1000 | CG2  | THR | A | 83 | 6014   | 4829   | 8583   | 547  | 230   | -911 |
| ATOM   | 1001 | H    | THR | A | 83 | 23.271 | 17.687 | 10.757 | 1.00 | 0.00  |      |
| H      |      |      |     |   |    |        |        |        |      |       |      |
| ATOM   | 1002 | HA   | THR | A | 83 | 24.019 | 15.402 | 9.378  | 1.00 | 0.00  |      |
| H      |      |      |     |   |    |        |        |        |      |       |      |
| ATOM   | 1003 | HB   | THR | A | 83 | 25.042 | 16.655 | 11.937 | 1.00 | 0.00  |      |
| H      |      |      |     |   |    |        |        |        |      |       |      |
| ATOM   | 1004 | HG1  | THR | A | 83 | 25.337 | 17.964 | 10.195 | 1.00 | 0.00  |      |
| H      |      |      |     |   |    |        |        |        |      |       |      |
| ATOM   | 1005 | HG21 | THR | A | 83 | 27.140 | 15.407 | 11.579 | 1.00 | 0.00  |      |
| H      |      |      |     |   |    |        |        |        |      |       |      |
| ATOM   | 1006 | HG22 | THR | A | 83 | 25.787 | 14.290 | 11.878 | 1.00 | 0.00  |      |
| H      |      |      |     |   |    |        |        |        |      |       |      |
| ATOM   | 1007 | HG23 | THR | A | 83 | 26.396 | 14.527 | 10.223 | 1.00 | 0.00  |      |
| H      |      |      |     |   |    |        |        |        |      |       |      |
| ATOM   | 1008 | N    | GLU | A | 84 | 22.663 | 14.719 | 12.352 | 1.00 | 41.69 |      |
| N      |      |      |     |   |    |        |        |        |      |       |      |
| ANISOU | 1008 | N    | GLU | A | 84 | 5382   | 4283   | 6176   | 748  | 179   | -606 |
| ATOM   | 1009 | CA   | GLU | A | 84 | 21.987 | 13.692 | 13.161 | 1.00 | 40.47 |      |
| C      |      |      |     |   |    |        |        |        |      |       |      |
| ANISOU | 1009 | CA   | GLU | A | 84 | 5372   | 4301   | 5705   | 749  | 20    | -577 |
| ATOM   | 1010 | C    | GLU | A | 84 | 20.813 | 13.075 | 12.393 | 1.00 | 42.17 |      |
| C      |      |      |     |   |    |        |        |        |      |       |      |
| ANISOU | 1010 | C    | GLU | A | 84 | 5567   | 4740   | 5716   | 785  | 192   | -399 |
| ATOM   | 1011 | O    | GLU | A | 84 | 20.641 | 11.854 | 12.415 | 1.00 | 40.94 |      |
| O      |      |      |     |   |    |        |        |        |      |       |      |
| ANISOU | 1011 | O    | GLU | A | 84 | 5414   | 4696   | 5445   | 747  | 107   | -351 |
| ATOM   | 1012 | CB   | GLU | A | 84 | 21.484 | 14.277 | 14.488 | 1.00 | 42.95 |      |
| C      |      |      |     |   |    |        |        |        |      |       |      |
| ANISOU | 1012 | CB   | GLU | A | 84 | 5923   | 4587   | 5809   | 788  | -47   | -667 |
| ATOM   | 1013 | CG   | GLU | A | 84 | 22.562 | 14.382 | 15.553 | 1.00 | 54.05 |      |
| C      |      |      |     |   |    |        |        |        |      |       |      |
| ANISOU | 1013 | CG   | GLU | A | 84 | 7434   | 5788   | 7315   | 762  | -368  | -872 |
| ATOM   | 1014 | CD   | GLU | A | 84 | 22.136 | 14.879 | 16.924 | 1.00 | 68.11 |      |
| C      |      |      |     |   |    |        |        |        |      |       |      |
| ANISOU | 1014 | CD   | GLU | A | 84 | 9562   | 7516   | 8802   | 810  | -465  | -969 |
| ATOM   | 1015 | OE1  | GLU | A | 84 | 20.927 | 15.121 | 17.142 | 1.00 | 51.20 |      |
| O      |      |      |     |   |    |        |        |        |      |       |      |
| ANISOU | 1015 | OE1  | GLU | A | 84 | 7555   | 5488   | 6410   | 853  | -210  | -880 |

|        |      |     |     |   |    |        |        |        |      |       |       |
|--------|------|-----|-----|---|----|--------|--------|--------|------|-------|-------|
| ATOM   | 1016 | OE2 | GLU | A | 84 | 23.027 | 15.014 | 17.791 | 1.00 | 69.55 |       |
| ANISOU | 1016 | OE2 | GLU | A | 84 | 9892   | 7516   | 9019   | 813  | -803  | -1152 |
| ATOM   | 1017 | H   | GLU | A | 84 | 22.676 | 15.646 | 12.753 | 1.00 | 0.00  |       |
| H      |      |     |     |   |    |        |        |        |      |       |       |
| ATOM   | 1018 | HA  | GLU | A | 84 | 22.705 | 12.903 | 13.384 | 1.00 | 0.00  |       |
| H      |      |     |     |   |    |        |        |        |      |       |       |
| ATOM   | 1019 | HB3 | GLU | A | 84 | 20.662 | 13.667 | 14.864 | 1.00 | 0.00  |       |
| H      |      |     |     |   |    |        |        |        |      |       |       |
| ATOM   | 1020 | HB2 | GLU | A | 84 | 21.055 | 15.263 | 14.309 | 1.00 | 0.00  |       |
| H      |      |     |     |   |    |        |        |        |      |       |       |
| ATOM   | 1021 | HG3 | GLU | A | 84 | 23.373 | 15.008 | 15.181 | 1.00 | 0.00  |       |
| H      |      |     |     |   |    |        |        |        |      |       |       |
| ATOM   | 1022 | HG2 | GLU | A | 84 | 23.056 | 13.416 | 15.660 | 1.00 | 0.00  |       |
| H      |      |     |     |   |    |        |        |        |      |       |       |
| ATOM   | 1023 | N   | PHE | A | 85 | 20.014 | 13.926 | 11.715 | 1.00 | 37.68 |       |
| N      |      |     |     |   |    |        |        |        |      |       |       |
| ANISOU | 1023 | N   | PHE | A | 85 | 4977   | 4212   | 5127   | 869  | 406   | -316  |
| ATOM   | 1024 | CA  | PHE | A | 85 | 18.885 | 13.516 | 10.881 | 1.00 | 35.72 |       |
| C      |      |     |     |   |    |        |        |        |      |       |       |
| ANISOU | 1024 | CA  | PHE | A | 85 | 4684   | 4139   | 4748   | 934  | 513   | -181  |
| ATOM   | 1025 | C   | PHE | A | 85 | 19.388 | 12.644 | 9.716  | 1.00 | 37.10 |       |
| C      |      |     |     |   |    |        |        |        |      |       |       |
| ANISOU | 1025 | C   | PHE | A | 85 | 4775   | 4339   | 4983   | 904  | 500   | -106  |
| ATOM   | 1026 | O   | PHE | A | 85 | 18.851 | 11.565 | 9.496  | 1.00 | 35.60 |       |
| O      |      |     |     |   |    |        |        |        |      |       |       |
| ANISOU | 1026 | O   | PHE | A | 85 | 4551   | 4297   | 4678   | 888  | 445   | -53   |
| ATOM   | 1027 | CB  | PHE | A | 85 | 18.116 | 14.750 | 10.381 | 1.00 | 37.50 |       |
| C      |      |     |     |   |    |        |        |        |      |       |       |
| ANISOU | 1027 | CB  | PHE | A | 85 | 4924   | 4341   | 4985   | 1064 | 677   | -133  |
| ATOM   | 1028 | CG  | PHE | A | 85 | 16.948 | 14.449 | 9.473  | 1.00 | 38.29 |       |
| C      |      |     |     |   |    |        |        |        |      |       |       |
| ANISOU | 1028 | CG  | PHE | A | 85 | 4967   | 4582   | 4999   | 1170 | 709   | -27   |
| ATOM   | 1029 | CD1 | PHE | A | 85 | 15.721 | 14.062 | 9.998  | 1.00 | 40.93 |       |
| C      |      |     |     |   |    |        |        |        |      |       |       |
| ANISOU | 1029 | CD1 | PHE | A | 85 | 5242   | 5050   | 5259   | 1196 | 711   | -41   |
| ATOM   | 1030 | CD2 | PHE | A | 85 | 17.078 | 14.547 | 8.091  | 1.00 | 40.25 |       |
| C      |      |     |     |   |    |        |        |        |      |       |       |
| ANISOU | 1030 | CD2 | PHE | A | 85 | 5239   | 4794   | 5260   | 1250 | 739   | 68    |
| ATOM   | 1031 | CE1 | PHE | A | 85 | 14.642 | 13.782 | 9.158  | 1.00 | 42.92 |       |
| C      |      |     |     |   |    |        |        |        |      |       |       |
| ANISOU | 1031 | CE1 | PHE | A | 85 | 5387   | 5407   | 5516   | 1301 | 684   | 14    |
| ATOM   | 1032 | CE2 | PHE | A | 85 | 16.000 | 14.255 | 7.248  | 1.00 | 43.62 |       |
| C      |      |     |     |   |    |        |        |        |      |       |       |
| ANISOU | 1032 | CE2 | PHE | A | 85 | 5641   | 5329   | 5603   | 1374 | 680   | 138   |
| ATOM   | 1033 | CZ  | PHE | A | 85 | 14.791 | 13.867 | 7.787  | 1.00 | 42.34 |       |
| C      |      |     |     |   |    |        |        |        |      |       |       |
| ANISOU | 1033 | CZ  | PHE | A | 85 | 5347   | 5308   | 5432   | 1399 | 624   | 98    |
| ATOM   | 1034 | H   | PHE | A | 85 | 20.179 | 14.921 | 11.765 | 1.00 | 0.00  |       |
| H      |      |     |     |   |    |        |        |        |      |       |       |
| ATOM   | 1035 | HA  | PHE | A | 85 | 18.210 | 12.916 | 11.491 | 1.00 | 0.00  |       |
| H      |      |     |     |   |    |        |        |        |      |       |       |

|          |      |     |     |   |    |        |        |        |      |       |      |
|----------|------|-----|-----|---|----|--------|--------|--------|------|-------|------|
| ATOM H   | 1038 | HD1 | PHE | A | 85 | 15.594 | 13.975 | 11.067 | 1.00 | 0.00  |      |
| ATOM H   | 1039 | HD2 | PHE | A | 85 | 18.019 | 14.851 | 7.657  | 1.00 | 0.00  |      |
| ATOM H   | 1040 | HE1 | PHE | A | 85 | 13.689 | 13.498 | 9.579  | 1.00 | 0.00  |      |
| ATOM H   | 1041 | HE2 | PHE | A | 85 | 16.115 | 14.334 | 6.177  | 1.00 | 0.00  |      |
| ATOM H   | 1042 | HZ  | PHE | A | 85 | 13.961 | 13.630 | 7.138  | 1.00 | 0.00  |      |
| ATOM N   | 1043 | N   | LYS | A | 86 | 20.436 | 13.100 | 9.000  | 1.00 | 34.79 |      |
| ANISOU   | 1043 | N   | LYS | A | 86 | 4457   | 3872   | 4891   | 887  | 582   | -116 |
| ATOM C   | 1044 | CA  | LYS | A | 86 | 21.064 | 12.361 | 7.889  | 1.00 | 34.66 |      |
| ANISOU   | 1044 | CA  | LYS | A | 86 | 4401   | 3815   | 4954   | 855  | 640   | -60  |
| ATOM C   | 1045 | C   | LYS | A | 86 | 21.569 | 10.991 | 8.344  | 1.00 | 37.91 |      |
| ANISOU   | 1045 | C   | LYS | A | 86 | 4730   | 4288   | 5387   | 749  | 459   | -106 |
| ATOM O   | 1046 | O   | LYS | A | 86 | 21.419 | 10.014 | 7.606  | 1.00 | 35.64 |      |
| ANISOU   | 1046 | O   | LYS | A | 86 | 4430   | 4084   | 5026   | 739  | 463   | -36  |
| ATOM C   | 1047 | CB  | LYS | A | 86 | 22.227 | 13.166 | 7.289  | 1.00 | 37.71 |      |
| ANISOU   | 1047 | CB  | LYS | A | 86 | 4773   | 3930   | 5625   | 829  | 834   | -100 |
| ATOM C   | 1048 | CG  | LYS | A | 86 | 21.784 | 14.355 | 6.442  | 1.00 | 39.53 |      |
| ANISOU   | 1048 | CG  | LYS | A | 86 | 5158   | 4058   | 5802   | 950  | 1074  | -6   |
| ATOM C   | 1049 | CD  | LYS | A | 86 | 22.956 | 15.293 | 6.106  | 1.00 | 44.88 |      |
| ANISOU   | 1049 | CD  | LYS | A | 86 | 5828   | 4414   | 6812   | 902  | 1327  | -71  |
| ATOM C   | 1050 | CE  | LYS | A | 86 | 23.987 | 14.693 | 5.173  | 1.00 | 53.74 |      |
| ANISOU   | 1050 | CE  | LYS | A | 86 | 6923   | 5360   | 8136   | 825  | 1524  | -68  |
| ATOM N1+ | 1051 | NZ  | LYS | A | 86 | 25.022 | 15.696 | 4.798  | 1.00 | 63.83 |      |
| ANISOU   | 1051 | NZ  | LYS | A | 86 | 8189   | 6277   | 9788   | 774  | 1860  | -136 |
| ATOM H   | 1052 | H   | LYS | A | 86 | 20.839 | 14.001 | 9.213  | 1.00 | 0.00  |      |
| ATOM H   | 1053 | HA  | LYS | A | 86 | 20.315 | 12.209 | 7.112  | 1.00 | 0.00  |      |
| ATOM H   | 1054 | HB3 | LYS | A | 86 | 22.851 | 12.506 | 6.687  | 1.00 | 0.00  |      |
| ATOM H   | 1055 | HB2 | LYS | A | 86 | 22.876 | 13.516 | 8.092  | 1.00 | 0.00  |      |
| ATOM H   | 1056 | HG3 | LYS | A | 86 | 21.014 | 14.913 | 6.975  | 1.00 | 0.00  |      |
| ATOM H   | 1057 | HG2 | LYS | A | 86 | 21.332 | 13.994 | 5.518  | 1.00 | 0.00  |      |
| ATOM H   | 1058 | HD3 | LYS | A | 86 | 23.443 | 15.607 | 7.029  | 1.00 | 0.00  |      |
| ATOM H   | 1059 | HD2 | LYS | A | 86 | 22.568 | 16.214 | 5.671  | 1.00 | 0.00  |      |
| ATOM H   | 1060 | HE3 | LYS | A | 86 | 23.493 | 14.328 | 4.273  | 1.00 | 0.00  |      |
| ATOM H   | 1061 | HE2 | LYS | A | 86 | 24.465 | 13.843 | 5.659  | 1.00 | 0.00  |      |

|        |      |     |     |   |    |        |        |        |      |       |      |
|--------|------|-----|-----|---|----|--------|--------|--------|------|-------|------|
| ATOM   | 1062 | HZ1 | LYS | A | 86 | 24.651 | 16.316 | 4.093  | 1.00 | 0.00  |      |
| H      |      |     |     |   |    |        |        |        |      |       |      |
| ATOM   | 1063 | HZ2 | LYS | A | 86 | 25.283 | 16.232 | 5.613  | 1.00 | 0.00  |      |
| H      |      |     |     |   |    |        |        |        |      |       |      |
| ATOM   | 1064 | HZ3 | LYS | A | 86 | 25.835 | 15.221 | 4.433  | 1.00 | 0.00  |      |
| H      |      |     |     |   |    |        |        |        |      |       |      |
| ATOM   | 1065 | N   | ALA | A | 87 | 22.150 | 10.916 | 9.566  | 1.00 | 36.22 |      |
| N      |      |     |     |   |    |        |        |        |      |       |      |
| ANISOU | 1065 | N   | ALA | A | 87 | 4494   | 4012   | 5256   | 687  | 275   | -230 |
| ATOM   | 1066 | CA  | ALA | A | 87 | 22.655 | 9.664  | 10.140 | 1.00 | 36.18 |      |
| C      |      |     |     |   |    |        |        |        |      |       |      |
| ANISOU | 1066 | CA  | ALA | A | 87 | 4460   | 4026   | 5260   | 614  | 53    | -281 |
| ATOM   | 1067 | C   | ALA | A | 87 | 21.526 | 8.637  | 10.356 | 1.00 | 37.72 |      |
| C      |      |     |     |   |    |        |        |        |      |       |      |
| ANISOU | 1067 | C   | ALA | A | 87 | 4738   | 4441   | 5152   | 618  | 13    | -189 |
| ATOM   | 1068 | O   | ALA | A | 87 | 21.720 | 7.456  | 10.058 | 1.00 | 34.81 |      |
| O      |      |     |     |   |    |        |        |        |      |       |      |
| ANISOU | 1068 | O   | ALA | A | 87 | 4330   | 4121   | 4777   | 572  | -52   | -158 |
| ATOM   | 1069 | CB  | ALA | A | 87 | 23.378 | 9.936  | 11.451 | 1.00 | 38.69 |      |
| C      |      |     |     |   |    |        |        |        |      |       |      |
| ANISOU | 1069 | CB  | ALA | A | 87 | 4821   | 4203   | 5674   | 592  | -189  | -440 |
| ATOM   | 1070 | H   | ALA | A | 87 | 22.252 | 11.749 | 10.129 | 1.00 | 0.00  |      |
| H      |      |     |     |   |    |        |        |        |      |       |      |
| ATOM   | 1071 | HA  | ALA | A | 87 | 23.373 | 9.236  | 9.440  | 1.00 | 0.00  |      |
| H      |      |     |     |   |    |        |        |        |      |       |      |
| ATOM   | 1072 | HB1 | ALA | A | 87 | 23.747 | 8.997  | 11.865 | 1.00 | 0.00  |      |
| H      |      |     |     |   |    |        |        |        |      |       |      |
| ATOM   | 1073 | HB2 | ALA | A | 87 | 24.217 | 10.608 | 11.271 | 1.00 | 0.00  |      |
| H      |      |     |     |   |    |        |        |        |      |       |      |
| ATOM   | 1074 | HB3 | ALA | A | 87 | 22.689 | 10.398 | 12.158 | 1.00 | 0.00  |      |
| H      |      |     |     |   |    |        |        |        |      |       |      |
| ATOM   | 1075 | N   | ASP | A | 88 | 20.348 | 9.082  | 10.859 | 1.00 | 34.36 |      |
| N      |      |     |     |   |    |        |        |        |      |       |      |
| ANISOU | 1075 | N   | ASP | A | 88 | 4409   | 4122   | 4523   | 669  | 83    | -159 |
| ATOM   | 1076 | CA  | ASP | A | 88 | 19.201 | 8.179  | 11.063 | 1.00 | 33.62 |      |
| C      |      |     |     |   |    |        |        |        |      |       |      |
| ANISOU | 1076 | CA  | ASP | A | 88 | 4352   | 4196   | 4227   | 661  | 111   | -96  |
| ATOM   | 1077 | C   | ASP | A | 88 | 18.671 | 7.689  | 9.714  | 1.00 | 36.02 |      |
| C      |      |     |     |   |    |        |        |        |      |       |      |
| ANISOU | 1077 | C   | ASP | A | 88 | 4531   | 4611   | 4543   | 685  | 187   | -8   |
| ATOM   | 1078 | O   | ASP | A | 88 | 18.346 | 6.510  | 9.561  | 1.00 | 33.81 |      |
| O      |      |     |     |   |    |        |        |        |      |       |      |
| ANISOU | 1078 | O   | ASP | A | 88 | 4220   | 4422   | 4206   | 636  | 148   | 22   |
| ATOM   | 1079 | CB  | ASP | A | 88 | 18.085 | 8.875  | 11.860 | 1.00 | 36.47 |      |
| C      |      |     |     |   |    |        |        |        |      |       |      |
| ANISOU | 1079 | CB  | ASP | A | 88 | 4805   | 4594   | 4457   | 709  | 229   | -112 |
| ATOM   | 1080 | CG  | ASP | A | 88 | 18.196 | 8.771  | 13.368 | 1.00 | 43.87 |      |
| C      |      |     |     |   |    |        |        |        |      |       |      |
| ANISOU | 1080 | CG  | ASP | A | 88 | 5980   | 5450   | 5240   | 678  | 165   | -185 |
| ATOM   | 1081 | OD1 | ASP | A | 88 | 19.186 | 8.186  | 13.856 | 1.00 | 44.01 |      |
| O      |      |     |     |   |    |        |        |        |      |       |      |
| ANISOU | 1081 | OD1 | ASP | A | 88 | 6096   | 5374   | 5251   | 636  | -42   | -232 |
| ATOM   | 1082 | OD2 | ASP | A | 88 | 17.278 | 9.250  | 14.060 | 1.00 | 47.07 |      |
| O1-</  |      |     |     |   |    |        |        |        |      |       |      |

|        |      |     |     |   |    |        |        |        |      |       |     |
|--------|------|-----|-----|---|----|--------|--------|--------|------|-------|-----|
| ATOM H | 1084 | HA  | ASP | A | 88 | 19.542 | 7.314  | 11.633 | 1.00 | 0.00  |     |
| ATOM H | 1085 | HB3 | ASP | A | 88 | 17.118 | 8.484  | 11.542 | 1.00 | 0.00  |     |
| ATOM H | 1086 | HB2 | ASP | A | 88 | 18.040 | 9.926  | 11.574 | 1.00 | 0.00  |     |
| ATOM N | 1087 | N   | PHE | A | 89 | 18.617 | 8.597  | 8.729  | 1.00 | 33.11 |     |
| ANISOU | 1087 | N   | PHE | A | 89 | 4132   | 4209   | 4239   | 769  | 282   | 28  |
| ATOM C | 1088 | CA  | PHE | A | 89 | 18.176 | 8.294  | 7.372  | 1.00 | 32.54 |     |
| ANISOU | 1088 | CA  | PHE | A | 89 | 4032   | 4196   | 4133   | 831  | 314   | 103 |
| ATOM C | 1089 | C   | PHE | A | 89 | 19.084 | 7.232  | 6.729  | 1.00 | 33.12 |     |
| ANISOU | 1089 | C   | PHE | A | 89 | 4094   | 4235   | 4255   | 755  | 282   | 116 |
| ATOM O | 1090 | O   | PHE | A | 89 | 18.582 | 6.247  | 6.172  | 1.00 | 31.92 |     |
| ANISOU | 1090 | O   | PHE | A | 89 | 3918   | 4186   | 4024   | 747  | 229   | 145 |
| ATOM C | 1091 | CB  | PHE | A | 89 | 18.158 | 9.579  | 6.531  | 1.00 | 35.25 |     |
| ANISOU | 1091 | CB  | PHE | A | 89 | 4454   | 4440   | 4499   | 956  | 427   | 144 |
| ATOM C | 1092 | CG  | PHE | A | 89 | 17.878 | 9.328  | 5.075  | 1.00 | 37.34 |     |
| ANISOU | 1092 | CG  | PHE | A | 89 | 4806   | 4704   | 4677   | 1047 | 437   | 220 |
| ATOM C | 1093 | CD1 | PHE | A | 89 | 16.631 | 8.874  | 4.660  | 1.00 | 41.45 |     |
| ANISOU | 1093 | CD1 | PHE | A | 89 | 5294   | 5364   | 5092   | 1130 | 308   | 234 |
| ATOM C | 1094 | CD2 | PHE | A | 89 | 18.863 | 9.528  | 4.118  | 1.00 | 39.27 |     |
| ANISOU | 1094 | CD2 | PHE | A | 89 | 5186   | 4775   | 4960   | 1052 | 581   | 258 |
| ATOM C | 1095 | CE1 | PHE | A | 89 | 16.375 | 8.642  | 3.314  | 1.00 | 43.04 |     |
| ANISOU | 1095 | CE1 | PHE | A | 89 | 5638   | 5542   | 5174   | 1238 | 252   | 285 |
| ATOM C | 1096 | CE2 | PHE | A | 89 | 18.608 | 9.284  | 2.774  | 1.00 | 43.11 |     |
| ANISOU | 1096 | CE2 | PHE | A | 89 | 5856   | 5227   | 5296   | 1152 | 601   | 329 |
| ATOM C | 1097 | CZ  | PHE | A | 89 | 17.371 | 8.837  | 2.381  | 1.00 | 41.72 |     |
| ANISOU | 1097 | CZ  | PHE | A | 89 | 5688   | 5201   | 4962   | 1254 | 402   | 342 |
| ATOM H | 1098 | H   | PHE | A | 89 | 18.891 | 9.553  | 8.907  | 1.00 | 0.00  |     |
| ATOM H | 1099 | HA  | PHE | A | 89 | 17.162 | 7.898  | 7.419  | 1.00 | 0.00  |     |
| ATOM H | 1100 | HB3 | PHE | A | 89 | 19.115 | 10.092 | 6.633  | 1.00 | 0.00  |     |
| ATOM H | 1101 | HB2 | PHE | A | 89 | 17.409 | 10.263 | 6.931  | 1.00 | 0.00  |     |
| ATOM H | 1102 | HD1 | PHE | A | 89 | 15.851 | 8.699  | 5.386  | 1.00 | 0.00  |     |
| ATOM H | 1103 | HD2 | PHE | A | 89 | 19.841 | 9.877  | 4.415  | 1.00 | 0.00  |     |
| ATOM H | 1104 | HE1 | PHE | A | 89 | 15.397 | 8.309  | 3.000  | 1.00 | 0.00  |     |
| ATOM H | 1105 | HE2 | PHE | A | 89 | 19.383 | 9.446  | 2.039  | 1.00 | 0.00  |     |
| ATOM H | 1106 | HZ  | PHE | A | 89 | 17.179 | 8.638  | 1.337  | 1.00 | 0.00  |     |

|        |      |     |     |   |    |        |       |       |      |       |      |
|--------|------|-----|-----|---|----|--------|-------|-------|------|-------|------|
| ATOM   | 1107 | N   | LYS | A | 90 | 20.417 | 7.438 | 6.813 | 1.00 | 29.30 |      |
| N      |      |     |     |   |    |        |       |       |      |       |      |
| ANISOU | 1107 | N   | LYS | A | 90 | 3603   | 3586  | 3945  | 699  | 316   | 73   |
| ATOM   | 1108 | CA  | LYS | A | 90 | 21.418 | 6.513 | 6.284 | 1.00 | 29.39 |      |
| C      |      |     |     |   |    |        |       |       |      |       |      |
| ANISOU | 1108 | CA  | LYS | A | 90 | 3570   | 3514  | 4082  | 625  | 320   | 61   |
| ATOM   | 1109 | C   | LYS | A | 90 | 21.298 | 5.153 | 6.978 | 1.00 | 33.49 |      |
| C      |      |     |     |   |    |        |       |       |      |       |      |
| ANISOU | 1109 | C   | LYS | A | 90 | 4044   | 4139  | 4541  | 546  | 145   | 43   |
| ATOM   | 1110 | O   | LYS | A | 90 | 21.371 | 4.128 | 6.305 | 1.00 | 31.89 |      |
| O      |      |     |     |   |    |        |       |       |      |       |      |
| ANISOU | 1110 | O   | LYS | A | 90 | 3826   | 3969  | 4321  | 515  | 145   | 72   |
| ATOM   | 1111 | CB  | LYS | A | 90 | 22.836 | 7.075 | 6.449 | 1.00 | 32.15 |      |
| C      |      |     |     |   |    |        |       |       |      |       |      |
| ANISOU | 1111 | CB  | LYS | A | 90 | 3847   | 3627  | 4740  | 577  | 383   | -27  |
| ATOM   | 1112 | CG  | LYS | A | 90 | 23.912 | 6.179 | 5.807 | 1.00 | 34.44 |      |
| C      |      |     |     |   |    |        |       |       |      |       |      |
| ANISOU | 1112 | CG  | LYS | A | 90 | 4054   | 3785  | 5246  | 508  | 445   | -57  |
| ATOM   | 1113 | CD  | LYS | A | 90 | 25.292 | 6.818 | 5.847 | 1.00 | 39.01 |      |
| C      |      |     |     |   |    |        |       |       |      |       |      |
| ANISOU | 1113 | CD  | LYS | A | 90 | 4494   | 4085  | 6244  | 459  | 541   | -178 |
| ATOM   | 1114 | CE  | LYS | A | 90 | 26.341 | 5.936 | 5.214 | 1.00 | 44.68 |      |
| C      |      |     |     |   |    |        |       |       |      |       |      |
| ANISOU | 1114 | CE  | LYS | A | 90 | 5092   | 4639  | 7247  | 392  | 649   | -227 |
| ATOM   | 1115 | NZ  | LYS | A | 90 | 26.598 | 4.710 | 6.026 | 1.00 | 43.53 |      |
| N1+    |      |     |     |   |    |        |       |       |      |       |      |
| ANISOU | 1115 | NZ  | LYS | A | 90 | 4841   | 4567  | 7133  | 347  | 344   | -279 |
| ATOM   | 1116 | H   | LYS | A | 90 | 20.772 | 8.270 | 7.262 | 1.00 | 0.00  |      |
| H      |      |     |     |   |    |        |       |       |      |       |      |
| ATOM   | 1117 | HA  | LYS | A | 90 | 21.227 | 6.373 | 5.220 | 1.00 | 0.00  |      |
| H      |      |     |     |   |    |        |       |       |      |       |      |
| ATOM   | 1118 | HB3 | LYS | A | 90 | 23.055 | 7.200 | 7.509 | 1.00 | 0.00  |      |
| H      |      |     |     |   |    |        |       |       |      |       |      |
| ATOM   | 1119 | HB2 | LYS | A | 90 | 22.884 | 8.071 | 6.009 | 1.00 | 0.00  |      |
| H      |      |     |     |   |    |        |       |       |      |       |      |
| ATOM   | 1120 | HG3 | LYS | A | 90 | 23.639 | 5.970 | 4.773 | 1.00 | 0.00  |      |
| H      |      |     |     |   |    |        |       |       |      |       |      |
| ATOM   | 1121 | HG2 | LYS | A | 90 | 23.941 | 5.220 | 6.325 | 1.00 | 0.00  |      |
| H      |      |     |     |   |    |        |       |       |      |       |      |
| ATOM   | 1122 | HD3 | LYS | A | 90 | 25.567 | 7.023 | 6.882 | 1.00 | 0.00  |      |
| H      |      |     |     |   |    |        |       |       |      |       |      |
| ATOM   | 1123 | HD2 | LYS | A | 90 | 25.263 | 7.776 | 5.328 | 1.00 | 0.00  |      |
| H      |      |     |     |   |    |        |       |       |      |       |      |
| ATOM   | 1124 | HE3 | LYS | A | 90 | 27.268 | 6.498 | 5.103 | 1.00 | 0.00  |      |
| H      |      |     |     |   |    |        |       |       |      |       |      |
| ATOM   | 1125 | HE2 | LYS | A | 90 | 26.017 | 5.647 | 4.214 | 1.00 | 0.00  |      |
| H      |      |     |     |   |    |        |       |       |      |       |      |
| ATOM   | 1126 | HZ1 | LYS | A | 90 | 27.401 | 4.223 | 5.656 | 1.00 | 0.00  |      |
| H      |      |     |     |   |    |        |       |       |      |       |      |
| ATOM   | 1127 | HZ2 | LYS | A | 90 | 26.777 | 4.972 | 6.985 | 1.00 | 0.00  |      |
| H      |      |     |     |   |    |        |       |       |      |       |      |
| ATOM   | 1128 | HZ3 | LYS | A | 90 | 25.790 | 4.105 | 5.988 | 1.00 | 0.00  |      |
| H      |      |     |     |   |    |        |       |       |      |       |      |
| ATOM   | 1129 | N   | LEU | A | 91 | 21.078 | 5.151 | 8.309 | 1.00 | 31.02 |      |
| N      |      |     |     |   |    |        |       |       |      |       |      |
| ANISOU | 1129 | N   | LEU | A | 91 | 3760   | 3857  | 4170  | 523  | 16    | -1   |

|        |      |      |     |   |    |        |       |        |      |       |     |
|--------|------|------|-----|---|----|--------|-------|--------|------|-------|-----|
| ATOM C | 1130 | CA   | LEU | A | 91 | 20.904 | 3.929 | 9.097  | 1.00 | 30.24 |     |
| ANISOU | 1130 | CA   | LEU | A | 91 | 3704   | 3818  | 3970   | 461  | -119  | -5  |
| ATOM C | 1131 | C    | LEU | A | 91 | 19.716 | 3.105 | 8.589  | 1.00 | 32.65 |     |
| ANISOU | 1131 | C    | LEU | A | 91 | 3988   | 4287  | 4128   | 452  | -55   | 61  |
| ATOM O | 1132 | O    | LEU | A | 91 | 19.849 | 1.893 | 8.410  | 1.00 | 31.22 |     |
| ANISOU | 1132 | O    | LEU | A | 91 | 3791   | 4126  | 3944   | 393  | -105  | 75  |
| ATOM C | 1133 | CB   | LEU | A | 91 | 20.763 | 4.266 | 10.592 | 1.00 | 30.99 |     |
| ANISOU | 1133 | CB   | LEU | A | 91 | 3945   | 3874  | 3954   | 465  | -218  | -56 |
| ATOM C | 1134 | CG   | LEU | A | 91 | 20.362 | 3.122 | 11.559 | 1.00 | 34.73 |     |
| ANISOU | 1134 | CG   | LEU | A | 91 | 4581   | 4372  | 4243   | 421  | -298  | -41 |
| ATOM C | 1135 | CD1  | LEU | A | 91 | 21.446 | 2.034 | 11.632 | 1.00 | 34.70 |     |
| ANISOU | 1135 | CD1  | LEU | A | 91 | 4578   | 4269  | 4337   | 385  | -496  | -63 |
| ATOM C | 1136 | CD2  | LEU | A | 91 | 20.068 | 3.681 | 12.941 | 1.00 | 37.31 |     |
| ANISOU | 1136 | CD2  | LEU | A | 91 | 5153   | 4630  | 4394   | 451  | -330  | -86 |
| ATOM H | 1137 | H    | LEU | A | 91 | 21.026 | 6.024 | 8.814  | 1.00 | 0.00  |     |
| ATOM H | 1138 | HA   | LEU | A | 91 | 21.803 | 3.325 | 8.976  | 1.00 | 0.00  |     |
| ATOM H | 1139 | HB3  | LEU | A | 91 | 20.063 | 5.093 | 10.707 | 1.00 | 0.00  |     |
| ATOM H | 1140 | HB2  | LEU | A | 91 | 21.688 | 4.723 | 10.944 | 1.00 | 0.00  |     |
| ATOM H | 1141 | HG   | LEU | A | 91 | 19.449 | 2.664 | 11.179 | 1.00 | 0.00  |     |
| ATOM H | 1142 | HD11 | LEU | A | 91 | 21.129 | 1.250 | 12.319 | 1.00 | 0.00  |     |
| ATOM H | 1143 | HD12 | LEU | A | 91 | 21.600 | 1.607 | 10.641 | 1.00 | 0.00  |     |
| ATOM H | 1144 | HD13 | LEU | A | 91 | 22.378 | 2.473 | 11.987 | 1.00 | 0.00  |     |
| ATOM H | 1145 | HD21 | LEU | A | 91 | 19.788 | 2.868 | 13.610 | 1.00 | 0.00  |     |
| ATOM H | 1146 | HD22 | LEU | A | 91 | 20.956 | 4.180 | 13.328 | 1.00 | 0.00  |     |
| ATOM H | 1147 | HD23 | LEU | A | 91 | 19.249 | 4.397 | 12.877 | 1.00 | 0.00  |     |
| ATOM N | 1148 | N    | MET | A | 92 | 18.579 | 3.768 | 8.326  | 1.00 | 29.04 |     |
| ANISOU | 1148 | N    | MET | A | 92 | 3510   | 3925  | 3598   | 515  | 40    | 84  |
| ATOM C | 1149 | CA   | MET | A | 92 | 17.371 | 3.123 | 7.801  | 1.00 | 28.72 |     |
| ANISOU | 1149 | CA   | MET | A | 92 | 3392   | 4014  | 3505   | 521  | 63    | 103 |
| ATOM C | 1150 | C    | MET | A | 92 | 17.677 | 2.411 | 6.466  | 1.00 | 31.69 |     |
| ANISOU | 1150 | C    | MET | A | 92 | 3740   | 4402  | 3900   | 524  | 22    | 126 |
| ATOM O | 1151 | O    | MET | A | 92 | 17.341 | 1.237 | 6.317  | 1.00 | 30.48 |     |
| ANISOU | 1151 | O    | MET | A | 92 | 3542   | 4304  | 3735   | 461  | -20   | 119 |
| ATOM C | 1152 | CB   | MET | A | 92 | 16.253 | 4.169 | 7.638  | 1.00 | 31.27 |     |

[illegible]

|        |      |     |     |   |    |        |        |        |      |       |      |
|--------|------|-----|-----|---|----|--------|--------|--------|------|-------|------|
| ATOM   | 1176 | N   | ASP | A | 94 | 20.810 | 1.651  | 5.197  | 1.00 | 28.64 |      |
| N      |      |     |     |   |    |        |        |        |      |       |      |
| ANISOU | 1176 | N   | ASP | A | 94 | 3406   | 3713   | 3764   | 444  | 76    | 122  |
| ATOM   | 1177 | CA  | ASP | A | 94 | 21.841 | 0.644  | 5.445  | 1.00 | 28.81 |      |
| C      |      |     |     |   |    |        |        |        |      |       |      |
| ANISOU | 1177 | CA  | ASP | A | 94 | 3373   | 3640   | 3935   | 361  | 22    | 87   |
| ATOM   | 1178 | C   | ASP | A | 94 | 21.232 | -0.643 | 6.012  | 1.00 | 31.76 |      |
| C      |      |     |     |   |    |        |        |        |      |       |      |
| ANISOU | 1178 | C   | ASP | A | 94 | 3744   | 4120   | 4205   | 298  | -99   | 97   |
| ATOM   | 1179 | O   | ASP | A | 94 | 21.659 | -1.722 | 5.613  | 1.00 | 30.42 |      |
| O      |      |     |     |   |    |        |        |        |      |       |      |
| ANISOU | 1179 | O   | ASP | A | 94 | 3554   | 3912   | 4092   | 249  | -115  | 91   |
| ATOM   | 1180 | CB  | ASP | A | 94 | 22.941 | 1.170  | 6.389  | 1.00 | 31.29 |      |
| C      |      |     |     |   |    |        |        |        |      |       |      |
| ANISOU | 1180 | CB  | ASP | A | 94 | 3629   | 3799   | 4463   | 344  | -50   | 16   |
| ATOM   | 1181 | CG  | ASP | A | 94 | 23.882 | 2.196  | 5.781  | 1.00 | 38.33 |      |
| C      |      |     |     |   |    |        |        |        |      |       |      |
| ANISOU | 1181 | CG  | ASP | A | 94 | 4470   | 4506   | 5586   | 368  | 115   | -24  |
| ATOM   | 1182 | OD1 | ASP | A | 94 | 23.926 | 2.305  | 4.526  | 1.00 | 38.45 |      |
| O      |      |     |     |   |    |        |        |        |      |       |      |
| ANISOU | 1182 | OD1 | ASP | A | 94 | 4546   | 4476   | 5588   | 394  | 328   | 18   |
| ATOM   | 1183 | OD2 | ASP | A | 94 | 24.592 | 2.873  | 6.552  | 1.00 | 39.31 |      |
| O1-    |      |     |     |   |    |        |        |        |      |       |      |
| ANISOU | 1183 | OD2 | ASP | A | 94 | 4523   | 4503   | 5911   | 364  | 41    | -107 |
| ATOM   | 1184 | H   | ASP | A | 94 | 20.896 | 2.526  | 5.695  | 1.00 | 0.00  |      |
| H      |      |     |     |   |    |        |        |        |      |       |      |
| ATOM   | 1185 | HA  | ASP | A | 94 | 22.308 | 0.401  | 4.490  | 1.00 | 0.00  |      |
| H      |      |     |     |   |    |        |        |        |      |       |      |
| ATOM   | 1186 | HB3 | ASP | A | 94 | 23.522 | 0.330  | 6.769  | 1.00 | 0.00  |      |
| H      |      |     |     |   |    |        |        |        |      |       |      |
| ATOM   | 1187 | HB2 | ASP | A | 94 | 22.479 | 1.590  | 7.282  | 1.00 | 0.00  |      |
| H      |      |     |     |   |    |        |        |        |      |       |      |
| ATOM   | 1188 | N   | ASN | A | 95 | 20.218 | -0.533 | 6.898  | 1.00 | 28.75 |      |
| N      |      |     |     |   |    |        |        |        |      |       |      |
| ANISOU | 1188 | N   | ASN | A | 95 | 3394   | 3843   | 3688   | 296  | -137  | 108  |
| ATOM   | 1189 | CA  | ASN | A | 95 | 19.547 | -1.703 | 7.495  | 1.00 | 28.50 |      |
| C      |      |     |     |   |    |        |        |        |      |       |      |
| ANISOU | 1189 | CA  | ASN | A | 95 | 3387   | 3874   | 3569   | 226  | -172  | 118  |
| ATOM   | 1190 | C   | ASN | A | 95 | 18.859 | -2.533 | 6.421  | 1.00 | 30.85 |      |
| C      |      |     |     |   |    |        |        |        |      |       |      |
| ANISOU | 1190 | C   | ASN | A | 95 | 3614   | 4257   | 3852   | 203  | -143  | 120  |
| ATOM   | 1191 | O   | ASN | A | 95 | 19.038 | -3.752 | 6.380  | 1.00 | 28.97 |      |
| O      |      |     |     |   |    |        |        |        |      |       |      |
| ANISOU | 1191 | O   | ASN | A | 95 | 3377   | 3998   | 3632   | 132  | -172  | 119  |
| ATOM   | 1192 | CB  | ASN | A | 95 | 18.536 | -1.267 | 8.559  | 1.00 | 27.93 |      |
| C      |      |     |     |   |    |        |        |        |      |       |      |
| ANISOU | 1192 | CB  | ASN | A | 95 | 3375   | 3852   | 3386   | 229  | -117  | 119  |
| ATOM   | 1193 | CG  | ASN | A | 95 | 19.157 | -0.765 | 9.838  | 1.00 | 34.90 |      |
| C      |      |     |     |   |    |        |        |        |      |       |      |
| ANISOU | 1193 | CG  | ASN | A | 95 | 4417   | 4626   | 4217   | 244  | -185  | 104  |
| ATOM   | 1194 | OD1 | ASN | A | 95 | 20.310 | -1.059 | 10.158 | 1.00 | 28.27 |      |
| O      |      |     |     |   |    |        |        |        |      |       |      |
| ANISOU | 1194 | OD1 | ASN | A | 95 | 3632   | 3667   | 3443   | 243  | -336  | 83   |
| ATOM   | 1195 | ND2 | ASN | A | 95 | 18.370 | -0.069 | 10.642 | 1.00 | 29.75 |      |
| N      |      |     |     |   |    |        |        |        |      |       |      |
| ANISOU | 1195 | ND2 | ASN | A | 95 | 3853   | 3992   | 3460   | 265  | -91   | 98   |

|        |      |      |       |    |        |        |        |      |       |     |
|--------|------|------|-------|----|--------|--------|--------|------|-------|-----|
| ATOM H | 1196 | H    | ASN A | 95 | 19.889 | 0.380  | 7.178  | 1.00 | 0.00  |     |
| ATOM H | 1197 | HA   | ASN A | 95 | 20.304 | -2.324 | 7.975  | 1.00 | 0.00  |     |
| ATOM H | 1198 | HB3  | ASN A | 95 | 17.868 | -2.098 | 8.784  | 1.00 | 0.00  |     |
| ATOM H | 1199 | HB2  | ASN A | 95 | 17.887 | -0.495 | 8.146  | 1.00 | 0.00  |     |
| ATOM H | 1200 | HD22 | ASN A | 95 | 18.731 | 0.293  | 11.513 | 1.00 | 0.00  |     |
| ATOM H | 1201 | HD21 | ASN A | 95 | 17.408 | 0.100  | 10.385 | 1.00 | 0.00  |     |
| ATOM N | 1202 | N    | ALA A | 96 | 18.118 | -1.860 | 5.521  | 1.00 | 26.93 |     |
| ANISOU | 1202 | N    | ALA A | 96 | 3075   | 3835   | 3322   | 278  | -116  | 113 |
| ATOM C | 1203 | CA   | ALA A | 96 | 17.422 | -2.523 | 4.425  | 1.00 | 27.50 |     |
| ANISOU | 1203 | CA   | ALA A | 96 | 3108   | 3970   | 3372   | 288  | -161  | 84  |
| ATOM C | 1204 | C    | ALA A | 96 | 18.404 | -3.185 | 3.462  | 1.00 | 30.12 |     |
| ANISOU | 1204 | C    | ALA A | 96 | 3520   | 4219   | 3706   | 276  | -154  | 89  |
| ATOM O | 1205 | O    | ALA A | 96 | 18.094 | -4.242 | 2.931  | 1.00 | 29.61 |     |
| ANISOU | 1205 | O    | ALA A | 96 | 3444   | 4176   | 3631   | 233  | -202  | 56  |
| ATOM C | 1206 | CB   | ALA A | 96 | 16.531 | -1.536 | 3.693  | 1.00 | 29.00 |     |
| ANISOU | 1206 | CB   | ALA A | 96 | 3287   | 4216   | 3515   | 415  | -203  | 66  |
| ATOM H | 1207 | H    | ALA A | 96 | 18.028 | -0.856 | 5.590  | 1.00 | 0.00  |     |
| ATOM H | 1208 | HA   | ALA A | 96 | 16.788 | -3.301 | 4.849  | 1.00 | 0.00  |     |
| ATOM H | 1209 | HB1  | ALA A | 96 | 16.018 | -2.045 | 2.877  | 1.00 | 0.00  |     |
| ATOM H | 1210 | HB2  | ALA A | 96 | 15.795 | -1.127 | 4.386  | 1.00 | 0.00  |     |
| ATOM H | 1211 | HB3  | ALA A | 96 | 17.139 | -0.726 | 3.290  | 1.00 | 0.00  |     |
| ATOM N | 1212 | N    | MET A | 97 | 19.601 | -2.589 | 3.267  | 1.00 | 26.92 |     |
| ANISOU | 1212 | N    | MET A | 97 | 3183   | 3691   | 3354   | 304  | -69   | 114 |
| ATOM C | 1213 | CA   | MET A | 97 | 20.617 | -3.168 | 2.374  | 1.00 | 26.68 |     |
| ANISOU | 1213 | CA   | MET A | 97 | 3221   | 3534   | 3382   | 287  | 16    | 107 |
| ATOM C | 1214 | C    | MET A | 97 | 21.410 | -4.297 | 3.046  | 1.00 | 30.02 |     |
| ANISOU | 1214 | C    | MET A | 97 | 3561   | 3890   | 3955   | 186  | -21   | 89  |
| ATOM O | 1215 | O    | MET A | 97 | 21.990 | -5.133 | 2.353  | 1.00 | 28.98 |     |
| ANISOU | 1215 | O    | MET A | 97 | 3455   | 3673   | 3882   | 156  | 36    | 68  |
| ATOM C | 1216 | CB   | MET A | 97 | 21.532 | -2.083 | 1.783  | 1.00 | 29.95 |     |
| ANISOU | 1216 | CB   | MET A | 97 | 3724   | 3793   | 3862   | 352  | 192   | 122 |
| ATOM C | 1217 | CG   | MET A | 97 | 20.785 | -1.106 | 0.871  | 1.00 | 34.57 |     |
| ANISOU | 1217 | CG   | MET A | 97 | 4485   | 4400   | 4249   | 480  | 231   | 154 |
| ATOM S | 1218 | SD   | MET A | 97 | 21.865 | 0.099  | 0.076  | 1.00 | 40.87 |     |

|        |      |      |     |   |    |        |        |       |      |       |     |
|--------|------|------|-----|---|----|--------|--------|-------|------|-------|-----|
| ANISOU | 1218 | SD   | MET | A | 97 | 5470   | 4952   | 5107  | 550  | 534   | 185 |
| ATOM   | 1219 | CE   | MET | A | 97 | 22.137 | 1.218  | 1.401 | 1.00 | 38.16 |     |
| C      |      |      |     |   |    |        |        |       |      |       |     |
| ANISOU | 1219 | CE   | MET | A | 97 | 4923   | 4593   | 4983  | 517  | 522   | 170 |
| ATOM   | 1220 | H    | MET | A | 97 | 19.817 | -1.723 | 3.740 | 1.00 | 0.00  |     |
| H      |      |      |     |   |    |        |        |       |      |       |     |
| ATOM   | 1221 | HA   | MET | A | 97 | 20.081 | -3.616 | 1.537 | 1.00 | 0.00  |     |
| H      |      |      |     |   |    |        |        |       |      |       |     |
| ATOM   | 1222 | HB3  | MET | A | 97 | 22.339 | -2.555 | 1.224 | 1.00 | 0.00  |     |
| H      |      |      |     |   |    |        |        |       |      |       |     |
| ATOM   | 1223 | HB2  | MET | A | 97 | 22.008 | -1.530 | 2.593 | 1.00 | 0.00  |     |
| H      |      |      |     |   |    |        |        |       |      |       |     |
| ATOM   | 1224 | HG3  | MET | A | 97 | 20.022 | -0.583 | 1.448 | 1.00 | 0.00  |     |
| H      |      |      |     |   |    |        |        |       |      |       |     |
| ATOM   | 1225 | HG2  | MET | A | 97 | 20.243 | -1.665 | 0.108 | 1.00 | 0.00  |     |
| H      |      |      |     |   |    |        |        |       |      |       |     |
| ATOM   | 1226 | HE1  | MET | A | 97 | 22.790 | 2.025  | 1.068 | 1.00 | 0.00  |     |
| H      |      |      |     |   |    |        |        |       |      |       |     |
| ATOM   | 1227 | HE2  | MET | A | 97 | 21.184 | 1.634  | 1.728 | 1.00 | 0.00  |     |
| H      |      |      |     |   |    |        |        |       |      |       |     |
| ATOM   | 1228 | HE3  | MET | A | 97 | 22.607 | 0.691  | 2.232 | 1.00 | 0.00  |     |
| H      |      |      |     |   |    |        |        |       |      |       |     |
| ATOM   | 1229 | N    | THR | A | 98 | 21.438 | -4.325 | 4.385 | 1.00 | 26.29 |     |
| N      |      |      |     |   |    |        |        |       |      |       |     |
| ANISOU | 1229 | N    | THR | A | 98 | 3031   | 3431   | 3528  | 148  | -120  | 94  |
| ATOM   | 1230 | CA   | THR | A | 98 | 22.106 | -5.390 | 5.141 | 1.00 | 26.59 |     |
| C      |      |      |     |   |    |        |        |       |      |       |     |
| ANISOU | 1230 | CA   | THR | A | 98 | 3049   | 3384   | 3670  | 86   | -214  | 83  |
| ATOM   | 1231 | C    | THR | A | 98 | 21.176 | -6.621 | 5.234 | 1.00 | 30.26 |     |
| C      |      |      |     |   |    |        |        |       |      |       |     |
| ANISOU | 1231 | C    | THR | A | 98 | 3538   | 3935   | 4026  | 16   | -241  | 97  |
| ATOM   | 1232 | O    | THR | A | 98 | 21.630 | -7.754 | 5.042 | 1.00 | 29.16 |     |
| O      |      |      |     |   |    |        |        |       |      |       |     |
| ANISOU | 1232 | O    | THR | A | 98 | 3398   | 3722   | 3959  | -30  | -259  | 87  |
| ATOM   | 1233 | CB   | THR | A | 98 | 22.541 | -4.873 | 6.532 | 1.00 | 32.40 |     |
| C      |      |      |     |   |    |        |        |       |      |       |     |
| ANISOU | 1233 | CB   | THR | A | 98 | 3810   | 4053   | 4448  | 105  | -342  | 77  |
| ATOM   | 1234 | OG1  | THR | A | 98 | 23.505 | -3.840 | 6.354 | 1.00 | 34.00 |     |
| O      |      |      |     |   |    |        |        |       |      |       |     |
| ANISOU | 1234 | OG1  | THR | A | 98 | 3942   | 4141   | 4835  | 153  | -317  | 32  |
| ATOM   | 1235 | CG2  | THR | A | 98 | 23.141 | -5.973 | 7.417 | 1.00 | 33.33 |     |
| C      |      |      |     |   |    |        |        |       |      |       |     |
| ANISOU | 1235 | CG2  | THR | A | 98 | 3981   | 4056   | 4625  | 79   | -506  | 70  |
| ATOM   | 1236 | H    | THR | A | 98 | 20.987 | -3.593 | 4.915 | 1.00 | 0.00  |     |
| H      |      |      |     |   |    |        |        |       |      |       |     |
| ATOM   | 1237 | HA   | THR | A | 98 | 23.002 | -5.683 | 4.593 | 1.00 | 0.00  |     |
| H      |      |      |     |   |    |        |        |       |      |       |     |
| ATOM   | 1238 | HB   | THR | A | 98 | 21.670 | -4.455 | 7.037 | 1.00 | 0.00  |     |
| H      |      |      |     |   |    |        |        |       |      |       |     |
| ATOM   | 1239 | HG1  | THR | A | 98 | 23.061 | -3.029 | 6.096 | 1.00 | 0.00  |     |
| H      |      |      |     |   |    |        |        |       |      |       |     |
| ATOM   | 1240 | HG21 | THR | A | 98 | 23.427 | -5.550 | 8.380 | 1.00 | 0.00  |     |
|        |      |      |     |   |    |        |        |       |      |       |     |

|        |      |     |     |   |     |        |         |       |      |       |      |
|--------|------|-----|-----|---|-----|--------|---------|-------|------|-------|------|
| ATOM   | 1243 | N   | TYR | A | 99  | 19.890 | -6.403  | 5.561 | 1.00 | 27.09 |      |
| N      |      |     |     |   |     |        |         |       |      |       |      |
| ANISOU | 1243 | N   | TYR | A | 99  | 3137   | 3659    | 3498  | 5    | -224  | 106  |
| ATOM   | 1244 | CA  | TYR | A | 99  | 18.965 | -7.528  | 5.739 | 1.00 | 27.77 |      |
| C      |      |     |     |   |     |        |         |       |      |       |      |
| ANISOU | 1244 | CA  | TYR | A | 99  | 3209   | 3789    | 3553  | -79  | -205  | 96   |
| ATOM   | 1245 | C   | TYR | A | 99  | 18.535 | -8.185  | 4.417 | 1.00 | 31.81 |      |
| C      |      |     |     |   |     |        |         |       |      |       |      |
| ANISOU | 1245 | C   | TYR | A | 99  | 3658   | 4346    | 4082  | -95  | -210  | 41   |
| ATOM   | 1246 | O   | TYR | A | 99  | 18.454 | -9.418  | 4.348 | 1.00 | 30.88 |      |
| O      |      |     |     |   |     |        |         |       |      |       |      |
| ANISOU | 1246 | O   | TYR | A | 99  | 3537   | 4190    | 4005  | -175 | -209  | 21   |
| ATOM   | 1247 | CB  | TYR | A | 99  | 17.746 | -7.120  | 6.592 | 1.00 | 29.22 |      |
| C      |      |     |     |   |     |        |         |       |      |       |      |
| ANISOU | 1247 | CB  | TYR | A | 99  | 3379   | 4041    | 3683  | -97  | -131  | 95   |
| ATOM   | 1248 | CG  | TYR | A | 99  | 16.704 | -8.208  | 6.729 | 1.00 | 31.50 |      |
| C      |      |     |     |   |     |        |         |       |      |       |      |
| ANISOU | 1248 | CG  | TYR | A | 99  | 3610   | 4338    | 4022  | -200 | -47   | 60   |
| ATOM   | 1249 | CD1 | TYR | A | 99  | 16.810 | -9.183  | 7.718 | 1.00 | 34.36 |      |
| C      |      |     |     |   |     |        |         |       |      |       |      |
| ANISOU | 1249 | CD1 | TYR | A | 99  | 4111   | 4588    | 4356  | -282 | 31    | 101  |
| ATOM   | 1250 | CD2 | TYR | A | 99  | 15.616 | -8.270  | 5.865 | 1.00 | 32.50 |      |
| C      |      |     |     |   |     |        |         |       |      |       |      |
| ANISOU | 1250 | CD2 | TYR | A | 99  | 3556   | 4551    | 4243  | -208 | -55   | -29  |
| ATOM   | 1251 | CE1 | TYR | A | 99  | 15.857 | -10.200 | 7.836 | 1.00 | 35.17 |      |
| C      |      |     |     |   |     |        |         |       |      |       |      |
| ANISOU | 1251 | CE1 | TYR | A | 99  | 4160   | 4658    | 4547  | -394 | 169   | 63   |
| ATOM   | 1252 | CE2 | TYR | A | 99  | 14.679 | -9.294  | 5.953 | 1.00 | 34.67 |      |
| C      |      |     |     |   |     |        |         |       |      |       |      |
| ANISOU | 1252 | CE2 | TYR | A | 99  | 3723   | 4800    | 4650  | -317 | 26    | -96  |
| ATOM   | 1253 | CZ  | TYR | A | 99  | 14.796 | -10.252 | 6.945 | 1.00 | 40.75 |      |
| C      |      |     |     |   |     |        |         |       |      |       |      |
| ANISOU | 1253 | CZ  | TYR | A | 99  | 4618   | 5452    | 5413  | -423 | 175   | -47  |
| ATOM   | 1254 | OH  | TYR | A | 99  | 13.846 | -11.243 | 7.017 | 1.00 | 38.82 |      |
| O      |      |     |     |   |     |        |         |       |      |       |      |
| ANISOU | 1254 | OH  | TYR | A | 99  | 4263   | 5148    | 5339  | -546 | 313   | -121 |
| ATOM   | 1255 | H   | TYR | A | 99  | 19.554 | -5.459  | 5.686 | 1.00 | 0.00  |      |
| H      |      |     |     |   |     |        |         |       |      |       |      |
| ATOM   | 1256 | HA  | TYR | A | 99  | 19.503 | -8.288  | 6.306 | 1.00 | 0.00  |      |
| H      |      |     |     |   |     |        |         |       |      |       |      |
| ATOM   | 1257 | HB3 | TYR | A | 99  | 17.285 | -6.230  | 6.162 | 1.00 | 0.00  |      |
| H      |      |     |     |   |     |        |         |       |      |       |      |
| ATOM   | 1258 | HB2 | TYR | A | 99  | 18.084 | -6.816  | 7.583 | 1.00 | 0.00  |      |
| H      |      |     |     |   |     |        |         |       |      |       |      |
| ATOM   | 1259 | HD1 | TYR | A | 99  | 17.639 | -9.162  | 8.410 | 1.00 | 0.00  |      |
| H      |      |     |     |   |     |        |         |       |      |       |      |
| ATOM   | 1260 | HD2 | TYR | A | 99  | 15.485 | -7.513  | 5.106 | 1.00 | 0.00  |      |
| H      |      |     |     |   |     |        |         |       |      |       |      |
| ATOM   | 1261 | HE1 | TYR | A | 99  | 15.950 | -10.939 | 8.618 | 1.00 | 0.00  |      |
| H      |      |     |     |   |     |        |         |       |      |       |      |
| ATOM   | 1262 | HE2 | TYR | A | 99  | 13.862 | -9.341  | 5.248 | 1.00 | 0.00  |      |
| H      |      |     |     |   |     |        |         |       |      |       |      |
| ATOM   | 1263 | HH  | TYR | A | 99  | 13.982 | -11.760 | 7.814 | 1.00 | 0.00  |      |
| H      |      |     |     |   |     |        |         |       |      |       |      |
| ATOM   | 1264 | N   | ASN | A | 100 | 18.205 | -7.368  | 3.408 | 1.00 | 27.74 |      |
| N      |      |     |     |   |     |        |         |       |      |       |      |
| ANISOU | 1264 | N   | ASN | A | 100 | 3133   | 3891    | 3515  | -9   | -231  | 12   |

|        |      |      |     |   |     |        |         |        |      |       |      |
|--------|------|------|-----|---|-----|--------|---------|--------|------|-------|------|
| ATOM   | 1265 | CA   | ASN | A | 100 | 17.700 | -7.811  | 2.106  | 1.00 | 27.72 |      |
| C      |      |      |     |   |     |        |         |        |      |       |      |
| ANISOU | 1265 | CA   | ASN | A | 100 | 3146   | 3914    | 3471   | 15   | -296  | -58  |
| ATOM   | 1266 | C    | ASN | A | 100 | 18.795 | -7.971  | 1.070  | 1.00 | 30.05 |      |
| C      |      |      |     |   |     |        |         |        |      |       |      |
| ANISOU | 1266 | C    | ASN | A | 100 | 3592   | 4102    | 3724   | 53   | -241  | -51  |
| ATOM   | 1267 | O    | ASN | A | 100 | 19.711 | -7.154  | 1.029  | 1.00 | 28.99 |      |
| O      |      |      |     |   |     |        |         |        |      |       |      |
| ANISOU | 1267 | O    | ASN | A | 100 | 3523   | 3891    | 3601   | 107  | -144  | -4   |
| ATOM   | 1268 | CB   | ASN | A | 100 | 16.659 | -6.827  | 1.591  | 1.00 | 30.73 |      |
| C      |      |      |     |   |     |        |         |        |      |       |      |
| ANISOU | 1268 | CB   | ASN | A | 100 | 3501   | 4384    | 3792   | 122  | -389  | -100 |
| ATOM   | 1269 | CG   | ASN | A | 100 | 15.541 | -6.572  | 2.569  | 1.00 | 39.65 |      |
| C      |      |      |     |   |     |        |         |        |      |       |      |
| ANISOU | 1269 | CG   | ASN | A | 100 | 4449   | 5590    | 5027   | 88   | -387  | -127 |
| ATOM   | 1270 | OD1  | ASN | A | 100 | 14.656 | -7.400  | 2.735  | 1.00 | 31.96 |      |
| O      |      |      |     |   |     |        |         |        |      |       |      |
| ANISOU | 1270 | OD1  | ASN | A | 100 | 3332   | 4634    | 4178   | 7    | -408  | -207 |
| ATOM   | 1271 | ND2  | ASN | A | 100 | 15.581 | -5.438  | 3.269  | 1.00 | 28.95 |      |
| N      |      |      |     |   |     |        |         |        |      |       |      |
| ANISOU | 1271 | ND2  | ASN | A | 100 | 3095   | 4252    | 3652   | 141  | -323  | -73  |
| ATOM   | 1272 | H    | ASN | A | 100 | 18.298 | -6.368  | 3.517  | 1.00 | 0.00  |      |
| H      |      |      |     |   |     |        |         |        |      |       |      |
| ATOM   | 1273 | HA   | ASN | A | 100 | 17.216 | -8.778  | 2.241  | 1.00 | 0.00  |      |
| H      |      |      |     |   |     |        |         |        |      |       |      |
| ATOM   | 1274 | HB3  | ASN | A | 100 | 16.243 | -7.198  | 0.654  | 1.00 | 0.00  |      |
| H      |      |      |     |   |     |        |         |        |      |       |      |
| ATOM   | 1275 | HB2  | ASN | A | 100 | 17.145 | -5.883  | 1.343  | 1.00 | 0.00  |      |
| H      |      |      |     |   |     |        |         |        |      |       |      |
| ATOM   | 1276 | HD22 | ASN | A | 100 | 14.851 | -5.229  | 3.935  | 1.00 | 0.00  |      |
| H      |      |      |     |   |     |        |         |        |      |       |      |
| ATOM   | 1277 | HD21 | ASN | A | 100 | 16.342 | -4.787  | 3.133  | 1.00 | 0.00  |      |
| H      |      |      |     |   |     |        |         |        |      |       |      |
| ATOM   | 1278 | N    | ARG | A | 101 | 18.673 | -8.994  | 0.191  | 1.00 | 27.68 |      |
| N      |      |      |     |   |     |        |         |        |      |       |      |
| ANISOU | 1278 | N    | ARG | A | 101 | 3352   | 3771    | 3395   | 25   | -277  | -115 |
| ATOM   | 1279 | CA   | ARG | A | 101 | 19.653 | -9.254  | -0.871 | 1.00 | 27.48 |      |
| C      |      |      |     |   |     |        |         |        |      |       |      |
| ANISOU | 1279 | CA   | ARG | A | 101 | 3512   | 3611    | 3319   | 57   | -169  | -123 |
| ATOM   | 1280 | C    | ARG | A | 101 | 19.583 | -8.211  | -1.982 | 1.00 | 31.53 |      |
| C      |      |      |     |   |     |        |         |        |      |       |      |
| ANISOU | 1280 | C    | ARG | A | 101 | 4259   | 4087    | 3635   | 202  | -143  | -122 |
| ATOM   | 1281 | O    | ARG | A | 101 | 18.542 | -7.569  | -2.107 | 1.00 | 31.09 |      |
| O      |      |      |     |   |     |        |         |        |      |       |      |
| ANISOU | 1281 | O    | ARG | A | 101 | 4205   | 4133    | 3475   | 283  | -304  | -143 |
| ATOM   | 1282 | CB   | ARG | A | 101 | 19.539 | -10.689 | -1.402 | 1.00 | 27.45 |      |
| C      |      |      |     |   |     |        |         |        |      |       |      |
| ANISOU | 1282 | CB   | ARG | A | 101 | 3536   | 3568    | 3326   | -17  | -208  | -199 |
| ATOM   | 1283 | CG   | ARG | A | 101 | 20.231 | -11.664 | -0.467 | 1.00 | 31.09 |      |
| C      |      |      |     |   |     |        |         |        |      |       |      |
| ANISOU | 1283 | CG   | ARG | A | 101 | 3869   | 3963    | 3980   | -131 | -144  | -168 |
| ATOM   | 1284 | CD   | ARG | A | 101 | 20.126 | -13.089 | -0.950 | 1.00 | 33.18 |      |
| C      |      |      |     |   |     |        |         |        |      |       |      |
| ANISOU | 1284 | CD   | ARG | A | 101 | 4161   | 4172    | 4274   | -209 | -161  | -241 |
| ATOM   | 1285 | NE   | ARG | A | 101 | 20.898 | -13.990 | -0.093 | 1.00 | 33.84 |      |
| N      |      |      |     |   |     |        |         |        |      |       |      |
| ANISOU | 1285 | NE   | ARG | A | 101 | 4162   | 4159    | 4538   | -290 | -105  | -199 |

|        |      |      |     |   |     |        |         |        |      |       |      |
|--------|------|------|-----|---|-----|--------|---------|--------|------|-------|------|
| ATOM   | 1286 | CZ   | ARG | A | 101 | 21.265 | -15.221 | -0.434 | 1.00 | 39.06 |      |
| C      |      |      |     |   |     |        |         |        |      |       |      |
| ANISOU | 1286 | CZ   | ARG | A | 101 | 4852   | 4713    | 5274   | -350 | -67   | -242 |
| ATOM   | 1287 | NH1  | ARG | A | 101 | 20.927 | -15.717 | -1.618 | 1.00 | 30.71 |      |
| N      |      |      |     |   |     |        |         |        |      |       |      |
| ANISOU | 1287 | NH1  | ARG | A | 101 | 3913   | 3637    | 4116   | -351 | -71   | -339 |
| ATOM   | 1288 | NH2  | ARG | A | 101 | 21.985 | -15.961 | 0.400  | 1.00 | 32.66 |      |
| N1+    |      |      |     |   |     |        |         |        |      |       |      |
| ANISOU | 1288 | NH2  | ARG | A | 101 | 3984   | 3795    | 4632   | -394 | -49   | -196 |
| ATOM   | 1289 | H    | ARG | A | 101 | 17.881 | -9.618  | 0.249  | 1.00 | 0.00  |      |
| H      |      |      |     |   |     |        |         |        |      |       |      |
| ATOM   | 1290 | HA   | ARG | A | 101 | 20.640 | -9.164  | -0.417 | 1.00 | 0.00  |      |
| H      |      |      |     |   |     |        |         |        |      |       |      |
| ATOM   | 1291 | HB3  | ARG | A | 101 | 19.995 | -10.748 | -2.390 | 1.00 | 0.00  |      |
| H      |      |      |     |   |     |        |         |        |      |       |      |
| ATOM   | 1292 | HB2  | ARG | A | 101 | 18.487 | -10.959 | -1.495 | 1.00 | 0.00  |      |
| H      |      |      |     |   |     |        |         |        |      |       |      |
| ATOM   | 1293 | HG3  | ARG | A | 101 | 19.793 | -11.585 | 0.528  | 1.00 | 0.00  |      |
| H      |      |      |     |   |     |        |         |        |      |       |      |
| ATOM   | 1294 | HG2  | ARG | A | 101 | 21.282 | -11.390 | -0.371 | 1.00 | 0.00  |      |
| H      |      |      |     |   |     |        |         |        |      |       |      |
| ATOM   | 1295 | HD3  | ARG | A | 101 | 20.498 | -13.154 | -1.973 | 1.00 | 0.00  |      |
| H      |      |      |     |   |     |        |         |        |      |       |      |
| ATOM   | 1296 | HD2  | ARG | A | 101 | 19.080 | -13.396 | -0.950 | 1.00 | 0.00  |      |
| H      |      |      |     |   |     |        |         |        |      |       |      |
| ATOM   | 1297 | HE   | ARG | A | 101 | 21.152 | -13.620 | 0.812  | 1.00 | 0.00  |      |
| H      |      |      |     |   |     |        |         |        |      |       |      |
| ATOM   | 1298 | HH12 | ARG | A | 101 | 21.208 | -16.653 | -1.872 | 1.00 | 0.00  |      |
| H      |      |      |     |   |     |        |         |        |      |       |      |
| ATOM   | 1299 | HH11 | ARG | A | 101 | 20.388 | -15.158 | -2.264 | 1.00 | 0.00  |      |
| H      |      |      |     |   |     |        |         |        |      |       |      |
| ATOM   | 1300 | HH22 | ARG | A | 101 | 22.261 | -16.896 | 0.136  | 1.00 | 0.00  |      |
| H      |      |      |     |   |     |        |         |        |      |       |      |
| ATOM   | 1301 | HH21 | ARG | A | 101 | 22.257 | -15.589 | 1.299  | 1.00 | 0.00  |      |
| H      |      |      |     |   |     |        |         |        |      |       |      |
| ATOM   | 1302 | N    | PRO | A | 102 | 20.660 | -8.004  | -2.792 | 1.00 | 29.85 |      |
| N      |      |      |     |   |     |        |         |        |      |       |      |
| ANISOU | 1302 | N    | PRO | A | 102 | 4261   | 3698    | 3382   | 245  | 79    | -100 |
| ATOM   | 1303 | CA   | PRO | A | 102 | 20.636 | -6.914  | -3.788 | 1.00 | 30.92 |      |
| C      |      |      |     |   |     |        |         |        |      |       |      |
| ANISOU | 1303 | CA   | PRO | A | 102 | 4705   | 3751    | 3293   | 394  | 162   | -75  |
| ATOM   | 1304 | C    | PRO | A | 102 | 19.560 | -6.968  | -4.872 | 1.00 | 36.10 |      |
| C      |      |      |     |   |     |        |         |        |      |       |      |
| ANISOU | 1304 | C    | PRO | A | 102 | 5631   | 4440    | 3646   | 520  | -67   | -140 |
| ATOM   | 1305 | O    | PRO | A | 102 | 19.207 | -5.911  | -5.402 | 1.00 | 36.59 |      |
| O      |      |      |     |   |     |        |         |        |      |       |      |
| ANISOU | 1305 | O    | PRO | A | 102 | 5920   | 4474    | 3509   | 671  | -107  | -108 |
| ATOM   | 1306 | CB   | PRO | A | 102 | 22.037 | -6.968  | -4.404 | 1.00 | 33.21 |      |
| C      |      |      |     |   |     |        |         |        |      |       |      |
| ANISOU | 1306 | CB   | PRO | A | 102 | 5172   | 3794    | 3654   | 381  | 522   | -59  |
| ATOM   | 1307 | CG   | PRO | A | 102 | 22.885 | -7.583  | -3.333 | 1.00 | 35.13 |      |
| C      |      |      |     |   |     |        |         |        |      |       |      |
| ANISOU | 1307 | CG   | PRO | A | 102 | 5075   | 4019    | 4255   | 244  | 582   | -62  |
| ATOM   | 1308 | CD   | PRO | A | 102 | 21.994 | -8.643  | -2.757 | 1.00 | 30.55 |      |
| C      |      |      |     |   |     |        |         |        |      |       |      |
| ANISOU | 1308 | CD   | PRO | A | 102 | 4319   | 3618    | 3671   | 168  | 303   | -98  |

|          |      |     |     |   |     |        |         |        |      |            |
|----------|------|-----|-----|---|-----|--------|---------|--------|------|------------|
| ATOM H   | 1309 | HA  | PRO | A | 102 | 20.535 | -5.969  | -3.255 | 1.00 | 0.00       |
| ATOM H   | 1310 | HB3 | PRO | A | 102 | 22.384 | -5.954  | -4.601 | 1.00 | 0.00       |
| ATOM H   | 1311 | HB2 | PRO | A | 102 | 22.023 | -7.624  | -5.274 | 1.00 | 0.00       |
| ATOM H   | 1312 | HG3 | PRO | A | 102 | 23.096 | -6.836  | -2.568 | 1.00 | 0.00       |
| ATOM H   | 1313 | HG2 | PRO | A | 102 | 23.756 | -8.054  | -3.789 | 1.00 | 0.00       |
| ATOM H   | 1314 | HD2 | PRO | A | 102 | 21.994 | -9.510  | -3.417 | 1.00 | 0.00       |
| ATOM H   | 1315 | HD3 | PRO | A | 102 | 22.277 | -8.827  | -1.721 | 1.00 | 0.00       |
| ATOM N   | 1316 | N   | ASP | A | 103 | 19.029 | -8.163  | -5.193 | 1.00 | 32.86      |
| ANISOU   | 1316 | N   | ASP | A | 103 | 5207   | 4070    | 3210   | 471  | -246 -240  |
| ATOM C   | 1317 | CA  | ASP | A | 103 | 18.009 | -8.302  | -6.239 | 1.00 | 34.36      |
| ANISOU   | 1317 | CA  | ASP | A | 103 | 5645   | 4266    | 3144   | 600  | -544 -346  |
| ATOM C   | 1318 | C   | ASP | A | 103 | 16.569 | -8.151  | -5.714 | 1.00 | 39.45      |
| ANISOU   | 1318 | C   | ASP | A | 103 | 5991   | 5096    | 3904   | 621  | -911 -427  |
| ATOM O   | 1319 | O   | ASP | A | 103 | 15.620 | -8.480  | -6.428 | 1.00 | 42.09      |
| ANISOU   | 1319 | O   | ASP | A | 103 | 6411   | 5439    | 4143   | 707  | -1241 -564 |
| ATOM C   | 1320 | CB  | ASP | A | 103 | 18.202 | -9.622  | -7.020 | 1.00 | 37.20      |
| ANISOU   | 1320 | CB  | ASP | A | 103 | 6177   | 4529    | 3428   | 549  | -555 -448  |
| ATOM C   | 1321 | CG  | ASP | A | 103 | 18.134 | -10.900 | -6.192 | 1.00 | 42.34      |
| ANISOU   | 1321 | CG  | ASP | A | 103 | 6450   | 5265    | 4374   | 353  | -583 -502  |
| ATOM O   | 1322 | OD1 | ASP | A | 103 | 18.128 | -10.803 | -4.932 | 1.00 | 39.32      |
| ANISOU   | 1322 | OD1 | ASP | A | 103 | 5706   | 4990    | 4243   | 247  | -533 -437  |
| ATOM O1- | 1323 | OD2 | ASP | A | 103 | 18.146 | -11.997 | -6.795 | 1.00 | 44.64      |
| ANISOU   | 1323 | OD2 | ASP | A | 103 | 6852   | 5486    | 4624   | 310  | -632 -604  |
| ATOM H   | 1324 | H   | ASP | A | 103 | 19.331 | -8.996  | -4.709 | 1.00 | 0.00       |
| ATOM H   | 1325 | HA  | ASP | A | 103 | 18.172 | -7.490  | -6.948 | 1.00 | 0.00       |
| ATOM H   | 1326 | HB3 | ASP | A | 103 | 19.152 | -9.589  | -7.553 | 1.00 | 0.00       |
| ATOM H   | 1327 | HB2 | ASP | A | 103 | 17.468 | -9.675  | -7.824 | 1.00 | 0.00       |
| ATOM N   | 1328 | N   | THR | A | 104 | 16.407 | -7.615  | -4.494 | 1.00 | 34.66      |
| ANISOU   | 1328 | N   | THR | A | 104 | 5043   | 4608    | 3518   | 552  | -853 -361  |
| ATOM C   | 1329 | CA  | THR | A | 104 | 15.098 | -7.422  | -3.856 | 1.00 | 34.45      |
| ANISOU   | 1329 | CA  | THR | A | 104 | 4694   | 4723    | 3673   | 552  | -1094 -437 |
| ATOM C   | 1330 | C   | THR | A | 104 | 14.571 | -5.993  | -3.980 | 1.00 | 39.14      |
| ANISOU   | 1330 | C   | THR | A | 104 | 5354   | 5340    | 4177   | 732  | -1207 -405 |
| ATOM O   | 1331 | O   | THR | A | 104 | 15.353 | -5.044  | -4.091 | 1.00 | 36.52      |

|        |      |      |     |   |     |        |        |        |      |       |      |
|--------|------|------|-----|---|-----|--------|--------|--------|------|-------|------|
| ANISOU | 1331 | O    | THR | A | 104 | 5237   | 4939   | 3701   | 805  | -1011 | -281 |
| C      |      |      |     |   |     |        |        |        |      |       |      |
| ATOM   | 1332 | CB   | THR | A | 104 | 15.140 | -7.847 | -2.372 | 1.00 | 36.59 |      |
| ANISOU | 1332 | CB   | THR | A | 104 | 4599   | 5078   | 4227   | 361  | -929  | -396 |
| O      |      |      |     |   |     |        |        |        |      |       |      |
| ATOM   | 1333 | OG1  | THR | A | 104 | 15.932 | -6.909 | -1.634 | 1.00 | 33.42 |      |
| ANISOU | 1333 | OG1  | THR | A | 104 | 4208   | 4671   | 3819   | 364  | -712  | -257 |
| C      |      |      |     |   |     |        |        |        |      |       |      |
| ATOM   | 1334 | CG2  | THR | A | 104 | 15.640 | -9.286 | -2.164 | 1.00 | 33.53 |      |
| ANISOU | 1334 | CG2  | THR | A | 104 | 4154   | 4648   | 3939   | 195  | -829  | -418 |
| H      |      |      |     |   |     |        |        |        |      |       |      |
| ATOM   | 1335 | H    | THR | A | 104 | 17.212 | -7.319 | -3.962 | 1.00 | 0.00  |      |
| ATOM   | 1336 | HA   | THR | A | 104 | 14.389 | -8.076 | -4.363 | 1.00 | 0.00  |      |
| H      |      |      |     |   |     |        |        |        |      |       |      |
| ATOM   | 1337 | HB   | THR | A | 104 | 14.122 | -7.794 | -1.986 | 1.00 | 0.00  |      |
| H      |      |      |     |   |     |        |        |        |      |       |      |
| ATOM   | 1338 | HG1  | THR | A | 104 | 16.863 | -7.100 | -1.768 | 1.00 | 0.00  |      |
| H      |      |      |     |   |     |        |        |        |      |       |      |
| ATOM   | 1339 | HG21 | THR | A | 104 | 15.644 | -9.519 | -1.099 | 1.00 | 0.00  |      |
| H      |      |      |     |   |     |        |        |        |      |       |      |
| ATOM   | 1340 | HG22 | THR | A | 104 | 14.980 | -9.979 | -2.685 | 1.00 | 0.00  |      |
| H      |      |      |     |   |     |        |        |        |      |       |      |
| ATOM   | 1341 | HG23 | THR | A | 104 | 16.651 | -9.381 | -2.560 | 1.00 | 0.00  |      |
| N      |      |      |     |   |     |        |        |        |      |       |      |
| ATOM   | 1342 | N    | VAL | A | 105 | 13.236 | -5.843 | -3.903 | 1.00 | 38.76 |      |
| ANISOU | 1342 | N    | VAL | A | 105 | 5083   | 5367   | 4275   | 797  | -1509 | -530 |
| C      |      |      |     |   |     |        |        |        |      |       |      |
| ATOM   | 1343 | CA   | VAL | A | 105 | 12.538 | -4.553 | -3.961 | 1.00 | 39.94 |      |
| ANISOU | 1343 | CA   | VAL | A | 105 | 5231   | 5536   | 4410   | 981  | -1674 | -529 |
| C      |      |      |     |   |     |        |        |        |      |       |      |
| ATOM   | 1344 | C    | VAL | A | 105 | 13.032 | -3.619 | -2.834 | 1.00 | 40.98 |      |
| ANISOU | 1344 | C    | VAL | A | 105 | 5236   | 5714   | 4621   | 925  | -1369 | -381 |
| O      |      |      |     |   |     |        |        |        |      |       |      |
| ATOM   | 1345 | O    | VAL | A | 105 | 13.307 | -2.451 | -3.090 | 1.00 | 40.18 |      |
| ANISOU | 1345 | O    | VAL | A | 105 | 5351   | 5560   | 4356   | 1070 | -1324 | -290 |
| C      |      |      |     |   |     |        |        |        |      |       |      |
| ATOM   | 1346 | CB   | VAL | A | 105 | 10.997 | -4.769 | -3.944 | 1.00 | 46.75 |      |
| ANISOU | 1346 | CB   | VAL | A | 105 | 5748   | 6451   | 5563   | 1025 | -2040 | -734 |
| C      |      |      |     |   |     |        |        |        |      |       |      |
| ATOM   | 1347 | CG1  | VAL | A | 105 | 10.238 | -3.497 | -3.568 | 1.00 | 48.03 |      |
| ANISOU | 1347 | CG1  | VAL | A | 105 | 5776   | 6638   | 5834   | 1183 | -2158 | -738 |
| C      |      |      |     |   |     |        |        |        |      |       |      |
| ATOM   | 1348 | CG2  | VAL | A | 105 | 10.507 | -5.301 | -5.291 | 1.00 | 49.70 |      |
| ANISOU | 1348 | CG2  | VAL | A | 105 | 6331   | 6742   | 5811   | 1153 | -2450 | -905 |
| H      |      |      |     |   |     |        |        |        |      |       |      |
| ATOM   | 1349 | H    | VAL | A | 105 | 12.642 | -6.653 | -3.798 | 1.00 | 0.00  |      |
| ATOM   | 1350 | HA   | VAL | A | 105 | 12.793 | -4.084 | -4.911 | 1.00 | 0.00  |      |
| H      |      |      |     |   |     |        |        |        |      |       |      |
| ATOM   | 1351 | HB   | VAL | A | 105 | 10.776 | -5.523 | -3.189 | 1.00 | 0.00  |      |
| H      |      |      |     |   |     |        |        |        |      |       |      |
| ATOM   | 1352 | HG11 | VAL | A | 105 | 9.16   |        |        |      |       |      |

|           |      |      |     |   |     |        |        |        |      |       |      |
|-----------|------|------|-----|---|-----|--------|--------|--------|------|-------|------|
| ATOM<br>H | 1355 | HG21 | VAL | A | 105 | 9.427  | -5.444 | -5.255 | 1.00 | 0.00  |      |
| ATOM<br>H | 1356 | HG22 | VAL | A | 105 | 10.752 | -4.585 | -6.076 | 1.00 | 0.00  |      |
| ATOM<br>H | 1357 | HG23 | VAL | A | 105 | 10.992 | -6.254 | -5.504 | 1.00 | 0.00  |      |
| ATOM<br>N | 1358 | N    | TYR | A | 106 | 13.197 | -4.156 | -1.611 | 1.00 | 35.84 |      |
| ANISOU    | 1358 | N    | TYR | A | 106 | 4291   | 5132   | 4194   | 722  | -1160 | -358 |
| ATOM<br>C | 1359 | CA   | TYR | A | 106 | 13.620 | -3.380 | -0.443 | 1.00 | 34.02 |      |
| ANISOU    | 1359 | CA   | TYR | A | 106 | 3960   | 4932   | 4034   | 665  | -916  | -247 |
| ATOM<br>C | 1360 | C    | TYR | A | 106 | 15.037 | -2.841 | -0.559 | 1.00 | 36.30 |      |
| ANISOU    | 1360 | C    | TYR | A | 106 | 4505   | 5134   | 4155   | 676  | -697  | -111 |
| ATOM<br>O | 1361 | O    | TYR | A | 106 | 15.257 | -1.671 | -0.240 | 1.00 | 35.63 |      |
| ANISOU    | 1361 | O    | TYR | A | 106 | 4460   | 5031   | 4047   | 745  | -604  | -42  |
| ATOM<br>C | 1362 | CB   | TYR | A | 106 | 13.426 | -4.172 | 0.858  | 1.00 | 34.09 |      |
| ANISOU    | 1362 | CB   | TYR | A | 106 | 3697   | 4991   | 4265   | 468  | -768  | -263 |
| ATOM<br>C | 1363 | CG   | TYR | A | 106 | 12.054 | -4.795 | 0.970  | 1.00 | 37.00 |      |
| ANISOU    | 1363 | CG   | TYR | A | 106 | 3776   | 5395   | 4886   | 424  | -898  | -417 |
| ATOM<br>C | 1364 | CD1  | TYR | A | 106 | 10.915 | -4.006 | 1.089  | 1.00 | 40.59 |      |
| ANISOU    | 1364 | CD1  | TYR | A | 106 | 4027   | 5877   | 5519   | 519  | -997  | -501 |
| ATOM<br>C | 1365 | CD2  | TYR | A | 106 | 11.890 | -6.177 | 0.919  | 1.00 | 37.88 |      |
| ANISOU    | 1365 | CD2  | TYR | A | 106 | 3792   | 5488   | 5114   | 287  | -912  | -499 |
| ATOM<br>C | 1366 | CE1  | TYR | A | 106 | 9.643  | -4.573 | 1.152  | 1.00 | 43.73 |      |
| ANISOU    | 1366 | CE1  | TYR | A | 106 | 4094   | 6268   | 6253   | 474  | -1101 | -680 |
| ATOM<br>C | 1367 | CE2  | TYR | A | 106 | 10.624 | -6.756 | 0.988  | 1.00 | 40.85 |      |
| ANISOU    | 1367 | CE2  | TYR | A | 106 | 3863   | 5860   | 5800   | 231  | -1006 | -670 |
| ATOM<br>C | 1368 | CZ   | TYR | A | 106 | 9.504  | -5.950 | 1.107  | 1.00 | 49.10 |      |
| ANISOU    | 1368 | CZ   | TYR | A | 106 | 4669   | 6918   | 7068   | 322  | -1097 | -769 |
| ATOM<br>O | 1369 | OH   | TYR | A | 106 | 8.257  | -6.514 | 1.207  | 1.00 | 51.67 |      |
| ANISOU    | 1369 | OH   | TYR | A | 106 | 4628   | 7202   | 7803   | 257  | -1165 | -969 |
| ATOM<br>H | 1370 | H    | TYR | A | 106 | 13.027 | -5.141 | -1.465 | 1.00 | 0.00  |      |
| ATOM<br>H | 1371 | HA   | TYR | A | 106 | 12.959 | -2.515 | -0.385 | 1.00 | 0.00  |      |
| ATOM<br>H | 1372 | HB3  | TYR | A | 106 | 13.596 | -3.515 | 1.711  | 1.00 | 0.00  |      |
| ATOM<br>H | 1373 | HB2  | TYR | A | 106 | 14.184 | -4.952 | 0.923  | 1.00 | 0.00  |      |
| ATOM<br>H | 1374 | HD1  | TYR | A | 106 | 11.005 | -2.931 | 1.134  | 1.00 | 0.00  |      |
| ATOM<br>H | 1375 | HD2  | TYR | A | 106 | 12.753 | -6.820 | 0.824  | 1.00 | 0.00  |      |
| ATOM<br>H | 1376 | HE1  | TYR | A | 106 | 8.773  | -3.939 | 1.235  | 1.00 | 0.00  |      |

|        |      |     |     |   |     |        |        |        |      |       |     |
|--------|------|-----|-----|---|-----|--------|--------|--------|------|-------|-----|
| ATOM H | 1377 | HE2 | TYR | A | 106 | 10.519 | -7.830 | 0.949  | 1.00 | 0.00  |     |
| ATOM H | 1378 | HH  | TYR | A | 106 | 8.343  | -7.449 | 1.407  | 1.00 | 0.00  |     |
| ATOM N | 1379 | N   | TYR | A | 107 | 15.994 | -3.676 | -1.020 | 1.00 | 31.14 |     |
| ANISOU | 1379 | N   | TYR | A | 107 | 4000   | 4402   | 3431   | 607  | -598  | -91 |
| ATOM C | 1380 | CA  | TYR | A | 107 | 17.387 | -3.250 | -1.201 | 1.00 | 29.19 |     |
| ANISOU | 1380 | CA  | TYR | A | 107 | 3944   | 4024   | 3124   | 605  | -355  | 3   |
| ATOM C | 1381 | C   | TYR | A | 107 | 17.452 | -2.153 | -2.285 | 1.00 | 33.55 |     |
| ANISOU | 1381 | C   | TYR | A | 107 | 4822   | 4467   | 3460   | 789  | -328  | 44  |
| ATOM O | 1382 | O   | TYR | A | 107 | 18.067 | -1.114 | -2.062 | 1.00 | 32.15 |     |
| ANISOU | 1382 | O   | TYR | A | 107 | 4707   | 4210   | 3300   | 822  | -143  | 118 |
| ATOM C | 1383 | CB  | TYR | A | 107 | 18.269 | -4.449 | -1.593 | 1.00 | 29.40 |     |
| ANISOU | 1383 | CB  | TYR | A | 107 | 4040   | 3962   | 3169   | 504  | -251  | -13 |
| ATOM C | 1384 | CG  | TYR | A | 107 | 19.743 | -4.140 | -1.764 | 1.00 | 29.99 |     |
| ANISOU | 1384 | CG  | TYR | A | 107 | 4237   | 3861   | 3298   | 484  | 32    | 47  |
| ATOM C | 1385 | CD1 | TYR | A | 107 | 20.208 | -3.452 | -2.883 | 1.00 | 32.99 |     |
| ANISOU | 1385 | CD1 | TYR | A | 107 | 4944   | 4076   | 3516   | 597  | 202   | 78  |
| ATOM C | 1386 | CD2 | TYR | A | 107 | 20.684 | -4.617 | -0.856 | 1.00 | 29.03 |     |
| ANISOU | 1386 | CD2 | TYR | A | 107 | 3920   | 3695   | 3413   | 358  | 133   | 56  |
| ATOM C | 1387 | CE1 | TYR | A | 107 | 21.569 | -3.199 | -3.065 | 1.00 | 34.43 |     |
| ANISOU | 1387 | CE1 | TYR | A | 107 | 5199   | 4049   | 3834   | 561  | 531   | 108 |
| ATOM C | 1388 | CE2 | TYR | A | 107 | 22.048 | -4.391 | -1.040 | 1.00 | 29.33 |     |
| ANISOU | 1388 | CE2 | TYR | A | 107 | 3997   | 3538   | 3610   | 338  | 377   | 69  |
| ATOM C | 1389 | CZ  | TYR | A | 107 | 22.484 | -3.667 | -2.137 | 1.00 | 37.40 |     |
| ANISOU | 1389 | CZ  | TYR | A | 107 | 5288   | 4392   | 4531   | 426  | 608   | 90  |
| ATOM O | 1390 | OH  | TYR | A | 107 | 23.828 | -3.455 | -2.331 | 1.00 | 39.08 |     |
| ANISOU | 1390 | OH  | TYR | A | 107 | 5501   | 4367   | 4980   | 390  | 916   | 81  |
| ATOM H | 1391 | H   | TYR | A | 107 | 15.761 | -4.631 | -1.254 | 1.00 | 0.00  |     |
| ATOM H | 1392 | HA  | TYR | A | 107 | 17.753 | -2.837 | -0.261 | 1.00 | 0.00  |     |
| ATOM H | 1393 | HB3 | TYR | A | 107 | 17.885 | -4.894 | -2.511 | 1.00 | 0.00  |     |
| ATOM H | 1394 | HB2 | TYR | A | 107 | 18.150 | -5.241 | -0.853 | 1.00 | 0.00  |     |
| ATOM H | 1395 | HD1 | TYR | A | 107 | 19.511 | -3.103 | -3.631 | 1.00 | 0.00  |     |
| ATOM H | 1396 | HD2 | TYR | A | 107 | 20.363 | -5.174 | 0.012  | 1.00 | 0.00  |     |
| ATOM H | 1397 | HE1 | TYR | A | 107 | 21.904 | -2.641 | -3.927 | 1.00 | 0.00  |     |
| ATOM H | 1398 | HE2 | TYR | A | 107 | 22.761 | -4.780 | -0.328 | 1.00 | 0.00  |     |

|             |      |     |     |   |     |        |        |         |      |       |      |
|-------------|------|-----|-----|---|-----|--------|--------|---------|------|-------|------|
| ATOM<br>H   | 1399 | HH  | TYR | A | 107 | 24.321 | -3.839 | -1.603  | 1.00 | 0.00  |      |
| ATOM<br>N   | 1400 | N   | LYS | A | 108 | 16.825 | -2.398 | -3.453  | 1.00 | 33.16 |      |
| ANISOU      | 1400 | N   | LYS | A | 108 | 5015   | 4385   | 3199    | 917  | -520  | -12  |
| ATOM<br>C   | 1401 | CA  | LYS | A | 108 | 16.812 | -1.456 | -4.576  | 1.00 | 35.05 |      |
| ANISOU      | 1401 | CA  | LYS | A | 108 | 5684   | 4482   | 3153    | 1126 | -526  | 31   |
| ATOM<br>C   | 1402 | C   | LYS | A | 108 | 16.199 | -0.115 | -4.179  | 1.00 | 39.89 |      |
| ANISOU      | 1402 | C   | LYS | A | 108 | 6240   | 5135   | 3783    | 1252 | -605  | 73   |
| ATOM<br>O   | 1403 | O   | LYS | A | 108 | 16.771 | 0.929  | -4.497  | 1.00 | 39.29 |      |
| ANISOU      | 1403 | O   | LYS | A | 108 | 6428   | 4912   | 3588    | 1345 | -396  | 169  |
| ATOM<br>C   | 1404 | CB  | LYS | A | 108 | 16.089 | -2.051 | -5.789  | 1.00 | 39.73 |      |
| ANISOU      | 1404 | CB  | LYS | A | 108 | 6561   | 5035   | 3498    | 1262 | -832  | -67  |
| ATOM<br>C   | 1405 | CG  | LYS | A | 108 | 16.830 | -3.222 | -6.434  | 1.00 | 43.69 |      |
| ANISOU      | 1405 | CG  | LYS | A | 108 | 7267   | 5431   | 3902    | 1176 | -692  | -97  |
| ATOM<br>C   | 1406 | CD  | LYS | A | 108 | 16.033 | -3.775 | -7.590  | 1.00 | 47.74 |      |
| ANISOU      | 1406 | CD  | LYS | A | 108 | 8090   | 5897   | 4151    | 1323 | -1050 | -219 |
| ATOM<br>C   | 1407 | CE  | LYS | A | 108 | 16.638 | -5.029 | -8.147  | 1.00 | 53.52 |      |
| ANISOU      | 1407 | CE  | LYS | A | 108 | 8993   | 6537   | 4807    | 1224 | -929  | -274 |
| ATOM<br>N1+ | 1408 | NZ  | LYS | A | 108 | 15.804 | -5.578 | -9.251  | 1.00 | 63.44 |      |
| ANISOU      | 1408 | NZ  | LYS | A | 108 | 10574  | 7735   | 5795    | 1376 | -1333 | -421 |
| ATOM<br>H   | 1409 | H   | LYS | A | 108 | 16.331 | -3.268 | -3.588  | 1.00 | 0.00  |      |
| ATOM<br>H   | 1410 | HA  | LYS | A | 108 | 17.847 | -1.273 | -4.865  | 1.00 | 0.00  |      |
| ATOM<br>H   | 1411 | HB3 | LYS | A | 108 | 15.929 | -1.271 | -6.533  | 1.00 | 0.00  |      |
| ATOM<br>H   | 1412 | HB2 | LYS | A | 108 | 15.091 | -2.374 | -5.493  | 1.00 | 0.00  |      |
| ATOM<br>H   | 1413 | HG3 | LYS | A | 108 | 16.986 | -4.006 | -5.693  | 1.00 | 0.00  |      |
| ATOM<br>H   | 1414 | HG2 | LYS | A | 108 | 17.802 | -2.883 | -6.792  | 1.00 | 0.00  |      |
| ATOM<br>H   | 1415 | HD3 | LYS | A | 108 | 15.967 | -3.024 | -8.377  | 1.00 | 0.00  |      |
| ATOM<br>H   | 1416 | HD2 | LYS | A | 108 | 15.013 | -3.979 | -7.263  | 1.00 | 0.00  |      |
| ATOM<br>H   | 1417 | HE3 | LYS | A | 108 | 16.726 | -5.772 | -7.355  | 1.00 | 0.00  |      |
| ATOM<br>H   | 1418 | HE2 | LYS | A | 108 | 17.639 | -4.814 | -8.521  | 1.00 | 0.00  |      |
| ATOM<br>H   | 1419 | HZ1 | LYS | A | 108 | 15.946 | -6.576 | -9.317  | 1.00 | 0.00  |      |
| ATOM<br>H   | 1420 | HZ2 | LYS | A | 108 | 14.830 | -5.389 | -9.064  | 1.00 | 0.00  |      |
| ATOM<br>H   | 1421 | HZ3 | LYS | A | 108 | 16.069 | -5.142 | -10.123 | 1.00 | 0.00  |      |
| ATOM<br>N   | 1422 | N   | LEU | A | 109 | 15.064 | -0.142 | -3.454  | 1.00 | 37.78 |      |

|        |      |      |     |   |     |        |        |        |      |       |      |
|--------|------|------|-----|---|-----|--------|--------|--------|------|-------|------|
| ANISOU | 1422 | N    | LEU | A | 109 | 5617   | 5037   | 3701   | 1245 | -855  | -5   |
| ATOM   | 1423 | CA   | LEU | A | 109 | 14.399 | 1.084  | -2.998 | 1.00 | 38.77 |      |
| C      |      |      |     |   |     |        |        |        |      |       |      |
| ANISOU | 1423 | CA   | LEU | A | 109 | 5637   | 5199   | 3894   | 1361 | -928  | 15   |
| ATOM   | 1424 | C    | LEU | A | 109 | 15.255 | 1.831  | -1.960 | 1.00 | 40.23 |      |
| C      |      |      |     |   |     |        |        |        |      |       |      |
| ANISOU | 1424 | C    | LEU | A | 109 | 5707   | 5373   | 4205   | 1253 | -602  | 114  |
| ATOM   | 1425 | O    | LEU | A | 109 | 15.374 | 3.050  | -2.055 | 1.00 | 41.39 |      |
| O      |      |      |     |   |     |        |        |        |      |       |      |
| ANISOU | 1425 | O    | LEU | A | 109 | 6000   | 5438   | 4287   | 1372 | -522  | 181  |
| ATOM   | 1426 | CB   | LEU | A | 109 | 12.976 | 0.795  | -2.472 | 1.00 | 39.97 |      |
| C      |      |      |     |   |     |        |        |        |      |       |      |
| ANISOU | 1426 | CB   | LEU | A | 109 | 5396   | 5499   | 4292   | 1360 | -1215 | -120 |
| ATOM   | 1427 | CG   | LEU | A | 109 | 12.116 | 2.011  | -2.050 | 1.00 | 46.00 |      |
| C      |      |      |     |   |     |        |        |        |      |       |      |
| ANISOU | 1427 | CG   | LEU | A | 109 | 6026   | 6284   | 5170   | 1509 | -1332 | -136 |
| ATOM   | 1428 | CD1  | LEU | A | 109 | 11.880 | 2.969  | -3.214 | 1.00 | 49.04 |      |
| C      |      |      |     |   |     |        |        |        |      |       |      |
| ANISOU | 1428 | CD1  | LEU | A | 109 | 6797   | 6538   | 5299   | 1800 | -1576 | -119 |
| ATOM   | 1429 | CD2  | LEU | A | 109 | 10.791 | 1.564  | -1.486 | 1.00 | 50.61 |      |
| C      |      |      |     |   |     |        |        |        |      |       |      |
| ANISOU | 1429 | CD2  | LEU | A | 109 | 6154   | 6976   | 6100   | 1461 | -1516 | -294 |
| ATOM   | 1430 | H    | LEU | A | 109 | 14.643 | -1.026 | -3.207 | 1.00 | 0.00  |      |
| H      |      |      |     |   |     |        |        |        |      |       |      |
| ATOM   | 1431 | HA   | LEU | A | 109 | 14.297 | 1.738  | -3.864 | 1.00 | 0.00  |      |
| H      |      |      |     |   |     |        |        |        |      |       |      |
| ATOM   | 1432 | HB3  | LEU | A | 109 | 13.037 | 0.094  | -1.640 | 1.00 | 0.00  |      |
| H      |      |      |     |   |     |        |        |        |      |       |      |
| ATOM   | 1433 | HB2  | LEU | A | 109 | 12.431 | 0.212  | -3.214 | 1.00 | 0.00  |      |
| H      |      |      |     |   |     |        |        |        |      |       |      |
| ATOM   | 1434 | HG   | LEU | A | 109 | 12.652 | 2.551  | -1.270 | 1.00 | 0.00  |      |
| H      |      |      |     |   |     |        |        |        |      |       |      |
| ATOM   | 1435 | HD11 | LEU | A | 109 | 11.273 | 3.809  | -2.877 | 1.00 | 0.00  |      |
| H      |      |      |     |   |     |        |        |        |      |       |      |
| ATOM   | 1436 | HD12 | LEU | A | 109 | 12.838 | 3.338  | -3.581 | 1.00 | 0.00  |      |
| H      |      |      |     |   |     |        |        |        |      |       |      |
| ATOM   | 1437 | HD13 | LEU | A | 109 | 11.361 | 2.445  | -4.017 | 1.00 | 0.00  |      |
| H      |      |      |     |   |     |        |        |        |      |       |      |
| ATOM   | 1438 | HD21 | LEU | A | 109 | 10.206 | 2.437  | -1.197 | 1.00 | 0.00  |      |
| H      |      |      |     |   |     |        |        |        |      |       |      |
| ATOM   | 1439 | HD22 | LEU | A | 109 | 10.247 | 0.996  | -2.241 | 1.00 | 0.00  |      |
| H      |      |      |     |   |     |        |        |        |      |       |      |
| ATOM   | 1440 | HD23 | LEU | A | 109 | 10.961 | 0.936  | -0.612 | 1.00 | 0.00  |      |
| H      |      |      |     |   |     |        |        |        |      |       |      |
| ATOM   | 1441 | N    | ALA | A | 110 | 15.902 | 1.105  | -1.022 | 1.00 | 34.46 |      |
| N      |      |      |     |   |     |        |        |        |      |       |      |
| ANISOU | 1441 | N    | ALA | A | 110 | 4755   | 4694   | 3645   | 1043 | -438  | 115  |
| ATOM   | 1442 | CA   | ALA | A | 110 | 16.785 | 1.716  | -0.019 | 1.00 | 32.00 |      |
| C      |      |      |     |   |     |        |        |        |      |       |      |
| ANISOU | 1442 | CA   | ALA | A | 110 | 4346   | 4347   | 3464   | 947  | -203  | 174  |
| ATOM   | 1443 | C    | ALA | A | 110 | 17.978 | 2.424  | -0.675 | 1.00 | 36.34 |      |
| C      |      |      |     |   |     |        |        |        |      |       |      |
| ANISOU | 1443 | C    | ALA | A | 110 | 5165   | 4696   | 3946   | 990  | 46    | 248  |
| ATOM   | 1444 | O    | ALA | A | 110 | 18.338 | 3.530  | -0.258 | 1.00 | 34.69 |      |
| O      |      |      |     |   |     |        |        |        |      |       |      |
| ANISOU | 1444 | O    | ALA | A | 110 | 4956   | 4419   | 3805   | 1014 | 181   | 287  |

|          |      |     |     |   |     |        |        |        |      |       |     |
|----------|------|-----|-----|---|-----|--------|--------|--------|------|-------|-----|
| ATOM C   | 1445 | CB  | ALA | A | 110 | 17.282 | 0.670  | 0.962  | 1.00 | 30.67 |     |
| ANISOU   | 1445 | CB  | ALA | A | 110 | 3966   | 4233   | 3455   | 752  | -150  | 148 |
| ATOM H   | 1446 | H   | ALA | A | 110 | 15.788 | 0.102  | -0.992 | 1.00 | 0.00  |     |
| ATOM H   | 1447 | HA  | ALA | A | 110 | 16.210 | 2.458  | 0.535  | 1.00 | 0.00  |     |
| ATOM H   | 1448 | HB1 | ALA | A | 110 | 17.934 | 1.141  | 1.697  | 1.00 | 0.00  |     |
| ATOM H   | 1449 | HB2 | ALA | A | 110 | 16.432 | 0.215  | 1.470  | 1.00 | 0.00  |     |
| ATOM H   | 1450 | HB3 | ALA | A | 110 | 17.837 | -0.099 | 0.424  | 1.00 | 0.00  |     |
| ATOM N   | 1451 | N   | LYS | A | 111 | 18.571 | 1.805  | -1.709 | 1.00 | 35.37 |     |
| ANISOU   | 1451 | N   | LYS | A | 111 | 5280   | 4452   | 3708   | 996  | 140   | 257 |
| ATOM C   | 1452 | CA  | LYS | A | 111 | 19.700 | 2.396  | -2.434 | 1.00 | 37.41 |     |
| ANISOU   | 1452 | CA  | LYS | A | 111 | 5823   | 4463   | 3930   | 1026 | 467   | 316 |
| ATOM C   | 1453 | C   | LYS | A | 111 | 19.256 | 3.662  | -3.188 | 1.00 | 44.66 |     |
| ANISOU   | 1453 | C   | LYS | A | 111 | 7080   | 5268   | 4621   | 1233 | 490   | 384 |
| ATOM O   | 1454 | O   | LYS | A | 111 | 19.981 | 4.660  | -3.179 | 1.00 | 45.34 |     |
| ANISOU   | 1454 | O   | LYS | A | 111 | 7276   | 5174   | 4776   | 1246 | 775   | 438 |
| ATOM C   | 1455 | CB  | LYS | A | 111 | 20.345 | 1.360  | -3.373 | 1.00 | 40.89 |     |
| ANISOU   | 1455 | CB  | LYS | A | 111 | 6474   | 4781   | 4283   | 990  | 593   | 298 |
| ATOM C   | 1456 | CG  | LYS | A | 111 | 21.690 | 1.787  | -3.951 | 1.00 | 52.13 |     |
| ANISOU   | 1456 | CG  | LYS | A | 111 | 8074   | 5913   | 5821   | 948  | 1040  | 330 |
| ATOM C   | 1457 | CD  | LYS | A | 111 | 22.401 | 0.605  | -4.595 | 1.00 | 61.71 |     |
| ANISOU   | 1457 | CD  | LYS | A | 111 | 9367   | 7018   | 7061   | 864  | 1191  | 286 |
| ATOM C   | 1458 | CE  | LYS | A | 111 | 23.544 | 1.018  | -5.492 | 1.00 | 76.92 |     |
| ANISOU   | 1458 | CE  | LYS | A | 111 | 11681  | 8597   | 8947   | 900  | 1668  | 319 |
| ATOM N1+ | 1459 | NZ  | LYS | A | 111 | 24.763 | 1.376  | -4.719 | 1.00 | 86.35 |     |
| ANISOU   | 1459 | NZ  | LYS | A | 111 | 12621  | 9594   | 10594  | 777  | 2025  | 295 |
| ATOM H   | 1460 | H   | LYS | A | 111 | 18.241 | 0.900  | -2.012 | 1.00 | 0.00  |     |
| ATOM H   | 1461 | HA  | LYS | A | 111 | 20.449 | 2.692  | -1.700 | 1.00 | 0.00  |     |
| ATOM H   | 1462 | HB3 | LYS | A | 111 | 19.657 | 1.134  | -4.188 | 1.00 | 0.00  |     |
| ATOM H   | 1463 | HB2 | LYS | A | 111 | 20.464 | 0.416  | -2.842 | 1.00 | 0.00  |     |
| ATOM H   | 1464 | HG3 | LYS | A | 111 | 22.313 | 2.196  | -3.156 | 1.00 | 0.00  |     |
| ATOM H   | 1465 | HG2 | LYS | A | 111 | 21.534 | 2.567  | -4.697 | 1.00 | 0.00  |     |
| ATOM H   | 1466 | HD3 | LYS | A | 111 | 21.683 | 0.020  | -5.170 | 1.00 | 0.00  |     |
| ATOM H   | 1467 | HD2 | LYS | A | 111 | 22.774 | -0.061 | -3.817 | 1.00 | 0.00  |     |

|          |      |     |     |   |     |        |       |        |      |        |     |
|----------|------|-----|-----|---|-----|--------|-------|--------|------|--------|-----|
| ATOM H   | 1468 | HE3 | LYS | A | 111 | 23.238 | 1.869 | -6.101 | 1.00 | 0.00   |     |
| ATOM H   | 1469 | HE2 | LYS | A | 111 | 23.777 | 0.205 | -6.180 | 1.00 | 0.00   |     |
| ATOM H   | 1470 | HZ1 | LYS | A | 111 | 24.974 | 0.639 | -4.062 | 1.00 | 0.00   |     |
| ATOM H   | 1471 | HZ2 | LYS | A | 111 | 25.541 | 1.495 | -5.352 | 1.00 | 0.00   |     |
| ATOM H   | 1472 | HZ3 | LYS | A | 111 | 24.603 | 2.238 | -4.217 | 1.00 | 0.00   |     |
| ATOM N   | 1473 | N   | LYS | A | 112 | 18.042 | 3.634 | -3.778 | 1.00 | 43.39  |     |
| ANISOU   | 1473 | N   | LYS | A | 112 | 7067   | 5195  | 4224   | 1400 | 167    | 366 |
| ATOM C   | 1474 | CA  | LYS | A | 112 | 17.447 | 4.762 | -4.499 | 1.00 | 46.33  |     |
| ANISOU   | 1474 | CA  | LYS | A | 112 | 7790   | 5457  | 4355   | 1641 | 86     | 424 |
| ATOM C   | 1475 | C   | LYS | A | 112 | 17.170 | 5.913 | -3.533 | 1.00 | 50.86  |     |
| ANISOU   | 1475 | C   | LYS | A | 112 | 8123   | 6094  | 5108   | 1658 | 92     | 447 |
| ATOM O   | 1476 | O   | LYS | A | 112 | 17.561 | 7.049 | -3.814 | 1.00 | 52.34  |     |
| ANISOU   | 1476 | O   | LYS | A | 112 | 8571   | 6099  | 5215   | 1766 | 286    | 530 |
| ATOM C   | 1477 | CB  | LYS | A | 112 | 16.148 | 4.324 | -5.202 | 1.00 | 51.17  |     |
| ANISOU   | 1477 | CB  | LYS | A | 112 | 8544   | 6151  | 4749   | 1823 | -369   | 353 |
| ATOM C   | 1478 | CG  | LYS | A | 112 | 15.608 | 5.324 | -6.226 | 1.00 | 67.58  |     |
| ANISOU   | 1478 | CG  | LYS | A | 112 | 11088  | 8067  | 6522   | 2124 | -526   | 408 |
| ATOM C   | 1479 | CD  | LYS | A | 112 | 14.091 | 5.231 | -6.386 | 0.00 | 79.43  |     |
| ANISOU   | 1479 | CD  | LYS | A | 112 | 12433  | 9710  | 8037   | 2297 | -1088  | 291 |
| ATOM C   | 1480 | CE  | LYS | A | 112 | 13.648 | 4.205 | -7.404 | 0.00 | 93.23  |     |
| ANISOU   | 1480 | CE  | LYS | A | 112 | 14522  | 11395 | 9505   | 2443 | -1441  | 203 |
| ATOM N1+ | 1481 | NZ  | LYS | A | 112 | 12.167 | 4.083 | -7.445 | 0.00 | 103.12 |     |
| ANISOU   | 1481 | NZ  | LYS | A | 112 | 15369  | 12826 | 10984  | 2497 | -1972  | 20  |
| ATOM H   | 1482 | H   | LYS | A | 112 | 17.481 | 2.795 | -3.739 | 1.00 | 0.00   |     |
| ATOM H   | 1483 | HA  | LYS | A | 112 | 18.154 | 5.104 | -5.255 | 1.00 | 0.00   |     |
| ATOM H   | 1484 | HB3 | LYS | A | 112 | 15.382 | 4.125 | -4.453 | 1.00 | 0.00   |     |
| ATOM H   | 1485 | HB2 | LYS | A | 112 | 16.307 | 3.361 | -5.687 | 1.00 | 0.00   |     |
| ATOM H   | 1486 | HG3 | LYS | A | 112 | 16.085 | 5.149 | -7.190 | 1.00 | 0.00   |     |
| ATOM H   | 1487 | HG2 | LYS | A | 112 | 15.879 | 6.335 | -5.923 | 1.00 | 0.00   |     |
| ATOM H   | 1488 | HD3 | LYS | A | 112 | 13.696 | 6.209 | -6.662 | 1.00 | 0.00   |     |
| ATOM H   | 1489 | HD2 | LYS | A | 112 | 13.639 | 5.001 | -5.421 | 1.00 | 0.00   |     |
| ATOM H   | 1490 | HE3 | LYS | A | 112 | 14.085 | 3.237 | -7.158 | 1.00 | 0.00   |     |
| ATOM H   | 1491 | HE2 | LYS | A | 112 | 14.016 | 4.490 | -8.390 | 1.00 | 0.00   |     |

|           |      |      |     |   |     |        |       |        |      |          |
|-----------|------|------|-----|---|-----|--------|-------|--------|------|----------|
| ATOM<br>H | 1492 | HZ1  | LYS | A | 112 | 11.762 | 4.974 | -7.693 | 1.00 | 0.00     |
| ATOM<br>H | 1493 | HZ2  | LYS | A | 112 | 11.905 | 3.392 | -8.133 | 1.00 | 0.00     |
| ATOM<br>H | 1494 | HZ3  | LYS | A | 112 | 11.827 | 3.800 | -6.537 | 1.00 | 0.00     |
| ATOM<br>N | 1495 | N    | ILE | A | 113 | 16.496 | 5.611 | -2.399 | 1.00 | 46.00    |
| ANISOU    | 1495 | N    | ILE | A | 113 | 7046   | 5707  | 4726   | 1553 | -89 372  |
| ATOM<br>C | 1496 | CA   | ILE | A | 113 | 16.134 | 6.563 | -1.350 | 1.00 | 45.14    |
| ANISOU    | 1496 | CA   | ILE | A | 113 | 6697   | 5664  | 4790   | 1555 | -80 372  |
| ATOM<br>C | 1497 | C    | ILE | A | 113 | 17.403 | 7.213 | -0.759 | 1.00 | 45.92    |
| ANISOU    | 1497 | C    | ILE | A | 113 | 6780   | 5632  | 5034   | 1433 | 269 419  |
| ATOM<br>O | 1498 | O    | ILE | A | 113 | 17.439 | 8.439 | -0.640 | 1.00 | 45.66    |
| ANISOU    | 1498 | O    | ILE | A | 113 | 6830   | 5501  | 5019   | 1517 | 378 462  |
| ATOM<br>C | 1499 | CB   | ILE | A | 113 | 15.184 | 5.885 | -0.308 | 1.00 | 47.70    |
| ANISOU    | 1499 | CB   | ILE | A | 113 | 6596   | 6217  | 5312   | 1461 | -287 272 |
| ATOM<br>C | 1500 | CG1  | ILE | A | 113 | 13.745 | 5.768 | -0.870 | 1.00 | 50.61    |
| ANISOU    | 1500 | CG1  | ILE | A | 113 | 6932   | 6653  | 5644   | 1637 | -643 195 |
| ATOM<br>C | 1501 | CG2  | ILE | A | 113 | 15.170 | 6.583 | 1.035  | 1.00 | 47.16    |
| ANISOU    | 1501 | CG2  | ILE | A | 113 | 6289   | 6197  | 5432   | 1385 | -167 264 |
| ATOM<br>C | 1502 | CD1  | ILE | A | 113 | 12.738 | 4.987 | 0.033  | 1.00 | 58.58    |
| ANISOU    | 1502 | CD1  | ILE | A | 113 | 7508   | 7838  | 6913   | 1531 | -794 69  |
| ATOM<br>H | 1503 | H    | ILE | A | 113 | 16.201 | 4.661 | -2.225 | 1.00 | 0.00     |
| ATOM<br>H | 1504 | HA   | ILE | A | 113 | 15.563 | 7.359 | -1.828 | 1.00 | 0.00     |
| ATOM<br>H | 1505 | HB   | ILE | A | 113 | 15.552 | 4.872 | -0.144 | 1.00 | 0.00     |
| ATOM<br>H | 1506 | HG13 | ILE | A | 113 | 13.780 | 5.304 | -1.856 | 1.00 | 0.00     |
| ATOM<br>H | 1507 | HG12 | ILE | A | 113 | 13.353 | 6.766 | -1.067 | 1.00 | 0.00     |
| ATOM<br>H | 1508 | HG21 | ILE | A | 113 | 14.491 | 6.061 | 1.709  | 1.00 | 0.00     |
| ATOM<br>H | 1509 | HG22 | ILE | A | 113 | 16.175 | 6.579 | 1.457  | 1.00 | 0.00     |
| ATOM<br>H | 1510 | HG23 | ILE | A | 113 | 14.834 | 7.612 | 0.907  | 1.00 | 0.00     |
| ATOM<br>H | 1511 | HD11 | ILE | A | 113 | 11.761 | 4.962 | -0.449 | 1.00 | 0.00     |
| ATOM<br>H | 1512 | HD12 | ILE | A | 113 | 13.096 | 3.968 | 0.181  | 1.00 | 0.00     |
| ATOM<br>H | 1513 | HD13 | ILE | A | 113 | 12.653 | 5.485 | 0.999  | 1.00 | 0.00     |
| ATOM<br>N | 1514 | N    | LEU | A | 114 | 18.461 | 6.407 | -0.481 | 1.00 | 39.95    |
| ANISOU    | 1514 | N    | LEU | A | 114 | 5924   | 4845  | 4412   | 1249 | 429 397  |
| ATOM<br>C | 1515 | CA   | LEU | A | 114 | 19.746 | 6.888 | 0.050  | 1.00 | 38.81    |

|        |      |      |     |   |     |        |        |        |      |       |     |
|--------|------|------|-----|---|-----|--------|--------|--------|------|-------|-----|
| ANISOU | 1515 | CA   | LEU | A | 114 | 5706   | 4545   | 4494   | 1128 | 708   | 395 |
| ATOM   | 1516 | C    | LEU | A | 114 | 20.386 | 7.925  | -0.879 | 1.00 | 46.26 |     |
| C      |      |      |     |   |     |        |        |        |      |       |     |
| ANISOU | 1516 | C    | LEU | A | 114 | 6980   | 5209   | 5386   | 1221 | 1017  | 465 |
| ATOM   | 1517 | O    | LEU | A | 114 | 20.796 | 8.996  | -0.416 | 1.00 | 45.22 |     |
| O      |      |      |     |   |     |        |        |        |      |       |     |
| ANISOU | 1517 | O    | LEU | A | 114 | 6804   | 4959   | 5419   | 1208 | 1181  | 465 |
| ATOM   | 1518 | CB   | LEU | A | 114 | 20.732 | 5.725  | 0.323  | 1.00 | 37.53 |     |
| C      |      |      |     |   |     |        |        |        |      |       |     |
| ANISOU | 1518 | CB   | LEU | A | 114 | 5379   | 4367   | 4512   | 949  | 767   | 339 |
| ATOM   | 1519 | CG   | LEU | A | 114 | 22.094 | 6.107  | 0.939  | 1.00 | 42.01 |     |
| C      |      |      |     |   |     |        |        |        |      |       |     |
| ANISOU | 1519 | CG   | LEU | A | 114 | 5788   | 4758   | 5415   | 824  | 971   | 286 |
| ATOM   | 1520 | CD1  | LEU | A | 114 | 21.940 | 6.658  | 2.359  | 1.00 | 41.14 |     |
| C      |      |      |     |   |     |        |        |        |      |       |     |
| ANISOU | 1520 | CD1  | LEU | A | 114 | 5448   | 4745   | 5437   | 780  | 818   | 232 |
| ATOM   | 1521 | CD2  | LEU | A | 114 | 23.047 | 4.911  | 0.954  | 1.00 | 43.92 |     |
| C      |      |      |     |   |     |        |        |        |      |       |     |
| ANISOU | 1521 | CD2  | LEU | A | 114 | 5898   | 4941   | 5847   | 693  | 1011  | 228 |
| ATOM   | 1522 | H    | LEU | A | 114 | 18.392 | 5.412  | -0.638 | 1.00 | 0.00  |     |
| H      |      |      |     |   |     |        |        |        |      |       |     |
| ATOM   | 1523 | HA   | LEU | A | 114 | 19.545 | 7.379  | 1.002  | 1.00 | 0.00  |     |
| H      |      |      |     |   |     |        |        |        |      |       |     |
| ATOM   | 1524 | HB3  | LEU | A | 114 | 20.899 | 5.171  | -0.601 | 1.00 | 0.00  |     |
| H      |      |      |     |   |     |        |        |        |      |       |     |
| ATOM   | 1525 | HB2  | LEU | A | 114 | 20.246 | 4.984  | 0.958  | 1.00 | 0.00  |     |
| H      |      |      |     |   |     |        |        |        |      |       |     |
| ATOM   | 1526 | HG   | LEU | A | 114 | 22.539 | 6.886  | 0.320  | 1.00 | 0.00  |     |
| H      |      |      |     |   |     |        |        |        |      |       |     |
| ATOM   | 1527 | HD11 | LEU | A | 114 | 22.921 | 6.915  | 2.758  | 1.00 | 0.00  |     |
| H      |      |      |     |   |     |        |        |        |      |       |     |
| ATOM   | 1528 | HD12 | LEU | A | 114 | 21.312 | 7.549  | 2.338  | 1.00 | 0.00  |     |
| H      |      |      |     |   |     |        |        |        |      |       |     |
| ATOM   | 1529 | HD13 | LEU | A | 114 | 21.477 | 5.903  | 2.994  | 1.00 | 0.00  |     |
| H      |      |      |     |   |     |        |        |        |      |       |     |
| ATOM   | 1530 | HD21 | LEU | A | 114 | 23.999 | 5.210  | 1.393  | 1.00 | 0.00  |     |
| H      |      |      |     |   |     |        |        |        |      |       |     |
| ATOM   | 1531 | HD22 | LEU | A | 114 | 22.611 | 4.106  | 1.545  | 1.00 | 0.00  |     |
| H      |      |      |     |   |     |        |        |        |      |       |     |
| ATOM   | 1532 | HD23 | LEU | A | 114 | 23.211 | 4.564  | -0.066 | 1.00 | 0.00  |     |
| H      |      |      |     |   |     |        |        |        |      |       |     |
| ATOM   | 1533 | N    | HIS | A | 115 | 20.428 | 7.618  | -2.187 | 1.00 | 46.62 |     |
| N      |      |      |     |   |     |        |        |        |      |       |     |
| ANISOU | 1533 | N    | HIS | A | 115 | 7397   | 5124   | 5192   | 1319 | 1111  | 520 |
| ATOM   | 1534 | CA   | HIS | A | 115 | 20.985 | 8.507  | -3.204 | 1.00 | 50.79 |     |
| C      |      |      |     |   |     |        |        |        |      |       |     |
| ANISOU | 1534 | CA   | HIS | A | 115 | 8357   | 5335   | 5606   | 1423 | 1467  | 604 |
| ATOM   | 1535 | C    | HIS | A | 115 | 20.212 | 9.823  | -3.299 | 1.00 | 55.61 |     |
| C      |      |      |     |   |     |        |        |        |      |       |     |
| ANISOU | 1535 | C    | HIS | A | 115 | 9159   | 5909   | 6063   | 1614 | 1397  | 674 |
| ATOM   | 1536 | O    | HIS | A | 115 | 20.837 | 10.879 | -3.357 | 1.00 | 56.80 |     |
| O      |      |      |     |   |     |        |        |        |      |       |     |
| ANISOU | 1536 | O    | HIS | A | 115 | 9419   | 5830   | 6333   | 1616 | 1717  | 712 |
| ATOM   | 1537 | CB   | HIS | A | 115 | 21.062 | 7.799  | -4.561 | 1.00 | 54.82 |     |
| C      |      |      |     |   |     |        |        |        |      |       |     |
| ANISOU | 1537 | CB   | HIS | A | 115 | 9314   | 5711   | 5805   | 1511 | 1550  | 646 |

|        |      |     |     |   |     |        |        |        |      |       |     |
|--------|------|-----|-----|---|-----|--------|--------|--------|------|-------|-----|
| ATOM   | 1538 | CG  | HIS | A | 115 | 22.091 | 8.380  | -5.477 | 0.00 | 61.92 |     |
| C      |      |     |     |   |     |        |        |        |      |       |     |
| ANISOU | 1538 | CG  | HIS | A | 115 | 10622  | 6215   | 6690   | 1522 | 2091  | 709 |
| ATOM   | 1539 | ND1 | HIS | A | 115 | 23.381 | 8.017  | -5.667 | 0.00 | 67.32 |     |
| N      |      |     |     |   |     |        |        |        |      |       |     |
| ANISOU | 1539 | ND1 | HIS | A | 115 | 11880  | 6661   | 7036   | 1738 | 2242  | 823 |
| ATOM   | 1540 | CD2 | HIS | A | 115 | 21.800 | 9.456  | -6.304 | 0.00 | 64.81 |     |
| C      |      |     |     |   |     |        |        |        |      |       |     |
| ANISOU | 1540 | CD2 | HIS | A | 115 | 10898  | 6356   | 7370   | 1347 | 2529  | 664 |
| ATOM   | 1541 | CE1 | HIS | A | 115 | 23.894 | 8.863  | -6.629 | 0.00 | 69.14 |     |
| C      |      |     |     |   |     |        |        |        |      |       |     |
| ANISOU | 1541 | CE1 | HIS | A | 115 | 12384  | 6521   | 7363   | 1674 | 2822  | 854 |
| ATOM   | 1542 | NE2 | HIS | A | 115 | 22.914 | 9.704  | -6.977 | 0.00 | 68.10 |     |
| N      |      |     |     |   |     |        |        |        |      |       |     |
| ANISOU | 1542 | NE2 | HIS | A | 115 | 11833  | 6384   | 7660   | 1434 | 3019  | 749 |
| ATOM   | 1543 | H   | HIS | A | 115 | 20.062 | 6.734  | -2.510 | 1.00 | 0.00  |     |
| H      |      |     |     |   |     |        |        |        |      |       |     |
| ATOM   | 1544 | HA  | HIS | A | 115 | 22.005 | 8.748  | -2.903 | 1.00 | 0.00  |     |
| H      |      |     |     |   |     |        |        |        |      |       |     |
| ATOM   | 1545 | HB3 | HIS | A | 115 | 20.086 | 7.836  | -5.044 | 1.00 | 0.00  |     |
| H      |      |     |     |   |     |        |        |        |      |       |     |
| ATOM   | 1546 | HB2 | HIS | A | 115 | 21.272 | 6.741  | -4.406 | 1.00 | 0.00  |     |
| H      |      |     |     |   |     |        |        |        |      |       |     |
| ATOM   | 1547 | HD1 | HIS | A | 115 | 23.800 | 7.198  | -5.101 | 1.00 | 0.00  |     |
| H      |      |     |     |   |     |        |        |        |      |       |     |
| ATOM   | 1548 | HD2 | HIS | A | 115 | 20.878 | 9.869  | -6.290 | 1.00 | 0.00  |     |
| H      |      |     |     |   |     |        |        |        |      |       |     |
| ATOM   | 1549 | HE1 | HIS | A | 115 | 24.853 | 8.762  | -6.931 | 1.00 | 0.00  |     |
| H      |      |     |     |   |     |        |        |        |      |       |     |
| ATOM   | 1550 | N   | ALA | A | 116 | 18.862 | 9.761  | -3.242 | 1.00 | 51.94 |     |
| N      |      |     |     |   |     |        |        |        |      |       |     |
| ANISOU | 1550 | N   | ALA | A | 116 | 8681   | 5653   | 5399   | 1768 | 977   | 670 |
| ATOM   | 1551 | CA  | ALA | A | 116 | 17.976 | 10.927 | -3.295 | 1.00 | 53.05 |     |
| C      |      |     |     |   |     |        |        |        |      |       |     |
| ANISOU | 1551 | CA  | ALA | A | 116 | 8959   | 5776   | 5422   | 1979 | 829   | 719 |
| ATOM   | 1552 | C   | ALA | A | 116 | 18.132 | 11.835 | -2.069 | 1.00 | 54.60 |     |
| C      |      |     |     |   |     |        |        |        |      |       |     |
| ANISOU | 1552 | C   | ALA | A | 116 | 8819   | 6011   | 5914   | 1887 | 927   | 690 |
| ATOM   | 1553 | O   | ALA | A | 116 | 18.114 | 13.058 | -2.204 | 1.00 | 55.57 |     |
| O      |      |     |     |   |     |        |        |        |      |       |     |
| ANISOU | 1553 | O   | ALA | A | 116 | 9137   | 5970   | 6007   | 2011 | 1057  | 752 |
| ATOM   | 1554 | CB  | ALA | A | 116 | 16.531 | 10.479 | -3.435 | 1.00 | 54.45 |     |
| C      |      |     |     |   |     |        |        |        |      |       |     |
| ANISOU | 1554 | CB  | ALA | A | 116 | 9060   | 6168   | 5459   | 2133 | 331   | 667 |
| ATOM   | 1555 | H   | ALA | A | 116 | 18.401 | 8.867  | -3.157 | 1.00 | 0.00  |     |
| H      |      |     |     |   |     |        |        |        |      |       |     |
| ATOM   | 1556 | HA  | ALA | A | 116 | 18.236 | 11.508 | -4.180 | 1.00 | 0.00  |     |
| H      |      |     |     |   |     |        |        |        |      |       |     |
| ATOM   | 1557 | HB1 | ALA | A | 116 | 15.881 | 11.353 | -3.473 | 1.00 | 0.00  |     |
| H      |      |     |     |   |     |        |        |        |      |       |     |
| ATOM   | 1558 | HB2 | ALA | A | 116 | 16.416 | 9.901  | -4.352 | 1.00 | 0.00  |     |
| H      |      |     |     |   |     |        |        |        |      |       |     |
| ATOM   | 1559 | HB3 | ALA | A | 116 | 16.257 | 9.861  | -2.580 | 1.00 | 0.00  |     |
| H      |      |     |     |   |     |        |        |        |      |       |     |
| ATOM   | 1560 | N   | GLY | A | 117 | 18.300 | 11.229 | -0.897 | 1.00 | 47.65 |     |
| N      |      |     |     |   |     |        |        |        |      |       |     |
| ANISOU | 1560 | N   | GLY | A | 117 | 7491   | 5322   | 5292   | 1683 | 866   | 595 |

|        |      |     |     |   |     |        |        |        |      |       |     |
|--------|------|-----|-----|---|-----|--------|--------|--------|------|-------|-----|
| ATOM C | 1561 | CA  | GLY | A | 117 | 18.483 | 11.951 | 0.356  | 1.00 | 45.74 |     |
| ANISOU | 1561 | CA  | GLY | A | 117 | 6963   | 5116   | 5301   | 1587 | 924   | 542 |
| ATOM C | 1562 | C   | GLY | A | 117 | 19.819 | 12.649 | 0.475  | 1.00 | 48.97 |     |
| ANISOU | 1562 | C   | GLY | A | 117 | 7407   | 5271   | 5929   | 1479 | 1285  | 536 |
| ATOM O | 1563 | O   | GLY | A | 117 | 19.881 | 13.774 | 0.973  | 1.00 | 48.70 |     |
| ANISOU | 1563 | O   | GLY | A | 117 | 7341   | 5149   | 6015   | 1499 | 1381  | 526 |
| ATOM H | 1564 | H   | GLY | A | 117 | 18.305 | 10.220 | -0.846 | 1.00 | 0.00  |     |
| ATOM H | 1565 | HA3 | GLY | A | 117 | 18.360 | 11.262 | 1.191  | 1.00 | 0.00  |     |
| ATOM H | 1566 | HA2 | GLY | A | 117 | 17.682 | 12.681 | 0.473  | 1.00 | 0.00  |     |
| ATOM N | 1567 | N   | PHE | A | 118 | 20.898 | 11.999 | 0.011  | 1.00 | 44.73 |     |
| ANISOU | 1567 | N   | PHE | A | 118 | 6912   | 4592   | 5493   | 1360 | 1500  | 524 |
| ATOM C | 1568 | CA  | PHE | A | 118 | 22.237 | 12.568 | 0.113  | 1.00 | 45.60 |     |
| ANISOU | 1568 | CA  | PHE | A | 118 | 6979   | 4418   | 5927   | 1236 | 1863  | 478 |
| ATOM C | 1569 | C   | PHE | A | 118 | 22.528 | 13.621 | -0.969 | 1.00 | 54.88 |     |
| ANISOU | 1569 | C   | PHE | A | 118 | 8577   | 5260   | 7016   | 1355 | 2250  | 580 |
| ATOM O | 1570 | O   | PHE | A | 118 | 23.468 | 14.398 | -0.803 | 1.00 | 56.83 |     |
| ANISOU | 1570 | O   | PHE | A | 118 | 8772   | 5241   | 7581   | 1264 | 2581  | 532 |
| ATOM C | 1571 | CB  | PHE | A | 118 | 23.316 | 11.470 | 0.193  | 1.00 | 46.75 |     |
| ANISOU | 1571 | CB  | PHE | A | 118 | 6921   | 4515   | 6326   | 1054 | 1949  | 391 |
| ATOM C | 1572 | CG  | PHE | A | 118 | 23.573 | 11.083 | 1.634  | 1.00 | 46.47 |     |
| ANISOU | 1572 | CG  | PHE | A | 118 | 6465   | 4638   | 6555   | 910  | 1691  | 257 |
| ATOM C | 1573 | CD1 | PHE | A | 118 | 22.676 | 10.273 | 2.326  | 1.00 | 47.60 |     |
| ANISOU | 1573 | CD1 | PHE | A | 118 | 6472   | 5093   | 6522   | 909  | 1327  | 249 |
| ATOM C | 1574 | CD2 | PHE | A | 118 | 24.656 | 11.609 | 2.329  | 1.00 | 49.39 |     |
| ANISOU | 1574 | CD2 | PHE | A | 118 | 6608   | 4812   | 7346   | 791  | 1806  | 130 |
| ATOM C | 1575 | CE1 | PHE | A | 118 | 22.875 | 9.974  | 3.678  | 1.00 | 47.35 |     |
| ANISOU | 1575 | CE1 | PHE | A | 118 | 6166   | 5166   | 6659   | 803  | 1106  | 141 |
| ATOM C | 1576 | CE2 | PHE | A | 118 | 24.859 | 11.299 | 3.679  | 1.00 | 51.08 |     |
| ANISOU | 1576 | CE2 | PHE | A | 118 | 6521   | 5145   | 7743   | 696  | 1504  | 1   |
| ATOM C | 1577 | CZ  | PHE | A | 118 | 23.970 | 10.482 | 4.343  | 1.00 | 47.41 |     |
| ANISOU | 1577 | CZ  | PHE | A | 118 | 6009   | 4982   | 7025   | 709  | 1167  | 20  |
| ATOM H | 1578 | H   | PHE | A | 118 | 20.794 | 11.092 | -0.422 | 1.00 | 0.00  |     |
| ATOM H | 1579 | HA  | PHE | A | 118 | 22.270 | 13.096 | 1.066  | 1.00 | 0.00  |     |
| ATOM H | 1580 | HB3 | PHE | A | 118 | 24.240 | 11.836 | -0.255 | 1.00 | 0.00  |     |
| ATOM H | 1581 | HB2 | PHE | A | 118 | 22.985 | 10.594 | -0.365 | 1.00 | 0.00  |     |

|          |      |     |     |   |     |        |        |        |      |        |     |
|----------|------|-----|-----|---|-----|--------|--------|--------|------|--------|-----|
| ATOM H   | 1582 | HD1 | PHE | A | 118 | 21.813 | 9.867  | 1.819  | 1.00 | 0.00   |     |
| ATOM H   | 1583 | HD2 | PHE | A | 118 | 25.352 | 12.265 | 1.828  | 1.00 | 0.00   |     |
| ATOM H   | 1584 | HE1 | PHE | A | 118 | 22.170 | 9.345  | 4.201  | 1.00 | 0.00   |     |
| ATOM H   | 1585 | HE2 | PHE | A | 118 | 25.714 | 11.700 | 4.203  | 1.00 | 0.00   |     |
| ATOM H   | 1586 | HZ  | PHE | A | 118 | 24.130 | 10.240 | 5.383  | 1.00 | 0.00   |     |
| ATOM N   | 1587 | N   | LYS | A | 119 | 21.699 | 13.710 | -2.023 | 1.00 | 53.74  |     |
| ANISOU   | 1587 | N   | LYS | A | 119 | 8863   | 5101   | 6454   | 1567 | 2195   | 707 |
| ATOM C   | 1588 | CA  | LYS | A | 119 | 21.871 | 14.766 | -3.030 | 1.00 | 57.68  |     |
| ANISOU   | 1588 | CA  | LYS | A | 119 | 9876   | 5256   | 6783   | 1721 | 2545   | 828 |
| ATOM C   | 1589 | C   | LYS | A | 119 | 21.117 | 16.006 | -2.544 | 1.00 | 62.75  |     |
| ANISOU   | 1589 | C   | LYS | A | 119 | 10519  | 5923   | 7402   | 1856 | 2419   | 860 |
| ATOM O   | 1590 | O   | LYS | A | 119 | 21.600 | 17.133 | -2.702 | 1.00 | 64.70  |     |
| ANISOU   | 1590 | O   | LYS | A | 119 | 10954  | 5872   | 7756   | 1878 | 2770   | 901 |
| ATOM C   | 1591 | CB  | LYS | A | 119 | 21.374 | 14.330 | -4.425 | 1.00 | 62.96  |     |
| ANISOU   | 1591 | CB  | LYS | A | 119 | 11105  | 5854   | 6962   | 1928 | 2494   | 946 |
| ATOM C   | 1592 | CG  | LYS | A | 119 | 22.191 | 13.210 | -5.084 | 0.00 | 82.40  |     |
| ANISOU   | 1592 | CG  | LYS | A | 119 | 13676  | 8224   | 9409   | 1815 | 2704   | 924 |
| ATOM C   | 1593 | CD  | LYS | A | 119 | 21.669 | 12.777 | -6.452 | 0.00 | 96.93  |     |
| ANISOU   | 1593 | CD  | LYS | A | 119 | 15767  | 9616   | 11446  | 1716 | 3383   | 945 |
| ATOM C   | 1594 | CE  | LYS | A | 119 | 22.531 | 11.695 | -7.049 | 0.00 | 106.83 |     |
| ANISOU   | 1594 | CE  | LYS | A | 119 | 16656  | 10860  | 13075  | 1471 | 3563   | 821 |
| ATOM N1+ | 1595 | NZ  | LYS | A | 119 | 22.019 | 11.248 | -8.370 | 0.00 | 119.45 |     |
| ANISOU   | 1595 | NZ  | LYS | A | 119 | 18741  | 12140  | 14507  | 1487 | 4013   | 872 |
| ATOM H   | 1596 | H   | LYS | A | 119 | 20.946 | 13.046 | -2.131 | 1.00 | 0.00   |     |
| ATOM H   | 1597 | HA  | LYS | A | 119 | 22.931 | 15.010 | -3.100 | 1.00 | 0.00   |     |
| ATOM H   | 1598 | HB3 | LYS | A | 119 | 21.350 | 15.196 | -5.086 | 1.00 | 0.00   |     |
| ATOM H   | 1599 | HB2 | LYS | A | 119 | 20.331 | 14.022 | -4.356 | 1.00 | 0.00   |     |
| ATOM H   | 1600 | HG3 | LYS | A | 119 | 22.222 | 12.347 | -4.419 | 1.00 | 0.00   |     |
| ATOM H   | 1601 | HG2 | LYS | A | 119 | 23.230 | 13.528 | -5.178 | 1.00 | 0.00   |     |
| ATOM H   | 1602 | HD3 | LYS | A | 119 | 21.650 | 13.637 | -7.122 | 1.00 | 0.00   |     |
| ATOM H   | 1603 | HD2 | LYS | A | 119 | 20.647 | 12.412 | -6.351 | 1.00 | 0.00   |     |
| ATOM H   | 1604 | HE3 | LYS | A | 119 | 22.569 | 10.845 | -6.368 | 1.00 | 0.00   |     |
| ATOM H   | 1605 | HE2 | LYS | A | 119 | 23.550 | 12.064 | -7.161 | 1.00 | 0.00   |     |

|        |      |     |     |   |     |        |        |        |      |       |     |
|--------|------|-----|-----|---|-----|--------|--------|--------|------|-------|-----|
| ATOM   | 1606 | HZ1 | LYS | A | 119 | 22.005 | 12.030 | -9.009 | 1.00 | 0.00  |     |
| H      |      |     |     |   |     |        |        |        |      |       |     |
| ATOM   | 1607 | HZ2 | LYS | A | 119 | 22.621 | 10.525 | -8.738 | 1.00 | 0.00  |     |
| H      |      |     |     |   |     |        |        |        |      |       |     |
| ATOM   | 1608 | HZ3 | LYS | A | 119 | 21.083 | 10.884 | -8.263 | 1.00 | 0.00  |     |
| H      |      |     |     |   |     |        |        |        |      |       |     |
| ATOM   | 1609 | N   | MET | A | 120 | 19.944 | 15.779 | -1.919 | 1.00 | 57.26 |     |
| N      |      |     |     |   |     |        |        |        |      |       |     |
| ANISOU | 1609 | N   | MET | A | 120 | 9589   | 5560   | 6606   | 1935 | 1947  | 828 |
| ATOM   | 1610 | CA  | MET | A | 120 | 19.053 | 16.794 | -1.358 | 1.00 | 56.77 |     |
| C      |      |     |     |   |     |        |        |        |      |       |     |
| ANISOU | 1610 | CA  | MET | A | 120 | 9457   | 5568   | 6544   | 2068 | 1771  | 835 |
| ATOM   | 1611 | C   | MET | A | 120 | 19.656 | 17.444 | -0.099 | 1.00 | 55.99 |     |
| C      |      |     |     |   |     |        |        |        |      |       |     |
| ANISOU | 1611 | C   | MET | A | 120 | 8996   | 5451   | 6828   | 1885 | 1917  | 728 |
| ATOM   | 1612 | O   | MET | A | 120 | 19.515 | 18.652 | 0.093  | 1.00 | 56.43 |     |
| O      |      |     |     |   |     |        |        |        |      |       |     |
| ANISOU | 1612 | O   | MET | A | 120 | 9138   | 5359   | 6943   | 1966 | 2037  | 750 |
| ATOM   | 1613 | CB  | MET | A | 120 | 17.694 | 16.142 | -1.054 | 1.00 | 58.41 |     |
| C      |      |     |     |   |     |        |        |        |      |       |     |
| ANISOU | 1613 | CB  | MET | A | 120 | 9458   | 6113   | 6623   | 2169 | 1277  | 794 |
| ATOM   | 1614 | CG  | MET | A | 120 | 16.674 | 17.055 | -0.409 | 1.00 | 62.75 |     |
| C      |      |     |     |   |     |        |        |        |      |       |     |
| ANISOU | 1614 | CG  | MET | A | 120 | 9853   | 6751   | 7237   | 2295 | 1092  | 770 |
| ATOM   | 1615 | SD  | MET | A | 120 | 15.225 | 16.128 | 0.145  | 1.00 | 66.51 |     |
| S      |      |     |     |   |     |        |        |        |      |       |     |
| ANISOU | 1615 | SD  | MET | A | 120 | 9950   | 7589   | 7730   | 2337 | 613   | 669 |
| ATOM   | 1616 | CE  | MET | A | 120 | 15.871 | 15.313 | 1.568  | 1.00 | 59.90 |     |
| C      |      |     |     |   |     |        |        |        |      |       |     |
| ANISOU | 1616 | CE  | MET | A | 120 | 8670   | 6941   | 7147   | 2008 | 697   | 549 |
| ATOM   | 1617 | H   | MET | A | 120 | 19.608 | 14.834 | -1.804 | 1.00 | 0.00  |     |
| H      |      |     |     |   |     |        |        |        |      |       |     |
| ATOM   | 1618 | HA  | MET | A | 120 | 18.902 | 17.571 | -2.107 | 1.00 | 0.00  |     |
| H      |      |     |     |   |     |        |        |        |      |       |     |
| ATOM   | 1619 | HB3 | MET | A | 120 | 17.847 | 15.268 | -0.421 | 1.00 | 0.00  |     |
| H      |      |     |     |   |     |        |        |        |      |       |     |
| ATOM   | 1620 | HB2 | MET | A | 120 | 17.278 | 15.730 | -1.973 | 1.00 | 0.00  |     |
| H      |      |     |     |   |     |        |        |        |      |       |     |
| ATOM   | 1621 | HG3 | MET | A | 120 | 16.365 | 17.817 | -1.125 | 1.00 | 0.00  |     |
| H      |      |     |     |   |     |        |        |        |      |       |     |
| ATOM   | 1622 | HG2 | MET | A | 120 | 17.128 | 17.562 | 0.443  | 1.00 | 0.00  |     |
| H      |      |     |     |   |     |        |        |        |      |       |     |
| ATOM   | 1623 | HE1 | MET | A | 120 | 15.092 | 14.700 | 2.021  | 1.00 | 0.00  |     |
| H      |      |     |     |   |     |        |        |        |      |       |     |
| ATOM   | 1624 | HE2 | MET | A | 120 | 16.708 | 14.678 | 1.275  | 1.00 | 0.00  |     |
| H      |      |     |     |   |     |        |        |        |      |       |     |
| ATOM   | 1625 | HE3 | MET | A | 120 | 16.214 | 16.056 | 2.288  | 1.00 | 0.00  |     |
| H      |      |     |     |   |     |        |        |        |      |       |     |
| ATOM   | 1626 | N   | MET | A | 121 | 20.296 | 16.639 | 0.759  | 1.00 | 48.67 |     |
| N      |      |     |     |   |     |        |        |        |      |       |     |
| ANISOU | 1626 | N   | MET | A | 121 | 7690   | 4654   | 6147   | 1656 | 1872  | 604 |
| ATOM   | 1627 | CA  | MET | A | 121 | 20.918 | 17.107 | 2.000  | 1.00 | 46.57 |     |
| C      |      |     |     |   |     |        |        |        |      |       |     |
| ANISOU | 1627 | CA  | MET | A | 121 | 7102   | 4365   | 6228   | 1489 | 1920  | 470 |
| ATOM   | 1628 | C   | MET | A | 121 | 22.450 | 17.110 | 1.879  | 1.00 | 52.14 |     |
| C      |      |     |     |   |     |        |        |        |      |       |     |
| ANISOU | 1628 | C   | MET | A | 121 | 7738   | 4789   | 7282   | 1309 | 2252  | 393 |

|        |      |     |     |   |     |        |        |        |      |       |     |
|--------|------|-----|-----|---|-----|--------|--------|--------|------|-------|-----|
| ATOM O | 1629 | O   | MET | A | 121 | 23.156 | 16.922 | 2.874  | 1.00 | 50.22 |     |
| ANISOU | 1629 | O   | MET | A | 121 | 7167   | 4558   | 7356   | 1140 | 2177  | 239 |
| ATOM C | 1630 | CB  | MET | A | 121 | 20.452 | 16.253 | 3.191  | 1.00 | 45.54 |     |
| ANISOU | 1630 | CB  | MET | A | 121 | 6630   | 4554   | 6120   | 1393 | 1572  | 367 |
| ATOM C | 1631 | CG  | MET | A | 121 | 18.957 | 16.259 | 3.380  | 1.00 | 47.16 |     |
| ANISOU | 1631 | CG  | MET | A | 121 | 6827   | 4992   | 6099   | 1545 | 1311  | 405 |
| ATOM S | 1632 | SD  | MET | A | 121 | 18.422 | 15.267 | 4.780  | 1.00 | 47.56 |     |
| ANISOU | 1632 | SD  | MET | A | 121 | 6545   | 5344   | 6181   | 1418 | 1032  | 290 |
| ATOM C | 1633 | CE  | MET | A | 121 | 18.711 | 13.569 | 4.149  | 1.00 | 43.56 |     |
| ANISOU | 1633 | CE  | MET | A | 121 | 6012   | 4963   | 5575   | 1343 | 919   | 317 |
| ATOM H | 1634 | H   | MET | A | 121 | 20.369 | 15.650 | 0.565  | 1.00 | 0.00  |     |
| ATOM H | 1635 | HA  | MET | A | 121 | 20.592 | 18.133 | 2.174  | 1.00 | 0.00  |     |
| ATOM H | 1636 | HB3 | MET | A | 121 | 20.933 | 16.609 | 4.102  | 1.00 | 0.00  |     |
| ATOM H | 1637 | HB2 | MET | A | 121 | 20.796 | 15.227 | 3.057  | 1.00 | 0.00  |     |
| ATOM H | 1638 | HG3 | MET | A | 121 | 18.476 | 15.894 | 2.473  | 1.00 | 0.00  |     |
| ATOM H | 1639 | HG2 | MET | A | 121 | 18.613 | 17.285 | 3.511  | 1.00 | 0.00  |     |
| ATOM H | 1640 | HE1 | MET | A | 121 | 18.424 | 12.844 | 4.911  | 1.00 | 0.00  |     |
| ATOM H | 1641 | HE2 | MET | A | 121 | 18.114 | 13.408 | 3.251  | 1.00 | 0.00  |     |
| ATOM H | 1642 | HE3 | MET | A | 121 | 19.767 | 13.445 | 3.909  | 1.00 | 0.00  |     |
| ATOM N | 1643 | N   | SER | A | 122 | 22.957 | 17.358 | 0.657  | 1.00 | 52.66 |     |
| ANISOU | 1643 | N   | SER | A | 122 | 8136   | 4565   | 7309   | 1357 | 2625  | 488 |
| ATOM C | 1644 | CA  | SER | A | 122 | 24.391 | 17.402 | 0.370  | 1.00 | 55.49 |     |
| ANISOU | 1644 | CA  | SER | A | 122 | 8431   | 4586   | 8065   | 1190 | 3040  | 409 |
| ATOM C | 1645 | C   | SER | A | 122 | 25.055 | 18.608 | 1.023  | 1.00 | 61.78 |     |
| ANISOU | 1645 | C   | SER | A | 122 | 9057   | 5141   | 9276   | 1101 | 3238  | 291 |
| ATOM O | 1646 | O   | SER | A | 122 | 24.379 | 19.594 | 1.325  | 1.00 | 60.49 |     |
| ANISOU | 1646 | O   | SER | A | 122 | 9002   | 4994   | 8986   | 1216 | 3178  | 335 |
| ATOM C | 1647 | CB  | SER | A | 122 | 24.644 | 17.402 | -1.136 | 1.00 | 61.65 |     |
| ANISOU | 1647 | CB  | SER | A | 122 | 9696   | 5077   | 8650   | 1279 | 3463  | 551 |
| ATOM O | 1648 | OG  | SER | A | 122 | 24.261 | 18.616 | -1.759 | 1.00 | 72.10 |     |
| ANISOU | 1648 | OG  | SER | A | 122 | 11448  | 6161   | 9785   | 1448 | 3713  | 681 |
| ATOM H | 1649 | H   | SER | A | 122 | 22.337 | 17.526 | -0.122 | 1.00 | 0.00  |     |
| ATOM H | 1650 | HA  | SER | A | 122 | 24.844 | 16.503 | 0.787  | 1.00 | 0.00  |     |
| ATOM H | 1651 | HB3 | SER | A | 122 | 24.103 | 16.574 | -1.594 | 1.00 | 0.00  |     |

|          |      |     |     |   |     |        |        |        |      |        |       |
|----------|------|-----|-----|---|-----|--------|--------|--------|------|--------|-------|
| ATOM H   | 1652 | HB2 | SER | A | 122 | 25.701 | 17.215 | -1.326 | 1.00 | 0.00   |       |
| ATOM H   | 1653 | HG  | SER | A | 122 | 23.408 | 18.503 | -2.185 | 1.00 | 0.00   |       |
| ATOM N   | 1654 | N   | LYS | A | 123 | 26.383 | 18.516 | 1.243  | 1.00 | 61.64  |       |
| ANISOU   | 1654 | N   | LYS | A | 123 | 8748   | 4878   | 9794   | 900  | 3459   | 122   |
| ATOM C   | 1655 | CA  | LYS | A | 123 | 27.199 | 19.575 | 1.842  | 1.00 | 63.77  |       |
| ANISOU   | 1655 | CA  | LYS | A | 123 | 8796   | 4860   | 10574  | 785  | 3648   | -45   |
| ATOM C   | 1656 | C   | LYS | A | 123 | 27.060 | 20.895 | 1.081  | 1.00 | 69.01  |       |
| ANISOU   | 1656 | C   | LYS | A | 123 | 9852   | 5203   | 11167  | 891  | 4102   | 81    |
| ATOM O   | 1657 | O   | LYS | A | 123 | 27.036 | 21.951 | 1.709  | 1.00 | 68.03  |       |
| ANISOU   | 1657 | O   | LYS | A | 123 | 9652   | 4980   | 11215  | 887  | 4107   | 9     |
| ATOM C   | 1658 | CB  | LYS | A | 123 | 28.666 | 19.133 | 1.941  | 1.00 | 69.06  |       |
| ANISOU   | 1658 | CB  | LYS | A | 123 | 9098   | 5253   | 11889  | 571  | 3851   | -256  |
| ATOM C   | 1659 | CG  | LYS | A | 123 | 29.132 | 18.893 | 3.374  | 1.00 | 88.88  |       |
| ANISOU   | 1659 | CG  | LYS | A | 123 | 11112  | 7873   | 14784  | 446  | 3393   | -513  |
| ATOM C   | 1660 | CD  | LYS | A | 123 | 30.169 | 19.936 | 3.802  | 1.00 | 105.11 |       |
| ANISOU   | 1660 | CD  | LYS | A | 123 | 12885  | 9517   | 17536  | 306  | 3620   | -751  |
| ATOM C   | 1661 | CE  | LYS | A | 123 | 30.703 | 19.715 | 5.199  | 1.00 | 118.19 |       |
| ANISOU   | 1661 | CE  | LYS | A | 123 | 14090  | 11236  | 19579  | 206  | 3099   | -1037 |
| ATOM N1+ | 1662 | NZ  | LYS | A | 123 | 29.772 | 20.223 | 6.243  | 1.00 | 125.73 |       |
| ANISOU   | 1662 | NZ  | LYS | A | 123 | 15127  | 12440  | 20204  | 291  | 2687   | -1047 |
| ATOM H   | 1663 | H   | LYS | A | 123 | 26.880 | 17.674 | 0.989  | 1.00 | 0.00   |       |
| ATOM H   | 1664 | HA  | LYS | A | 123 | 26.835 | 19.739 | 2.856  | 1.00 | 0.00   |       |
| ATOM H   | 1665 | HB3 | LYS | A | 123 | 29.303 | 19.885 | 1.475  | 1.00 | 0.00   |       |
| ATOM H   | 1666 | HB2 | LYS | A | 123 | 28.810 | 18.224 | 1.357  | 1.00 | 0.00   |       |
| ATOM H   | 1667 | HG3 | LYS | A | 123 | 29.566 | 17.896 | 3.452  | 1.00 | 0.00   |       |
| ATOM H   | 1668 | HG2 | LYS | A | 123 | 28.275 | 18.936 | 4.046  | 1.00 | 0.00   |       |
| ATOM H   | 1669 | HD3 | LYS | A | 123 | 29.730 | 20.931 | 3.736  | 1.00 | 0.00   |       |
| ATOM H   | 1670 | HD2 | LYS | A | 123 | 30.997 | 19.934 | 3.094  | 1.00 | 0.00   |       |
| ATOM H   | 1671 | HE3 | LYS | A | 123 | 31.668 | 20.212 | 5.301  | 1.00 | 0.00   |       |
| ATOM H   | 1672 | HE2 | LYS | A | 123 | 30.878 | 18.651 | 5.356  | 1.00 | 0.00   |       |
| ATOM H   | 1673 | HZ1 | LYS | A | 123 | 29.921 | 21.213 | 6.374  | 1.00 | 0.00   |       |
| ATOM H   | 1674 | HZ2 | LYS | A | 123 | 28.818 | 20.062 | 5.952  | 1.00 | 0.00   |       |
| ATOM H   | 1675 | HZ3 | LYS | A | 123 | 29.944 | 19.739 | 7.113  | 1.00 | 0.00   |       |

|        |      |     |     |   |     |        |        |        |      |        |      |
|--------|------|-----|-----|---|-----|--------|--------|--------|------|--------|------|
| ATOM   | 1676 | N   | GLU | A | 124 | 26.905 | 20.819 | -0.258 | 1.00 | 67.15  |      |
| N      |      |     |     |   |     |        |        |        |      |        |      |
| ANISOU | 1676 | N   | GLU | A | 124 | 10089  | 4792   | 10631  | 1001 | 4470   | 274  |
| ATOM   | 1677 | CA  | GLU | A | 124 | 26.704 | 21.949 | -1.170 | 1.00 | 69.75  |      |
| C      |      |     |     |   |     |        |        |        |      |        |      |
| ANISOU | 1677 | CA  | GLU | A | 124 | 10946  | 4784   | 10770  | 1147 | 4919   | 442  |
| ATOM   | 1678 | C   | GLU | A | 124 | 25.354 | 22.639 | -0.912 | 1.00 | 70.48  |      |
| C      |      |     |     |   |     |        |        |        |      |        |      |
| ANISOU | 1678 | C   | GLU | A | 124 | 11252  | 5112   | 10413  | 1377 | 4565   | 570  |
| ATOM   | 1679 | O   | GLU | A | 124 | 25.297 | 23.868 | -0.834 | 1.00 | 70.32  |      |
| O      |      |     |     |   |     |        |        |        |      |        |      |
| ANISOU | 1679 | O   | GLU | A | 124 | 11357  | 4871   | 10490  | 1427 | 4763   | 585  |
| ATOM   | 1680 | CB  | GLU | A | 124 | 26.802 | 21.457 | -2.626 | 1.00 | 73.36  |      |
| C      |      |     |     |   |     |        |        |        |      |        |      |
| ANISOU | 1680 | CB  | GLU | A | 124 | 11939  | 5034   | 10898  | 1240 | 5302   | 618  |
| ATOM   | 1681 | CG  | GLU | A | 124 | 26.717 | 22.549 | -3.676 | 1.00 | 89.45  |      |
| C      |      |     |     |   |     |        |        |        |      |        |      |
| ANISOU | 1681 | CG  | GLU | A | 124 | 14658  | 6662   | 12668  | 1416 | 5802   | 813  |
| ATOM   | 1682 | CD  | GLU | A | 124 | 25.563 | 22.376 | -4.644 | 1.00 | 114.26 |      |
| C      |      |     |     |   |     |        |        |        |      |        |      |
| ANISOU | 1682 | CD  | GLU | A | 124 | 18434  | 9944   | 15037  | 1730 | 5559   | 1055 |
| ATOM   | 1683 | OE1 | GLU | A | 124 | 24.394 | 22.466 | -4.202 | 1.00 | 106.71 |      |
| O      |      |     |     |   |     |        |        |        |      |        |      |
| ANISOU | 1683 | OE1 | GLU | A | 124 | 17353  | 9397   | 13795  | 1873 | 4947   | 1079 |
| ATOM   | 1684 | OE2 | GLU | A | 124 | 25.827 | 22.155 | -5.848 | 1.00 | 113.21 |      |
| O1-    |      |     |     |   |     |        |        |        |      |        |      |
| ANISOU | 1684 | OE2 | GLU | A | 124 | 18942  | 9474   | 14597  | 1843 | 5987   | 1208 |
| ATOM   | 1685 | H   | GLU | A | 124 | 26.922 | 19.920 | -0.718 | 1.00 | 0.00   |      |
| H      |      |     |     |   |     |        |        |        |      |        |      |
| ATOM   | 1686 | HA  | GLU | A | 124 | 27.499 | 22.675 | -0.998 | 1.00 | 0.00   |      |
| H      |      |     |     |   |     |        |        |        |      |        |      |
| ATOM   | 1687 | HB3 | GLU | A | 124 | 26.022 | 20.718 | -2.810 | 1.00 | 0.00   |      |
| H      |      |     |     |   |     |        |        |        |      |        |      |
| ATOM   | 1688 | HB2 | GLU | A | 124 | 27.731 | 20.902 | -2.757 | 1.00 | 0.00   |      |
| H      |      |     |     |   |     |        |        |        |      |        |      |
| ATOM   | 1689 | HG3 | GLU | A | 124 | 27.653 | 22.589 | -4.233 | 1.00 | 0.00   |      |
| H      |      |     |     |   |     |        |        |        |      |        |      |
| ATOM   | 1690 | HG2 | GLU | A | 124 | 26.634 | 23.518 | -3.184 | 1.00 | 0.00   |      |
| H      |      |     |     |   |     |        |        |        |      |        |      |
| ATOM   | 1691 | N   | ARG | A | 125 | 24.280 | 21.839 | -0.785 | 1.00 | 63.75  |      |
| N      |      |     |     |   |     |        |        |        |      |        |      |
| ANISOU | 1691 | N   | ARG | A | 125 | 10410  | 4686   | 9127   | 1510 | 4054   | 643  |
| ATOM   | 1692 | CA  | ARG | A | 125 | 22.917 | 22.307 | -0.526 | 1.00 | 62.29  |      |
| C      |      |     |     |   |     |        |        |        |      |        |      |
| ANISOU | 1692 | CA  | ARG | A | 125 | 10346  | 4743   | 8578   | 1732 | 3675   | 735  |
| ATOM   | 1693 | C   | ARG | A | 125 | 22.828 | 22.922 | 0.876  | 1.00 | 62.44  |      |
| C      |      |     |     |   |     |        |        |        |      |        |      |
| ANISOU | 1693 | C   | ARG | A | 125 | 9953   | 4880   | 8892   | 1640 | 3480   | 576  |
| ATOM   | 1694 | O   | ARG | A | 125 | 22.141 | 23.930 | 1.059  | 1.00 | 62.53  |      |
| O      |      |     |     |   |     |        |        |        |      |        |      |
| ANISOU | 1694 | O   | ARG | A | 125 | 10101  | 4854   | 8803   | 1787 | 3448   | 628  |
| ATOM   | 1695 | CB  | ARG | A | 125 | 21.916 | 21.146 | -0.674 | 1.00 | 62.13  |      |
| C      |      |     |     |   |     |        |        |        |      |        |      |
| ANISOU | 1695 | CB  | ARG | A | 125 | 10314  | 5122   | 8171   | 1844 | 3197   | 790  |
| ATOM   | 1696 | CG  | ARG | A | 125 | 21.803 | 20.589 | -2.099 | 1.00 | 75.44  |      |
| C      |      |     |     |   |     |        |        |        |      |        |      |
| ANISOU | 1696 | CG  | ARG | A | 125 | 12497  | 6697   | 9470   | 1989 | 3304   | 946  |

|        |      |      |     |   |     |        |        |        |      |        |      |
|--------|------|------|-----|---|-----|--------|--------|--------|------|--------|------|
| ATOM   | 1697 | CD   | ARG | A | 125 | 20.555 | 21.041 | -2.834 | 1.00 | 87.12  |      |
| C      |      |      |     |   |     |        |        |        |      |        |      |
| ANISOU | 1697 | CD   | ARG | A | 125 | 14441  | 8188   | 10471  | 2320 | 3075   | 1108 |
| ATOM   | 1698 | NE   | ARG | A | 125 | 19.334 | 20.535 | -2.200 | 1.00 | 92.29  |      |
| N      |      |      |     |   |     |        |        |        |      |        |      |
| ANISOU | 1698 | NE   | ARG | A | 125 | 14798  | 9260   | 11008  | 2411 | 2494   | 1060 |
| ATOM   | 1699 | CZ   | ARG | A | 125 | 18.339 | 21.306 | -1.775 | 1.00 | 101.05 |      |
| C      |      |      |     |   |     |        |        |        |      |        |      |
| ANISOU | 1699 | CZ   | ARG | A | 125 | 15856  | 10457  | 12080  | 2580 | 2250   | 1069 |
| ATOM   | 1700 | NH1  | ARG | A | 125 | 18.393 | 22.623 | -1.932 | 1.00 | 86.72  |      |
| N      |      |      |     |   |     |        |        |        |      |        |      |
| ANISOU | 1700 | NH1  | ARG | A | 125 | 14299  | 8358   | 10291  | 2691 | 2497   | 1138 |
| ATOM   | 1701 | NH2  | ARG | A | 125 | 17.272 | 20.763 | -1.201 | 1.00 | 81.97  |      |
| N1+    |      |      |     |   |     |        |        |        |      |        |      |
| ANISOU | 1701 | NH2  | ARG | A | 125 | 13128  | 8384   | 9630   | 2639 | 1788   | 1001 |
| ATOM   | 1702 | H    | ARG | A | 125 | 24.383 | 20.838 | -0.868 | 1.00 | 0.00   |      |
| H      |      |      |     |   |     |        |        |        |      |        |      |
| ATOM   | 1703 | HA   | ARG | A | 125 | 22.669 | 23.075 | -1.258 | 1.00 | 0.00   |      |
| H      |      |      |     |   |     |        |        |        |      |        |      |
| ATOM   | 1704 | HB3  | ARG | A | 125 | 20.933 | 21.471 | -0.334 | 1.00 | 0.00   |      |
| H      |      |      |     |   |     |        |        |        |      |        |      |
| ATOM   | 1705 | HB2  | ARG | A | 125 | 22.193 | 20.341 | 0.007  | 1.00 | 0.00   |      |
| H      |      |      |     |   |     |        |        |        |      |        |      |
| ATOM   | 1706 | HG3  | ARG | A | 125 | 21.828 | 19.500 | -2.065 | 1.00 | 0.00   |      |
| H      |      |      |     |   |     |        |        |        |      |        |      |
| ATOM   | 1707 | HG2  | ARG | A | 125 | 22.684 | 20.878 | -2.671 | 1.00 | 0.00   |      |
| H      |      |      |     |   |     |        |        |        |      |        |      |
| ATOM   | 1708 | HD3  | ARG | A | 125 | 20.597 | 20.695 | -3.867 | 1.00 | 0.00   |      |
| H      |      |      |     |   |     |        |        |        |      |        |      |
| ATOM   | 1709 | HD2  | ARG | A | 125 | 20.525 | 22.130 | -2.861 | 1.00 | 0.00   |      |
| H      |      |      |     |   |     |        |        |        |      |        |      |
| ATOM   | 1710 | HE   | ARG | A | 125 | 19.276 | 19.532 | -2.094 | 1.00 | 0.00   |      |
| H      |      |      |     |   |     |        |        |        |      |        |      |
| ATOM   | 1711 | HH12 | ARG | A | 125 | 17.632 | 23.202 | -1.606 | 1.00 | 0.00   |      |
| H      |      |      |     |   |     |        |        |        |      |        |      |
| ATOM   | 1712 | HH11 | ARG | A | 125 | 19.195 | 23.046 | -2.377 | 1.00 | 0.00   |      |
| H      |      |      |     |   |     |        |        |        |      |        |      |
| ATOM   | 1713 | HH22 | ARG | A | 125 | 16.517 | 21.352 | -0.879 | 1.00 | 0.00   |      |
| H      |      |      |     |   |     |        |        |        |      |        |      |
| ATOM   | 1714 | HH21 | ARG | A | 125 | 17.215 | 19.761 | -1.086 | 1.00 | 0.00   |      |
| H      |      |      |     |   |     |        |        |        |      |        |      |
| ATOM   | 1715 | N    | LEU | A | 126 | 23.556 | 22.337 | 1.851  | 1.00 | 55.61  |      |
| N      |      |      |     |   |     |        |        |        |      |        |      |
| ANISOU | 1715 | N    | LEU | A | 126 | 8621   | 4125   | 8385   | 1411 | 3347   | 377  |
| ATOM   | 1716 | CA   | LEU | A | 126 | 23.599 | 22.827 | 3.226  | 1.00 | 54.00  |      |
| C      |      |      |     |   |     |        |        |        |      |        |      |
| ANISOU | 1716 | CA   | LEU | A | 126 | 8072   | 4002   | 8443   | 1312 | 3140   | 196  |
| ATOM   | 1717 | C    | LEU | A | 126 | 24.474 | 24.073 | 3.363  | 1.00 | 58.79  |      |
| C      |      |      |     |   |     |        |        |        |      |        |      |
| ANISOU | 1717 | C    | LEU | A | 126 | 8662   | 4201   | 9473   | 1223 | 3515   | 94   |
| ATOM   | 1718 | O    | LEU | A | 126 | 24.145 | 24.947 | 4.168  | 1.00 | 57.92  |      |
| O      |      |      |     |   |     |        |        |        |      |        |      |
| ANISOU | 1718 | O    | LEU | A | 126 | 8462   | 4094   | 9450   | 1237 | 3407   | 6    |
| ATOM   | 1719 | CB   | LEU | A | 126 | 24.019 | 21.731 | 4.219  | 1.00 | 51.81  |      |
| C      |      |      |     |   |     |        |        |        |      |        |      |
| ANISOU | 1719 | CB   | LEU | A | 126 | 7390   | 3953   | 8342   | 1136 | 2807   | 19   |

|        |      |      |     |   |     |        |        |       |      |       |      |
|--------|------|------|-----|---|-----|--------|--------|-------|------|-------|------|
| ATOM C | 1720 | CG   | LEU | A | 126 | 23.067 | 20.525 | 4.361 | 1.00 | 54.14 |      |
| ANISOU | 1720 | CG   | LEU | A | 126 | 7653   | 4659   | 8259  | 1202 | 2419  | 90   |
| ATOM C | 1721 | CD1  | LEU | A | 126 | 23.730 | 19.397 | 5.133 | 1.00 | 53.19 |      |
| ANISOU | 1721 | CD1  | LEU | A | 126 | 7219   | 4668   | 8325  | 1028 | 2183  | -59  |
| ATOM C | 1722 | CD2  | LEU | A | 126 | 21.740 | 20.914 | 5.018 | 1.00 | 54.82 |      |
| ANISOU | 1722 | CD2  | LEU | A | 126 | 7758   | 4986   | 8086  | 1336 | 2159  | 117  |
| ATOM H | 1723 | H    | LEU | A | 126 | 24.108 | 21.517 | 1.646 | 1.00 | 0.00  |      |
| ATOM H | 1724 | HA   | LEU | A | 126 | 22.583 | 23.122 | 3.490 | 1.00 | 0.00  |      |
| ATOM H | 1725 | HB3  | LEU | A | 126 | 24.181 | 22.178 | 5.200 | 1.00 | 0.00  |      |
| ATOM H | 1726 | HB2  | LEU | A | 126 | 25.015 | 21.373 | 3.958 | 1.00 | 0.00  |      |
| ATOM H | 1727 | HG   | LEU | A | 126 | 22.846 | 20.157 | 3.359 | 1.00 | 0.00  |      |
| ATOM H | 1728 | HD11 | LEU | A | 126 | 23.038 | 18.559 | 5.219 | 1.00 | 0.00  |      |
| ATOM H | 1729 | HD12 | LEU | A | 126 | 24.628 | 19.074 | 4.606 | 1.00 | 0.00  |      |
| ATOM H | 1730 | HD13 | LEU | A | 126 | 24.001 | 19.748 | 6.129 | 1.00 | 0.00  |      |
| ATOM H | 1731 | HD21 | LEU | A | 126 | 21.102 | 20.034 | 5.097 | 1.00 | 0.00  |      |
| ATOM H | 1732 | HD22 | LEU | A | 126 | 21.931 | 21.315 | 6.013 | 1.00 | 0.00  |      |
| ATOM H | 1733 | HD23 | LEU | A | 126 | 21.242 | 21.670 | 4.412 | 1.00 | 0.00  |      |
| ATOM N | 1734 | N    | LEU | A | 127 | 25.574 | 24.171 | 2.576 | 1.00 | 56.60 |      |
| ANISOU | 1734 | N    | LEU | A | 127 | 8479   | 3545   | 9481  | 1129 | 3990  | 95   |
| ATOM C | 1735 | CA   | LEU | A | 127 | 26.436 | 25.361 | 2.580 | 1.00 | 59.39 |      |
| ANISOU | 1735 | CA   | LEU | A | 127 | 8818   | 3445   | 10301 | 1031 | 4432  | -7   |
| ATOM C | 1736 | C    | LEU | A | 127 | 25.658 | 26.554 | 2.013 | 1.00 | 63.04 |      |
| ANISOU | 1736 | C    | LEU | A | 127 | 9740   | 3752   | 10459 | 1244 | 4649  | 185  |
| ATOM O | 1737 | O    | LEU | A | 127 | 25.764 | 27.658 | 2.557 | 1.00 | 62.73 |      |
| ANISOU | 1737 | O    | LEU | A | 127 | 9633   | 3526   | 10675 | 1216 | 4753  | 89   |
| ATOM C | 1738 | CB   | LEU | A | 127 | 27.760 | 25.134 | 1.803 | 1.00 | 62.43 |      |
| ANISOU | 1738 | CB   | LEU | A | 127 | 9180   | 3421   | 11119 | 868  | 4964  | -62  |
| ATOM C | 1739 | CG   | LEU | A | 127 | 28.674 | 26.362 | 1.590 | 1.00 | 71.48 |      |
| ANISOU | 1739 | CG   | LEU | A | 127 | 10293  | 4024   | 12842 | 742  | 5521  | -184 |
| ATOM C | 1740 | CD1  | LEU | A | 127 | 29.178 | 26.946 | 2.914 | 1.00 | 72.19 |      |
| ANISOU | 1740 | CD1  | LEU | A | 127 | 9803   | 4072   | 13554 | 545  | 5261  | -524 |
| ATOM C | 1741 | CD2  | LEU | A | 127 | 29.831 | 26.037 | 0.678 | 1.00 | 76.28 |      |
| ANISOU | 1741 | CD2  | LEU | A | 127 | 11044  | 4194   | 13744 | 639  | 6180  | -160 |
| ATOM H | 1742 | H    | LEU | A | 127 | 25.824 | 23.410 | 1.961 | 1.00 | 0.00  |      |

|        |      |      |     |   |     |        |        |        |      |          |
|--------|------|------|-----|---|-----|--------|--------|--------|------|----------|
| ATOM   | 1743 | HA   | LEU | A | 127 | 26.690 | 25.588 | 3.616  | 1.00 | 0.00     |
| H      |      |      |     |   |     |        |        |        |      |          |
| ATOM   | 1744 | HB3  | LEU | A | 127 | 27.535 | 24.683 | 0.837  | 1.00 | 0.00     |
| H      |      |      |     |   |     |        |        |        |      |          |
| ATOM   | 1745 | HB2  | LEU | A | 127 | 28.330 | 24.343 | 2.291  | 1.00 | 0.00     |
| H      |      |      |     |   |     |        |        |        |      |          |
| ATOM   | 1746 | HG   | LEU | A | 127 | 28.078 | 27.132 | 1.100  | 1.00 | 0.00     |
| H      |      |      |     |   |     |        |        |        |      |          |
| ATOM   | 1747 | HD11 | LEU | A | 127 | 29.816 | 27.807 | 2.713  | 1.00 | 0.00     |
| H      |      |      |     |   |     |        |        |        |      |          |
| ATOM   | 1748 | HD12 | LEU | A | 127 | 28.328 | 27.258 | 3.521  | 1.00 | 0.00     |
| H      |      |      |     |   |     |        |        |        |      |          |
| ATOM   | 1749 | HD13 | LEU | A | 127 | 29.749 | 26.189 | 3.452  | 1.00 | 0.00     |
| H      |      |      |     |   |     |        |        |        |      |          |
| ATOM   | 1750 | HD21 | LEU | A | 127 | 30.453 | 26.923 | 0.550  | 1.00 | 0.00     |
| H      |      |      |     |   |     |        |        |        |      |          |
| ATOM   | 1751 | HD22 | LEU | A | 127 | 30.426 | 25.236 | 1.116  | 1.00 | 0.00     |
| H      |      |      |     |   |     |        |        |        |      |          |
| ATOM   | 1752 | HD23 | LEU | A | 127 | 29.451 | 25.717 | -0.292 | 1.00 | 0.00     |
| H      |      |      |     |   |     |        |        |        |      |          |
| ATOM   | 1753 | N    | ALA | A | 128 | 24.854 | 26.326 | 0.947  | 1.00 | 59.94    |
| N      |      |      |     |   |     |        |        |        |      |          |
| ANISOU | 1753 | N    | ALA | A | 128 | 9822   | 3431   | 9520   | 1473 | 4669 443 |
| ATOM   | 1754 | CA   | ALA | A | 128 | 24.014 | 27.373 | 0.347  | 1.00 | 62.76    |
| C      |      |      |     |   |     |        |        |        |      |          |
| ANISOU | 1754 | CA   | ALA | A | 128 | 10670  | 3650   | 9527   | 1733 | 4782 643 |
| ATOM   | 1755 | C    | ALA | A | 128 | 22.949 | 27.847 | 1.347  | 1.00 | 65.05    |
| C      |      |      |     |   |     |        |        |        |      |          |
| ANISOU | 1755 | C    | ALA | A | 128 | 10770  | 4250   | 9697   | 1843 | 4323 598 |
| ATOM   | 1756 | O    | ALA | A | 128 | 22.639 | 29.033 | 1.382  | 1.00 | 66.03    |
| O      |      |      |     |   |     |        |        |        |      |          |
| ANISOU | 1756 | O    | ALA | A | 128 | 11091  | 4189   | 9806   | 1970 | 4448 649 |
| ATOM   | 1757 | CB   | ALA | A | 128 | 23.361 | 26.867 | -0.931 | 1.00 | 64.57    |
| C      |      |      |     |   |     |        |        |        |      |          |
| ANISOU | 1757 | CB   | ALA | A | 128 | 11434  | 3906   | 9193   | 1971 | 4769 889 |
| ATOM   | 1758 | H    | ALA | A | 128 | 24.815 | 25.406 | 0.532  | 1.00 | 0.00     |
| H      |      |      |     |   |     |        |        |        |      |          |
| ATOM   | 1759 | HA   | ALA | A | 128 | 24.650 | 28.221 | 0.095  | 1.00 | 0.00     |
| H      |      |      |     |   |     |        |        |        |      |          |
| ATOM   | 1760 | HB1  | ALA | A | 128 | 22.743 | 27.656 | -1.361 | 1.00 | 0.00     |
| H      |      |      |     |   |     |        |        |        |      |          |
| ATOM   | 1761 | HB2  | ALA | A | 128 | 24.133 | 26.581 | -1.645 | 1.00 | 0.00     |
| H      |      |      |     |   |     |        |        |        |      |          |
| ATOM   | 1762 | HB3  | ALA | A | 128 | 22.738 | 26.002 | -0.704 | 1.00 | 0.00     |
| H      |      |      |     |   |     |        |        |        |      |          |
| ATOM   | 1763 | N    | LEU | A | 129 | 22.443 | 26.927 | 2.199  | 1.00 | 59.30    |
| N      |      |      |     |   |     |        |        |        |      |          |
| ANISOU | 1763 | N    | LEU | A | 129 | 9666   | 3957   | 8907   | 1787 | 3837 495 |
| ATOM   | 1764 | CA   | LEU | A | 129 | 21.476 | 27.228 | 3.255  | 1.00 | 57.53    |
| C      |      |      |     |   |     |        |        |        |      |          |
| ANISOU | 1764 | CA   | LEU | A | 129 | 9226   | 4025   | 8607   | 1853 | 3447 420 |
| ATOM   | 1765 | C    | LEU | A | 129 | 22.139 | 28.080 | 4.345  | 1.00 | 60.49    |
| C      |      |      |     |   |     |        |        |        |      |          |
| ANISOU | 1765 | C    | LEU | A | 129 | 9343   | 4230   | 9409   | 1683 | 3547 206 |
| ATOM   | 1766 | O    | LEU | A | 129 | 21.563 | 29.085 | 4.768  | 1.00 | 59.23    |
| O      |      |      |     |   |     |        |        |        |      |          |
| ANISOU | 1766 | O    | LEU | A | 129 | 9245   | 4027   | 9234   | 1789 | 3532 197 |

|        |      |      |     |   |     |        |        |       |      |       |      |
|--------|------|------|-----|---|-----|--------|--------|-------|------|-------|------|
| ATOM C | 1767 | CB   | LEU | A | 129 | 20.938 | 25.933 | 3.879 | 1.00 | 54.93 |      |
| ANISOU | 1767 | CB   | LEU | A | 129 | 8596   | 4127   | 8147  | 1790 | 3012  | 352  |
| ATOM C | 1768 | CG   | LEU | A | 129 | 19.420 | 25.760 | 4.009 | 1.00 | 59.36 |      |
| ANISOU | 1768 | CG   | LEU | A | 129 | 9172   | 5017   | 8366  | 1991 | 2648  | 431  |
| ATOM C | 1769 | CD1  | LEU | A | 129 | 19.101 | 24.514 | 4.811 | 1.00 | 57.67 |      |
| ANISOU | 1769 | CD1  | LEU | A | 129 | 8674   | 5158   | 8081  | 1882 | 2324  | 356  |
| ATOM C | 1770 | CD2  | LEU | A | 129 | 18.737 | 26.968 | 4.649 | 1.00 | 62.36 |      |
| ANISOU | 1770 | CD2  | LEU | A | 129 | 9484   | 5407   | 8804  | 2073 | 2583  | 365  |
| ATOM H | 1771 | H    | LEU | A | 129 | 22.731 | 25.961 | 2.128 | 1.00 | 0.00  |      |
| ATOM H | 1772 | HA   | LEU | A | 129 | 20.644 | 27.787 | 2.825 | 1.00 | 0.00  |      |
| ATOM H | 1773 | HB3  | LEU | A | 129 | 21.398 | 25.791 | 4.857 | 1.00 | 0.00  |      |
| ATOM H | 1774 | HB2  | LEU | A | 129 | 21.349 | 25.080 | 3.339 | 1.00 | 0.00  |      |
| ATOM H | 1775 | HG   | LEU | A | 129 | 19.008 | 25.631 | 3.008 | 1.00 | 0.00  |      |
| ATOM H | 1776 | HD11 | LEU | A | 129 | 18.020 | 24.403 | 4.896 | 1.00 | 0.00  |      |
| ATOM H | 1777 | HD12 | LEU | A | 129 | 19.517 | 23.641 | 4.308 | 1.00 | 0.00  |      |
| ATOM H | 1778 | HD13 | LEU | A | 129 | 19.536 | 24.601 | 5.807 | 1.00 | 0.00  |      |
| ATOM H | 1779 | HD21 | LEU | A | 129 | 17.664 | 26.787 | 4.714 | 1.00 | 0.00  |      |
| ATOM H | 1780 | HD22 | LEU | A | 129 | 19.140 | 27.126 | 5.649 | 1.00 | 0.00  |      |
| ATOM H | 1781 | HD23 | LEU | A | 129 | 18.919 | 27.854 | 4.040 | 1.00 | 0.00  |      |
| ATOM N | 1782 | N    | LYS | A | 130 | 23.345 | 27.668 | 4.795 | 1.00 | 57.33 |      |
| ANISOU | 1782 | N    | LYS | A | 130 | 8652   | 3717   | 9415  | 1431 | 3624  | 16   |
| ATOM C | 1783 | CA   | LYS | A | 130 | 24.164 | 28.354 | 5.799 | 1.00 | 58.26 |      |
| ANISOU | 1783 | CA   | LYS | A | 130 | 8495   | 3633   | 10009 | 1251 | 3664  | -240 |
| ATOM C | 1784 | C    | LYS | A | 130 | 24.432 | 29.788 | 5.353 | 1.00 | 64.60 |      |
| ANISOU | 1784 | C    | LYS | A | 130 | 9520   | 4013   | 11014 | 1292 | 4108  | -208 |
| ATOM O | 1785 | O    | LYS | A | 130 | 24.208 | 30.721 | 6.129 | 1.00 | 64.72 |      |
| ANISOU | 1785 | O    | LYS | A | 130 | 9477   | 3970   | 11143 | 1300 | 4046  | -323 |
| ATOM C | 1786 | CB   | LYS | A | 130 | 25.499 | 27.604 | 5.985 | 1.00 | 61.17 |      |
| ANISOU | 1786 | CB   | LYS | A | 130 | 8533   | 3875   | 10833 | 1006 | 3691  | -438 |
| ATOM C | 1787 | CG   | LYS | A | 130 | 25.614 | 26.800 | 7.266 | 0.00 | 73.78 |      |
| ANISOU | 1787 | CG   | LYS | A | 130 | 9800   | 5777   | 12457 | 904  | 3173  | -631 |
| ATOM C | 1788 | CD   | LYS | A | 130 | 26.989 | 26.151 | 7.360 | 0.00 | 85.19 |      |
| ANISOU | 1788 | CD   | LYS | A | 130 | 10901  | 7024   | 14443 | 688  | 3176  | -856 |
| ATOM C | 1789 | CE   | LYS | A | 130 | 27.142 | 25.274 | 8.575 | 0.00 | 94.87 |      |

|        |      |     |     |   |     |        |        |        |            |       |       |
|--------|------|-----|-----|---|-----|--------|--------|--------|------------|-------|-------|
| ANISOU | 1789 | CE  | LYS | A | 130 | 11867  | 8505   | 15674  | 615        | 2624  | -1046 |
| ATOM   | 1790 | NZ  | LYS | A | 130 | 28.530 | 24.761 | 8.709  | 0.00105.80 |       |       |
| N1+    |      |     |     |   |     |        |        |        |            |       |       |
| ANISOU | 1790 | NZ  | LYS | A | 130 | 12887  | 9645   | 17668  | 429        | 2571  | -1302 |
| ATOM   | 1791 | H   | LYS | A | 130 | 23.755 | 26.818 | 4.435  | 1.00       | 0.00  |       |
| H      |      |     |     |   |     |        |        |        |            |       |       |
| ATOM   | 1792 | HA  | LYS | A | 130 | 23.628 | 28.369 | 6.748  | 1.00       | 0.00  |       |
| H      |      |     |     |   |     |        |        |        |            |       |       |
| ATOM   | 1793 | HB3 | LYS | A | 130 | 26.323 | 28.316 | 5.931  | 1.00       | 0.00  |       |
| H      |      |     |     |   |     |        |        |        |            |       |       |
| ATOM   | 1794 | HB2 | LYS | A | 130 | 25.665 | 26.947 | 5.131  | 1.00       | 0.00  |       |
| H      |      |     |     |   |     |        |        |        |            |       |       |
| ATOM   | 1795 | HG3 | LYS | A | 130 | 24.846 | 26.027 | 7.279  | 1.00       | 0.00  |       |
| H      |      |     |     |   |     |        |        |        |            |       |       |
| ATOM   | 1796 | HG2 | LYS | A | 130 | 25.464 | 27.458 | 8.122  | 1.00       | 0.00  |       |
| H      |      |     |     |   |     |        |        |        |            |       |       |
| ATOM   | 1797 | HD3 | LYS | A | 130 | 27.755 | 26.926 | 7.374  | 1.00       | 0.00  |       |
| H      |      |     |     |   |     |        |        |        |            |       |       |
| ATOM   | 1798 | HD2 | LYS | A | 130 | 27.173 | 25.561 | 6.462  | 1.00       | 0.00  |       |
| H      |      |     |     |   |     |        |        |        |            |       |       |
| ATOM   | 1799 | HE3 | LYS | A | 130 | 26.450 | 24.435 | 8.506  | 1.00       | 0.00  |       |
| H      |      |     |     |   |     |        |        |        |            |       |       |
| ATOM   | 1800 | HE2 | LYS | A | 130 | 26.877 | 25.841 | 9.467  | 1.00       | 0.00  |       |
| H      |      |     |     |   |     |        |        |        |            |       |       |
| ATOM   | 1801 | HZ1 | LYS | A | 130 | 28.622 | 23.898 | 8.192  | 1.00       | 0.00  |       |
| H      |      |     |     |   |     |        |        |        |            |       |       |
| ATOM   | 1802 | HZ2 | LYS | A | 130 | 29.178 | 25.443 | 8.342  | 1.00       | 0.00  |       |
| H      |      |     |     |   |     |        |        |        |            |       |       |
| ATOM   | 1803 | HZ3 | LYS | A | 130 | 28.735 | 24.593 | 9.684  | 1.00       | 0.00  |       |
| H      |      |     |     |   |     |        |        |        |            |       |       |
| ATOM   | 1804 | N   | ARG | A | 131 | 24.852 | 29.965 | 4.079  | 1.00       | 62.76 |       |
| N      |      |     |     |   |     |        |        |        |            |       |       |
| ANISOU | 1804 | N   | ARG | A | 131 | 9594   | 3465   | 10788  | 1330       | 4579  | -43   |
| ATOM   | 1805 | CA  | ARG | A | 131 | 25.133 | 31.279 | 3.488  | 1.00       | 66.10 |       |
| C      |      |     |     |   |     |        |        |        |            |       |       |
| ANISOU | 1805 | CA  | ARG | A | 131 | 10322  | 3421   | 11374  | 1378       | 5094  | 27    |
| ATOM   | 1806 | C   | ARG | A | 131 | 23.894 | 32.183 | 3.452  | 1.00       | 70.23 |       |
| C      |      |     |     |   |     |        |        |        |            |       |       |
| ANISOU | 1806 | C   | ARG | A | 131 | 11171  | 4002   | 11510  | 1647       | 5000  | 193   |
| ATOM   | 1807 | O   | ARG | A | 131 | 24.009 | 33.375 | 3.735  | 1.00       | 70.86 |       |
| O      |      |     |     |   |     |        |        |        |            |       |       |
| ANISOU | 1807 | O   | ARG | A | 131 | 11317  | 3792   | 11814  | 1648       | 5235  | 139   |
| ATOM   | 1808 | CB  | ARG | A | 131 | 25.753 | 31.134 | 2.092  | 1.00       | 69.10 |       |
| C      |      |     |     |   |     |        |        |        |            |       |       |
| ANISOU | 1808 | CB  | ARG | A | 131 | 11049  | 3440   | 11764  | 1376       | 5647  | 187   |
| ATOM   | 1809 | CG  | ARG | A | 131 | 27.224 | 30.745 | 2.150  | 1.00       | 81.95 |       |
| C      |      |     |     |   |     |        |        |        |            |       |       |
| ANISOU | 1809 | CG  | ARG | A | 131 | 12308  | 4781   | 14048  | 1073       | 5956  | -44   |
| ATOM   | 1810 | CD  | ARG | A | 131 | 27.796 | 30.458 | 0.782  | 1.00       | 96.67 |       |
| C      |      |     |     |   |     |        |        |        |            |       |       |
| ANISOU | 1810 | CD  | ARG | A | 131 | 14537  | 6286   | 15908  | 1066       | 6557  | 113   |
| ATOM   | 1811 | NE  | ARG | A | 131 | 29.227 | 30.159 | 0.857  | 1.00108.02 |       |       |
| N      |      |     |     |   |     |        |        |        |            |       |       |
| ANISOU | 1811 | NE  | ARG | A | 131 | 15555  | 7416   | 18073  | 771        | 6888  | -136  |
| ATOM   | 1812 | CZ  | ARG | A | 131 | 29.930 | 29.590 | -0.117 | 1.00124.84 |       |       |
| C      |      |     |     |   |     |        |        |        |            |       |       |
| ANISOU | 1812 | CZ  | ARG | A | 131 | 17831  | 9301   | 20301  | 701        | 7346  | -76   |

|          |      |      |     |   |     |        |        |        |            |       |      |
|----------|------|------|-----|---|-----|--------|--------|--------|------------|-------|------|
| ATOM N   | 1813 | NH1  | ARG | A | 131 | 29.339 | 29.235 | -1.252 | 1.00112.20 |       |      |
| ANISOU   | 1813 | NH1  | ARG | A | 131 | 16834  | 7743   | 18053  | 909        | 7490  | 227  |
| ATOM N1+ | 1814 | NH2  | ARG | A | 131 | 31.226 | 29.359 | 0.039  | 1.00114.14 |       |      |
| ANISOU   | 1814 | NH2  | ARG | A | 131 | 16014  | 7644   | 19711  | 431        | 7639  | -339 |
| ATOM H   | 1815 | H    | ARG | A | 131 | 24.989 | 29.166 | 3.477  | 1.00       | 0.00  |      |
| ATOM H   | 1816 | HA   | ARG | A | 131 | 25.873 | 31.768 | 4.122  | 1.00       | 0.00  |      |
| ATOM H   | 1817 | HB3  | ARG | A | 131 | 25.648 | 32.073 | 1.549  | 1.00       | 0.00  |      |
| ATOM H   | 1818 | HB2  | ARG | A | 131 | 25.201 | 30.383 | 1.527  | 1.00       | 0.00  |      |
| ATOM H   | 1819 | HG3  | ARG | A | 131 | 27.342 | 29.866 | 2.784  | 1.00       | 0.00  |      |
| ATOM H   | 1820 | HG2  | ARG | A | 131 | 27.793 | 31.547 | 2.620  | 1.00       | 0.00  |      |
| ATOM H   | 1821 | HD3  | ARG | A | 131 | 27.639 | 31.321 | 0.135  | 1.00       | 0.00  |      |
| ATOM H   | 1822 | HD2  | ARG | A | 131 | 27.271 | 29.611 | 0.340  | 1.00       | 0.00  |      |
| ATOM H   | 1823 | HE   | ARG | A | 131 | 29.680 | 30.416 | 1.723  | 1.00       | 0.00  |      |
| ATOM H   | 1824 | HH12 | ARG | A | 131 | 29.878 | 28.803 | -1.989 | 1.00       | 0.00  |      |
| ATOM H   | 1825 | HH11 | ARG | A | 131 | 28.350 | 29.397 | -1.379 | 1.00       | 0.00  |      |
| ATOM H   | 1826 | HH22 | ARG | A | 131 | 31.755 | 28.926 | -0.705 | 1.00       | 0.00  |      |
| ATOM H   | 1827 | HH21 | ARG | A | 131 | 31.684 | 29.616 | 0.902  | 1.00       | 0.00  |      |
| ATOM N   | 1828 | N    | SER | A | 132 | 22.712 | 31.610 | 3.148  | 1.00       | 65.99 |      |
| ANISOU   | 1828 | N    | SER | A | 132 | 10797  | 3829   | 10446  | 1873       | 4638  | 368  |
| ATOM C   | 1829 | CA   | SER | A | 132 | 21.449 | 32.360 | 3.102  | 1.00       | 66.48 |      |
| ANISOU   | 1829 | CA   | SER | A | 132 | 11112  | 3965   | 10184  | 2156       | 4478  | 507  |
| ATOM C   | 1830 | C    | SER | A | 132 | 20.957 | 32.781 | 4.492  | 1.00       | 69.64 |      |
| ANISOU   | 1830 | C    | SER | A | 132 | 11167  | 4577   | 10716  | 2117       | 4175  | 315  |
| ATOM O   | 1831 | O    | SER | A | 132 | 20.095 | 33.648 | 4.586  | 1.00       | 69.62 |      |
| ANISOU   | 1831 | O    | SER | A | 132 | 11317  | 4556   | 10579  | 2320       | 4122  | 381  |
| ATOM C   | 1832 | CB   | SER | A | 132 | 20.370 | 31.554 | 2.385  | 1.00       | 69.72 |      |
| ANISOU   | 1832 | CB   | SER | A | 132 | 11752  | 4655   | 10082  | 2405       | 4166  | 711  |
| ATOM O   | 1833 | OG   | SER | A | 132 | 19.867 | 30.506 | 3.198  | 1.00       | 77.03 |      |
| ANISOU   | 1833 | OG   | SER | A | 132 | 12293  | 6037   | 10938  | 2326       | 3723  | 607  |
| ATOM H   | 1834 | H    | SER | A | 132 | 22.668 | 30.623 | 2.939  | 1.00       | 0.00  |      |
| ATOM H   | 1835 | HA   | SER | A | 132 | 21.624 | 33.267 | 2.524  | 1.00       | 0.00  |      |
| ATOM H   | 1836 | HB3  | SER | A | 132 | 20.781 | 31.135 | 1.466  | 1.00       | 0.00  |      |

|        |      |     |       |     |        |        |       |      |        |      |
|--------|------|-----|-------|-----|--------|--------|-------|------|--------|------|
| ATOM H | 1837 | HB2 | SER A | 132 | 19.552 | 32.216 | 2.100 | 1.00 | 0.00   |      |
| ATOM H | 1838 | HG  | SER A | 132 | 20.582 | 29.910 | 3.432 | 1.00 | 0.00   |      |
| ATOM N | 1839 | N   | MET A | 133 | 21.497 | 32.172 | 5.561 | 1.00 | 65.75  |      |
| ANISOU | 1839 | N   | MET A | 133 | 10251  | 4254   | 10477 | 1873 | 3977   | 74   |
| ATOM C | 1840 | CA  | MET A | 133 | 21.126 | 32.486 | 6.943 | 1.00 | 65.48  |      |
| ANISOU | 1840 | CA  | MET A | 133 | 9965   | 4387   | 10528 | 1823 | 3706   | -126 |
| ATOM C | 1841 | C   | MET A | 133 | 21.851 | 33.720 | 7.490 | 1.00 | 73.77  |      |
| ANISOU | 1841 | C   | MET A | 133 | 10963  | 5072   | 11994 | 1701 | 3949   | -314 |
| ATOM O | 1842 | O   | MET A | 133 | 21.546 | 34.163 | 8.598 | 1.00 | 73.81  |      |
| ANISOU | 1842 | O   | MET A | 133 | 10841  | 5150   | 12053 | 1679 | 3765   | -486 |
| ATOM C | 1843 | CB  | MET A | 133 | 21.307 | 31.262 | 7.855 | 1.00 | 65.58  |      |
| ANISOU | 1843 | CB  | MET A | 133 | 9650   | 4735   | 10532 | 1660 | 3331   | -287 |
| ATOM C | 1844 | CG  | MET A | 133 | 20.213 | 30.231 | 7.693 | 1.00 | 67.24  |      |
| ANISOU | 1844 | CG  | MET A | 133 | 9869   | 5347   | 10333 | 1802 | 3031   | -151 |
| ATOM S | 1845 | SD  | MET A | 133 | 20.640 | 28.667 | 8.489 | 1.00 | 69.49  |      |
| ANISOU | 1845 | SD  | MET A | 133 | 9858   | 5939   | 10605 | 1602 | 2697   | -285 |
| ATOM C | 1846 | CE  | MET A | 133 | 19.128 | 27.785 | 8.292 | 1.00 | 64.49  |      |
| ANISOU | 1846 | CE  | MET A | 133 | 9247   | 5713   | 9544  | 1787 | 2423   | -141 |
| ATOM H | 1847 | H   | MET A | 133 | 22.198 | 31.456 | 5.434 | 1.00 | 0.00   |      |
| ATOM H | 1848 | HA  | MET A | 133 | 20.062 | 32.721 | 6.938 | 1.00 | 0.00   |      |
| ATOM H | 1849 | HB3 | MET A | 133 | 21.346 | 31.588 | 8.894 | 1.00 | 0.00   |      |
| ATOM H | 1850 | HB2 | MET A | 133 | 22.273 | 30.800 | 7.653 | 1.00 | 0.00   |      |
| ATOM H | 1851 | HG3 | MET A | 133 | 20.030 | 30.060 | 6.632 | 1.00 | 0.00   |      |
| ATOM H | 1852 | HG2 | MET A | 133 | 19.287 | 30.615 | 8.121 | 1.00 | 0.00   |      |
| ATOM H | 1853 | HE1 | MET A | 133 | 19.225 | 26.793 | 8.733 | 1.00 | 0.00   |      |
| ATOM H | 1854 | HE2 | MET A | 133 | 18.324 | 28.326 | 8.790 | 1.00 | 0.00   |      |
| ATOM H | 1855 | HE3 | MET A | 133 | 18.898 | 27.689 | 7.231 | 1.00 | 0.00   |      |
| ATOM N | 1856 | N   | SER A | 134 | 22.767 | 34.305 | 6.696 | 1.00 | 73.77  |      |
| ANISOU | 1856 | N   | SER A | 134 | 11088  | 4652   | 12291 | 1624 | 4392   | -289 |
| ATOM C | 1857 | CA  | SER A | 134 | 23.511 | 35.506 | 7.076 | 1.00 | 102.68 |      |
| ANISOU | 1857 | CA  | SER A | 134 | 14690  | 7899   | 16426 | 1491 | 4686   | -475 |
| ATOM C | 1858 | C   | SER A | 134 | 22.649 | 36.771 | 6.965 | 1.00 | 118.30 |      |
| ANISOU | 1858 | C   | SER A | 134 | 16962  | 9723   | 18264 | 1702 | 4837   | -365 |
| ATOM O | 1859 | O   | SER A | 134 | 21.603 | 36.770 | 6.312 | 1.00 | 68.62  |      |



|               |    |     |      |     |        |        |       |      |      |
|---------------|----|-----|------|-----|--------|--------|-------|------|------|
| HETATM<br>O   | 7  | O1  | CP10 | 900 | 5.827  | -1.808 | 6.573 | 1.00 | 0.00 |
| HETATM<br>C   | 8  | C7  | CP10 | 900 | 6.737  | -1.190 | 7.489 | 1.00 | 0.00 |
| HETATM<br>O   | 9  | O2  | CP10 | 900 | 4.846  | -5.161 | 3.312 | 1.00 | 0.00 |
| HETATM<br>C   | 10 | C8  | CP10 | 900 | 5.243  | -6.144 | 2.363 | 1.00 | 0.00 |
| HETATM<br>C   | 11 | C9  | CP10 | 900 | 3.867  | -3.265 | 5.144 | 1.00 | 0.00 |
| HETATM<br>N1+ | 12 | N1  | CP10 | 900 | 3.096  | -3.019 | 3.828 | 1.00 | 0.00 |
| HETATM<br>C   | 13 | C10 | CP10 | 900 | 1.568  | -3.046 | 4.032 | 1.00 | 0.00 |
| HETATM<br>C   | 14 | C11 | CP10 | 900 | 3.539  | -1.734 | 3.103 | 1.00 | 0.00 |
| HETATM<br>C   | 15 | C12 | CP10 | 900 | 9.577  | -4.285 | 4.584 | 1.00 | 0.00 |
| HETATM<br>C   | 16 | C13 | CP10 | 900 | 10.435 | -3.242 | 4.574 | 1.00 | 0.00 |
| HETATM<br>N   | 17 | N2  | CP10 | 900 | 11.804 | -3.277 | 4.584 | 1.00 | 0.00 |
| HETATM<br>C   | 18 | C14 | CP10 | 900 | 12.482 | -4.463 | 4.744 | 1.00 | 0.00 |
| HETATM<br>C   | 19 | C15 | CP10 | 900 | 11.609 | -5.708 | 4.625 | 1.00 | 0.00 |
| HETATM<br>C   | 20 | C16 | CP10 | 900 | 10.199 | -5.633 | 4.593 | 1.00 | 0.00 |
| HETATM<br>C   | 21 | C17 | CP10 | 900 | 12.218 | -6.965 | 4.569 | 1.00 | 0.00 |
| HETATM<br>N   | 22 | N3  | CP10 | 900 | 11.510 | -8.120 | 4.490 | 1.00 | 0.00 |
| HETATM<br>C   | 23 | C18 | CP10 | 900 | 10.157 | -8.043 | 4.511 | 1.00 | 0.00 |
| HETATM<br>C   | 24 | C19 | CP10 | 900 | 9.471  | -6.833 | 4.572 | 1.00 | 0.00 |
| HETATM<br>O   | 25 | O3  | CP10 | 900 | 13.694 | -4.523 | 4.972 | 1.00 | 0.00 |
| HETATM<br>C   | 26 | C20 | CP10 | 900 | 12.588 | -2.036 | 4.568 | 1.00 | 0.00 |
| HETATM<br>H   | 27 | H1  | CP10 | 900 | 7.545  | -5.394 | 3.158 | 1.00 | 0.00 |
| HETATM<br>H   | 28 | H2  | CP10 | 900 | 8.384  | -2.539 | 6.173 | 1.00 | 0.00 |
| HETATM<br>H   | 29 | H3  | CP10 | 900 | 6.219  | -0.528 | 8.171 | 1.00 | 0.00 |
| HETATM<br>H   | 30 | H4  | CP10 | 900 | 7.466  | -0.571 | 6.971 | 1.00 | 0.00 |
| HETATM<br>H   | 31 | H5  | CP10 | 900 | 7.255  | -1.924 | 8.108 | 1.00 | 0.00 |
| HETATM<br>H   | 32 | H6  | CP10 | 900 | 5.823  | -6.945 | 2.824 | 1.00 | 0.00 |
| HETATM<br>H   | 33 | H7  | CP10 | 900 | 5.819  | -5.706 | 1.548 | 1.00 | 0.00 |
| HETATM<br>H   | 34 | H8  | CP10 | 900 | 4.355  | -6.598 | 1.927 | 1.00 | 0.00 |

|        |    |     |      |     |        |        |       |      |      |
|--------|----|-----|------|-----|--------|--------|-------|------|------|
| HETATM | 35 | H9  | CP10 | 900 | 3.638  | -2.400 | 5.772 | 1.00 | 0.00 |
| H      |    |     |      |     |        |        |       |      |      |
| HETATM | 36 | H10 | CP10 | 900 | 3.405  | -4.148 | 5.589 | 1.00 | 0.00 |
| H      |    |     |      |     |        |        |       |      |      |
| HETATM | 37 | H11 | CP10 | 900 | 1.311  | -4.013 | 4.469 | 1.00 | 0.00 |
| H      |    |     |      |     |        |        |       |      |      |
| HETATM | 38 | H12 | CP10 | 900 | 1.103  | -2.931 | 3.051 | 1.00 | 0.00 |
| H      |    |     |      |     |        |        |       |      |      |
| HETATM | 39 | H13 | CP10 | 900 | 1.300  | -2.222 | 4.695 | 1.00 | 0.00 |
| H      |    |     |      |     |        |        |       |      |      |
| HETATM | 40 | H14 | CP10 | 900 | 4.619  | -1.771 | 2.968 | 1.00 | 0.00 |
| H      |    |     |      |     |        |        |       |      |      |
| HETATM | 41 | H15 | CP10 | 900 | 3.253  | -0.878 | 3.719 | 1.00 | 0.00 |
| H      |    |     |      |     |        |        |       |      |      |
| HETATM | 42 | H16 | CP10 | 900 | 3.033  | -1.722 | 2.136 | 1.00 | 0.00 |
| H      |    |     |      |     |        |        |       |      |      |
| HETATM | 43 | H17 | CP10 | 900 | 10.087 | -2.217 | 4.575 | 1.00 | 0.00 |
| H      |    |     |      |     |        |        |       |      |      |
| HETATM | 44 | H18 | CP10 | 900 | 13.293 | -7.075 | 4.573 | 1.00 | 0.00 |
| H      |    |     |      |     |        |        |       |      |      |
| HETATM | 45 | H19 | CP10 | 900 | 9.620  | -8.980 | 4.495 | 1.00 | 0.00 |
| H      |    |     |      |     |        |        |       |      |      |
| HETATM | 46 | H20 | CP10 | 900 | 8.394  | -6.857 | 4.604 | 1.00 | 0.00 |
| H      |    |     |      |     |        |        |       |      |      |
| HETATM | 47 | H21 | CP10 | 900 | 13.659 | -2.185 | 4.413 | 1.00 | 0.00 |
| H      |    |     |      |     |        |        |       |      |      |
| HETATM | 48 | H22 | CP10 | 900 | 12.459 | -1.504 | 5.510 | 1.00 | 0.00 |
| H      |    |     |      |     |        |        |       |      |      |
| HETATM | 49 | H23 | CP10 | 900 | 12.236 | -1.383 | 3.768 | 1.00 | 0.00 |
| H      |    |     |      |     |        |        |       |      |      |
| HETATM | 50 | H24 | CP10 | 900 | 3.347  | -3.801 | 3.233 | 1.00 | 0.00 |
| H      |    |     |      |     |        |        |       |      |      |
| CONECT | 1  | 2   | 6    | 7   |        |        |       |      |      |
| CONECT | 2  | 1   | 3    | 11  |        |        |       |      |      |
| CONECT | 3  | 2   | 4    | 9   |        |        |       |      |      |
| CONECT | 4  | 3   | 5    | 27  |        |        |       |      |      |
| CONECT | 5  | 4   | 6    | 15  |        |        |       |      |      |
| CONECT | 6  | 1   | 5    | 28  |        |        |       |      |      |
| CONECT | 7  | 1   | 8    |     |        |        |       |      |      |
| CONECT | 8  | 7   | 29   | 30  | 31     |        |       |      |      |
| CONECT | 9  | 3   | 10   |     |        |        |       |      |      |
| CONECT | 10 | 9   | 32   | 33  | 34     |        |       |      |      |
| CONECT | 11 | 2   | 12   | 35  | 36     |        |       |      |      |
| CONECT | 12 | 11  | 13   | 14  | 50     |        |       |      |      |
| CONECT | 13 | 12  | 37   | 38  | 39     |        |       |      |      |
| CONECT | 14 | 12  | 40   | 41  | 42     |        |       |      |      |
| CONECT | 15 | 5   | 20   | 16  |        |        |       |      |      |
| CONECT | 16 | 15  | 17   | 43  |        |        |       |      |      |
| CONECT | 17 | 16  | 18   | 26  |        |        |       |      |      |
| CONECT | 18 | 17  | 19   | 25  |        |        |       |      |      |
| CONECT | 19 | 18  | 20   | 21  |        |        |       |      |      |
| CONECT | 20 | 15  | 19   | 24  |        |        |       |      |      |
| CONECT | 21 | 19  | 22   | 44  |        |        |       |      |      |
| CONECT | 22 | 21  | 23   |     |        |        |       |      |      |
| CONECT | 23 | 22  | 24   | 45  |        |        |       |      |      |
| CONECT | 24 | 20  | 23   | 46  |        |        |       |      |      |
| CONECT | 25 | 18  |      |     |        |        |       |      |      |

|         |    |    |    |    |    |
|---------|----|----|----|----|----|
| CONNECT | 26 | 17 | 47 | 48 | 49 |
| CONNECT | 27 | 4  |    |    |    |
| CONNECT | 28 | 6  |    |    |    |
| CONNECT | 29 | 8  |    |    |    |
| CONNECT | 30 | 8  |    |    |    |
| CONNECT | 31 | 8  |    |    |    |
| CONNECT | 32 | 10 |    |    |    |
| CONNECT | 33 | 10 |    |    |    |
| CONNECT | 34 | 10 |    |    |    |
| CONNECT | 35 | 11 |    |    |    |
| CONNECT | 36 | 11 |    |    |    |
| CONNECT | 37 | 13 |    |    |    |
| CONNECT | 38 | 13 |    |    |    |
| CONNECT | 39 | 13 |    |    |    |
| CONNECT | 40 | 14 |    |    |    |
| CONNECT | 41 | 14 |    |    |    |
| CONNECT | 42 | 14 |    |    |    |
| CONNECT | 43 | 16 |    |    |    |
| CONNECT | 44 | 21 |    |    |    |
| CONNECT | 45 | 23 |    |    |    |
| CONNECT | 46 | 24 |    |    |    |
| CONNECT | 47 | 26 |    |    |    |
| CONNECT | 48 | 26 |    |    |    |
| CONNECT | 49 | 26 |    |    |    |
| CONNECT | 50 | 12 |    |    |    |

ENDMDL  
END

### 10a

REMARK 4 COMPLIES WITH FORMAT V. 3.0, 1-DEC-2006  
 REMARK 888  
 REMARK 888 WRITTEN BY MAESTRO (A PRODUCT OF SCHRODINGER, LLC)  
 TITLE LP-99  
 MODEL 1  
 HETATM 1 C1 CP11 900 8.219 -3.313 6.941 1.00 0.00  
 C  
 HETATM 2 C2 CP11 900 9.079 -4.318 6.171 1.00 0.00  
 C  
 HETATM 3 C3 CP11 900 8.872 -4.227 4.663 1.00 0.00  
 C  
 HETATM 4 C4 CP11 900 7.355 -4.323 4.276 1.00 0.00  
 C  
 HETATM 5 N1 CP11 900 6.434 -3.641 5.254 1.00 0.00  
 N  
 HETATM 6 C5 CP11 900 6.746 -3.292 6.541 1.00 0.00  
 C  
 HETATM 7 C6 CP11 900 5.083 -3.485 4.868 1.00 0.00  
 C  
 HETATM 8 C7 CP11 900 6.924 -5.732 3.809 1.00 0.00  
 C  
 HETATM 9 N2 CP11 900 9.395 -2.933 4.171 1.00 0.00  
 N  
 HETATM 10 C8 CP11 900 5.812 -5.863 2.968 1.00 0.00  
 C

|              |    |     |      |     |        |        |       |      |      |
|--------------|----|-----|------|-----|--------|--------|-------|------|------|
| HETATM<br>C  | 11 | C9  | CP11 | 900 | 5.370  | -7.120 | 2.562 | 1.00 | 0.00 |
| HETATM<br>C  | 12 | C10 | CP11 | 900 | 6.056  | -8.259 | 2.973 | 1.00 | 0.00 |
| HETATM<br>C  | 13 | C11 | CP11 | 900 | 7.190  | -8.148 | 3.771 | 1.00 | 0.00 |
| HETATM<br>C  | 14 | C12 | CP11 | 900 | 7.631  | -6.890 | 4.171 | 1.00 | 0.00 |
| HETATM<br>C1 | 15 | CL1 | CP11 | 900 | 5.509  | -9.816 | 2.474 | 1.00 | 0.00 |
| HETATM<br>S  | 16 | S1  | CP11 | 900 | 11.078 | -2.457 | 4.433 | 1.00 | 0.00 |
| HETATM<br>C  | 17 | C13 | CP11 | 900 | 12.082 | -4.050 | 4.390 | 1.00 | 0.00 |
| HETATM<br>C  | 18 | C14 | CP11 | 900 | 13.570 | -3.872 | 4.788 | 1.00 | 0.00 |
| HETATM<br>C  | 19 | C15 | CP11 | 900 | 13.955 | -2.633 | 5.622 | 1.00 | 0.00 |
| HETATM<br>C  | 20 | C16 | CP11 | 900 | 14.009 | -5.154 | 5.517 | 1.00 | 0.00 |
| HETATM<br>O  | 21 | O1  | CP11 | 900 | 11.154 | -1.877 | 5.771 | 1.00 | 0.00 |
| HETATM<br>O  | 22 | O2  | CP11 | 900 | 11.490 | -1.646 | 3.288 | 1.00 | 0.00 |
| HETATM<br>O  | 23 | O3  | CP11 | 900 | 5.917  | -2.933 | 7.371 | 1.00 | 0.00 |
| HETATM<br>C  | 24 | C17 | CP11 | 900 | 4.134  | -4.457 | 5.203 | 1.00 | 0.00 |
| HETATM<br>C  | 25 | C18 | CP11 | 900 | 2.785  | -4.304 | 4.839 | 1.00 | 0.00 |
| HETATM<br>C  | 26 | C19 | CP11 | 900 | 2.397  | -3.137 | 4.144 | 1.00 | 0.00 |
| HETATM<br>C  | 27 | C20 | CP11 | 900 | 3.348  | -2.157 | 3.835 | 1.00 | 0.00 |
| HETATM<br>C  | 28 | C21 | CP11 | 900 | 4.679  | -2.330 | 4.199 | 1.00 | 0.00 |
| HETATM<br>N  | 29 | N3  | CP11 | 900 | 1.792  | -5.289 | 5.146 | 1.00 | 0.00 |
| HETATM<br>C  | 30 | C22 | CP11 | 900 | 0.463  | -5.203 | 4.816 | 1.00 | 0.00 |
| HETATM<br>C  | 31 | C23 | CP11 | 900 | 0.105  | -3.988 | 4.107 | 1.00 | 0.00 |
| HETATM<br>C  | 32 | C24 | CP11 | 900 | 0.966  | -3.002 | 3.773 | 1.00 | 0.00 |
| HETATM<br>O  | 33 | O4  | CP11 | 900 | -0.396 | -6.050 | 5.071 | 1.00 | 0.00 |
| HETATM<br>C  | 34 | C25 | CP11 | 900 | 0.508  | -1.755 | 3.027 | 1.00 | 0.00 |
| HETATM<br>C  | 35 | C26 | CP11 | 900 | 2.226  | -6.496 | 5.876 | 1.00 | 0.00 |
| HETATM<br>H  | 36 | H1  | CP11 | 900 | 8.259  | -3.523 | 8.011 | 1.00 | 0.00 |
| HETATM<br>H  | 37 | H2  | CP11 | 900 | 8.590  | -2.295 | 6.813 | 1.00 | 0.00 |
| HETATM<br>H  | 38 | H3  | CP11 | 900 | 10.112 | -4.149 | 6.452 | 1.00 | 0.00 |

|        |    |     |      |     |        |        |       |      |      |
|--------|----|-----|------|-----|--------|--------|-------|------|------|
| HETATM | 39 | H4  | CP11 | 900 | 8.875  | -5.330 | 6.503 | 1.00 | 0.00 |
| H      |    |     |      |     |        |        |       |      |      |
| HETATM | 40 | H5  | CP11 | 900 | 9.418  | -5.009 | 4.135 | 1.00 | 0.00 |
| H      |    |     |      |     |        |        |       |      |      |
| HETATM | 41 | H6  | CP11 | 900 | 7.261  | -3.750 | 3.358 | 1.00 | 0.00 |
| H      |    |     |      |     |        |        |       |      |      |
| HETATM | 42 | H7  | CP11 | 900 | 8.797  | -2.189 | 4.547 | 1.00 | 0.00 |
| H      |    |     |      |     |        |        |       |      |      |
| HETATM | 43 | H8  | CP11 | 900 | 5.273  | -4.990 | 2.632 | 1.00 | 0.00 |
| H      |    |     |      |     |        |        |       |      |      |
| HETATM | 44 | H9  | CP11 | 900 | 4.500  | -7.208 | 1.927 | 1.00 | 0.00 |
| H      |    |     |      |     |        |        |       |      |      |
| HETATM | 45 | H10 | CP11 | 900 | 7.720  | -9.034 | 4.091 | 1.00 | 0.00 |
| H      |    |     |      |     |        |        |       |      |      |
| HETATM | 46 | H11 | CP11 | 900 | 8.499  | -6.847 | 4.809 | 1.00 | 0.00 |
| H      |    |     |      |     |        |        |       |      |      |
| HETATM | 47 | H12 | CP11 | 900 | 11.584 | -4.746 | 5.057 | 1.00 | 0.00 |
| H      |    |     |      |     |        |        |       |      |      |
| HETATM | 48 | H13 | CP11 | 900 | 11.979 | -4.466 | 3.388 | 1.00 | 0.00 |
| H      |    |     |      |     |        |        |       |      |      |
| HETATM | 49 | H14 | CP11 | 900 | 14.128 | -3.733 | 3.862 | 1.00 | 0.00 |
| H      |    |     |      |     |        |        |       |      |      |
| HETATM | 50 | H15 | CP11 | 900 | 13.751 | -1.708 | 5.082 | 1.00 | 0.00 |
| H      |    |     |      |     |        |        |       |      |      |
| HETATM | 51 | H16 | CP11 | 900 | 15.019 | -2.627 | 5.853 | 1.00 | 0.00 |
| H      |    |     |      |     |        |        |       |      |      |
| HETATM | 52 | H17 | CP11 | 900 | 13.428 | -2.584 | 6.571 | 1.00 | 0.00 |
| H      |    |     |      |     |        |        |       |      |      |
| HETATM | 53 | H18 | CP11 | 900 | 13.819 | -6.052 | 4.929 | 1.00 | 0.00 |
| H      |    |     |      |     |        |        |       |      |      |
| HETATM | 54 | H19 | CP11 | 900 | 13.436 | -5.272 | 6.441 | 1.00 | 0.00 |
| H      |    |     |      |     |        |        |       |      |      |
| HETATM | 55 | H20 | CP11 | 900 | 15.070 | -5.134 | 5.771 | 1.00 | 0.00 |
| H      |    |     |      |     |        |        |       |      |      |
| HETATM | 56 | H21 | CP11 | 900 | 4.474  | -5.327 | 5.743 | 1.00 | 0.00 |
| H      |    |     |      |     |        |        |       |      |      |
| HETATM | 57 | H22 | CP11 | 900 | 3.073  | -1.249 | 3.319 | 1.00 | 0.00 |
| H      |    |     |      |     |        |        |       |      |      |
| HETATM | 58 | H23 | CP11 | 900 | 5.396  | -1.557 | 3.973 | 1.00 | 0.00 |
| H      |    |     |      |     |        |        |       |      |      |
| HETATM | 59 | H24 | CP11 | 900 | -0.936 | -3.887 | 3.836 | 1.00 | 0.00 |
| H      |    |     |      |     |        |        |       |      |      |
| HETATM | 60 | H25 | CP11 | 900 | -0.561 | -1.782 | 2.811 | 1.00 | 0.00 |
| H      |    |     |      |     |        |        |       |      |      |
| HETATM | 61 | H26 | CP11 | 900 | 1.034  | -1.662 | 2.077 | 1.00 | 0.00 |
| H      |    |     |      |     |        |        |       |      |      |
| HETATM | 62 | H27 | CP11 | 900 | 0.702  | -0.862 | 3.622 | 1.00 | 0.00 |
| H      |    |     |      |     |        |        |       |      |      |
| HETATM | 63 | H28 | CP11 | 900 | 1.428  | -7.219 | 6.058 | 1.00 | 0.00 |
| H      |    |     |      |     |        |        |       |      |      |
| HETATM | 64 | H29 | CP11 | 900 | 2.631  | -6.219 | 6.849 | 1.00 | 0.00 |
| H      |    |     |      |     |        |        |       |      |      |
| HETATM | 65 | H30 | CP11 | 900 | 3.002  | -7.019 | 5.315 | 1.00 | 0.00 |
| H      |    |     |      |     |        |        |       |      |      |
| CONECT | 1  | 2   | 6    | 36  | 37     |        |       |      |      |
| CONECT | 2  | 1   | 3    | 38  | 39     |        |       |      |      |
| CONECT | 3  | 2   | 4    | 9   | 40     |        |       |      |      |

|         |    |    |    |    |    |
|---------|----|----|----|----|----|
| CONNECT | 4  | 3  | 5  | 8  | 41 |
| CONNECT | 5  | 4  | 6  | 7  |    |
| CONNECT | 6  | 1  | 5  | 23 |    |
| CONNECT | 7  | 5  | 28 | 24 |    |
| CONNECT | 8  | 4  | 14 | 10 |    |
| CONNECT | 9  | 3  | 16 | 42 |    |
| CONNECT | 10 | 8  | 11 | 43 |    |
| CONNECT | 11 | 10 | 12 | 44 |    |
| CONNECT | 12 | 11 | 13 | 15 |    |
| CONNECT | 13 | 12 | 14 | 45 |    |
| CONNECT | 14 | 8  | 13 | 46 |    |
| CONNECT | 15 | 12 |    |    |    |
| CONNECT | 16 | 9  | 17 | 21 | 22 |
| CONNECT | 17 | 16 | 18 | 47 | 48 |
| CONNECT | 18 | 17 | 19 | 20 | 49 |
| CONNECT | 19 | 18 | 50 | 51 | 52 |
| CONNECT | 20 | 18 | 53 | 54 | 55 |
| CONNECT | 21 | 16 |    |    |    |
| CONNECT | 22 | 16 |    |    |    |
| CONNECT | 23 | 6  |    |    |    |
| CONNECT | 24 | 7  | 25 | 56 |    |
| CONNECT | 25 | 24 | 26 | 29 |    |
| CONNECT | 26 | 25 | 27 | 32 |    |
| CONNECT | 27 | 26 | 28 | 57 |    |
| CONNECT | 28 | 7  | 27 | 58 |    |
| CONNECT | 29 | 25 | 30 | 35 |    |
| CONNECT | 30 | 29 | 31 | 33 |    |
| CONNECT | 31 | 30 | 32 | 59 |    |
| CONNECT | 32 | 26 | 31 | 34 |    |
| CONNECT | 33 | 30 |    |    |    |
| CONNECT | 34 | 32 | 60 | 61 | 62 |
| CONNECT | 35 | 29 | 63 | 64 | 65 |
| CONNECT | 36 | 1  |    |    |    |
| CONNECT | 37 | 1  |    |    |    |
| CONNECT | 38 | 2  |    |    |    |
| CONNECT | 39 | 2  |    |    |    |
| CONNECT | 40 | 3  |    |    |    |
| CONNECT | 41 | 4  |    |    |    |
| CONNECT | 42 | 9  |    |    |    |
| CONNECT | 43 | 10 |    |    |    |
| CONNECT | 44 | 11 |    |    |    |
| CONNECT | 45 | 13 |    |    |    |
| CONNECT | 46 | 14 |    |    |    |
| CONNECT | 47 | 17 |    |    |    |
| CONNECT | 48 | 17 |    |    |    |
| CONNECT | 49 | 18 |    |    |    |
| CONNECT | 50 | 19 |    |    |    |
| CONNECT | 51 | 19 |    |    |    |
| CONNECT | 52 | 19 |    |    |    |
| CONNECT | 53 | 20 |    |    |    |
| CONNECT | 54 | 20 |    |    |    |
| CONNECT | 55 | 20 |    |    |    |
| CONNECT | 56 | 24 |    |    |    |
| CONNECT | 57 | 27 |    |    |    |
| CONNECT | 58 | 28 |    |    |    |
| CONNECT | 59 | 31 |    |    |    |
| CONNECT | 60 | 34 |    |    |    |

```

CONNECT 61 34
CONNECT 62 34
CONNECT 63 35
CONNECT 64 35
CONNECT 65 35
ENDMDL
END

```

## 10b

```

REMARK 4 COMPLIES WITH FORMAT V. 3.0, 1-DEC-2006
REMARK 888
REMARK 888 WRITTEN BY MAESTRO (A PRODUCT OF SCHRODINGER, LLC)
TITLE LP-99
MODEL 1
MODEL 1
HETATM 1 CAK 6B2 A 201 -5.259 -16.888 -1.587 1.00 9.63
C
HETATM 2 CAJ 6B2 A 201 -5.798 -15.463 -1.540 1.00 9.39
C
HETATM 3 CAI 6B2 A 201 -5.013 -14.427 -1.176 1.00 9.13
C
HETATM 4 CAH 6B2 A 201 -5.428 -13.038 -1.140 1.00 9.23
C
HETATM 5 OAL 6B2 A 201 -4.628 -12.167 -0.798 1.00 7.98
O
HETATM 6 NAG 6B2 A 201 -6.729 -12.832 -1.528 1.00 9.53
N
HETATM 7 CAM 6B2 A 201 -7.199 -11.434 -1.544 1.00 9.19
C
HETATM 8 CAD 6B2 A 201 -7.647 -13.855 -1.940 1.00 9.54
C
HETATM 9 CAC 6B2 A 201 -8.966 -13.574 -2.347 1.00 9.59
C
HETATM 10 CAE 6B2 A 201 -7.206 -15.199 -1.940 1.00 9.78
C
HETATM 11 CAF 6B2 A 201 -8.086 -16.226 -2.306 1.00 10.55
C
HETATM 12 CAA 6B2 A 201 -9.381 -15.927 -2.715 1.00 10.76
C
HETATM 13 CAB 6B2 A 201 -9.824 -14.598 -2.767 1.00 10.31
C
HETATM 14 NAN 6B2 A 201 -11.105 -14.280 -3.290 1.00 12.38
N
HETATM 15 CAO 6B2 A 201 -11.387 -14.610 -4.600 1.00 11.80
C
HETATM 16 OAT 6B2 A 201 -10.566 -15.115 -5.367 1.00 13.49
O
HETATM 17 CAP 6B2 A 201 -12.795 -14.280 -5.142 1.00 12.33
C
HETATM 18 CAQ 6B2 A 201 -13.861 -14.008 -4.077 1.00 12.23
C
HETATM 19 CAR 6B2 A 201 -13.338 -13.094 -2.965 1.00 13.52
C
HETATM 20 NBA 6B2 A 201 -12.927 -11.779 -3.523 1.00 16.22
N

```

|              |    |      |     |   |     |         |         |        |      |       |
|--------------|----|------|-----|---|-----|---------|---------|--------|------|-------|
| HETATM<br>S  | 21 | SBC  | 6B2 | A | 201 | -14.122 | -10.663 | -4.178 | 1.00 | 22.12 |
| HETATM<br>O  | 22 | OBE  | 6B2 | A | 201 | -15.436 | -11.312 | -4.150 | 1.00 | 23.44 |
| HETATM<br>O  | 23 | OBF  | 6B2 | A | 201 | -13.567 | -10.141 | -5.431 | 1.00 | 23.38 |
| HETATM<br>C  | 24 | CBD  | 6B2 | A | 201 | -14.135 | -9.275  | -2.895 | 1.00 | 25.55 |
| HETATM<br>C  | 25 | CBG  | 6B2 | A | 201 | -14.956 | -8.048  | -3.357 | 1.00 | 30.90 |
| HETATM<br>C  | 26 | CBI  | 6B2 | A | 201 | -16.460 | -8.339  | -3.508 | 1.00 | 33.24 |
| HETATM<br>C  | 27 | CBH  | 6B2 | A | 201 | -14.723 | -6.862  | -2.405 | 1.00 | 31.10 |
| HETATM<br>C  | 28 | CAS  | 6B2 | A | 201 | -12.099 | -13.750 | -2.296 | 1.00 | 12.49 |
| HETATM<br>C  | 29 | CAU  | 6B2 | A | 201 | -12.565 | -14.703 | -1.186 | 1.00 | 11.81 |
| HETATM<br>C  | 30 | CAV  | 6B2 | A | 201 | -12.535 | -16.093 | -1.347 | 1.00 | 12.60 |
| HETATM<br>C  | 31 | CAW  | 6B2 | A | 201 | -12.971 | -16.927 | -0.322 | 1.00 | 12.63 |
| HETATM<br>C  | 32 | CAX  | 6B2 | A | 201 | -13.455 | -16.373 | 0.860  | 1.00 | 13.25 |
| HETATM<br>Cl | 33 | CL   | 6B2 | A | 201 | -13.988 | -17.404 | 2.135  | 1.00 | 18.86 |
| HETATM<br>C  | 34 | CAY  | 6B2 | A | 201 | -13.502 | -14.991 | 1.026  | 1.00 | 13.51 |
| HETATM<br>C  | 35 | CAZ  | 6B2 | A | 201 | -13.040 | -14.158 | 0.013  | 1.00 | 12.52 |
| HETATM<br>H  | 36 | HAK1 | 6B2 | A | 201 | -4.193  | -16.922 | -1.363 | 1.00 | 0.00  |
| HETATM<br>H  | 37 | HAK2 | 6B2 | A | 201 | -5.397  | -17.319 | -2.578 | 1.00 | 0.00  |
| HETATM<br>H  | 38 | HAK3 | 6B2 | A | 201 | -5.766  | -17.517 | -0.856 | 1.00 | 0.00  |
| HETATM<br>H  | 39 | HAI  | 6B2 | A | 201 | -3.986  | -14.619 | -0.899 | 1.00 | 0.00  |
| HETATM<br>H  | 40 | HAM1 | 6B2 | A | 201 | -6.500  | -10.719 | -1.105 | 1.00 | 0.00  |
| HETATM<br>H  | 41 | HAM2 | 6B2 | A | 201 | -8.131  | -11.333 | -0.985 | 1.00 | 0.00  |
| HETATM<br>H  | 42 | HAM3 | 6B2 | A | 201 | -7.367  | -11.118 | -2.572 | 1.00 | 0.00  |
| HETATM<br>H  | 43 | HAC  | 6B2 | A | 201 | -9.327  | -12.559 | -2.393 | 1.00 | 0.00  |
| HETATM<br>H  | 44 | HAF  | 6B2 | A | 201 | -7.774  | -17.260 | -2.287 | 1.00 | 0.00  |
| HETATM<br>H  | 45 | HAA  | 6B2 | A | 201 | -10.027 | -16.733 | -3.030 | 1.00 | 0.00  |
| HETATM<br>H  | 46 | HAP1 | 6B2 | A | 201 | -13.112 | -15.101 | -5.785 | 1.00 | 0.00  |
| HETATM<br>H  | 47 | HAP2 | 6B2 | A | 201 | -12.682 | -13.411 | -5.791 | 1.00 | 0.00  |
| HETATM<br>H  | 48 | HAQ1 | 6B2 | A | 201 | -14.757 | -13.612 | -4.551 | 1.00 | 0.00  |

|             |    |      |     |    |     |         |         |        |      |      |
|-------------|----|------|-----|----|-----|---------|---------|--------|------|------|
| HETATM<br>H | 49 | HAQ2 | 6B2 | A  | 201 | -14.173 | -14.958 | -3.638 | 1.00 | 0.00 |
| HETATM<br>H | 50 | HAR  | 6B2 | A  | 201 | -14.109 | -12.922 | -2.211 | 1.00 | 0.00 |
| HETATM<br>H | 51 | HNBA | 6B2 | A  | 201 | -12.049 | -11.802 | -4.051 | 1.00 | 0.00 |
| HETATM<br>H | 52 | HBD1 | 6B2 | A  | 201 | -14.506 | -9.695  | -1.961 | 1.00 | 0.00 |
| HETATM<br>H | 53 | HBD2 | 6B2 | A  | 201 | -13.089 | -9.009  | -2.739 | 1.00 | 0.00 |
| HETATM<br>H | 54 | HBG  | 6B2 | A  | 201 | -14.568 | -7.749  | -4.334 | 1.00 | 0.00 |
| HETATM<br>H | 55 | HBI1 | 6B2 | A  | 201 | -16.655 | -9.066  | -4.295 | 1.00 | 0.00 |
| HETATM<br>H | 56 | HBI2 | 6B2 | A  | 201 | -17.010 | -7.436  | -3.775 | 1.00 | 0.00 |
| HETATM<br>H | 57 | HBI3 | 6B2 | A  | 201 | -16.888 | -8.726  | -2.583 | 1.00 | 0.00 |
| HETATM<br>H | 58 | HBH1 | 6B2 | A  | 201 | -13.662 | -6.615  | -2.331 | 1.00 | 0.00 |
| HETATM<br>H | 59 | HBH2 | 6B2 | A  | 201 | -15.083 | -7.081  | -1.398 | 1.00 | 0.00 |
| HETATM<br>H | 60 | HBH3 | 6B2 | A  | 201 | -15.239 | -5.968  | -2.753 | 1.00 | 0.00 |
| HETATM<br>H | 61 | HAS  | 6B2 | A  | 201 | -11.577 | -12.964 | -1.748 | 1.00 | 0.00 |
| HETATM<br>H | 62 | HAV  | 6B2 | A  | 201 | -12.183 | -16.534 | -2.267 | 1.00 | 0.00 |
| HETATM<br>H | 63 | HAW  | 6B2 | A  | 201 | -12.940 | -18.000 | -0.446 | 1.00 | 0.00 |
| HETATM<br>H | 64 | HAY  | 6B2 | A  | 201 | -13.874 | -14.568 | 1.948  | 1.00 | 0.00 |
| HETATM<br>H | 65 | HAZ  | 6B2 | A  | 201 | -13.067 | -13.088 | 0.154  | 1.00 | 0.00 |
| CONNECT     | 1  | 2    | 36  | 37 | 38  |         |         |        |      |      |
| CONNECT     | 2  | 1    | 3   | 10 |     |         |         |        |      |      |
| CONNECT     | 3  | 2    | 4   | 39 |     |         |         |        |      |      |
| CONNECT     | 4  | 3    | 5   | 6  |     |         |         |        |      |      |
| CONNECT     | 5  | 4    |     |    |     |         |         |        |      |      |
| CONNECT     | 6  | 4    | 7   | 8  |     |         |         |        |      |      |
| CONNECT     | 7  | 6    | 40  | 41 | 42  |         |         |        |      |      |
| CONNECT     | 8  | 6    | 9   | 10 |     |         |         |        |      |      |
| CONNECT     | 9  | 8    | 13  | 43 |     |         |         |        |      |      |
| CONNECT     | 10 | 2    | 8   | 11 |     |         |         |        |      |      |
| CONNECT     | 11 | 10   | 12  | 44 |     |         |         |        |      |      |
| CONNECT     | 12 | 11   | 13  | 45 |     |         |         |        |      |      |
| CONNECT     | 13 | 9    | 12  | 14 |     |         |         |        |      |      |
| CONNECT     | 14 | 13   | 15  | 28 |     |         |         |        |      |      |
| CONNECT     | 15 | 14   | 16  | 17 |     |         |         |        |      |      |
| CONNECT     | 16 | 15   |     |    |     |         |         |        |      |      |
| CONNECT     | 17 | 15   | 18  | 46 | 47  |         |         |        |      |      |
| CONNECT     | 18 | 17   | 19  | 48 | 49  |         |         |        |      |      |
| CONNECT     | 19 | 18   | 20  | 28 | 50  |         |         |        |      |      |
| CONNECT     | 20 | 19   | 21  | 51 |     |         |         |        |      |      |
| CONNECT     | 21 | 20   | 22  | 23 | 24  |         |         |        |      |      |
| CONNECT     | 22 | 21   |     |    |     |         |         |        |      |      |
| CONNECT     | 23 | 21   |     |    |     |         |         |        |      |      |

|         |    |    |    |    |    |
|---------|----|----|----|----|----|
| CONNECT | 24 | 21 | 25 | 52 | 53 |
| CONNECT | 25 | 24 | 26 | 27 | 54 |
| CONNECT | 26 | 25 | 55 | 56 | 57 |
| CONNECT | 27 | 25 | 58 | 59 | 60 |
| CONNECT | 28 | 14 | 19 | 29 | 61 |
| CONNECT | 29 | 28 | 30 | 35 |    |
| CONNECT | 30 | 29 | 31 | 62 |    |
| CONNECT | 31 | 30 | 32 | 63 |    |
| CONNECT | 32 | 31 | 33 | 34 |    |
| CONNECT | 33 | 32 |    |    |    |
| CONNECT | 34 | 32 | 35 | 64 |    |
| CONNECT | 35 | 29 | 34 | 65 |    |
| CONNECT | 36 | 1  |    |    |    |
| CONNECT | 37 | 1  |    |    |    |
| CONNECT | 38 | 1  |    |    |    |
| CONNECT | 39 | 3  |    |    |    |
| CONNECT | 40 | 7  |    |    |    |
| CONNECT | 41 | 7  |    |    |    |
| CONNECT | 42 | 7  |    |    |    |
| CONNECT | 43 | 9  |    |    |    |
| CONNECT | 44 | 11 |    |    |    |
| CONNECT | 45 | 12 |    |    |    |
| CONNECT | 46 | 17 |    |    |    |
| CONNECT | 47 | 17 |    |    |    |
| CONNECT | 48 | 18 |    |    |    |
| CONNECT | 49 | 18 |    |    |    |
| CONNECT | 50 | 19 |    |    |    |
| CONNECT | 51 | 20 |    |    |    |
| CONNECT | 52 | 24 |    |    |    |
| CONNECT | 53 | 24 |    |    |    |
| CONNECT | 54 | 25 |    |    |    |
| CONNECT | 55 | 26 |    |    |    |
| CONNECT | 56 | 26 |    |    |    |
| CONNECT | 57 | 26 |    |    |    |
| CONNECT | 58 | 27 |    |    |    |
| CONNECT | 59 | 27 |    |    |    |
| CONNECT | 60 | 27 |    |    |    |
| CONNECT | 61 | 28 |    |    |    |
| CONNECT | 62 | 30 |    |    |    |
| CONNECT | 63 | 31 |    |    |    |
| CONNECT | 64 | 34 |    |    |    |
| CONNECT | 65 | 35 |    |    |    |
| ENDMDL  |    |    |    |    |    |
| END     |    |    |    |    |    |

## II

|        |            |                                                    |      |     |       |        |       |      |      |
|--------|------------|----------------------------------------------------|------|-----|-------|--------|-------|------|------|
| REMARK | 4          | COMPLIES WITH FORMAT V. 3.0, 1-DEC-2006            |      |     |       |        |       |      |      |
| REMARK | 888        |                                                    |      |     |       |        |       |      |      |
| REMARK | 888        | WRITTEN BY MAESTRO (A PRODUCT OF SCHRODINGER, LLC) |      |     |       |        |       |      |      |
| TITLE  | compund_64 |                                                    |      |     |       |        |       |      |      |
| MODEL  | 1          |                                                    |      |     |       |        |       |      |      |
| HETATM | 1          | C1                                                 | CP12 | 900 | 8.973 | -9.508 | 3.241 | 1.00 | 0.00 |
| C      |            |                                                    |      |     |       |        |       |      |      |
| HETATM | 2          | C2                                                 | CP12 | 900 | 9.816 | -9.785 | 4.489 | 1.00 | 0.00 |
| C      |            |                                                    |      |     |       |        |       |      |      |

|              |    |     |      |     |        |         |        |      |      |
|--------------|----|-----|------|-----|--------|---------|--------|------|------|
| HETATM<br>C  | 3  | C3  | CP12 | 900 | 11.310 | -9.613  | 4.207  | 1.00 | 0.00 |
| HETATM<br>C  | 4  | C4  | CP12 | 900 | 11.671 | -10.642 | 3.095  | 1.00 | 0.00 |
| HETATM<br>N  | 5  | N1  | CP12 | 900 | 10.837 | -10.456 | 1.860  | 1.00 | 0.00 |
| HETATM<br>C  | 6  | C5  | CP12 | 900 | 9.495  | -10.134 | 1.927  | 1.00 | 0.00 |
| HETATM<br>C  | 7  | C6  | CP12 | 900 | 11.405 | -10.883 | 0.613  | 1.00 | 0.00 |
| HETATM<br>C  | 8  | C7  | CP12 | 900 | 11.803 | -12.061 | 3.667  | 1.00 | 0.00 |
| HETATM<br>N  | 9  | N2  | CP12 | 900 | 11.818 | -8.247  | 3.956  | 1.00 | 0.00 |
| HETATM<br>C  | 10 | C8  | CP12 | 900 | 10.732 | -12.963 | 3.644  | 1.00 | 0.00 |
| HETATM<br>C  | 11 | C9  | CP12 | 900 | 10.885 | -14.243 | 4.171  | 1.00 | 0.00 |
| HETATM<br>C  | 12 | C10 | CP12 | 900 | 12.112 | -14.629 | 4.705  | 1.00 | 0.00 |
| HETATM<br>C  | 13 | C11 | CP12 | 900 | 13.189 | -13.746 | 4.711  | 1.00 | 0.00 |
| HETATM<br>C  | 14 | C12 | CP12 | 900 | 13.037 | -12.468 | 4.180  | 1.00 | 0.00 |
| HETATM<br>C1 | 15 | CL1 | CP12 | 900 | 12.298 | -16.209 | 5.371  | 1.00 | 0.00 |
| HETATM<br>O  | 16 | O1  | CP12 | 900 | 8.720  | -10.246 | 0.975  | 1.00 | 0.00 |
| HETATM<br>C  | 17 | C13 | CP12 | 900 | 11.247 | -10.100 | -0.542 | 1.00 | 0.00 |
| HETATM<br>C  | 18 | C14 | CP12 | 900 | 11.804 | -10.458 | -1.780 | 1.00 | 0.00 |
| HETATM<br>C  | 19 | C15 | CP12 | 900 | 12.528 | -11.663 | -1.868 | 1.00 | 0.00 |
| HETATM<br>C  | 20 | C16 | CP12 | 900 | 12.694 | -12.455 | -0.727 | 1.00 | 0.00 |
| HETATM<br>C  | 21 | C17 | CP12 | 900 | 12.148 | -12.068 | 0.495  | 1.00 | 0.00 |
| HETATM<br>N  | 22 | N3  | CP12 | 900 | 11.662 | -9.644  | -2.951 | 1.00 | 0.00 |
| HETATM<br>C  | 23 | C18 | CP12 | 900 | 12.219 | -9.916  | -4.175 | 1.00 | 0.00 |
| HETATM<br>C  | 24 | C19 | CP12 | 900 | 12.921 | -11.186 | -4.236 | 1.00 | 0.00 |
| HETATM<br>C  | 25 | C20 | CP12 | 900 | 13.092 | -12.029 | -3.193 | 1.00 | 0.00 |
| HETATM<br>O  | 26 | O2  | CP12 | 900 | 12.167 | -9.176  | -5.160 | 1.00 | 0.00 |
| HETATM<br>C  | 27 | C21 | CP12 | 900 | 13.854 | -13.340 | -3.339 | 1.00 | 0.00 |
| HETATM<br>C  | 28 | C22 | CP12 | 900 | 10.886 | -8.392  | -2.831 | 1.00 | 0.00 |
| HETATM<br>C  | 29 | C23 | CP12 | 900 | 11.407 | -7.092  | 4.518  | 1.00 | 0.00 |
| HETATM<br>N  | 30 | N4  | CP12 | 900 | 12.396 | -6.183  | 4.545  | 1.00 | 0.00 |

|             |    |     |      |     |        |         |        |      |      |
|-------------|----|-----|------|-----|--------|---------|--------|------|------|
| HETATM<br>C | 31 | C24 | CP12 | 900 | 12.282 | -4.798  | 4.777  | 1.00 | 0.00 |
| HETATM<br>C | 32 | C25 | CP12 | 900 | 11.112 | -4.071  | 4.510  | 1.00 | 0.00 |
| HETATM<br>C | 33 | C26 | CP12 | 900 | 11.098 | -2.689  | 4.668  | 1.00 | 0.00 |
| HETATM<br>C | 34 | C27 | CP12 | 900 | 12.249 | -2.030  | 5.087  | 1.00 | 0.00 |
| HETATM<br>C | 35 | C28 | CP12 | 900 | 13.411 | -2.743  | 5.371  | 1.00 | 0.00 |
| HETATM<br>C | 36 | C29 | CP12 | 900 | 13.421 | -4.128  | 5.227  | 1.00 | 0.00 |
| HETATM<br>O | 37 | O3  | CP12 | 900 | 10.276 | -6.893  | 4.962  | 1.00 | 0.00 |
| HETATM<br>H | 38 | H1  | CP12 | 900 | 7.949  | -9.848  | 3.407  | 1.00 | 0.00 |
| HETATM<br>H | 39 | H2  | CP12 | 900 | 8.912  | -8.434  | 3.074  | 1.00 | 0.00 |
| HETATM<br>H | 40 | H3  | CP12 | 900 | 9.494  | -9.142  | 5.308  | 1.00 | 0.00 |
| HETATM<br>H | 41 | H4  | CP12 | 900 | 9.608  | -10.790 | 4.859  | 1.00 | 0.00 |
| HETATM<br>H | 42 | H5  | CP12 | 900 | 11.820 | -9.901  | 5.127  | 1.00 | 0.00 |
| HETATM<br>H | 43 | H6  | CP12 | 900 | 12.687 | -10.397 | 2.779  | 1.00 | 0.00 |
| HETATM<br>H | 44 | H7  | CP12 | 900 | 12.704 | -8.210  | 3.469  | 1.00 | 0.00 |
| HETATM<br>H | 45 | H8  | CP12 | 900 | 9.777  | -12.674 | 3.233  | 1.00 | 0.00 |
| HETATM<br>H | 46 | H9  | CP12 | 900 | 10.054 | -14.933 | 4.163  | 1.00 | 0.00 |
| HETATM<br>H | 47 | H10 | CP12 | 900 | 14.137 | -14.048 | 5.131  | 1.00 | 0.00 |
| HETATM<br>H | 48 | H11 | CP12 | 900 | 13.874 | -11.786 | 4.204  | 1.00 | 0.00 |
| HETATM<br>H | 49 | H12 | CP12 | 900 | 10.669 | -9.197  | -0.470 | 1.00 | 0.00 |
| HETATM<br>H | 50 | H13 | CP12 | 900 | 13.247 | -13.383 | -0.770 | 1.00 | 0.00 |
| HETATM<br>H | 51 | H14 | CP12 | 900 | 12.301 | -12.730 | 1.329  | 1.00 | 0.00 |
| HETATM<br>H | 52 | H15 | CP12 | 900 | 13.342 | -11.449 | -5.196 | 1.00 | 0.00 |
| HETATM<br>H | 53 | H16 | CP12 | 900 | 14.209 | -13.491 | -4.359 | 1.00 | 0.00 |
| HETATM<br>H | 54 | H17 | CP12 | 900 | 13.211 | -14.184 | -3.087 | 1.00 | 0.00 |
| HETATM<br>H | 55 | H18 | CP12 | 900 | 14.726 | -13.355 | -2.682 | 1.00 | 0.00 |
| HETATM<br>H | 56 | H19 | CP12 | 900 | 10.798 | -7.825  | -3.759 | 1.00 | 0.00 |
| HETATM<br>H | 57 | H20 | CP12 | 900 | 11.343 | -7.733  | -2.093 | 1.00 | 0.00 |
| HETATM<br>H | 58 | H21 | CP12 | 900 | 9.868  | -8.614  | -2.507 | 1.00 | 0.00 |

|         |    |     |      |     |        |        |       |      |      |
|---------|----|-----|------|-----|--------|--------|-------|------|------|
| HETATM  | 59 | H22 | CP12 | 900 | 13.316 | -6.522 | 4.307 | 1.00 | 0.00 |
| H       |    |     |      |     |        |        |       |      |      |
| HETATM  | 60 | H23 | CP12 | 900 | 10.218 | -4.557 | 4.147 | 1.00 | 0.00 |
| H       |    |     |      |     |        |        |       |      |      |
| HETATM  | 61 | H24 | CP12 | 900 | 10.198 | -2.132 | 4.460 | 1.00 | 0.00 |
| H       |    |     |      |     |        |        |       |      |      |
| HETATM  | 62 | H25 | CP12 | 900 | 12.231 | -0.955 | 5.208 | 1.00 | 0.00 |
| H       |    |     |      |     |        |        |       |      |      |
| HETATM  | 63 | H26 | CP12 | 900 | 14.291 | -2.222 | 5.714 | 1.00 | 0.00 |
| H       |    |     |      |     |        |        |       |      |      |
| HETATM  | 64 | H27 | CP12 | 900 | 14.322 | -4.673 | 5.462 | 1.00 | 0.00 |
| H       |    |     |      |     |        |        |       |      |      |
| CONNECT | 1  | 2   | 6    | 38  | 39     |        |       |      |      |
| CONNECT | 2  | 1   | 3    | 40  | 41     |        |       |      |      |
| CONNECT | 3  | 2   | 4    | 9   | 42     |        |       |      |      |
| CONNECT | 4  | 3   | 5    | 8   | 43     |        |       |      |      |
| CONNECT | 5  | 4   | 6    | 7   |        |        |       |      |      |
| CONNECT | 6  | 1   | 5    | 16  |        |        |       |      |      |
| CONNECT | 7  | 5   | 21   | 17  |        |        |       |      |      |
| CONNECT | 8  | 4   | 14   | 10  |        |        |       |      |      |
| CONNECT | 9  | 3   | 29   | 44  |        |        |       |      |      |
| CONNECT | 10 | 8   | 11   | 45  |        |        |       |      |      |
| CONNECT | 11 | 10  | 12   | 46  |        |        |       |      |      |
| CONNECT | 12 | 11  | 13   | 15  |        |        |       |      |      |
| CONNECT | 13 | 12  | 14   | 47  |        |        |       |      |      |
| CONNECT | 14 | 8   | 13   | 48  |        |        |       |      |      |
| CONNECT | 15 | 12  |      |     |        |        |       |      |      |
| CONNECT | 16 | 6   |      |     |        |        |       |      |      |
| CONNECT | 17 | 7   | 18   | 49  |        |        |       |      |      |
| CONNECT | 18 | 17  | 19   | 22  |        |        |       |      |      |
| CONNECT | 19 | 18  | 20   | 25  |        |        |       |      |      |
| CONNECT | 20 | 19  | 21   | 50  |        |        |       |      |      |
| CONNECT | 21 | 7   | 20   | 51  |        |        |       |      |      |
| CONNECT | 22 | 18  | 23   | 28  |        |        |       |      |      |
| CONNECT | 23 | 22  | 24   | 26  |        |        |       |      |      |
| CONNECT | 24 | 23  | 25   | 52  |        |        |       |      |      |
| CONNECT | 25 | 19  | 24   | 27  |        |        |       |      |      |
| CONNECT | 26 | 23  |      |     |        |        |       |      |      |
| CONNECT | 27 | 25  | 53   | 54  | 55     |        |       |      |      |
| CONNECT | 28 | 22  | 56   | 57  | 58     |        |       |      |      |
| CONNECT | 29 | 9   | 30   | 37  |        |        |       |      |      |
| CONNECT | 30 | 29  | 31   | 59  |        |        |       |      |      |
| CONNECT | 31 | 30  | 36   | 32  |        |        |       |      |      |
| CONNECT | 32 | 31  | 33   | 60  |        |        |       |      |      |
| CONNECT | 33 | 32  | 34   | 61  |        |        |       |      |      |
| CONNECT | 34 | 33  | 35   | 62  |        |        |       |      |      |
| CONNECT | 35 | 34  | 36   | 63  |        |        |       |      |      |
| CONNECT | 36 | 31  | 35   | 64  |        |        |       |      |      |
| CONNECT | 37 | 29  |      |     |        |        |       |      |      |
| CONNECT | 38 | 1   |      |     |        |        |       |      |      |
| CONNECT | 39 | 1   |      |     |        |        |       |      |      |
| CONNECT | 40 | 2   |      |     |        |        |       |      |      |
| CONNECT | 41 | 2   |      |     |        |        |       |      |      |
| CONNECT | 42 | 3   |      |     |        |        |       |      |      |
| CONNECT | 43 | 4   |      |     |        |        |       |      |      |
| CONNECT | 44 | 9   |      |     |        |        |       |      |      |
| CONNECT | 45 | 10  |      |     |        |        |       |      |      |

```

CONNECT 46 11
CONNECT 47 13
CONNECT 48 14
CONNECT 49 17
CONNECT 50 20
CONNECT 51 21
CONNECT 52 24
CONNECT 53 27
CONNECT 54 27
CONNECT 55 27
CONNECT 56 28
CONNECT 57 28
CONNECT 58 28
CONNECT 59 30
CONNECT 60 32
CONNECT 61 33
CONNECT 62 34
CONNECT 63 35
CONNECT 64 36
ENDMDL
END

```

## 12

```

REMARK 4 COMPLIES WITH FORMAT V. 3.0, 1-DEC-2006
REMARK 888
REMARK 888 WRITTEN BY MAESTRO (A PRODUCT OF SCHRODINGER, LLC)
TITLE PF-47736
MODEL 1
HETATM 1 N1 CP13 900 10.946 -2.921 4.966 1.00 0.00
N
HETATM 2 N2 CP13 900 12.098 -3.675 4.943 1.00 0.00
N
HETATM 3 C1 CP13 900 12.408 -4.996 5.046 1.00 0.00
C
HETATM 4 C2 CP13 900 11.377 -6.056 4.708 1.00 0.00
C
HETATM 5 C3 CP13 900 10.003 -5.837 4.562 1.00 0.00
C
HETATM 6 C4 CP13 900 9.218 -4.658 4.639 1.00 0.00
C
HETATM 7 C5 CP13 900 9.743 -3.332 4.856 1.00 0.00
C
HETATM 8 O1 CP13 900 13.550 -5.326 5.372 1.00 0.00
O
HETATM 9 C6 CP13 900 11.832 -7.371 4.534 1.00 0.00
C
HETATM 10 C7 CP13 900 10.967 -8.424 4.232 1.00 0.00
C
HETATM 11 C8 CP13 900 9.589 -8.226 4.096 1.00 0.00
C
HETATM 12 C9 CP13 900 9.130 -6.917 4.256 1.00 0.00
C
HETATM 13 C10 CP13 900 7.889 -5.027 4.442 1.00 0.00
C

```

|               |    |     |      |     |        |         |       |      |      |
|---------------|----|-----|------|-----|--------|---------|-------|------|------|
| HETATM<br>N   | 14 | N3  | CP13 | 900 | 7.867  | -6.376  | 4.172 | 1.00 | 0.00 |
| HETATM<br>C   | 15 | C11 | CP13 | 900 | 6.643  | -4.269  | 4.452 | 1.00 | 0.00 |
| HETATM<br>C   | 16 | C12 | CP13 | 900 | 5.461  | -4.533  | 3.740 | 1.00 | 0.00 |
| HETATM<br>N   | 17 | N4  | CP13 | 900 | 4.524  | -3.633  | 3.932 | 1.00 | 0.00 |
| HETATM<br>N   | 18 | N5  | CP13 | 900 | 5.069  | -2.760  | 4.784 | 1.00 | 0.00 |
| HETATM<br>C   | 19 | C13 | CP13 | 900 | 6.336  | -3.116  | 5.162 | 1.00 | 0.00 |
| HETATM<br>C   | 20 | C14 | CP13 | 900 | 4.312  | -1.592  | 5.186 | 1.00 | 0.00 |
| HETATM<br>N   | 21 | N6  | CP13 | 900 | 11.518 | -9.704  | 4.172 | 1.00 | 0.00 |
| HETATM<br>C   | 22 | C15 | CP13 | 900 | 11.435 | -10.553 | 3.128 | 1.00 | 0.00 |
| HETATM<br>C   | 23 | C16 | CP13 | 900 | 12.195 | -11.900 | 3.237 | 1.00 | 0.00 |
| HETATM<br>O   | 24 | O2  | CP13 | 900 | 10.826 | -10.318 | 2.084 | 1.00 | 0.00 |
| HETATM<br>C   | 25 | C17 | CP13 | 900 | 13.740 | -11.852 | 3.014 | 1.00 | 0.00 |
| HETATM<br>C   | 26 | C18 | CP13 | 900 | 14.299 | -13.274 | 2.732 | 1.00 | 0.00 |
| HETATM<br>C   | 27 | C19 | CP13 | 900 | 15.831 | -13.298 | 2.552 | 1.00 | 0.00 |
| HETATM<br>C   | 28 | C20 | CP13 | 900 | 16.291 | -12.306 | 1.469 | 1.00 | 0.00 |
| HETATM<br>C   | 29 | C21 | CP13 | 900 | 15.763 | -10.892 | 1.761 | 1.00 | 0.00 |
| HETATM<br>C   | 30 | C22 | CP13 | 900 | 14.230 | -10.863 | 1.920 | 1.00 | 0.00 |
| HETATM<br>N1+ | 31 | N7  | CP13 | 900 | 11.822 | -12.489 | 4.571 | 1.00 | 0.00 |
| HETATM<br>H   | 32 | H1  | CP13 | 900 | 12.878 | -3.046  | 5.056 | 1.00 | 0.00 |
| HETATM<br>H   | 33 | H2  | CP13 | 900 | 9.005  | -2.539  | 4.917 | 1.00 | 0.00 |
| HETATM<br>H   | 34 | H3  | CP13 | 900 | 12.887 | -7.586  | 4.629 | 1.00 | 0.00 |
| HETATM<br>H   | 35 | H4  | CP13 | 900 | 8.918  | -9.047  | 3.890 | 1.00 | 0.00 |
| HETATM<br>H   | 36 | H5  | CP13 | 900 | 7.006  | -6.863  | 3.975 | 1.00 | 0.00 |
| HETATM<br>H   | 37 | H6  | CP13 | 900 | 5.300  | -5.360  | 3.063 | 1.00 | 0.00 |
| HETATM<br>H   | 38 | H7  | CP13 | 900 | 6.898  | -2.507  | 5.856 | 1.00 | 0.00 |
| HETATM<br>H   | 39 | H8  | CP13 | 900 | 4.941  | -0.933  | 5.784 | 1.00 | 0.00 |
| HETATM<br>H   | 40 | H9  | CP13 | 900 | 3.447  | -1.905  | 5.771 | 1.00 | 0.00 |
| HETATM<br>H   | 41 | H10 | CP13 | 900 | 3.981  | -1.049  | 4.300 | 1.00 | 0.00 |

|        |    |     |      |     |        |         |       |      |      |
|--------|----|-----|------|-----|--------|---------|-------|------|------|
| HETATM | 42 | H11 | CP13 | 900 | 12.130 | -9.944  | 4.934 | 1.00 | 0.00 |
| H      |    |     |      |     |        |         |       |      |      |
| HETATM | 43 | H12 | CP13 | 900 | 11.747 | -12.611 | 2.537 | 1.00 | 0.00 |
| H      |    |     |      |     |        |         |       |      |      |
| HETATM | 44 | H13 | CP13 | 900 | 14.175 | -11.510 | 3.956 | 1.00 | 0.00 |
| H      |    |     |      |     |        |         |       |      |      |
| HETATM | 45 | H14 | CP13 | 900 | 14.029 | -13.958 | 3.538 | 1.00 | 0.00 |
| H      |    |     |      |     |        |         |       |      |      |
| HETATM | 46 | H15 | CP13 | 900 | 13.834 | -13.674 | 1.830 | 1.00 | 0.00 |
| H      |    |     |      |     |        |         |       |      |      |
| HETATM | 47 | H16 | CP13 | 900 | 16.162 | -14.306 | 2.297 | 1.00 | 0.00 |
| H      |    |     |      |     |        |         |       |      |      |
| HETATM | 48 | H17 | CP13 | 900 | 16.312 | -13.051 | 3.500 | 1.00 | 0.00 |
| H      |    |     |      |     |        |         |       |      |      |
| HETATM | 49 | H18 | CP13 | 900 | 17.381 | -12.294 | 1.413 | 1.00 | 0.00 |
| H      |    |     |      |     |        |         |       |      |      |
| HETATM | 50 | H19 | CP13 | 900 | 15.937 | -12.636 | 0.490 | 1.00 | 0.00 |
| H      |    |     |      |     |        |         |       |      |      |
| HETATM | 51 | H20 | CP13 | 900 | 16.068 | -10.204 | 0.971 | 1.00 | 0.00 |
| H      |    |     |      |     |        |         |       |      |      |
| HETATM | 52 | H21 | CP13 | 900 | 16.223 | -10.532 | 2.684 | 1.00 | 0.00 |
| H      |    |     |      |     |        |         |       |      |      |
| HETATM | 53 | H22 | CP13 | 900 | 13.928 | -9.842  | 2.158 | 1.00 | 0.00 |
| H      |    |     |      |     |        |         |       |      |      |
| HETATM | 54 | H23 | CP13 | 900 | 13.758 | -11.104 | 0.966 | 1.00 | 0.00 |
| H      |    |     |      |     |        |         |       |      |      |
| HETATM | 55 | H24 | CP13 | 900 | 10.857 | -12.268 | 4.776 | 1.00 | 0.00 |
| H      |    |     |      |     |        |         |       |      |      |
| HETATM | 56 | H25 | CP13 | 900 | 11.927 | -13.493 | 4.524 | 1.00 | 0.00 |
| H      |    |     |      |     |        |         |       |      |      |
| HETATM | 57 | H26 | CP13 | 900 | 12.434 | -12.128 | 5.293 | 1.00 | 0.00 |
| H      |    |     |      |     |        |         |       |      |      |
| CONECT | 1  | 2   | 7    |     |        |         |       |      |      |
| CONECT | 2  | 1   | 3    | 32  |        |         |       |      |      |
| CONECT | 3  | 2   | 4    | 8   |        |         |       |      |      |
| CONECT | 4  | 3   | 5    | 9   |        |         |       |      |      |
| CONECT | 5  | 4   | 6    | 12  |        |         |       |      |      |
| CONECT | 6  | 5   | 7    | 13  |        |         |       |      |      |
| CONECT | 7  | 1   | 6    | 33  |        |         |       |      |      |
| CONECT | 8  | 3   |      |     |        |         |       |      |      |
| CONECT | 9  | 4   | 10   | 34  |        |         |       |      |      |
| CONECT | 10 | 9   | 11   | 21  |        |         |       |      |      |
| CONECT | 11 | 10  | 12   | 35  |        |         |       |      |      |
| CONECT | 12 | 5   | 11   | 14  |        |         |       |      |      |
| CONECT | 13 | 6   | 14   | 15  |        |         |       |      |      |
| CONECT | 14 | 12  | 13   | 36  |        |         |       |      |      |
| CONECT | 15 | 13  | 19   | 16  |        |         |       |      |      |
| CONECT | 16 | 15  | 17   | 37  |        |         |       |      |      |
| CONECT | 17 | 16  | 18   |     |        |         |       |      |      |
| CONECT | 18 | 17  | 19   | 20  |        |         |       |      |      |
| CONECT | 19 | 15  | 18   | 38  |        |         |       |      |      |
| CONECT | 20 | 18  | 39   | 40  | 41     |         |       |      |      |
| CONECT | 21 | 10  | 22   | 42  |        |         |       |      |      |
| CONECT | 22 | 21  | 23   | 24  |        |         |       |      |      |
| CONECT | 23 | 22  | 25   | 31  | 43     |         |       |      |      |
| CONECT | 24 | 22  |      |     |        |         |       |      |      |
| CONECT | 25 | 23  | 30   | 26  | 44     |         |       |      |      |

|         |    |    |    |    |    |
|---------|----|----|----|----|----|
| CONNECT | 26 | 25 | 27 | 45 | 46 |
| CONNECT | 27 | 26 | 28 | 47 | 48 |
| CONNECT | 28 | 27 | 29 | 49 | 50 |
| CONNECT | 29 | 28 | 30 | 51 | 52 |
| CONNECT | 30 | 25 | 29 | 53 | 54 |
| CONNECT | 31 | 23 | 55 | 56 | 57 |
| CONNECT | 32 | 2  |    |    |    |
| CONNECT | 33 | 7  |    |    |    |
| CONNECT | 34 | 9  |    |    |    |
| CONNECT | 35 | 11 |    |    |    |
| CONNECT | 36 | 14 |    |    |    |
| CONNECT | 37 | 16 |    |    |    |
| CONNECT | 38 | 19 |    |    |    |
| CONNECT | 39 | 20 |    |    |    |
| CONNECT | 40 | 20 |    |    |    |
| CONNECT | 41 | 20 |    |    |    |
| CONNECT | 42 | 21 |    |    |    |
| CONNECT | 43 | 23 |    |    |    |
| CONNECT | 44 | 25 |    |    |    |
| CONNECT | 45 | 26 |    |    |    |
| CONNECT | 46 | 26 |    |    |    |
| CONNECT | 47 | 27 |    |    |    |
| CONNECT | 48 | 27 |    |    |    |
| CONNECT | 49 | 28 |    |    |    |
| CONNECT | 50 | 28 |    |    |    |
| CONNECT | 51 | 29 |    |    |    |
| CONNECT | 52 | 29 |    |    |    |
| CONNECT | 53 | 30 |    |    |    |
| CONNECT | 54 | 30 |    |    |    |
| CONNECT | 55 | 31 |    |    |    |
| CONNECT | 56 | 31 |    |    |    |
| CONNECT | 57 | 31 |    |    |    |

ENDMDL  
END

### 13

REMARK 4 COMPLIES WITH FORMAT V. 3.0, 1-DEC-2006  
 REMARK 888  
 REMARK 888 WRITTEN BY MAESTRO (A PRODUCT OF SCHRODINGER, LLC)  
 TITLE compound\_6A  
 MODEL 1  
 HETATM 1 N1 CP14 900 5.514 -3.883 4.571 1.00 0.00  
 N  
 HETATM 2 C1 CP14 900 6.339 -3.401 5.501 1.00 0.00  
 C  
 HETATM 3 C2 CP14 900 7.708 -3.732 5.668 1.00 0.00  
 C  
 HETATM 4 C3 CP14 900 8.245 -4.639 4.726 1.00 0.00  
 C  
 HETATM 5 N2 CP14 900 7.424 -5.154 3.771 1.00 0.00  
 N  
 HETATM 6 C4 CP14 900 6.131 -4.766 3.753 1.00 0.00  
 C  
 HETATM 7 N3 CP14 900 8.219 -3.092 6.767 1.00 0.00  
 N

|        |    |     |      |     |        |        |       |      |      |
|--------|----|-----|------|-----|--------|--------|-------|------|------|
| HETATM | 8  | C5  | CP14 | 900 | 7.234  | -2.356 | 7.217 | 1.00 | 0.00 |
| C      |    |     |      |     |        |        |       |      |      |
| HETATM | 9  | N4  | CP14 | 900 | 6.073  | -2.496 | 6.496 | 1.00 | 0.00 |
| N      |    |     |      |     |        |        |       |      |      |
| HETATM | 10 | N5  | CP14 | 900 | 5.360  | -5.332 | 2.762 | 1.00 | 0.00 |
| N      |    |     |      |     |        |        |       |      |      |
| HETATM | 11 | C6  | CP14 | 900 | 9.674  | -5.104 | 4.689 | 1.00 | 0.00 |
| C      |    |     |      |     |        |        |       |      |      |
| HETATM | 12 | C7  | CP14 | 900 | 9.981  | -6.482 | 4.605 | 1.00 | 0.00 |
| C      |    |     |      |     |        |        |       |      |      |
| HETATM | 13 | C8  | CP14 | 900 | 11.322 | -6.894 | 4.572 | 1.00 | 0.00 |
| C      |    |     |      |     |        |        |       |      |      |
| HETATM | 14 | C9  | CP14 | 900 | 12.352 | -5.970 | 4.638 | 1.00 | 0.00 |
| C      |    |     |      |     |        |        |       |      |      |
| HETATM | 15 | C10 | CP14 | 900 | 12.060 | -4.616 | 4.694 | 1.00 | 0.00 |
| C      |    |     |      |     |        |        |       |      |      |
| HETATM | 16 | C11 | CP14 | 900 | 10.729 | -4.166 | 4.694 | 1.00 | 0.00 |
| C      |    |     |      |     |        |        |       |      |      |
| HETATM | 17 | O1  | CP14 | 900 | 8.938  | -7.392 | 4.572 | 1.00 | 0.00 |
| O      |    |     |      |     |        |        |       |      |      |
| HETATM | 18 | C12 | CP14 | 900 | 9.200  | -8.762 | 4.284 | 1.00 | 0.00 |
| C      |    |     |      |     |        |        |       |      |      |
| HETATM | 19 | O2  | CP14 | 900 | 10.408 | -2.821 | 4.650 | 1.00 | 0.00 |
| O      |    |     |      |     |        |        |       |      |      |
| HETATM | 20 | C13 | CP14 | 900 | 11.444 | -1.849 | 4.524 | 1.00 | 0.00 |
| C      |    |     |      |     |        |        |       |      |      |
| HETATM | 21 | H1  | CP14 | 900 | 7.271  | -1.686 | 8.067 | 1.00 | 0.00 |
| H      |    |     |      |     |        |        |       |      |      |
| HETATM | 22 | H2  | CP14 | 900 | 5.214  | -2.006 | 6.695 | 1.00 | 0.00 |
| H      |    |     |      |     |        |        |       |      |      |
| HETATM | 23 | H3  | CP14 | 900 | 4.395  | -5.058 | 2.689 | 1.00 | 0.00 |
| H      |    |     |      |     |        |        |       |      |      |
| HETATM | 24 | H4  | CP14 | 900 | 5.826  | -5.941 | 2.108 | 1.00 | 0.00 |
| H      |    |     |      |     |        |        |       |      |      |
| HETATM | 25 | H5  | CP14 | 900 | 11.593 | -7.937 | 4.516 | 1.00 | 0.00 |
| H      |    |     |      |     |        |        |       |      |      |
| HETATM | 26 | H6  | CP14 | 900 | 13.375 | -6.314 | 4.627 | 1.00 | 0.00 |
| H      |    |     |      |     |        |        |       |      |      |
| HETATM | 27 | H7  | CP14 | 900 | 12.886 | -3.924 | 4.719 | 1.00 | 0.00 |
| H      |    |     |      |     |        |        |       |      |      |
| HETATM | 28 | H8  | CP14 | 900 | 9.689  | -8.878 | 3.315 | 1.00 | 0.00 |
| H      |    |     |      |     |        |        |       |      |      |
| HETATM | 29 | H9  | CP14 | 900 | 8.256  | -9.306 | 4.240 | 1.00 | 0.00 |
| H      |    |     |      |     |        |        |       |      |      |
| HETATM | 30 | H10 | CP14 | 900 | 9.817  | -9.229 | 5.054 | 1.00 | 0.00 |
| H      |    |     |      |     |        |        |       |      |      |
| HETATM | 31 | H11 | CP14 | 900 | 12.059 | -2.029 | 3.641 | 1.00 | 0.00 |
| H      |    |     |      |     |        |        |       |      |      |
| HETATM | 32 | H12 | CP14 | 900 | 12.081 | -1.831 | 5.409 | 1.00 | 0.00 |
| H      |    |     |      |     |        |        |       |      |      |
| HETATM | 33 | H13 | CP14 | 900 | 11.019 | -0.854 | 4.410 | 1.00 | 0.00 |
| H      |    |     |      |     |        |        |       |      |      |
| CONECT | 1  | 2   | 6    |     |        |        |       |      |      |
| CONECT | 2  | 1   | 3    | 9   |        |        |       |      |      |
| CONECT | 3  | 2   | 4    | 7   |        |        |       |      |      |
| CONECT | 4  | 3   | 5    | 11  |        |        |       |      |      |
| CONECT | 5  | 4   | 6    |     |        |        |       |      |      |

```

CONNECT    6    1    5   10
CONNECT    7    3    8
CONNECT    8    7    9   21
CONNECT    9    2    8   22
CONNECT   10    6   23   24
CONNECT   11    4   16   12
CONNECT   12   11   13   17
CONNECT   13   12   14   25
CONNECT   14   13   15   26
CONNECT   15   14   16   27
CONNECT   16   11   15   19
CONNECT   17   12   18
CONNECT   18   17   28   29   30
CONNECT   19   16   20
CONNECT   20   19   31   32   33
CONNECT   21    8
CONNECT   22    9
CONNECT   23   10
CONNECT   24   10
CONNECT   25   13
CONNECT   26   14
CONNECT   27   15
CONNECT   28   18
CONNECT   29   18
CONNECT   30   18
CONNECT   31   20
CONNECT   32   20
CONNECT   33   20
ENDMDL
END

```

## 14

```

REMARK    4          COMPLIES WITH FORMAT V. 3.0, 1-DEC-2006
REMARK 888
REMARK 888 WRITTEN BY MAESTRO (A PRODUCT OF SCHRODINGER, LLC)
TITLE      compound_16
MODEL      1
HETATM    1  C1  CP15  900          12.146  -6.301   4.477   1.00   0.00
C
HETATM    2  N1  CP15  900          11.244  -5.276   4.650   1.00   0.00
N
HETATM    3  C2  CP15  900           9.841  -5.526   4.628   1.00   0.00
C
HETATM    4  C3  CP15  900           9.419  -6.858   4.427   1.00   0.00
C
HETATM    5  C4  CP15  900          10.339  -7.886   4.232   1.00   0.00
C
HETATM    6  C5  CP15  900          11.704  -7.595   4.252   1.00   0.00
C
HETATM    7  C6  CP15  900           9.173  -4.283   4.845   1.00   0.00
C
HETATM    8  C7  CP15  900          10.180  -3.337   4.972   1.00   0.00
C
HETATM    9  C8  CP15  900          11.438  -3.916   4.864   1.00   0.00
C

```

|              |    |     |      |     |        |         |       |      |      |
|--------------|----|-----|------|-----|--------|---------|-------|------|------|
| HETATM<br>C  | 10 | C9  | CP15 | 900 | 12.738 | -3.248  | 4.972 | 1.00 | 0.00 |
| HETATM<br>C  | 11 | C10 | CP15 | 900 | 12.731 | -1.733  | 5.143 | 1.00 | 0.00 |
| HETATM<br>O  | 12 | O1  | CP15 | 900 | 13.819 | -3.833  | 4.971 | 1.00 | 0.00 |
| HETATM<br>O  | 13 | O2  | CP15 | 900 | 9.818  | -9.150  | 4.038 | 1.00 | 0.00 |
| HETATM<br>C  | 14 | C11 | CP15 | 900 | 7.707  | -4.019  | 4.949 | 1.00 | 0.00 |
| HETATM<br>N  | 15 | N2  | CP15 | 900 | 6.886  | -4.912  | 4.335 | 1.00 | 0.00 |
| HETATM<br>C  | 16 | C12 | CP15 | 900 | 5.545  | -4.725  | 4.416 | 1.00 | 0.00 |
| HETATM<br>C  | 17 | C13 | CP15 | 900 | 4.980  | -3.655  | 5.114 | 1.00 | 0.00 |
| HETATM<br>C  | 18 | C14 | CP15 | 900 | 5.826  | -2.748  | 5.753 | 1.00 | 0.00 |
| HETATM<br>C  | 19 | C15 | CP15 | 900 | 7.206  | -2.932  | 5.675 | 1.00 | 0.00 |
| HETATM<br>Cl | 20 | CL1 | CP15 | 900 | 4.509  | -5.858  | 3.629 | 1.00 | 0.00 |
| HETATM<br>C  | 21 | C16 | CP15 | 900 | 10.662 | -10.293 | 4.171 | 1.00 | 0.00 |
| HETATM<br>C  | 22 | C17 | CP15 | 900 | 11.329 | -10.649 | 2.830 | 1.00 | 0.00 |
| HETATM<br>C  | 23 | C18 | CP15 | 900 | 12.326 | -11.809 | 2.953 | 1.00 | 0.00 |
| HETATM<br>H  | 24 | H1  | CP15 | 900 | 13.196 | -6.072  | 4.496 | 1.00 | 0.00 |
| HETATM<br>H  | 25 | H2  | CP15 | 900 | 8.366  | -7.097  | 4.416 | 1.00 | 0.00 |
| HETATM<br>H  | 26 | H3  | CP15 | 900 | 12.444 | -8.362  | 4.093 | 1.00 | 0.00 |
| HETATM<br>H  | 27 | H4  | CP15 | 900 | 10.008 | -2.285  | 5.146 | 1.00 | 0.00 |
| HETATM<br>H  | 28 | H5  | CP15 | 900 | 13.746 | -1.348  | 5.230 | 1.00 | 0.00 |
| HETATM<br>H  | 29 | H6  | CP15 | 900 | 12.182 | -1.456  | 6.044 | 1.00 | 0.00 |
| HETATM<br>H  | 30 | H7  | CP15 | 900 | 12.251 | -1.258  | 4.288 | 1.00 | 0.00 |
| HETATM<br>H  | 31 | H8  | CP15 | 900 | 3.908  | -3.532  | 5.160 | 1.00 | 0.00 |
| HETATM<br>H  | 32 | H9  | CP15 | 900 | 5.420  | -1.911  | 6.301 | 1.00 | 0.00 |
| HETATM<br>H  | 33 | H10 | CP15 | 900 | 7.868  | -2.237  | 6.171 | 1.00 | 0.00 |
| HETATM<br>H  | 34 | H11 | CP15 | 900 | 11.393 | -10.169 | 4.972 | 1.00 | 0.00 |
| HETATM<br>H  | 35 | H12 | CP15 | 900 | 10.028 | -11.124 | 4.484 | 1.00 | 0.00 |
| HETATM<br>H  | 36 | H13 | CP15 | 900 | 10.556 | -10.907 | 2.105 | 1.00 | 0.00 |
| HETATM<br>H  | 37 | H14 | CP15 | 900 | 11.844 | -9.781  | 2.419 | 1.00 | 0.00 |

[illegible]

## Ensemble docking

**Table S1.** Mean docking score and standard deviation of ensemble docking results.

| Compound | Mean docking score | St. Dev. |
|----------|--------------------|----------|
| 1        | -2.54              | 1.23     |
| 2        | -3.85              | 0.91     |
| 3        | -2.73              | 1.22     |
| 4        | -3.12              | 0.64     |
| 5        | -2.50              | 0.81     |
| 6        | -3.77              | 1.00     |
| 7        | -2.96              | 0.62     |
| 8        | -3.53              | 1.20     |

## Additional MD for 4UIW (simulation time: 1 $\mu$ s)

The calculated MM-GBSA  $\Delta G_{\text{bind}}$  value is -74.27 kcal/mol

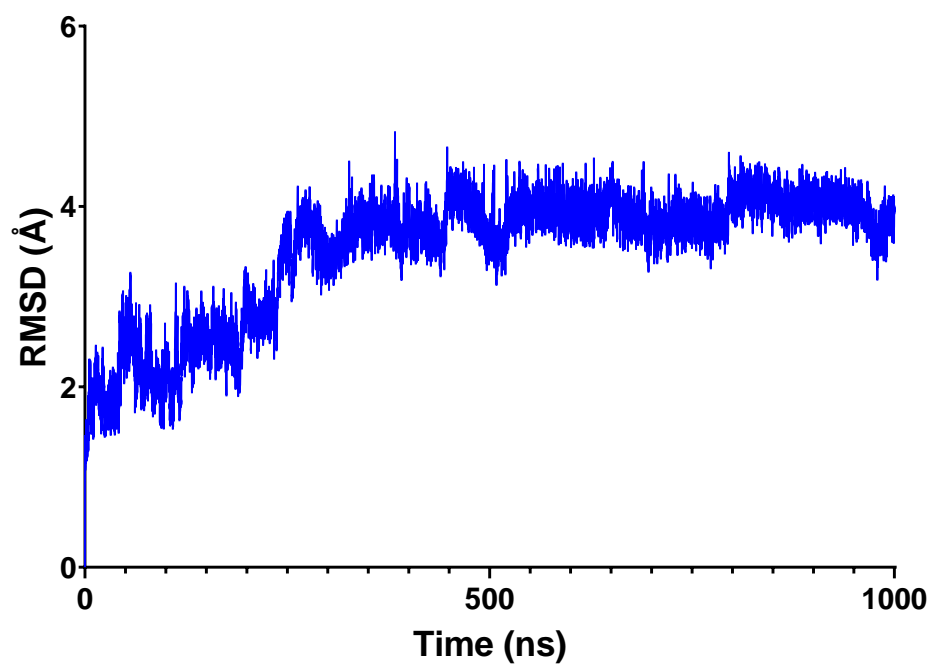

**Figure S1.** RMSD of the backbone atoms of 4UIW.

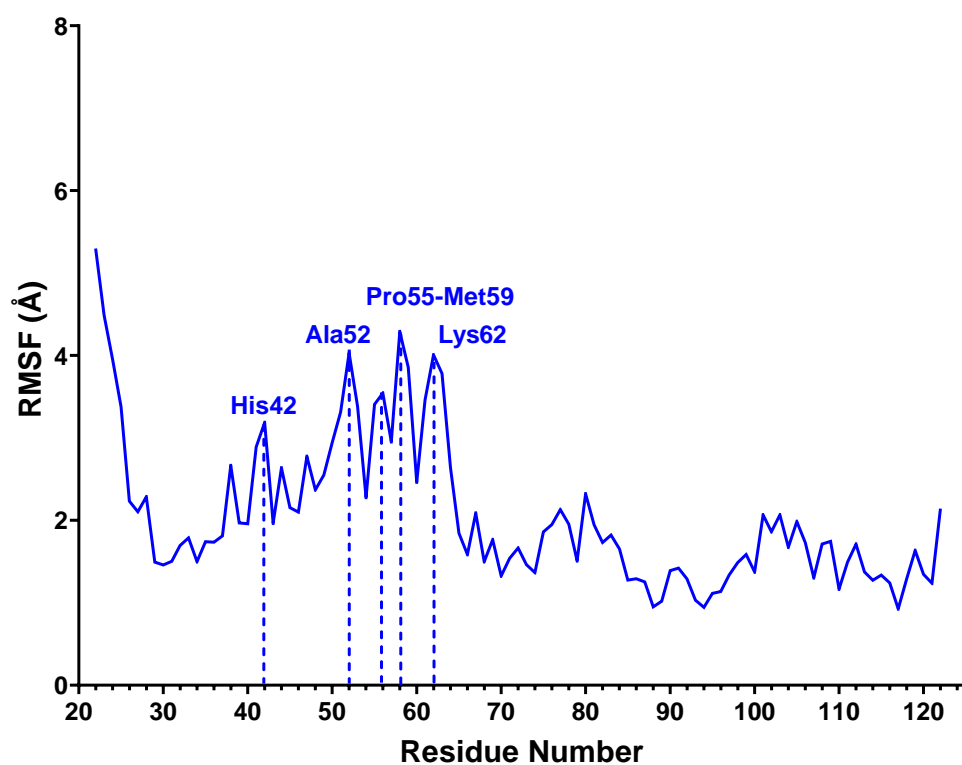

**Figure S2.** RMSF of 4UIW. The data reported are the mean of the backbone and side chains values and residues with an RMSF above 3.0 Å are labeled.

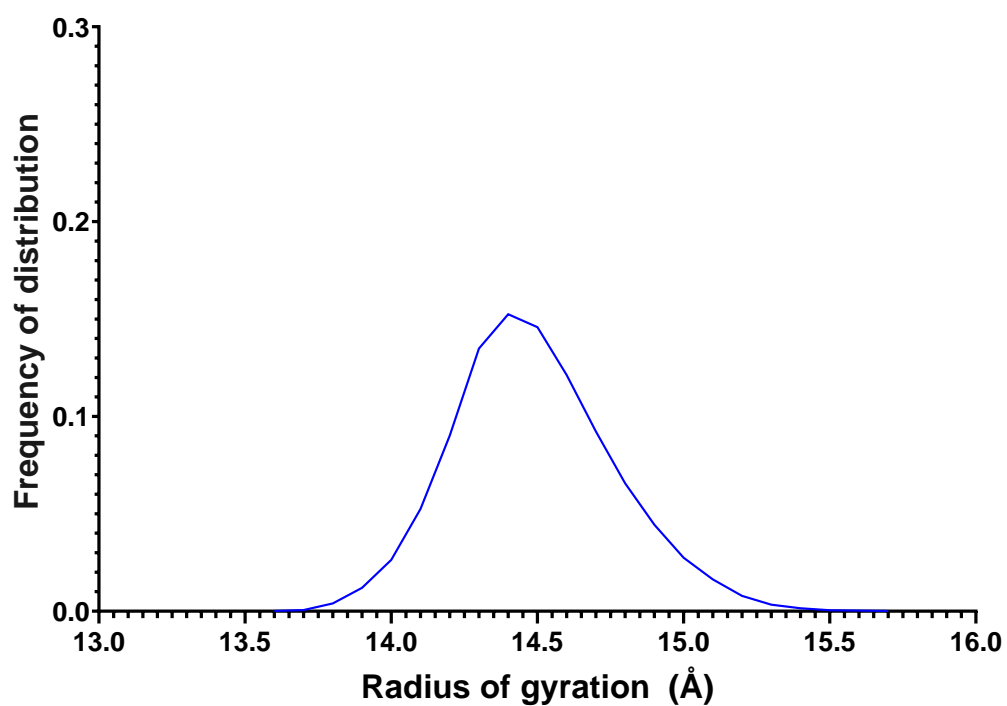

**Figure S3.** The radius of gyration of 4UIW plotted as frequency of distribution.

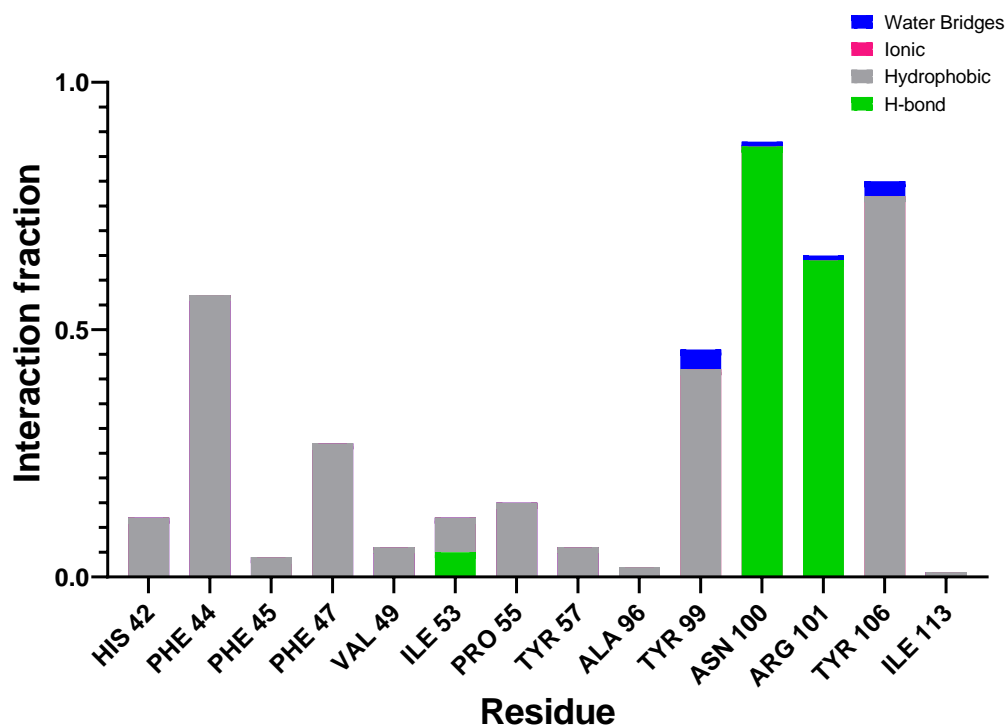

**Figure S4.** Protein-ligand interactions of 4UIW. Values reported are expressed as the fraction of total time.

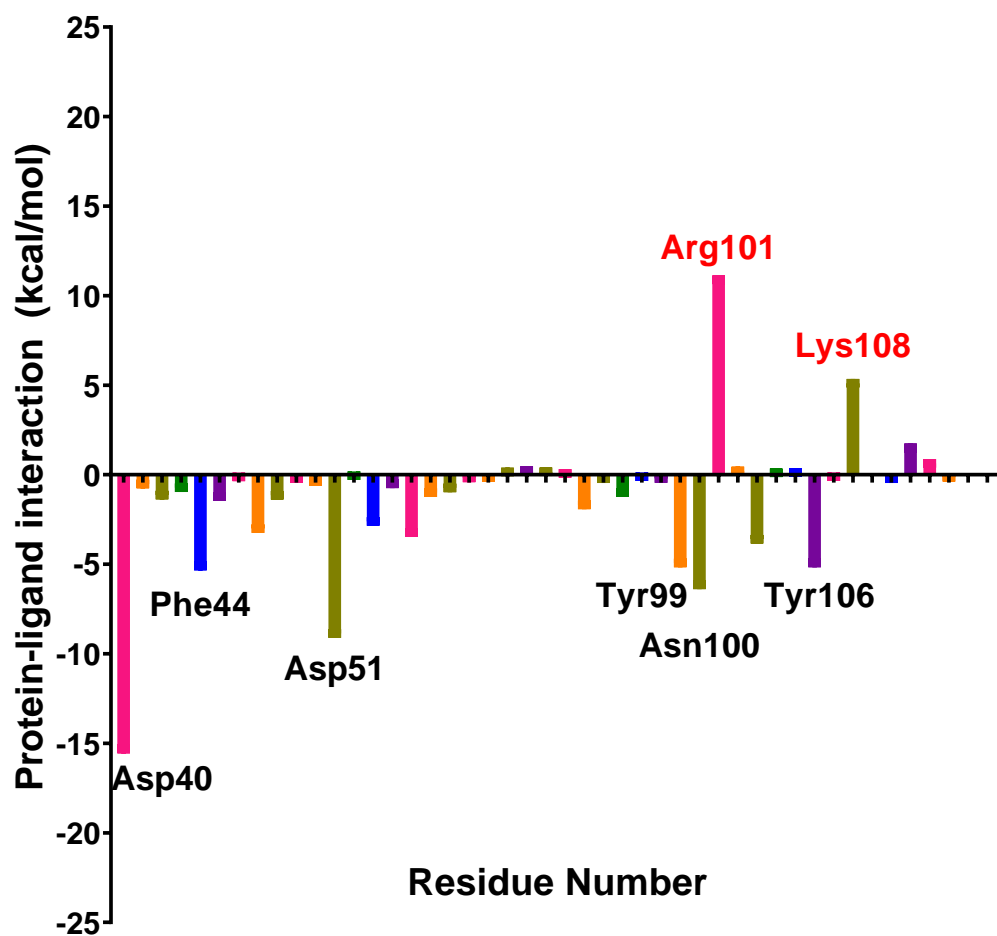

**Figure S5.** Per-residue interaction of 4UIW. Residues with energetic values below -5.0 kcal/mol are labeled in black and residues above +5.0 kcal/mol are labeled in red.
